# Supplementary material for: De Novo Assembly of the Sea Cucumber Apostichopus japonicus Hemocytes Transcriptome to Identify miRNA Targets Associated with Skin Ulceration Syndrome
Source: PLoS One. 2013 Sep 12;8(9):e73506. doi: 10.1371/journal.pone.0073506 (PMC3772007; doi:10.1371/journal.pone.0073506)
Supplement: Table S6 — Summary of predicted miRNAs targets. (XLSX) [file pone.0073506.s006.xlsx]

## Sheet: target_prediction_go_annot
miR	TargetGene	SubjectName	Name	TotScore	TotEnergy	MaxScore	MaxEnergy	miRLen	TargetGeneLen	Positions	GO-Group	GO-ID	Term
spu-miR-2003	comp10008_c0_seq1	F1NK50_CHICK	F1NK50_CHICK Uncharacterized protein (Fragment) OS=Gallus gallus GN=LOC428696 PE=3 SV=1	147	-19.68	147	-19.68	23	1434	389	C	GO:0005886	plasma membrane
spu-miR-2003	comp10008_c0_seq1	F1NK50_CHICK	F1NK50_CHICK Uncharacterized protein (Fragment) OS=Gallus gallus GN=LOC428696 PE=3 SV=1	147	-19.68	147	-19.68	23	1434	389	P	GO:0044057	regulation of system process
spu-miR-2003	comp10008_c0_seq1	F1NK50_CHICK	F1NK50_CHICK Uncharacterized protein (Fragment) OS=Gallus gallus GN=LOC428696 PE=3 SV=1	147	-19.68	147	-19.68	23	1434	389	P	GO:0010033	response to organic substance
spu-miR-2003	comp10008_c0_seq1	F1NK50_CHICK	F1NK50_CHICK Uncharacterized protein (Fragment) OS=Gallus gallus GN=LOC428696 PE=3 SV=1	147	-19.68	147	-19.68	23	1434	389	P	GO:0051240	positive regulation of multicellular organismal process
spu-miR-2003	comp10008_c0_seq1	F1NK50_CHICK	F1NK50_CHICK Uncharacterized protein (Fragment) OS=Gallus gallus GN=LOC428696 PE=3 SV=1	147	-19.68	147	-19.68	23	1434	389	P	GO:0048522	positive regulation of cellular process
spu-miR-2003	comp10008_c0_seq1	F1NK50_CHICK	F1NK50_CHICK Uncharacterized protein (Fragment) OS=Gallus gallus GN=LOC428696 PE=3 SV=1	147	-19.68	147	-19.68	23	1434	389	P	GO:0065008	regulation of biological quality
spu-miR-2003	comp10008_c0_seq1	F1NK50_CHICK	F1NK50_CHICK Uncharacterized protein (Fragment) OS=Gallus gallus GN=LOC428696 PE=3 SV=1	147	-19.68	147	-19.68	23	1434	389	P	GO:0051704	multi-organism process
spu-miR-2003	comp10008_c0_seq1	F1NK50_CHICK	F1NK50_CHICK Uncharacterized protein (Fragment) OS=Gallus gallus GN=LOC428696 PE=3 SV=1	147	-19.68	147	-19.68	23	1434	389	P	GO:0006950	response to stress
spu-miR-2003	comp10008_c0_seq1	F1NK50_CHICK	F1NK50_CHICK Uncharacterized protein (Fragment) OS=Gallus gallus GN=LOC428696 PE=3 SV=1	147	-19.68	147	-19.68	23	1434	389	P	GO:0007610	behavior
spu-miR-2003	comp10008_c0_seq1	F1NK50_CHICK	F1NK50_CHICK Uncharacterized protein (Fragment) OS=Gallus gallus GN=LOC428696 PE=3 SV=1	147	-19.68	147	-19.68	23	1434	389	P	GO:0007187	G-protein coupled receptor signaling pathway, coupled to cyclic nucleotide second messenger
spu-miR-2003	comp10008_c0_seq1	F1NK50_CHICK	F1NK50_CHICK Uncharacterized protein (Fragment) OS=Gallus gallus GN=LOC428696 PE=3 SV=1	147	-19.68	147	-19.68	23	1434	389	P	GO:0007268	synaptic transmission
spu-miR-2003	comp10008_c0_seq1	F1NK50_CHICK	F1NK50_CHICK Uncharacterized protein (Fragment) OS=Gallus gallus GN=LOC428696 PE=3 SV=1	147	-19.68	147	-19.68	23	1434	389	F	GO:0008188	neuropeptide receptor activity
spu-miR-2003	comp10008_c0_seq1	F1NK50_CHICK	F1NK50_CHICK Uncharacterized protein (Fragment) OS=Gallus gallus GN=LOC428696 PE=3 SV=1	147	-19.68	147	-19.68	23	1434	389	P	GO:0009628	response to abiotic stimulus
spu-miR-242	comp10008_c0_seq1	F1NK50_CHICK	F1NK50_CHICK Uncharacterized protein (Fragment) OS=Gallus gallus GN=LOC428696 PE=3 SV=1	145	-27.65	145	-27.65	22	1434	949	C	GO:0005886	plasma membrane
spu-miR-242	comp10008_c0_seq1	F1NK50_CHICK	F1NK50_CHICK Uncharacterized protein (Fragment) OS=Gallus gallus GN=LOC428696 PE=3 SV=1	145	-27.65	145	-27.65	22	1434	949	P	GO:0044057	regulation of system process
spu-miR-242	comp10008_c0_seq1	F1NK50_CHICK	F1NK50_CHICK Uncharacterized protein (Fragment) OS=Gallus gallus GN=LOC428696 PE=3 SV=1	145	-27.65	145	-27.65	22	1434	949	P	GO:0010033	response to organic substance
spu-miR-242	comp10008_c0_seq1	F1NK50_CHICK	F1NK50_CHICK Uncharacterized protein (Fragment) OS=Gallus gallus GN=LOC428696 PE=3 SV=1	145	-27.65	145	-27.65	22	1434	949	P	GO:0051240	positive regulation of multicellular organismal process
spu-miR-242	comp10008_c0_seq1	F1NK50_CHICK	F1NK50_CHICK Uncharacterized protein (Fragment) OS=Gallus gallus GN=LOC428696 PE=3 SV=1	145	-27.65	145	-27.65	22	1434	949	P	GO:0048522	positive regulation of cellular process
spu-miR-242	comp10008_c0_seq1	F1NK50_CHICK	F1NK50_CHICK Uncharacterized protein (Fragment) OS=Gallus gallus GN=LOC428696 PE=3 SV=1	145	-27.65	145	-27.65	22	1434	949	P	GO:0065008	regulation of biological quality
spu-miR-242	comp10008_c0_seq1	F1NK50_CHICK	F1NK50_CHICK Uncharacterized protein (Fragment) OS=Gallus gallus GN=LOC428696 PE=3 SV=1	145	-27.65	145	-27.65	22	1434	949	P	GO:0051704	multi-organism process
spu-miR-242	comp10008_c0_seq1	F1NK50_CHICK	F1NK50_CHICK Uncharacterized protein (Fragment) OS=Gallus gallus GN=LOC428696 PE=3 SV=1	145	-27.65	145	-27.65	22	1434	949	P	GO:0006950	response to stress
spu-miR-242	comp10008_c0_seq1	F1NK50_CHICK	F1NK50_CHICK Uncharacterized protein (Fragment) OS=Gallus gallus GN=LOC428696 PE=3 SV=1	145	-27.65	145	-27.65	22	1434	949	P	GO:0007610	behavior
spu-miR-242	comp10008_c0_seq1	F1NK50_CHICK	F1NK50_CHICK Uncharacterized protein (Fragment) OS=Gallus gallus GN=LOC428696 PE=3 SV=1	145	-27.65	145	-27.65	22	1434	949	P	GO:0007187	G-protein coupled receptor signaling pathway, coupled to cyclic nucleotide second messenger
spu-miR-242	comp10008_c0_seq1	F1NK50_CHICK	F1NK50_CHICK Uncharacterized protein (Fragment) OS=Gallus gallus GN=LOC428696 PE=3 SV=1	145	-27.65	145	-27.65	22	1434	949	P	GO:0007268	synaptic transmission
spu-miR-242	comp10008_c0_seq1	F1NK50_CHICK	F1NK50_CHICK Uncharacterized protein (Fragment) OS=Gallus gallus GN=LOC428696 PE=3 SV=1	145	-27.65	145	-27.65	22	1434	949	F	GO:0008188	neuropeptide receptor activity
spu-miR-242	comp10008_c0_seq1	F1NK50_CHICK	F1NK50_CHICK Uncharacterized protein (Fragment) OS=Gallus gallus GN=LOC428696 PE=3 SV=1	145	-27.65	145	-27.65	22	1434	949	P	GO:0009628	response to abiotic stimulus
spu-miR-29	comp10008_c0_seq1	F1NK50_CHICK	F1NK50_CHICK Uncharacterized protein (Fragment) OS=Gallus gallus GN=LOC428696 PE=3 SV=1	145	-17.26	145	-17.26	22	1434	1096	C	GO:0005886	plasma membrane
spu-miR-29	comp10008_c0_seq1	F1NK50_CHICK	F1NK50_CHICK Uncharacterized protein (Fragment) OS=Gallus gallus GN=LOC428696 PE=3 SV=1	145	-17.26	145	-17.26	22	1434	1096	P	GO:0044057	regulation of system process
spu-miR-29	comp10008_c0_seq1	F1NK50_CHICK	F1NK50_CHICK Uncharacterized protein (Fragment) OS=Gallus gallus GN=LOC428696 PE=3 SV=1	145	-17.26	145	-17.26	22	1434	1096	P	GO:0010033	response to organic substance
spu-miR-29	comp10008_c0_seq1	F1NK50_CHICK	F1NK50_CHICK Uncharacterized protein (Fragment) OS=Gallus gallus GN=LOC428696 PE=3 SV=1	145	-17.26	145	-17.26	22	1434	1096	P	GO:0051240	positive regulation of multicellular organismal process
spu-miR-29	comp10008_c0_seq1	F1NK50_CHICK	F1NK50_CHICK Uncharacterized protein (Fragment) OS=Gallus gallus GN=LOC428696 PE=3 SV=1	145	-17.26	145	-17.26	22	1434	1096	P	GO:0048522	positive regulation of cellular process
spu-miR-29	comp10008_c0_seq1	F1NK50_CHICK	F1NK50_CHICK Uncharacterized protein (Fragment) OS=Gallus gallus GN=LOC428696 PE=3 SV=1	145	-17.26	145	-17.26	22	1434	1096	P	GO:0065008	regulation of biological quality
spu-miR-29	comp10008_c0_seq1	F1NK50_CHICK	F1NK50_CHICK Uncharacterized protein (Fragment) OS=Gallus gallus GN=LOC428696 PE=3 SV=1	145	-17.26	145	-17.26	22	1434	1096	P	GO:0051704	multi-organism process
spu-miR-29	comp10008_c0_seq1	F1NK50_CHICK	F1NK50_CHICK Uncharacterized protein (Fragment) OS=Gallus gallus GN=LOC428696 PE=3 SV=1	145	-17.26	145	-17.26	22	1434	1096	P	GO:0006950	response to stress
spu-miR-29	comp10008_c0_seq1	F1NK50_CHICK	F1NK50_CHICK Uncharacterized protein (Fragment) OS=Gallus gallus GN=LOC428696 PE=3 SV=1	145	-17.26	145	-17.26	22	1434	1096	P	GO:0007610	behavior
spu-miR-29	comp10008_c0_seq1	F1NK50_CHICK	F1NK50_CHICK Uncharacterized protein (Fragment) OS=Gallus gallus GN=LOC428696 PE=3 SV=1	145	-17.26	145	-17.26	22	1434	1096	P	GO:0007187	G-protein coupled receptor signaling pathway, coupled to cyclic nucleotide second messenger
spu-miR-29	comp10008_c0_seq1	F1NK50_CHICK	F1NK50_CHICK Uncharacterized protein (Fragment) OS=Gallus gallus GN=LOC428696 PE=3 SV=1	145	-17.26	145	-17.26	22	1434	1096	P	GO:0007268	synaptic transmission
spu-miR-29	comp10008_c0_seq1	F1NK50_CHICK	F1NK50_CHICK Uncharacterized protein (Fragment) OS=Gallus gallus GN=LOC428696 PE=3 SV=1	145	-17.26	145	-17.26	22	1434	1096	F	GO:0008188	neuropeptide receptor activity
spu-miR-29	comp10008_c0_seq1	F1NK50_CHICK	F1NK50_CHICK Uncharacterized protein (Fragment) OS=Gallus gallus GN=LOC428696 PE=3 SV=1	145	-17.26	145	-17.26	22	1434	1096	P	GO:0009628	response to abiotic stimulus
spu-miR-Scaffold53378_527	comp10008_c0_seq1	F1NK50_CHICK	F1NK50_CHICK Uncharacterized protein (Fragment) OS=Gallus gallus GN=LOC428696 PE=3 SV=1	580	-63.47	151	-18.69	24	1434	811 728 348 636	C	GO:0005886	plasma membrane
spu-miR-Scaffold53378_527	comp10008_c0_seq1	F1NK50_CHICK	F1NK50_CHICK Uncharacterized protein (Fragment) OS=Gallus gallus GN=LOC428696 PE=3 SV=1	580	-63.47	151	-18.69	24	1434	811 728 348 636	P	GO:0044057	regulation of system process
spu-miR-Scaffold53378_527	comp10008_c0_seq1	F1NK50_CHICK	F1NK50_CHICK Uncharacterized protein (Fragment) OS=Gallus gallus GN=LOC428696 PE=3 SV=1	580	-63.47	151	-18.69	24	1434	811 728 348 636	P	GO:0010033	response to organic substance
spu-miR-Scaffold53378_527	comp10008_c0_seq1	F1NK50_CHICK	F1NK50_CHICK Uncharacterized protein (Fragment) OS=Gallus gallus GN=LOC428696 PE=3 SV=1	580	-63.47	151	-18.69	24	1434	811 728 348 636	P	GO:0051240	positive regulation of multicellular organismal process
spu-miR-Scaffold53378_527	comp10008_c0_seq1	F1NK50_CHICK	F1NK50_CHICK Uncharacterized protein (Fragment) OS=Gallus gallus GN=LOC428696 PE=3 SV=1	580	-63.47	151	-18.69	24	1434	811 728 348 636	P	GO:0048522	positive regulation of cellular process
spu-miR-Scaffold53378_527	comp10008_c0_seq1	F1NK50_CHICK	F1NK50_CHICK Uncharacterized protein (Fragment) OS=Gallus gallus GN=LOC428696 PE=3 SV=1	580	-63.47	151	-18.69	24	1434	811 728 348 636	P	GO:0065008	regulation of biological quality
spu-miR-Scaffold53378_527	comp10008_c0_seq1	F1NK50_CHICK	F1NK50_CHICK Uncharacterized protein (Fragment) OS=Gallus gallus GN=LOC428696 PE=3 SV=1	580	-63.47	151	-18.69	24	1434	811 728 348 636	P	GO:0051704	multi-organism process
spu-miR-Scaffold53378_527	comp10008_c0_seq1	F1NK50_CHICK	F1NK50_CHICK Uncharacterized protein (Fragment) OS=Gallus gallus GN=LOC428696 PE=3 SV=1	580	-63.47	151	-18.69	24	1434	811 728 348 636	P	GO:0006950	response to stress
spu-miR-Scaffold53378_527	comp10008_c0_seq1	F1NK50_CHICK	F1NK50_CHICK Uncharacterized protein (Fragment) OS=Gallus gallus GN=LOC428696 PE=3 SV=1	580	-63.47	151	-18.69	24	1434	811 728 348 636	P	GO:0007610	behavior
spu-miR-Scaffold53378_527	comp10008_c0_seq1	F1NK50_CHICK	F1NK50_CHICK Uncharacterized protein (Fragment) OS=Gallus gallus GN=LOC428696 PE=3 SV=1	580	-63.47	151	-18.69	24	1434	811 728 348 636	P	GO:0007187	G-protein coupled receptor signaling pathway, coupled to cyclic nucleotide second messenger
spu-miR-Scaffold53378_527	comp10008_c0_seq1	F1NK50_CHICK	F1NK50_CHICK Uncharacterized protein (Fragment) OS=Gallus gallus GN=LOC428696 PE=3 SV=1	580	-63.47	151	-18.69	24	1434	811 728 348 636	P	GO:0007268	synaptic transmission
spu-miR-Scaffold53378_527	comp10008_c0_seq1	F1NK50_CHICK	F1NK50_CHICK Uncharacterized protein (Fragment) OS=Gallus gallus GN=LOC428696 PE=3 SV=1	580	-63.47	151	-18.69	24	1434	811 728 348 636	F	GO:0008188	neuropeptide receptor activity
spu-miR-Scaffold53378_527	comp10008_c0_seq1	F1NK50_CHICK	F1NK50_CHICK Uncharacterized protein (Fragment) OS=Gallus gallus GN=LOC428696 PE=3 SV=1	580	-63.47	151	-18.69	24	1434	811 728 348 636	P	GO:0009628	response to abiotic stimulus
spu-miR-2003	comp10008_c0_seq2	F1NK50_CHICK	F1NK50_CHICK Uncharacterized protein (Fragment) OS=Gallus gallus GN=LOC428696 PE=3 SV=1	147	-19.68	147	-19.68	23	1275	230	P	GO:0044057	regulation of system process
spu-miR-2003	comp10008_c0_seq2	F1NK50_CHICK	F1NK50_CHICK Uncharacterized protein (Fragment) OS=Gallus gallus GN=LOC428696 PE=3 SV=1	147	-19.68	147	-19.68	23	1275	230	C	GO:0043005	neuron projection
spu-miR-2003	comp10008_c0_seq2	F1NK50_CHICK	F1NK50_CHICK Uncharacterized protein (Fragment) OS=Gallus gallus GN=LOC428696 PE=3 SV=1	147	-19.68	147	-19.68	23	1275	230	P	GO:0043279	response to alkaloid
spu-miR-2003	comp10008_c0_seq2	F1NK50_CHICK	F1NK50_CHICK Uncharacterized protein (Fragment) OS=Gallus gallus GN=LOC428696 PE=3 SV=1	147	-19.68	147	-19.68	23	1275	230	F	GO:0004995	tachykinin receptor activity
spu-miR-2003	comp10008_c0_seq2	F1NK50_CHICK	F1NK50_CHICK Uncharacterized protein (Fragment) OS=Gallus gallus GN=LOC428696 PE=3 SV=1	147	-19.68	147	-19.68	23	1275	230	P	GO:0019222	regulation of metabolic process
spu-miR-2003	comp10008_c0_seq2	F1NK50_CHICK	F1NK50_CHICK Uncharacterized protein (Fragment) OS=Gallus gallus GN=LOC428696 PE=3 SV=1	147	-19.68	147	-19.68	23	1275	230	P	GO:0014070	response to organic cyclic compound
spu-miR-2003	comp10008_c0_seq2	F1NK50_CHICK	F1NK50_CHICK Uncharacterized protein (Fragment) OS=Gallus gallus GN=LOC428696 PE=3 SV=1	147	-19.68	147	-19.68	23	1275	230	C	GO:0044459	plasma membrane part
spu-miR-2003	comp10008_c0_seq2	F1NK50_CHICK	F1NK50_CHICK Uncharacterized protein (Fragment) OS=Gallus gallus GN=LOC428696 PE=3 SV=1	147	-19.68	147	-19.68	23	1275	230	P	GO:0009628	response to abiotic stimulus
spu-miR-2003	comp10008_c0_seq2	F1NK50_CHICK	F1NK50_CHICK Uncharacterized protein (Fragment) OS=Gallus gallus GN=LOC428696 PE=3 SV=1	147	-19.68	147	-19.68	23	1275	230	C	GO:0044424	intracellular part
spu-miR-2003	comp10008_c0_seq2	F1NK50_CHICK	F1NK50_CHICK Uncharacterized protein (Fragment) OS=Gallus gallus GN=LOC428696 PE=3 SV=1	147	-19.68	147	-19.68	23	1275	230	P	GO:0051240	positive regulation of multicellular organismal process
spu-miR-2003	comp10008_c0_seq2	F1NK50_CHICK	F1NK50_CHICK Uncharacterized protein (Fragment) OS=Gallus gallus GN=LOC428696 PE=3 SV=1	147	-19.68	147	-19.68	23	1275	230	P	GO:0007631	feeding behavior
spu-miR-2003	comp10008_c0_seq2	F1NK50_CHICK	F1NK50_CHICK Uncharacterized protein (Fragment) OS=Gallus gallus GN=LOC428696 PE=3 SV=1	147	-19.68	147	-19.68	23	1275	230	P	GO:0048522	positive regulation of cellular process
spu-miR-2003	comp10008_c0_seq2	F1NK50_CHICK	F1NK50_CHICK Uncharacterized protein (Fragment) OS=Gallus gallus GN=LOC428696 PE=3 SV=1	147	-19.68	147	-19.68	23	1275	230	P	GO:0006939	smooth muscle contraction
spu-miR-2003	comp10008_c0_seq2	F1NK50_CHICK	F1NK50_CHICK Uncharacterized protein (Fragment) OS=Gallus gallus GN=LOC428696 PE=3 SV=1	147	-19.68	147	-19.68	23	1275	230	P	GO:0065008	regulation of biological quality
spu-miR-2003	comp10008_c0_seq2	F1NK50_CHICK	F1NK50_CHICK Uncharacterized protein (Fragment) OS=Gallus gallus GN=LOC428696 PE=3 SV=1	147	-19.68	147	-19.68	23	1275	230	P	GO:0008015	blood circulation
spu-miR-2003	comp10008_c0_seq2	F1NK50_CHICK	F1NK50_CHICK Uncharacterized protein (Fragment) OS=Gallus gallus GN=LOC428696 PE=3 SV=1	147	-19.68	147	-19.68	23	1275	230	P	GO:0006950	response to stress
spu-miR-2003	comp10008_c0_seq2	F1NK50_CHICK	F1NK50_CHICK Uncharacterized protein (Fragment) OS=Gallus gallus GN=LOC428696 PE=3 SV=1	147	-19.68	147	-19.68	23	1275	230	P	GO:0007268	synaptic transmission
spu-miR-2003	comp10008_c0_seq2	F1NK50_CHICK	F1NK50_CHICK Uncharacterized protein (Fragment) OS=Gallus gallus GN=LOC428696 PE=3 SV=1	147	-19.68	147	-19.68	23	1275	230	P	GO:0007187	G-protein coupled receptor signaling pathway, coupled to cyclic nucleotide second messenger
spu-miR-2003	comp10008_c0_seq2	F1NK50_CHICK	F1NK50_CHICK Uncharacterized protein (Fragment) OS=Gallus gallus GN=LOC428696 PE=3 SV=1	147	-19.68	147	-19.68	23	1275	230	P	GO:0048545	response to steroid hormone stimulus
spu-miR-242	comp10008_c0_seq2	F1NK50_CHICK	F1NK50_CHICK Uncharacterized protein (Fragment) OS=Gallus gallus GN=LOC428696 PE=3 SV=1	145	-27.65	145	-27.65	22	1275	790	P	GO:0044057	regulation of system process
spu-miR-242	comp10008_c0_seq2	F1NK50_CHICK	F1NK50_CHICK Uncharacterized protein (Fragment) OS=Gallus gallus GN=LOC428696 PE=3 SV=1	145	-27.65	145	-27.65	22	1275	790	C	GO:0043005	neuron projection
spu-miR-242	comp10008_c0_seq2	F1NK50_CHICK	F1NK50_CHICK Uncharacterized protein (Fragment) OS=Gallus gallus GN=LOC428696 PE=3 SV=1	145	-27.65	145	-27.65	22	1275	790	P	GO:0043279	response to alkaloid
spu-miR-242	comp10008_c0_seq2	F1NK50_CHICK	F1NK50_CHICK Uncharacterized protein (Fragment) OS=Gallus gallus GN=LOC428696 PE=3 SV=1	145	-27.65	145	-27.65	22	1275	790	F	GO:0004995	tachykinin receptor activity
spu-miR-242	comp10008_c0_seq2	F1NK50_CHICK	F1NK50_CHICK Uncharacterized protein (Fragment) OS=Gallus gallus GN=LOC428696 PE=3 SV=1	145	-27.65	145	-27.65	22	1275	790	P	GO:0019222	regulation of metabolic process
spu-miR-242	comp10008_c0_seq2	F1NK50_CHICK	F1NK50_CHICK Uncharacterized protein (Fragment) OS=Gallus gallus GN=LOC428696 PE=3 SV=1	145	-27.65	145	-27.65	22	1275	790	P	GO:0014070	response to organic cyclic compound
spu-miR-242	comp10008_c0_seq2	F1NK50_CHICK	F1NK50_CHICK Uncharacterized protein (Fragment) OS=Gallus gallus GN=LOC428696 PE=3 SV=1	145	-27.65	145	-27.65	22	1275	790	C	GO:0044459	plasma membrane part
spu-miR-242	comp10008_c0_seq2	F1NK50_CHICK	F1NK50_CHICK Uncharacterized protein (Fragment) OS=Gallus gallus GN=LOC428696 PE=3 SV=1	145	-27.65	145	-27.65	22	1275	790	P	GO:0009628	response to abiotic stimulus
spu-miR-242	comp10008_c0_seq2	F1NK50_CHICK	F1NK50_CHICK Uncharacterized protein (Fragment) OS=Gallus gallus GN=LOC428696 PE=3 SV=1	145	-27.65	145	-27.65	22	1275	790	C	GO:0044424	intracellular part
spu-miR-242	comp10008_c0_seq2	F1NK50_CHICK	F1NK50_CHICK Uncharacterized protein (Fragment) OS=Gallus gallus GN=LOC428696 PE=3 SV=1	145	-27.65	145	-27.65	22	1275	790	P	GO:0051240	positive regulation of multicellular organismal process
spu-miR-242	comp10008_c0_seq2	F1NK50_CHICK	F1NK50_CHICK Uncharacterized protein (Fragment) OS=Gallus gallus GN=LOC428696 PE=3 SV=1	145	-27.65	145	-27.65	22	1275	790	P	GO:0007631	feeding behavior
spu-miR-242	comp10008_c0_seq2	F1NK50_CHICK	F1NK50_CHICK Uncharacterized protein (Fragment) OS=Gallus gallus GN=LOC428696 PE=3 SV=1	145	-27.65	145	-27.65	22	1275	790	P	GO:0048522	positive regulation of cellular process
spu-miR-242	comp10008_c0_seq2	F1NK50_CHICK	F1NK50_CHICK Uncharacterized protein (Fragment) OS=Gallus gallus GN=LOC428696 PE=3 SV=1	145	-27.65	145	-27.65	22	1275	790	P	GO:0006939	smooth muscle contraction
spu-miR-242	comp10008_c0_seq2	F1NK50_CHICK	F1NK50_CHICK Uncharacterized protein (Fragment) OS=Gallus gallus GN=LOC428696 PE=3 SV=1	145	-27.65	145	-27.65	22	1275	790	P	GO:0065008	regulation of biological quality
spu-miR-242	comp10008_c0_seq2	F1NK50_CHICK	F1NK50_CHICK Uncharacterized protein (Fragment) OS=Gallus gallus GN=LOC428696 PE=3 SV=1	145	-27.65	145	-27.65	22	1275	790	P	GO:0008015	blood circulation
spu-miR-242	comp10008_c0_seq2	F1NK50_CHICK	F1NK50_CHICK Uncharacterized protein (Fragment) OS=Gallus gallus GN=LOC428696 PE=3 SV=1	145	-27.65	145	-27.65	22	1275	790	P	GO:0006950	response to stress
spu-miR-242	comp10008_c0_seq2	F1NK50_CHICK	F1NK50_CHICK Uncharacterized protein (Fragment) OS=Gallus gallus GN=LOC428696 PE=3 SV=1	145	-27.65	145	-27.65	22	1275	790	P	GO:0007268	synaptic transmission
spu-miR-242	comp10008_c0_seq2	F1NK50_CHICK	F1NK50_CHICK Uncharacterized protein (Fragment) OS=Gallus gallus GN=LOC428696 PE=3 SV=1	145	-27.65	145	-27.65	22	1275	790	P	GO:0007187	G-protein coupled receptor signaling pathway, coupled to cyclic nucleotide second messenger
spu-miR-242	comp10008_c0_seq2	F1NK50_CHICK	F1NK50_CHICK Uncharacterized protein (Fragment) OS=Gallus gallus GN=LOC428696 PE=3 SV=1	145	-27.65	145	-27.65	22	1275	790	P	GO:0048545	response to steroid hormone stimulus
spu-miR-29	comp10008_c0_seq2	F1NK50_CHICK	F1NK50_CHICK Uncharacterized protein (Fragment) OS=Gallus gallus GN=LOC428696 PE=3 SV=1	145	-17.26	145	-17.26	22	1275	937	P	GO:0044057	regulation of system process
spu-miR-29	comp10008_c0_seq2	F1NK50_CHICK	F1NK50_CHICK Uncharacterized protein (Fragment) OS=Gallus gallus GN=LOC428696 PE=3 SV=1	145	-17.26	145	-17.26	22	1275	937	C	GO:0043005	neuron projection
spu-miR-29	comp10008_c0_seq2	F1NK50_CHICK	F1NK50_CHICK Uncharacterized protein (Fragment) OS=Gallus gallus GN=LOC428696 PE=3 SV=1	145	-17.26	145	-17.26	22	1275	937	P	GO:0043279	response to alkaloid
spu-miR-29	comp10008_c0_seq2	F1NK50_CHICK	F1NK50_CHICK Uncharacterized protein (Fragment) OS=Gallus gallus GN=LOC428696 PE=3 SV=1	145	-17.26	145	-17.26	22	1275	937	F	GO:0004995	tachykinin receptor activity
spu-miR-29	comp10008_c0_seq2	F1NK50_CHICK	F1NK50_CHICK Uncharacterized protein (Fragment) OS=Gallus gallus GN=LOC428696 PE=3 SV=1	145	-17.26	145	-17.26	22	1275	937	P	GO:0019222	regulation of metabolic process
spu-miR-29	comp10008_c0_seq2	F1NK50_CHICK	F1NK50_CHICK Uncharacterized protein (Fragment) OS=Gallus gallus GN=LOC428696 PE=3 SV=1	145	-17.26	145	-17.26	22	1275	937	P	GO:0014070	response to organic cyclic compound
spu-miR-29	comp10008_c0_seq2	F1NK50_CHICK	F1NK50_CHICK Uncharacterized protein (Fragment) OS=Gallus gallus GN=LOC428696 PE=3 SV=1	145	-17.26	145	-17.26	22	1275	937	C	GO:0044459	plasma membrane part
spu-miR-29	comp10008_c0_seq2	F1NK50_CHICK	F1NK50_CHICK Uncharacterized protein (Fragment) OS=Gallus gallus GN=LOC428696 PE=3 SV=1	145	-17.26	145	-17.26	22	1275	937	P	GO:0009628	response to abiotic stimulus
spu-miR-29	comp10008_c0_seq2	F1NK50_CHICK	F1NK50_CHICK Uncharacterized protein (Fragment) OS=Gallus gallus GN=LOC428696 PE=3 SV=1	145	-17.26	145	-17.26	22	1275	937	C	GO:0044424	intracellular part
spu-miR-29	comp10008_c0_seq2	F1NK50_CHICK	F1NK50_CHICK Uncharacterized protein (Fragment) OS=Gallus gallus GN=LOC428696 PE=3 SV=1	145	-17.26	145	-17.26	22	1275	937	P	GO:0051240	positive regulation of multicellular organismal process
spu-miR-29	comp10008_c0_seq2	F1NK50_CHICK	F1NK50_CHICK Uncharacterized protein (Fragment) OS=Gallus gallus GN=LOC428696 PE=3 SV=1	145	-17.26	145	-17.26	22	1275	937	P	GO:0007631	feeding behavior
spu-miR-29	comp10008_c0_seq2	F1NK50_CHICK	F1NK50_CHICK Uncharacterized protein (Fragment) OS=Gallus gallus GN=LOC428696 PE=3 SV=1	145	-17.26	145	-17.26	22	1275	937	P	GO:0048522	positive regulation of cellular process
spu-miR-29	comp10008_c0_seq2	F1NK50_CHICK	F1NK50_CHICK Uncharacterized protein (Fragment) OS=Gallus gallus GN=LOC428696 PE=3 SV=1	145	-17.26	145	-17.26	22	1275	937	P	GO:0006939	smooth muscle contraction
spu-miR-29	comp10008_c0_seq2	F1NK50_CHICK	F1NK50_CHICK Uncharacterized protein (Fragment) OS=Gallus gallus GN=LOC428696 PE=3 SV=1	145	-17.26	145	-17.26	22	1275	937	P	GO:0065008	regulation of biological quality
spu-miR-29	comp10008_c0_seq2	F1NK50_CHICK	F1NK50_CHICK Uncharacterized protein (Fragment) OS=Gallus gallus GN=LOC428696 PE=3 SV=1	145	-17.26	145	-17.26	22	1275	937	P	GO:0008015	blood circulation
spu-miR-29	comp10008_c0_seq2	F1NK50_CHICK	F1NK50_CHICK Uncharacterized protein (Fragment) OS=Gallus gallus GN=LOC428696 PE=3 SV=1	145	-17.26	145	-17.26	22	1275	937	P	GO:0006950	response to stress
spu-miR-29	comp10008_c0_seq2	F1NK50_CHICK	F1NK50_CHICK Uncharacterized protein (Fragment) OS=Gallus gallus GN=LOC428696 PE=3 SV=1	145	-17.26	145	-17.26	22	1275	937	P	GO:0007268	synaptic transmission
spu-miR-29	comp10008_c0_seq2	F1NK50_CHICK	F1NK50_CHICK Uncharacterized protein (Fragment) OS=Gallus gallus GN=LOC428696 PE=3 SV=1	145	-17.26	145	-17.26	22	1275	937	P	GO:0007187	G-protein coupled receptor signaling pathway, coupled to cyclic nucleotide second messenger
spu-miR-29	comp10008_c0_seq2	F1NK50_CHICK	F1NK50_CHICK Uncharacterized protein (Fragment) OS=Gallus gallus GN=LOC428696 PE=3 SV=1	145	-17.26	145	-17.26	22	1275	937	P	GO:0048545	response to steroid hormone stimulus
spu-miR-Scaffold53378_527	comp10008_c0_seq2	F1NK50_CHICK	F1NK50_CHICK Uncharacterized protein (Fragment) OS=Gallus gallus GN=LOC428696 PE=3 SV=1	580	-63.47	151	-18.69	24	1275	652 569 189 477	P	GO:0044057	regulation of system process
spu-miR-Scaffold53378_527	comp10008_c0_seq2	F1NK50_CHICK	F1NK50_CHICK Uncharacterized protein (Fragment) OS=Gallus gallus GN=LOC428696 PE=3 SV=1	580	-63.47	151	-18.69	24	1275	652 569 189 477	C	GO:0043005	neuron projection
spu-miR-Scaffold53378_527	comp10008_c0_seq2	F1NK50_CHICK	F1NK50_CHICK Uncharacterized protein (Fragment) OS=Gallus gallus GN=LOC428696 PE=3 SV=1	580	-63.47	151	-18.69	24	1275	652 569 189 477	P	GO:0043279	response to alkaloid
spu-miR-Scaffold53378_527	comp10008_c0_seq2	F1NK50_CHICK	F1NK50_CHICK Uncharacterized protein (Fragment) OS=Gallus gallus GN=LOC428696 PE=3 SV=1	580	-63.47	151	-18.69	24	1275	652 569 189 477	F	GO:0004995	tachykinin receptor activity
spu-miR-Scaffold53378_527	comp10008_c0_seq2	F1NK50_CHICK	F1NK50_CHICK Uncharacterized protein (Fragment) OS=Gallus gallus GN=LOC428696 PE=3 SV=1	580	-63.47	151	-18.69	24	1275	652 569 189 477	P	GO:0019222	regulation of metabolic process
spu-miR-Scaffold53378_527	comp10008_c0_seq2	F1NK50_CHICK	F1NK50_CHICK Uncharacterized protein (Fragment) OS=Gallus gallus GN=LOC428696 PE=3 SV=1	580	-63.47	151	-18.69	24	1275	652 569 189 477	P	GO:0014070	response to organic cyclic compound
spu-miR-Scaffold53378_527	comp10008_c0_seq2	F1NK50_CHICK	F1NK50_CHICK Uncharacterized protein (Fragment) OS=Gallus gallus GN=LOC428696 PE=3 SV=1	580	-63.47	151	-18.69	24	1275	652 569 189 477	C	GO:0044459	plasma membrane part
spu-miR-Scaffold53378_527	comp10008_c0_seq2	F1NK50_CHICK	F1NK50_CHICK Uncharacterized protein (Fragment) OS=Gallus gallus GN=LOC428696 PE=3 SV=1	580	-63.47	151	-18.69	24	1275	652 569 189 477	P	GO:0009628	response to abiotic stimulus
spu-miR-Scaffold53378_527	comp10008_c0_seq2	F1NK50_CHICK	F1NK50_CHICK Uncharacterized protein (Fragment) OS=Gallus gallus GN=LOC428696 PE=3 SV=1	580	-63.47	151	-18.69	24	1275	652 569 189 477	C	GO:0044424	intracellular part
spu-miR-Scaffold53378_527	comp10008_c0_seq2	F1NK50_CHICK	F1NK50_CHICK Uncharacterized protein (Fragment) OS=Gallus gallus GN=LOC428696 PE=3 SV=1	580	-63.47	151	-18.69	24	1275	652 569 189 477	P	GO:0051240	positive regulation of multicellular organismal process
spu-miR-Scaffold53378_527	comp10008_c0_seq2	F1NK50_CHICK	F1NK50_CHICK Uncharacterized protein (Fragment) OS=Gallus gallus GN=LOC428696 PE=3 SV=1	580	-63.47	151	-18.69	24	1275	652 569 189 477	P	GO:0007631	feeding behavior
spu-miR-Scaffold53378_527	comp10008_c0_seq2	F1NK50_CHICK	F1NK50_CHICK Uncharacterized protein (Fragment) OS=Gallus gallus GN=LOC428696 PE=3 SV=1	580	-63.47	151	-18.69	24	1275	652 569 189 477	P	GO:0048522	positive regulation of cellular process
spu-miR-Scaffold53378_527	comp10008_c0_seq2	F1NK50_CHICK	F1NK50_CHICK Uncharacterized protein (Fragment) OS=Gallus gallus GN=LOC428696 PE=3 SV=1	580	-63.47	151	-18.69	24	1275	652 569 189 477	P	GO:0006939	smooth muscle contraction
spu-miR-Scaffold53378_527	comp10008_c0_seq2	F1NK50_CHICK	F1NK50_CHICK Uncharacterized protein (Fragment) OS=Gallus gallus GN=LOC428696 PE=3 SV=1	580	-63.47	151	-18.69	24	1275	652 569 189 477	P	GO:0065008	regulation of biological quality
spu-miR-Scaffold53378_527	comp10008_c0_seq2	F1NK50_CHICK	F1NK50_CHICK Uncharacterized protein (Fragment) OS=Gallus gallus GN=LOC428696 PE=3 SV=1	580	-63.47	151	-18.69	24	1275	652 569 189 477	P	GO:0008015	blood circulation
spu-miR-Scaffold53378_527	comp10008_c0_seq2	F1NK50_CHICK	F1NK50_CHICK Uncharacterized protein (Fragment) OS=Gallus gallus GN=LOC428696 PE=3 SV=1	580	-63.47	151	-18.69	24	1275	652 569 189 477	P	GO:0006950	response to stress
spu-miR-Scaffold53378_527	comp10008_c0_seq2	F1NK50_CHICK	F1NK50_CHICK Uncharacterized protein (Fragment) OS=Gallus gallus GN=LOC428696 PE=3 SV=1	580	-63.47	151	-18.69	24	1275	652 569 189 477	P	GO:0007268	synaptic transmission
spu-miR-Scaffold53378_527	comp10008_c0_seq2	F1NK50_CHICK	F1NK50_CHICK Uncharacterized protein (Fragment) OS=Gallus gallus GN=LOC428696 PE=3 SV=1	580	-63.47	151	-18.69	24	1275	652 569 189 477	P	GO:0007187	G-protein coupled receptor signaling pathway, coupled to cyclic nucleotide second messenger
spu-miR-Scaffold53378_527	comp10008_c0_seq2	F1NK50_CHICK	F1NK50_CHICK Uncharacterized protein (Fragment) OS=Gallus gallus GN=LOC428696 PE=3 SV=1	580	-63.47	151	-18.69	24	1275	652 569 189 477	P	GO:0048545	response to steroid hormone stimulus
spu-miR-2013	comp10116_c0_seq1	Q9U721_DROME	Q9U721_DROME Allatostatin receptor OS=Drosophila melanogaster GN=AlstR PE=2 SV=1	145	-19.4	145	-19.4	21	1648	1402	C	GO:0016020	membrane
spu-miR-2013	comp10116_c0_seq1	Q9U721_DROME	Q9U721_DROME Allatostatin receptor OS=Drosophila melanogaster GN=AlstR PE=2 SV=1	145	-19.4	145	-19.4	21	1648	1402	P	GO:0007268	synaptic transmission
spu-miR-2013	comp10116_c0_seq1	Q9U721_DROME	Q9U721_DROME Allatostatin receptor OS=Drosophila melanogaster GN=AlstR PE=2 SV=1	145	-19.4	145	-19.4	21	1648	1402	P	GO:0007187	G-protein coupled receptor signaling pathway, coupled to cyclic nucleotide second messenger
spu-miR-2013	comp10116_c0_seq1	Q9U721_DROME	Q9U721_DROME Allatostatin receptor OS=Drosophila melanogaster GN=AlstR PE=2 SV=1	145	-19.4	145	-19.4	21	1648	1402	F	GO:0008188	neuropeptide receptor activity
spu-miR-2013	comp10116_c0_seq1	Q9U721_DROME	Q9U721_DROME Allatostatin receptor OS=Drosophila melanogaster GN=AlstR PE=2 SV=1	145	-19.4	145	-19.4	21	1648	1402	P	GO:0048513	organ development
spu-miR-2013	comp10116_c0_seq1	Q9U721_DROME	Q9U721_DROME Allatostatin receptor OS=Drosophila melanogaster GN=AlstR PE=2 SV=1	145	-19.4	145	-19.4	21	1648	1402	P	GO:0007417	central nervous system development
spu-miR-2008	comp10116_c0_seq1	Q9U721_DROME	Q9U721_DROME Allatostatin receptor OS=Drosophila melanogaster GN=AlstR PE=2 SV=1	303	-36.35	154	-18.43	21	1648	886 116	C	GO:0016020	membrane
spu-miR-2008	comp10116_c0_seq1	Q9U721_DROME	Q9U721_DROME Allatostatin receptor OS=Drosophila melanogaster GN=AlstR PE=2 SV=1	303	-36.35	154	-18.43	21	1648	886 116	P	GO:0007268	synaptic transmission
spu-miR-2008	comp10116_c0_seq1	Q9U721_DROME	Q9U721_DROME Allatostatin receptor OS=Drosophila melanogaster GN=AlstR PE=2 SV=1	303	-36.35	154	-18.43	21	1648	886 116	P	GO:0007187	G-protein coupled receptor signaling pathway, coupled to cyclic nucleotide second messenger
spu-miR-2008	comp10116_c0_seq1	Q9U721_DROME	Q9U721_DROME Allatostatin receptor OS=Drosophila melanogaster GN=AlstR PE=2 SV=1	303	-36.35	154	-18.43	21	1648	886 116	F	GO:0008188	neuropeptide receptor activity
spu-miR-2008	comp10116_c0_seq1	Q9U721_DROME	Q9U721_DROME Allatostatin receptor OS=Drosophila melanogaster GN=AlstR PE=2 SV=1	303	-36.35	154	-18.43	21	1648	886 116	P	GO:0048513	organ development
spu-miR-2008	comp10116_c0_seq1	Q9U721_DROME	Q9U721_DROME Allatostatin receptor OS=Drosophila melanogaster GN=AlstR PE=2 SV=1	303	-36.35	154	-18.43	21	1648	886 116	P	GO:0007417	central nervous system development
spu-miR-2005	comp10116_c0_seq1	Q9U721_DROME	Q9U721_DROME Allatostatin receptor OS=Drosophila melanogaster GN=AlstR PE=2 SV=1	142	-17.12	142	-17.12	24	1648	226	C	GO:0016020	membrane
spu-miR-2005	comp10116_c0_seq1	Q9U721_DROME	Q9U721_DROME Allatostatin receptor OS=Drosophila melanogaster GN=AlstR PE=2 SV=1	142	-17.12	142	-17.12	24	1648	226	P	GO:0007268	synaptic transmission
spu-miR-2005	comp10116_c0_seq1	Q9U721_DROME	Q9U721_DROME Allatostatin receptor OS=Drosophila melanogaster GN=AlstR PE=2 SV=1	142	-17.12	142	-17.12	24	1648	226	P	GO:0007187	G-protein coupled receptor signaling pathway, coupled to cyclic nucleotide second messenger
spu-miR-2005	comp10116_c0_seq1	Q9U721_DROME	Q9U721_DROME Allatostatin receptor OS=Drosophila melanogaster GN=AlstR PE=2 SV=1	142	-17.12	142	-17.12	24	1648	226	F	GO:0008188	neuropeptide receptor activity
spu-miR-2005	comp10116_c0_seq1	Q9U721_DROME	Q9U721_DROME Allatostatin receptor OS=Drosophila melanogaster GN=AlstR PE=2 SV=1	142	-17.12	142	-17.12	24	1648	226	P	GO:0048513	organ development
spu-miR-2005	comp10116_c0_seq1	Q9U721_DROME	Q9U721_DROME Allatostatin receptor OS=Drosophila melanogaster GN=AlstR PE=2 SV=1	142	-17.12	142	-17.12	24	1648	226	P	GO:0007417	central nervous system development
spu-miR-4847	comp10116_c0_seq1	Q9U721_DROME	Q9U721_DROME Allatostatin receptor OS=Drosophila melanogaster GN=AlstR PE=2 SV=1	153	-23.96	153	-23.96	22	1648	494	C	GO:0016020	membrane
spu-miR-4847	comp10116_c0_seq1	Q9U721_DROME	Q9U721_DROME Allatostatin receptor OS=Drosophila melanogaster GN=AlstR PE=2 SV=1	153	-23.96	153	-23.96	22	1648	494	P	GO:0007268	synaptic transmission
spu-miR-4847	comp10116_c0_seq1	Q9U721_DROME	Q9U721_DROME Allatostatin receptor OS=Drosophila melanogaster GN=AlstR PE=2 SV=1	153	-23.96	153	-23.96	22	1648	494	P	GO:0007187	G-protein coupled receptor signaling pathway, coupled to cyclic nucleotide second messenger
spu-miR-4847	comp10116_c0_seq1	Q9U721_DROME	Q9U721_DROME Allatostatin receptor OS=Drosophila melanogaster GN=AlstR PE=2 SV=1	153	-23.96	153	-23.96	22	1648	494	F	GO:0008188	neuropeptide receptor activity
spu-miR-4847	comp10116_c0_seq1	Q9U721_DROME	Q9U721_DROME Allatostatin receptor OS=Drosophila melanogaster GN=AlstR PE=2 SV=1	153	-23.96	153	-23.96	22	1648	494	P	GO:0048513	organ development
spu-miR-4847	comp10116_c0_seq1	Q9U721_DROME	Q9U721_DROME Allatostatin receptor OS=Drosophila melanogaster GN=AlstR PE=2 SV=1	153	-23.96	153	-23.96	22	1648	494	P	GO:0007417	central nervous system development
spu-miR-4853	comp10116_c0_seq1	Q9U721_DROME	Q9U721_DROME Allatostatin receptor OS=Drosophila melanogaster GN=AlstR PE=2 SV=1	147	-17.93	147	-17.93	24	1648	143	C	GO:0016020	membrane
spu-miR-4853	comp10116_c0_seq1	Q9U721_DROME	Q9U721_DROME Allatostatin receptor OS=Drosophila melanogaster GN=AlstR PE=2 SV=1	147	-17.93	147	-17.93	24	1648	143	P	GO:0007268	synaptic transmission
spu-miR-4853	comp10116_c0_seq1	Q9U721_DROME	Q9U721_DROME Allatostatin receptor OS=Drosophila melanogaster GN=AlstR PE=2 SV=1	147	-17.93	147	-17.93	24	1648	143	P	GO:0007187	G-protein coupled receptor signaling pathway, coupled to cyclic nucleotide second messenger
spu-miR-4853	comp10116_c0_seq1	Q9U721_DROME	Q9U721_DROME Allatostatin receptor OS=Drosophila melanogaster GN=AlstR PE=2 SV=1	147	-17.93	147	-17.93	24	1648	143	F	GO:0008188	neuropeptide receptor activity
spu-miR-4853	comp10116_c0_seq1	Q9U721_DROME	Q9U721_DROME Allatostatin receptor OS=Drosophila melanogaster GN=AlstR PE=2 SV=1	147	-17.93	147	-17.93	24	1648	143	P	GO:0048513	organ development
spu-miR-4853	comp10116_c0_seq1	Q9U721_DROME	Q9U721_DROME Allatostatin receptor OS=Drosophila melanogaster GN=AlstR PE=2 SV=1	147	-17.93	147	-17.93	24	1648	143	P	GO:0007417	central nervous system development
spu-miR-200	comp10116_c0_seq1	Q9U721_DROME	Q9U721_DROME Allatostatin receptor OS=Drosophila melanogaster GN=AlstR PE=2 SV=1	140	-20.02	140	-20.02	23	1648	1544	C	GO:0016020	membrane
spu-miR-200	comp10116_c0_seq1	Q9U721_DROME	Q9U721_DROME Allatostatin receptor OS=Drosophila melanogaster GN=AlstR PE=2 SV=1	140	-20.02	140	-20.02	23	1648	1544	P	GO:0007268	synaptic transmission
spu-miR-200	comp10116_c0_seq1	Q9U721_DROME	Q9U721_DROME Allatostatin receptor OS=Drosophila melanogaster GN=AlstR PE=2 SV=1	140	-20.02	140	-20.02	23	1648	1544	P	GO:0007187	G-protein coupled receptor signaling pathway, coupled to cyclic nucleotide second messenger
spu-miR-200	comp10116_c0_seq1	Q9U721_DROME	Q9U721_DROME Allatostatin receptor OS=Drosophila melanogaster GN=AlstR PE=2 SV=1	140	-20.02	140	-20.02	23	1648	1544	F	GO:0008188	neuropeptide receptor activity
spu-miR-200	comp10116_c0_seq1	Q9U721_DROME	Q9U721_DROME Allatostatin receptor OS=Drosophila melanogaster GN=AlstR PE=2 SV=1	140	-20.02	140	-20.02	23	1648	1544	P	GO:0048513	organ development
spu-miR-200	comp10116_c0_seq1	Q9U721_DROME	Q9U721_DROME Allatostatin receptor OS=Drosophila melanogaster GN=AlstR PE=2 SV=1	140	-20.02	140	-20.02	23	1648	1544	P	GO:0007417	central nervous system development
spu-miR-375	comp10116_c0_seq1	Q9U721_DROME	Q9U721_DROME Allatostatin receptor OS=Drosophila melanogaster GN=AlstR PE=2 SV=1	144	-19.76	144	-19.76	22	1648	591	C	GO:0016020	membrane
spu-miR-375	comp10116_c0_seq1	Q9U721_DROME	Q9U721_DROME Allatostatin receptor OS=Drosophila melanogaster GN=AlstR PE=2 SV=1	144	-19.76	144	-19.76	22	1648	591	P	GO:0007268	synaptic transmission
spu-miR-375	comp10116_c0_seq1	Q9U721_DROME	Q9U721_DROME Allatostatin receptor OS=Drosophila melanogaster GN=AlstR PE=2 SV=1	144	-19.76	144	-19.76	22	1648	591	P	GO:0007187	G-protein coupled receptor signaling pathway, coupled to cyclic nucleotide second messenger
spu-miR-375	comp10116_c0_seq1	Q9U721_DROME	Q9U721_DROME Allatostatin receptor OS=Drosophila melanogaster GN=AlstR PE=2 SV=1	144	-19.76	144	-19.76	22	1648	591	F	GO:0008188	neuropeptide receptor activity
spu-miR-375	comp10116_c0_seq1	Q9U721_DROME	Q9U721_DROME Allatostatin receptor OS=Drosophila melanogaster GN=AlstR PE=2 SV=1	144	-19.76	144	-19.76	22	1648	591	P	GO:0048513	organ development
spu-miR-375	comp10116_c0_seq1	Q9U721_DROME	Q9U721_DROME Allatostatin receptor OS=Drosophila melanogaster GN=AlstR PE=2 SV=1	144	-19.76	144	-19.76	22	1648	591	P	GO:0007417	central nervous system development
spu-miR-7	comp10116_c0_seq1	Q9U721_DROME	Q9U721_DROME Allatostatin receptor OS=Drosophila melanogaster GN=AlstR PE=2 SV=1	148	-20.46	148	-20.46	23	1648	327	C	GO:0016020	membrane
spu-miR-7	comp10116_c0_seq1	Q9U721_DROME	Q9U721_DROME Allatostatin receptor OS=Drosophila melanogaster GN=AlstR PE=2 SV=1	148	-20.46	148	-20.46	23	1648	327	P	GO:0007268	synaptic transmission
spu-miR-7	comp10116_c0_seq1	Q9U721_DROME	Q9U721_DROME Allatostatin receptor OS=Drosophila melanogaster GN=AlstR PE=2 SV=1	148	-20.46	148	-20.46	23	1648	327	P	GO:0007187	G-protein coupled receptor signaling pathway, coupled to cyclic nucleotide second messenger
spu-miR-7	comp10116_c0_seq1	Q9U721_DROME	Q9U721_DROME Allatostatin receptor OS=Drosophila melanogaster GN=AlstR PE=2 SV=1	148	-20.46	148	-20.46	23	1648	327	F	GO:0008188	neuropeptide receptor activity
spu-miR-7	comp10116_c0_seq1	Q9U721_DROME	Q9U721_DROME Allatostatin receptor OS=Drosophila melanogaster GN=AlstR PE=2 SV=1	148	-20.46	148	-20.46	23	1648	327	P	GO:0048513	organ development
spu-miR-7	comp10116_c0_seq1	Q9U721_DROME	Q9U721_DROME Allatostatin receptor OS=Drosophila melanogaster GN=AlstR PE=2 SV=1	148	-20.46	148	-20.46	23	1648	327	P	GO:0007417	central nervous system development
spu-miR-4854	comp10116_c0_seq1	Q9U721_DROME	Q9U721_DROME Allatostatin receptor OS=Drosophila melanogaster GN=AlstR PE=2 SV=1	144	-21.49	144	-21.49	22	1648	1473	C	GO:0016020	membrane
spu-miR-4854	comp10116_c0_seq1	Q9U721_DROME	Q9U721_DROME Allatostatin receptor OS=Drosophila melanogaster GN=AlstR PE=2 SV=1	144	-21.49	144	-21.49	22	1648	1473	P	GO:0007268	synaptic transmission
spu-miR-4854	comp10116_c0_seq1	Q9U721_DROME	Q9U721_DROME Allatostatin receptor OS=Drosophila melanogaster GN=AlstR PE=2 SV=1	144	-21.49	144	-21.49	22	1648	1473	P	GO:0007187	G-protein coupled receptor signaling pathway, coupled to cyclic nucleotide second messenger
spu-miR-4854	comp10116_c0_seq1	Q9U721_DROME	Q9U721_DROME Allatostatin receptor OS=Drosophila melanogaster GN=AlstR PE=2 SV=1	144	-21.49	144	-21.49	22	1648	1473	F	GO:0008188	neuropeptide receptor activity
spu-miR-4854	comp10116_c0_seq1	Q9U721_DROME	Q9U721_DROME Allatostatin receptor OS=Drosophila melanogaster GN=AlstR PE=2 SV=1	144	-21.49	144	-21.49	22	1648	1473	P	GO:0048513	organ development
spu-miR-4854	comp10116_c0_seq1	Q9U721_DROME	Q9U721_DROME Allatostatin receptor OS=Drosophila melanogaster GN=AlstR PE=2 SV=1	144	-21.49	144	-21.49	22	1648	1473	P	GO:0007417	central nervous system development
spu-miR-34	comp10116_c0_seq1	Q9U721_DROME	Q9U721_DROME Allatostatin receptor OS=Drosophila melanogaster GN=AlstR PE=2 SV=1	148	-25.18	148	-25.18	22	1648	1039	C	GO:0016020	membrane
spu-miR-34	comp10116_c0_seq1	Q9U721_DROME	Q9U721_DROME Allatostatin receptor OS=Drosophila melanogaster GN=AlstR PE=2 SV=1	148	-25.18	148	-25.18	22	1648	1039	P	GO:0007268	synaptic transmission
spu-miR-34	comp10116_c0_seq1	Q9U721_DROME	Q9U721_DROME Allatostatin receptor OS=Drosophila melanogaster GN=AlstR PE=2 SV=1	148	-25.18	148	-25.18	22	1648	1039	P	GO:0007187	G-protein coupled receptor signaling pathway, coupled to cyclic nucleotide second messenger
spu-miR-34	comp10116_c0_seq1	Q9U721_DROME	Q9U721_DROME Allatostatin receptor OS=Drosophila melanogaster GN=AlstR PE=2 SV=1	148	-25.18	148	-25.18	22	1648	1039	F	GO:0008188	neuropeptide receptor activity
spu-miR-34	comp10116_c0_seq1	Q9U721_DROME	Q9U721_DROME Allatostatin receptor OS=Drosophila melanogaster GN=AlstR PE=2 SV=1	148	-25.18	148	-25.18	22	1648	1039	P	GO:0048513	organ development
spu-miR-34	comp10116_c0_seq1	Q9U721_DROME	Q9U721_DROME Allatostatin receptor OS=Drosophila melanogaster GN=AlstR PE=2 SV=1	148	-25.18	148	-25.18	22	1648	1039	P	GO:0007417	central nervous system development
spu-miR-Scaffold31389_1620	comp10116_c0_seq1	Q9U721_DROME	Q9U721_DROME Allatostatin receptor OS=Drosophila melanogaster GN=AlstR PE=2 SV=1	143	-30.1	143	-30.1	18	1648	680	C	GO:0016020	membrane
spu-miR-Scaffold31389_1620	comp10116_c0_seq1	Q9U721_DROME	Q9U721_DROME Allatostatin receptor OS=Drosophila melanogaster GN=AlstR PE=2 SV=1	143	-30.1	143	-30.1	18	1648	680	P	GO:0007268	synaptic transmission
spu-miR-Scaffold31389_1620	comp10116_c0_seq1	Q9U721_DROME	Q9U721_DROME Allatostatin receptor OS=Drosophila melanogaster GN=AlstR PE=2 SV=1	143	-30.1	143	-30.1	18	1648	680	P	GO:0007187	G-protein coupled receptor signaling pathway, coupled to cyclic nucleotide second messenger
spu-miR-Scaffold31389_1620	comp10116_c0_seq1	Q9U721_DROME	Q9U721_DROME Allatostatin receptor OS=Drosophila melanogaster GN=AlstR PE=2 SV=1	143	-30.1	143	-30.1	18	1648	680	F	GO:0008188	neuropeptide receptor activity
spu-miR-Scaffold31389_1620	comp10116_c0_seq1	Q9U721_DROME	Q9U721_DROME Allatostatin receptor OS=Drosophila melanogaster GN=AlstR PE=2 SV=1	143	-30.1	143	-30.1	18	1648	680	P	GO:0048513	organ development
spu-miR-Scaffold31389_1620	comp10116_c0_seq1	Q9U721_DROME	Q9U721_DROME Allatostatin receptor OS=Drosophila melanogaster GN=AlstR PE=2 SV=1	143	-30.1	143	-30.1	18	1648	680	P	GO:0007417	central nervous system development
spu-miR-Scaffold53378_527	comp10116_c0_seq1	Q9U721_DROME	Q9U721_DROME Allatostatin receptor OS=Drosophila melanogaster GN=AlstR PE=2 SV=1	142	-17.01	142	-17.01	24	1648	1237	C	GO:0016020	membrane
spu-miR-Scaffold53378_527	comp10116_c0_seq1	Q9U721_DROME	Q9U721_DROME Allatostatin receptor OS=Drosophila melanogaster GN=AlstR PE=2 SV=1	142	-17.01	142	-17.01	24	1648	1237	P	GO:0007268	synaptic transmission
spu-miR-Scaffold53378_527	comp10116_c0_seq1	Q9U721_DROME	Q9U721_DROME Allatostatin receptor OS=Drosophila melanogaster GN=AlstR PE=2 SV=1	142	-17.01	142	-17.01	24	1648	1237	P	GO:0007187	G-protein coupled receptor signaling pathway, coupled to cyclic nucleotide second messenger
spu-miR-Scaffold53378_527	comp10116_c0_seq1	Q9U721_DROME	Q9U721_DROME Allatostatin receptor OS=Drosophila melanogaster GN=AlstR PE=2 SV=1	142	-17.01	142	-17.01	24	1648	1237	F	GO:0008188	neuropeptide receptor activity
spu-miR-Scaffold53378_527	comp10116_c0_seq1	Q9U721_DROME	Q9U721_DROME Allatostatin receptor OS=Drosophila melanogaster GN=AlstR PE=2 SV=1	142	-17.01	142	-17.01	24	1648	1237	P	GO:0048513	organ development
spu-miR-Scaffold53378_527	comp10116_c0_seq1	Q9U721_DROME	Q9U721_DROME Allatostatin receptor OS=Drosophila melanogaster GN=AlstR PE=2 SV=1	142	-17.01	142	-17.01	24	1648	1237	P	GO:0007417	central nervous system development
spu-miR-2005	comp10116_c0_seq2	Q9U721_DROME	Q9U721_DROME Allatostatin receptor OS=Drosophila melanogaster GN=AlstR PE=2 SV=1	146	-21.17	146	-21.17	24	1629	207	C	GO:0016020	membrane
spu-miR-2005	comp10116_c0_seq2	Q9U721_DROME	Q9U721_DROME Allatostatin receptor OS=Drosophila melanogaster GN=AlstR PE=2 SV=1	146	-21.17	146	-21.17	24	1629	207	P	GO:0007417	central nervous system development
spu-miR-2005	comp10116_c0_seq2	Q9U721_DROME	Q9U721_DROME Allatostatin receptor OS=Drosophila melanogaster GN=AlstR PE=2 SV=1	146	-21.17	146	-21.17	24	1629	207	P	GO:0048513	organ development
spu-miR-2005	comp10116_c0_seq2	Q9U721_DROME	Q9U721_DROME Allatostatin receptor OS=Drosophila melanogaster GN=AlstR PE=2 SV=1	146	-21.17	146	-21.17	24	1629	207	F	GO:0008188	neuropeptide receptor activity
spu-miR-2005	comp10116_c0_seq2	Q9U721_DROME	Q9U721_DROME Allatostatin receptor OS=Drosophila melanogaster GN=AlstR PE=2 SV=1	146	-21.17	146	-21.17	24	1629	207	P	GO:0007187	G-protein coupled receptor signaling pathway, coupled to cyclic nucleotide second messenger
spu-miR-2005	comp10116_c0_seq2	Q9U721_DROME	Q9U721_DROME Allatostatin receptor OS=Drosophila melanogaster GN=AlstR PE=2 SV=1	146	-21.17	146	-21.17	24	1629	207	P	GO:0007268	synaptic transmission
spu-miR-2013	comp10116_c0_seq2	Q9U721_DROME	Q9U721_DROME Allatostatin receptor OS=Drosophila melanogaster GN=AlstR PE=2 SV=1	145	-19.4	145	-19.4	21	1629	1383	C	GO:0016020	membrane
spu-miR-2013	comp10116_c0_seq2	Q9U721_DROME	Q9U721_DROME Allatostatin receptor OS=Drosophila melanogaster GN=AlstR PE=2 SV=1	145	-19.4	145	-19.4	21	1629	1383	P	GO:0007417	central nervous system development
spu-miR-2013	comp10116_c0_seq2	Q9U721_DROME	Q9U721_DROME Allatostatin receptor OS=Drosophila melanogaster GN=AlstR PE=2 SV=1	145	-19.4	145	-19.4	21	1629	1383	P	GO:0048513	organ development
spu-miR-2013	comp10116_c0_seq2	Q9U721_DROME	Q9U721_DROME Allatostatin receptor OS=Drosophila melanogaster GN=AlstR PE=2 SV=1	145	-19.4	145	-19.4	21	1629	1383	F	GO:0008188	neuropeptide receptor activity
spu-miR-2013	comp10116_c0_seq2	Q9U721_DROME	Q9U721_DROME Allatostatin receptor OS=Drosophila melanogaster GN=AlstR PE=2 SV=1	145	-19.4	145	-19.4	21	1629	1383	P	GO:0007187	G-protein coupled receptor signaling pathway, coupled to cyclic nucleotide second messenger
spu-miR-2013	comp10116_c0_seq2	Q9U721_DROME	Q9U721_DROME Allatostatin receptor OS=Drosophila melanogaster GN=AlstR PE=2 SV=1	145	-19.4	145	-19.4	21	1629	1383	P	GO:0007268	synaptic transmission
spu-miR-2008	comp10116_c0_seq2	Q9U721_DROME	Q9U721_DROME Allatostatin receptor OS=Drosophila melanogaster GN=AlstR PE=2 SV=1	303	-36.35	154	-18.43	21	1629	867 97	C	GO:0016020	membrane
spu-miR-2008	comp10116_c0_seq2	Q9U721_DROME	Q9U721_DROME Allatostatin receptor OS=Drosophila melanogaster GN=AlstR PE=2 SV=1	303	-36.35	154	-18.43	21	1629	867 97	P	GO:0007417	central nervous system development
spu-miR-2008	comp10116_c0_seq2	Q9U721_DROME	Q9U721_DROME Allatostatin receptor OS=Drosophila melanogaster GN=AlstR PE=2 SV=1	303	-36.35	154	-18.43	21	1629	867 97	P	GO:0048513	organ development
spu-miR-2008	comp10116_c0_seq2	Q9U721_DROME	Q9U721_DROME Allatostatin receptor OS=Drosophila melanogaster GN=AlstR PE=2 SV=1	303	-36.35	154	-18.43	21	1629	867 97	F	GO:0008188	neuropeptide receptor activity
spu-miR-2008	comp10116_c0_seq2	Q9U721_DROME	Q9U721_DROME Allatostatin receptor OS=Drosophila melanogaster GN=AlstR PE=2 SV=1	303	-36.35	154	-18.43	21	1629	867 97	P	GO:0007187	G-protein coupled receptor signaling pathway, coupled to cyclic nucleotide second messenger
spu-miR-2008	comp10116_c0_seq2	Q9U721_DROME	Q9U721_DROME Allatostatin receptor OS=Drosophila melanogaster GN=AlstR PE=2 SV=1	303	-36.35	154	-18.43	21	1629	867 97	P	GO:0007268	synaptic transmission
spu-miR-4853	comp10116_c0_seq2	Q9U721_DROME	Q9U721_DROME Allatostatin receptor OS=Drosophila melanogaster GN=AlstR PE=2 SV=1	147	-17.93	147	-17.93	24	1629	124	C	GO:0016020	membrane
spu-miR-4853	comp10116_c0_seq2	Q9U721_DROME	Q9U721_DROME Allatostatin receptor OS=Drosophila melanogaster GN=AlstR PE=2 SV=1	147	-17.93	147	-17.93	24	1629	124	P	GO:0007417	central nervous system development
spu-miR-4853	comp10116_c0_seq2	Q9U721_DROME	Q9U721_DROME Allatostatin receptor OS=Drosophila melanogaster GN=AlstR PE=2 SV=1	147	-17.93	147	-17.93	24	1629	124	P	GO:0048513	organ development
spu-miR-4853	comp10116_c0_seq2	Q9U721_DROME	Q9U721_DROME Allatostatin receptor OS=Drosophila melanogaster GN=AlstR PE=2 SV=1	147	-17.93	147	-17.93	24	1629	124	F	GO:0008188	neuropeptide receptor activity
spu-miR-4853	comp10116_c0_seq2	Q9U721_DROME	Q9U721_DROME Allatostatin receptor OS=Drosophila melanogaster GN=AlstR PE=2 SV=1	147	-17.93	147	-17.93	24	1629	124	P	GO:0007187	G-protein coupled receptor signaling pathway, coupled to cyclic nucleotide second messenger
spu-miR-4853	comp10116_c0_seq2	Q9U721_DROME	Q9U721_DROME Allatostatin receptor OS=Drosophila melanogaster GN=AlstR PE=2 SV=1	147	-17.93	147	-17.93	24	1629	124	P	GO:0007268	synaptic transmission
spu-miR-375	comp10116_c0_seq2	Q9U721_DROME	Q9U721_DROME Allatostatin receptor OS=Drosophila melanogaster GN=AlstR PE=2 SV=1	144	-19.76	144	-19.76	22	1629	572	C	GO:0016020	membrane
spu-miR-375	comp10116_c0_seq2	Q9U721_DROME	Q9U721_DROME Allatostatin receptor OS=Drosophila melanogaster GN=AlstR PE=2 SV=1	144	-19.76	144	-19.76	22	1629	572	P	GO:0007417	central nervous system development
spu-miR-375	comp10116_c0_seq2	Q9U721_DROME	Q9U721_DROME Allatostatin receptor OS=Drosophila melanogaster GN=AlstR PE=2 SV=1	144	-19.76	144	-19.76	22	1629	572	P	GO:0048513	organ development
spu-miR-375	comp10116_c0_seq2	Q9U721_DROME	Q9U721_DROME Allatostatin receptor OS=Drosophila melanogaster GN=AlstR PE=2 SV=1	144	-19.76	144	-19.76	22	1629	572	F	GO:0008188	neuropeptide receptor activity
spu-miR-375	comp10116_c0_seq2	Q9U721_DROME	Q9U721_DROME Allatostatin receptor OS=Drosophila melanogaster GN=AlstR PE=2 SV=1	144	-19.76	144	-19.76	22	1629	572	P	GO:0007187	G-protein coupled receptor signaling pathway, coupled to cyclic nucleotide second messenger
spu-miR-375	comp10116_c0_seq2	Q9U721_DROME	Q9U721_DROME Allatostatin receptor OS=Drosophila melanogaster GN=AlstR PE=2 SV=1	144	-19.76	144	-19.76	22	1629	572	P	GO:0007268	synaptic transmission
spu-miR-7	comp10116_c0_seq2	Q9U721_DROME	Q9U721_DROME Allatostatin receptor OS=Drosophila melanogaster GN=AlstR PE=2 SV=1	148	-20.46	148	-20.46	23	1629	308	C	GO:0016020	membrane
spu-miR-7	comp10116_c0_seq2	Q9U721_DROME	Q9U721_DROME Allatostatin receptor OS=Drosophila melanogaster GN=AlstR PE=2 SV=1	148	-20.46	148	-20.46	23	1629	308	P	GO:0007417	central nervous system development
spu-miR-7	comp10116_c0_seq2	Q9U721_DROME	Q9U721_DROME Allatostatin receptor OS=Drosophila melanogaster GN=AlstR PE=2 SV=1	148	-20.46	148	-20.46	23	1629	308	P	GO:0048513	organ development
spu-miR-7	comp10116_c0_seq2	Q9U721_DROME	Q9U721_DROME Allatostatin receptor OS=Drosophila melanogaster GN=AlstR PE=2 SV=1	148	-20.46	148	-20.46	23	1629	308	F	GO:0008188	neuropeptide receptor activity
spu-miR-7	comp10116_c0_seq2	Q9U721_DROME	Q9U721_DROME Allatostatin receptor OS=Drosophila melanogaster GN=AlstR PE=2 SV=1	148	-20.46	148	-20.46	23	1629	308	P	GO:0007187	G-protein coupled receptor signaling pathway, coupled to cyclic nucleotide second messenger
spu-miR-7	comp10116_c0_seq2	Q9U721_DROME	Q9U721_DROME Allatostatin receptor OS=Drosophila melanogaster GN=AlstR PE=2 SV=1	148	-20.46	148	-20.46	23	1629	308	P	GO:0007268	synaptic transmission
spu-miR-4847	comp10116_c0_seq2	Q9U721_DROME	Q9U721_DROME Allatostatin receptor OS=Drosophila melanogaster GN=AlstR PE=2 SV=1	153	-23.96	153	-23.96	22	1629	475	C	GO:0016020	membrane
spu-miR-4847	comp10116_c0_seq2	Q9U721_DROME	Q9U721_DROME Allatostatin receptor OS=Drosophila melanogaster GN=AlstR PE=2 SV=1	153	-23.96	153	-23.96	22	1629	475	P	GO:0007417	central nervous system development
spu-miR-4847	comp10116_c0_seq2	Q9U721_DROME	Q9U721_DROME Allatostatin receptor OS=Drosophila melanogaster GN=AlstR PE=2 SV=1	153	-23.96	153	-23.96	22	1629	475	P	GO:0048513	organ development
spu-miR-4847	comp10116_c0_seq2	Q9U721_DROME	Q9U721_DROME Allatostatin receptor OS=Drosophila melanogaster GN=AlstR PE=2 SV=1	153	-23.96	153	-23.96	22	1629	475	F	GO:0008188	neuropeptide receptor activity
spu-miR-4847	comp10116_c0_seq2	Q9U721_DROME	Q9U721_DROME Allatostatin receptor OS=Drosophila melanogaster GN=AlstR PE=2 SV=1	153	-23.96	153	-23.96	22	1629	475	P	GO:0007187	G-protein coupled receptor signaling pathway, coupled to cyclic nucleotide second messenger
spu-miR-4847	comp10116_c0_seq2	Q9U721_DROME	Q9U721_DROME Allatostatin receptor OS=Drosophila melanogaster GN=AlstR PE=2 SV=1	153	-23.96	153	-23.96	22	1629	475	P	GO:0007268	synaptic transmission
spu-miR-200	comp10116_c0_seq2	Q9U721_DROME	Q9U721_DROME Allatostatin receptor OS=Drosophila melanogaster GN=AlstR PE=2 SV=1	140	-20.02	140	-20.02	23	1629	1525	C	GO:0016020	membrane
spu-miR-200	comp10116_c0_seq2	Q9U721_DROME	Q9U721_DROME Allatostatin receptor OS=Drosophila melanogaster GN=AlstR PE=2 SV=1	140	-20.02	140	-20.02	23	1629	1525	P	GO:0007417	central nervous system development
spu-miR-200	comp10116_c0_seq2	Q9U721_DROME	Q9U721_DROME Allatostatin receptor OS=Drosophila melanogaster GN=AlstR PE=2 SV=1	140	-20.02	140	-20.02	23	1629	1525	P	GO:0048513	organ development
spu-miR-200	comp10116_c0_seq2	Q9U721_DROME	Q9U721_DROME Allatostatin receptor OS=Drosophila melanogaster GN=AlstR PE=2 SV=1	140	-20.02	140	-20.02	23	1629	1525	F	GO:0008188	neuropeptide receptor activity
spu-miR-200	comp10116_c0_seq2	Q9U721_DROME	Q9U721_DROME Allatostatin receptor OS=Drosophila melanogaster GN=AlstR PE=2 SV=1	140	-20.02	140	-20.02	23	1629	1525	P	GO:0007187	G-protein coupled receptor signaling pathway, coupled to cyclic nucleotide second messenger
spu-miR-200	comp10116_c0_seq2	Q9U721_DROME	Q9U721_DROME Allatostatin receptor OS=Drosophila melanogaster GN=AlstR PE=2 SV=1	140	-20.02	140	-20.02	23	1629	1525	P	GO:0007268	synaptic transmission
spu-miR-4854	comp10116_c0_seq2	Q9U721_DROME	Q9U721_DROME Allatostatin receptor OS=Drosophila melanogaster GN=AlstR PE=2 SV=1	144	-21.49	144	-21.49	22	1629	1454	C	GO:0016020	membrane
spu-miR-4854	comp10116_c0_seq2	Q9U721_DROME	Q9U721_DROME Allatostatin receptor OS=Drosophila melanogaster GN=AlstR PE=2 SV=1	144	-21.49	144	-21.49	22	1629	1454	P	GO:0007417	central nervous system development
spu-miR-4854	comp10116_c0_seq2	Q9U721_DROME	Q9U721_DROME Allatostatin receptor OS=Drosophila melanogaster GN=AlstR PE=2 SV=1	144	-21.49	144	-21.49	22	1629	1454	P	GO:0048513	organ development
spu-miR-4854	comp10116_c0_seq2	Q9U721_DROME	Q9U721_DROME Allatostatin receptor OS=Drosophila melanogaster GN=AlstR PE=2 SV=1	144	-21.49	144	-21.49	22	1629	1454	F	GO:0008188	neuropeptide receptor activity
spu-miR-4854	comp10116_c0_seq2	Q9U721_DROME	Q9U721_DROME Allatostatin receptor OS=Drosophila melanogaster GN=AlstR PE=2 SV=1	144	-21.49	144	-21.49	22	1629	1454	P	GO:0007187	G-protein coupled receptor signaling pathway, coupled to cyclic nucleotide second messenger
spu-miR-4854	comp10116_c0_seq2	Q9U721_DROME	Q9U721_DROME Allatostatin receptor OS=Drosophila melanogaster GN=AlstR PE=2 SV=1	144	-21.49	144	-21.49	22	1629	1454	P	GO:0007268	synaptic transmission
spu-miR-34	comp10116_c0_seq2	Q9U721_DROME	Q9U721_DROME Allatostatin receptor OS=Drosophila melanogaster GN=AlstR PE=2 SV=1	148	-25.18	148	-25.18	22	1629	1020	C	GO:0016020	membrane
spu-miR-34	comp10116_c0_seq2	Q9U721_DROME	Q9U721_DROME Allatostatin receptor OS=Drosophila melanogaster GN=AlstR PE=2 SV=1	148	-25.18	148	-25.18	22	1629	1020	P	GO:0007417	central nervous system development
spu-miR-34	comp10116_c0_seq2	Q9U721_DROME	Q9U721_DROME Allatostatin receptor OS=Drosophila melanogaster GN=AlstR PE=2 SV=1	148	-25.18	148	-25.18	22	1629	1020	P	GO:0048513	organ development
spu-miR-34	comp10116_c0_seq2	Q9U721_DROME	Q9U721_DROME Allatostatin receptor OS=Drosophila melanogaster GN=AlstR PE=2 SV=1	148	-25.18	148	-25.18	22	1629	1020	F	GO:0008188	neuropeptide receptor activity
spu-miR-34	comp10116_c0_seq2	Q9U721_DROME	Q9U721_DROME Allatostatin receptor OS=Drosophila melanogaster GN=AlstR PE=2 SV=1	148	-25.18	148	-25.18	22	1629	1020	P	GO:0007187	G-protein coupled receptor signaling pathway, coupled to cyclic nucleotide second messenger
spu-miR-34	comp10116_c0_seq2	Q9U721_DROME	Q9U721_DROME Allatostatin receptor OS=Drosophila melanogaster GN=AlstR PE=2 SV=1	148	-25.18	148	-25.18	22	1629	1020	P	GO:0007268	synaptic transmission
spu-miR-Scaffold53378_527	comp10116_c0_seq2	Q9U721_DROME	Q9U721_DROME Allatostatin receptor OS=Drosophila melanogaster GN=AlstR PE=2 SV=1	142	-17.01	142	-17.01	24	1629	1218	C	GO:0016020	membrane
spu-miR-Scaffold53378_527	comp10116_c0_seq2	Q9U721_DROME	Q9U721_DROME Allatostatin receptor OS=Drosophila melanogaster GN=AlstR PE=2 SV=1	142	-17.01	142	-17.01	24	1629	1218	P	GO:0007417	central nervous system development
spu-miR-Scaffold53378_527	comp10116_c0_seq2	Q9U721_DROME	Q9U721_DROME Allatostatin receptor OS=Drosophila melanogaster GN=AlstR PE=2 SV=1	142	-17.01	142	-17.01	24	1629	1218	P	GO:0048513	organ development
spu-miR-Scaffold53378_527	comp10116_c0_seq2	Q9U721_DROME	Q9U721_DROME Allatostatin receptor OS=Drosophila melanogaster GN=AlstR PE=2 SV=1	142	-17.01	142	-17.01	24	1629	1218	F	GO:0008188	neuropeptide receptor activity
spu-miR-Scaffold53378_527	comp10116_c0_seq2	Q9U721_DROME	Q9U721_DROME Allatostatin receptor OS=Drosophila melanogaster GN=AlstR PE=2 SV=1	142	-17.01	142	-17.01	24	1629	1218	P	GO:0007187	G-protein coupled receptor signaling pathway, coupled to cyclic nucleotide second messenger
spu-miR-Scaffold53378_527	comp10116_c0_seq2	Q9U721_DROME	Q9U721_DROME Allatostatin receptor OS=Drosophila melanogaster GN=AlstR PE=2 SV=1	142	-17.01	142	-17.01	24	1629	1218	P	GO:0007268	synaptic transmission
spu-miR-Scaffold31389_1620	comp10116_c0_seq2	Q9U721_DROME	Q9U721_DROME Allatostatin receptor OS=Drosophila melanogaster GN=AlstR PE=2 SV=1	143	-30.1	143	-30.1	18	1629	661	C	GO:0016020	membrane
spu-miR-Scaffold31389_1620	comp10116_c0_seq2	Q9U721_DROME	Q9U721_DROME Allatostatin receptor OS=Drosophila melanogaster GN=AlstR PE=2 SV=1	143	-30.1	143	-30.1	18	1629	661	P	GO:0007417	central nervous system development
spu-miR-Scaffold31389_1620	comp10116_c0_seq2	Q9U721_DROME	Q9U721_DROME Allatostatin receptor OS=Drosophila melanogaster GN=AlstR PE=2 SV=1	143	-30.1	143	-30.1	18	1629	661	P	GO:0048513	organ development
spu-miR-Scaffold31389_1620	comp10116_c0_seq2	Q9U721_DROME	Q9U721_DROME Allatostatin receptor OS=Drosophila melanogaster GN=AlstR PE=2 SV=1	143	-30.1	143	-30.1	18	1629	661	F	GO:0008188	neuropeptide receptor activity
spu-miR-Scaffold31389_1620	comp10116_c0_seq2	Q9U721_DROME	Q9U721_DROME Allatostatin receptor OS=Drosophila melanogaster GN=AlstR PE=2 SV=1	143	-30.1	143	-30.1	18	1629	661	P	GO:0007187	G-protein coupled receptor signaling pathway, coupled to cyclic nucleotide second messenger
spu-miR-Scaffold31389_1620	comp10116_c0_seq2	Q9U721_DROME	Q9U721_DROME Allatostatin receptor OS=Drosophila melanogaster GN=AlstR PE=2 SV=1	143	-30.1	143	-30.1	18	1629	661	P	GO:0007268	synaptic transmission
spu-miR-184	comp10286_c0_seq1	GBP2_HUMAN	GBP2_HUMAN Interferon-induced guanylate-binding protein 2 OS=Homo sapiens GN=GBP2 PE=2 SV=3	149	-24.86	149	-24.86	22	409	345	P	GO:0050896	response to stimulus
spu-miR-184	comp10286_c0_seq1	GBP2_HUMAN	GBP2_HUMAN Interferon-induced guanylate-binding protein 2 OS=Homo sapiens GN=GBP2 PE=2 SV=3	149	-24.86	149	-24.86	22	409	345	C	GO:0044464	cell part
spu-miR-242	comp10286_c0_seq1	GBP2_HUMAN	GBP2_HUMAN Interferon-induced guanylate-binding protein 2 OS=Homo sapiens GN=GBP2 PE=2 SV=3	161	-21.68	161	-21.68	22	409	49	P	GO:0050896	response to stimulus
spu-miR-242	comp10286_c0_seq1	GBP2_HUMAN	GBP2_HUMAN Interferon-induced guanylate-binding protein 2 OS=Homo sapiens GN=GBP2 PE=2 SV=3	161	-21.68	161	-21.68	22	409	49	C	GO:0044464	cell part
spu-miR-2009	comp10360_c0_seq2	Q08CI9_DANRE	Q08CI9_DANRE Zgc:153034 OS=Danio rerio GN=zgc:153034 PE=2 SV=1	286	-26.28	143	-16.75	23	1442	150 1402	F	GO:0008757	S-adenosylmethionine-dependent methyltransferase activity
spu-miR-2009	comp10360_c0_seq2	Q08CI9_DANRE	Q08CI9_DANRE Zgc:153034 OS=Danio rerio GN=zgc:153034 PE=2 SV=1	286	-26.28	143	-16.75	23	1442	150 1402	P	GO:0009826	unidimensional cell growth
spu-miR-2009	comp10360_c0_seq2	Q08CI9_DANRE	Q08CI9_DANRE Zgc:153034 OS=Danio rerio GN=zgc:153034 PE=2 SV=1	286	-26.28	143	-16.75	23	1442	150 1402	P	GO:0006656	phosphatidylcholine biosynthetic process
spu-miR-2009	comp10360_c0_seq2	Q08CI9_DANRE	Q08CI9_DANRE Zgc:153034 OS=Danio rerio GN=zgc:153034 PE=2 SV=1	286	-26.28	143	-16.75	23	1442	150 1402	P	GO:0048868	pollen tube development
spu-miR-2009	comp10360_c0_seq2	Q08CI9_DANRE	Q08CI9_DANRE Zgc:153034 OS=Danio rerio GN=zgc:153034 PE=2 SV=1	286	-26.28	143	-16.75	23	1442	150 1402	F	GO:0052667	phosphomethylethanolamine N-methyltransferase activity
spu-miR-2009	comp10360_c0_seq2	Q08CI9_DANRE	Q08CI9_DANRE Zgc:153034 OS=Danio rerio GN=zgc:153034 PE=2 SV=1	286	-26.28	143	-16.75	23	1442	150 1402	C	GO:0044444	cytoplasmic part
spu-miR-2009	comp10360_c0_seq2	Q08CI9_DANRE	Q08CI9_DANRE Zgc:153034 OS=Danio rerio GN=zgc:153034 PE=2 SV=1	286	-26.28	143	-16.75	23	1442	150 1402	P	GO:0009791	post-embryonic development
spu-miR-2010	comp10360_c0_seq2	Q08CI9_DANRE	Q08CI9_DANRE Zgc:153034 OS=Danio rerio GN=zgc:153034 PE=2 SV=1	284	-28.83	143	-14.66	22	1442	177 801	F	GO:0008757	S-adenosylmethionine-dependent methyltransferase activity
spu-miR-2010	comp10360_c0_seq2	Q08CI9_DANRE	Q08CI9_DANRE Zgc:153034 OS=Danio rerio GN=zgc:153034 PE=2 SV=1	284	-28.83	143	-14.66	22	1442	177 801	P	GO:0009826	unidimensional cell growth
spu-miR-2010	comp10360_c0_seq2	Q08CI9_DANRE	Q08CI9_DANRE Zgc:153034 OS=Danio rerio GN=zgc:153034 PE=2 SV=1	284	-28.83	143	-14.66	22	1442	177 801	P	GO:0006656	phosphatidylcholine biosynthetic process
spu-miR-2010	comp10360_c0_seq2	Q08CI9_DANRE	Q08CI9_DANRE Zgc:153034 OS=Danio rerio GN=zgc:153034 PE=2 SV=1	284	-28.83	143	-14.66	22	1442	177 801	P	GO:0048868	pollen tube development
spu-miR-2010	comp10360_c0_seq2	Q08CI9_DANRE	Q08CI9_DANRE Zgc:153034 OS=Danio rerio GN=zgc:153034 PE=2 SV=1	284	-28.83	143	-14.66	22	1442	177 801	F	GO:0052667	phosphomethylethanolamine N-methyltransferase activity
spu-miR-2010	comp10360_c0_seq2	Q08CI9_DANRE	Q08CI9_DANRE Zgc:153034 OS=Danio rerio GN=zgc:153034 PE=2 SV=1	284	-28.83	143	-14.66	22	1442	177 801	C	GO:0044444	cytoplasmic part
spu-miR-2010	comp10360_c0_seq2	Q08CI9_DANRE	Q08CI9_DANRE Zgc:153034 OS=Danio rerio GN=zgc:153034 PE=2 SV=1	284	-28.83	143	-14.66	22	1442	177 801	P	GO:0009791	post-embryonic development
spu-miR-2012	comp10360_c0_seq2	Q08CI9_DANRE	Q08CI9_DANRE Zgc:153034 OS=Danio rerio GN=zgc:153034 PE=2 SV=1	146	-20.65	146	-20.65	22	1442	290	F	GO:0008757	S-adenosylmethionine-dependent methyltransferase activity
spu-miR-2012	comp10360_c0_seq2	Q08CI9_DANRE	Q08CI9_DANRE Zgc:153034 OS=Danio rerio GN=zgc:153034 PE=2 SV=1	146	-20.65	146	-20.65	22	1442	290	P	GO:0009826	unidimensional cell growth
spu-miR-2012	comp10360_c0_seq2	Q08CI9_DANRE	Q08CI9_DANRE Zgc:153034 OS=Danio rerio GN=zgc:153034 PE=2 SV=1	146	-20.65	146	-20.65	22	1442	290	P	GO:0006656	phosphatidylcholine biosynthetic process
spu-miR-2012	comp10360_c0_seq2	Q08CI9_DANRE	Q08CI9_DANRE Zgc:153034 OS=Danio rerio GN=zgc:153034 PE=2 SV=1	146	-20.65	146	-20.65	22	1442	290	P	GO:0048868	pollen tube development
spu-miR-2012	comp10360_c0_seq2	Q08CI9_DANRE	Q08CI9_DANRE Zgc:153034 OS=Danio rerio GN=zgc:153034 PE=2 SV=1	146	-20.65	146	-20.65	22	1442	290	F	GO:0052667	phosphomethylethanolamine N-methyltransferase activity
spu-miR-2012	comp10360_c0_seq2	Q08CI9_DANRE	Q08CI9_DANRE Zgc:153034 OS=Danio rerio GN=zgc:153034 PE=2 SV=1	146	-20.65	146	-20.65	22	1442	290	C	GO:0044444	cytoplasmic part
spu-miR-2012	comp10360_c0_seq2	Q08CI9_DANRE	Q08CI9_DANRE Zgc:153034 OS=Danio rerio GN=zgc:153034 PE=2 SV=1	146	-20.65	146	-20.65	22	1442	290	P	GO:0009791	post-embryonic development
spu-miR-2007	comp10360_c0_seq2	Q08CI9_DANRE	Q08CI9_DANRE Zgc:153034 OS=Danio rerio GN=zgc:153034 PE=2 SV=1	285	-32.75	145	-19.28	23	1442	348 950	F	GO:0008757	S-adenosylmethionine-dependent methyltransferase activity
spu-miR-2007	comp10360_c0_seq2	Q08CI9_DANRE	Q08CI9_DANRE Zgc:153034 OS=Danio rerio GN=zgc:153034 PE=2 SV=1	285	-32.75	145	-19.28	23	1442	348 950	P	GO:0009826	unidimensional cell growth
spu-miR-2007	comp10360_c0_seq2	Q08CI9_DANRE	Q08CI9_DANRE Zgc:153034 OS=Danio rerio GN=zgc:153034 PE=2 SV=1	285	-32.75	145	-19.28	23	1442	348 950	P	GO:0006656	phosphatidylcholine biosynthetic process
spu-miR-2007	comp10360_c0_seq2	Q08CI9_DANRE	Q08CI9_DANRE Zgc:153034 OS=Danio rerio GN=zgc:153034 PE=2 SV=1	285	-32.75	145	-19.28	23	1442	348 950	P	GO:0048868	pollen tube development
spu-miR-2007	comp10360_c0_seq2	Q08CI9_DANRE	Q08CI9_DANRE Zgc:153034 OS=Danio rerio GN=zgc:153034 PE=2 SV=1	285	-32.75	145	-19.28	23	1442	348 950	F	GO:0052667	phosphomethylethanolamine N-methyltransferase activity
spu-miR-2007	comp10360_c0_seq2	Q08CI9_DANRE	Q08CI9_DANRE Zgc:153034 OS=Danio rerio GN=zgc:153034 PE=2 SV=1	285	-32.75	145	-19.28	23	1442	348 950	C	GO:0044444	cytoplasmic part
spu-miR-2007	comp10360_c0_seq2	Q08CI9_DANRE	Q08CI9_DANRE Zgc:153034 OS=Danio rerio GN=zgc:153034 PE=2 SV=1	285	-32.75	145	-19.28	23	1442	348 950	P	GO:0009791	post-embryonic development
spu-miR-242	comp10360_c0_seq2	Q08CI9_DANRE	Q08CI9_DANRE Zgc:153034 OS=Danio rerio GN=zgc:153034 PE=2 SV=1	149	-20.95	149	-20.95	22	1442	852	F	GO:0008757	S-adenosylmethionine-dependent methyltransferase activity
spu-miR-242	comp10360_c0_seq2	Q08CI9_DANRE	Q08CI9_DANRE Zgc:153034 OS=Danio rerio GN=zgc:153034 PE=2 SV=1	149	-20.95	149	-20.95	22	1442	852	P	GO:0009826	unidimensional cell growth
spu-miR-242	comp10360_c0_seq2	Q08CI9_DANRE	Q08CI9_DANRE Zgc:153034 OS=Danio rerio GN=zgc:153034 PE=2 SV=1	149	-20.95	149	-20.95	22	1442	852	P	GO:0006656	phosphatidylcholine biosynthetic process
spu-miR-242	comp10360_c0_seq2	Q08CI9_DANRE	Q08CI9_DANRE Zgc:153034 OS=Danio rerio GN=zgc:153034 PE=2 SV=1	149	-20.95	149	-20.95	22	1442	852	P	GO:0048868	pollen tube development
spu-miR-242	comp10360_c0_seq2	Q08CI9_DANRE	Q08CI9_DANRE Zgc:153034 OS=Danio rerio GN=zgc:153034 PE=2 SV=1	149	-20.95	149	-20.95	22	1442	852	F	GO:0052667	phosphomethylethanolamine N-methyltransferase activity
spu-miR-242	comp10360_c0_seq2	Q08CI9_DANRE	Q08CI9_DANRE Zgc:153034 OS=Danio rerio GN=zgc:153034 PE=2 SV=1	149	-20.95	149	-20.95	22	1442	852	C	GO:0044444	cytoplasmic part
spu-miR-242	comp10360_c0_seq2	Q08CI9_DANRE	Q08CI9_DANRE Zgc:153034 OS=Danio rerio GN=zgc:153034 PE=2 SV=1	149	-20.95	149	-20.95	22	1442	852	P	GO:0009791	post-embryonic development
spu-miR-4847	comp10360_c0_seq2	Q08CI9_DANRE	Q08CI9_DANRE Zgc:153034 OS=Danio rerio GN=zgc:153034 PE=2 SV=1	292	-31.21	152	-16.19	22	1442	1032 1286	F	GO:0008757	S-adenosylmethionine-dependent methyltransferase activity
spu-miR-4847	comp10360_c0_seq2	Q08CI9_DANRE	Q08CI9_DANRE Zgc:153034 OS=Danio rerio GN=zgc:153034 PE=2 SV=1	292	-31.21	152	-16.19	22	1442	1032 1286	P	GO:0009826	unidimensional cell growth
spu-miR-4847	comp10360_c0_seq2	Q08CI9_DANRE	Q08CI9_DANRE Zgc:153034 OS=Danio rerio GN=zgc:153034 PE=2 SV=1	292	-31.21	152	-16.19	22	1442	1032 1286	P	GO:0006656	phosphatidylcholine biosynthetic process
spu-miR-4847	comp10360_c0_seq2	Q08CI9_DANRE	Q08CI9_DANRE Zgc:153034 OS=Danio rerio GN=zgc:153034 PE=2 SV=1	292	-31.21	152	-16.19	22	1442	1032 1286	P	GO:0048868	pollen tube development
spu-miR-4847	comp10360_c0_seq2	Q08CI9_DANRE	Q08CI9_DANRE Zgc:153034 OS=Danio rerio GN=zgc:153034 PE=2 SV=1	292	-31.21	152	-16.19	22	1442	1032 1286	F	GO:0052667	phosphomethylethanolamine N-methyltransferase activity
spu-miR-4847	comp10360_c0_seq2	Q08CI9_DANRE	Q08CI9_DANRE Zgc:153034 OS=Danio rerio GN=zgc:153034 PE=2 SV=1	292	-31.21	152	-16.19	22	1442	1032 1286	C	GO:0044444	cytoplasmic part
spu-miR-4847	comp10360_c0_seq2	Q08CI9_DANRE	Q08CI9_DANRE Zgc:153034 OS=Danio rerio GN=zgc:153034 PE=2 SV=1	292	-31.21	152	-16.19	22	1442	1032 1286	P	GO:0009791	post-embryonic development
spu-miR-4850	comp10360_c0_seq2	Q08CI9_DANRE	Q08CI9_DANRE Zgc:153034 OS=Danio rerio GN=zgc:153034 PE=2 SV=1	151	-19.58	151	-19.58	23	1442	626	F	GO:0008757	S-adenosylmethionine-dependent methyltransferase activity
spu-miR-4850	comp10360_c0_seq2	Q08CI9_DANRE	Q08CI9_DANRE Zgc:153034 OS=Danio rerio GN=zgc:153034 PE=2 SV=1	151	-19.58	151	-19.58	23	1442	626	P	GO:0009826	unidimensional cell growth
spu-miR-4850	comp10360_c0_seq2	Q08CI9_DANRE	Q08CI9_DANRE Zgc:153034 OS=Danio rerio GN=zgc:153034 PE=2 SV=1	151	-19.58	151	-19.58	23	1442	626	P	GO:0006656	phosphatidylcholine biosynthetic process
spu-miR-4850	comp10360_c0_seq2	Q08CI9_DANRE	Q08CI9_DANRE Zgc:153034 OS=Danio rerio GN=zgc:153034 PE=2 SV=1	151	-19.58	151	-19.58	23	1442	626	P	GO:0048868	pollen tube development
spu-miR-4850	comp10360_c0_seq2	Q08CI9_DANRE	Q08CI9_DANRE Zgc:153034 OS=Danio rerio GN=zgc:153034 PE=2 SV=1	151	-19.58	151	-19.58	23	1442	626	F	GO:0052667	phosphomethylethanolamine N-methyltransferase activity
spu-miR-4850	comp10360_c0_seq2	Q08CI9_DANRE	Q08CI9_DANRE Zgc:153034 OS=Danio rerio GN=zgc:153034 PE=2 SV=1	151	-19.58	151	-19.58	23	1442	626	C	GO:0044444	cytoplasmic part
spu-miR-4850	comp10360_c0_seq2	Q08CI9_DANRE	Q08CI9_DANRE Zgc:153034 OS=Danio rerio GN=zgc:153034 PE=2 SV=1	151	-19.58	151	-19.58	23	1442	626	P	GO:0009791	post-embryonic development
spu-miR-Scaffold36370_15	comp10360_c0_seq2	Q08CI9_DANRE	Q08CI9_DANRE Zgc:153034 OS=Danio rerio GN=zgc:153034 PE=2 SV=1	170	-29.33	170	-29.33	21	1442	1097	F	GO:0008757	S-adenosylmethionine-dependent methyltransferase activity
spu-miR-Scaffold36370_15	comp10360_c0_seq2	Q08CI9_DANRE	Q08CI9_DANRE Zgc:153034 OS=Danio rerio GN=zgc:153034 PE=2 SV=1	170	-29.33	170	-29.33	21	1442	1097	P	GO:0009826	unidimensional cell growth
spu-miR-Scaffold36370_15	comp10360_c0_seq2	Q08CI9_DANRE	Q08CI9_DANRE Zgc:153034 OS=Danio rerio GN=zgc:153034 PE=2 SV=1	170	-29.33	170	-29.33	21	1442	1097	P	GO:0006656	phosphatidylcholine biosynthetic process
spu-miR-Scaffold36370_15	comp10360_c0_seq2	Q08CI9_DANRE	Q08CI9_DANRE Zgc:153034 OS=Danio rerio GN=zgc:153034 PE=2 SV=1	170	-29.33	170	-29.33	21	1442	1097	P	GO:0048868	pollen tube development
spu-miR-Scaffold36370_15	comp10360_c0_seq2	Q08CI9_DANRE	Q08CI9_DANRE Zgc:153034 OS=Danio rerio GN=zgc:153034 PE=2 SV=1	170	-29.33	170	-29.33	21	1442	1097	F	GO:0052667	phosphomethylethanolamine N-methyltransferase activity
spu-miR-Scaffold36370_15	comp10360_c0_seq2	Q08CI9_DANRE	Q08CI9_DANRE Zgc:153034 OS=Danio rerio GN=zgc:153034 PE=2 SV=1	170	-29.33	170	-29.33	21	1442	1097	C	GO:0044444	cytoplasmic part
spu-miR-Scaffold36370_15	comp10360_c0_seq2	Q08CI9_DANRE	Q08CI9_DANRE Zgc:153034 OS=Danio rerio GN=zgc:153034 PE=2 SV=1	170	-29.33	170	-29.33	21	1442	1097	P	GO:0009791	post-embryonic development
spu-miR-Scaffold36370_25	comp10360_c0_seq2	Q08CI9_DANRE	Q08CI9_DANRE Zgc:153034 OS=Danio rerio GN=zgc:153034 PE=2 SV=1	165	-29.33	165	-29.33	20	1442	1098	F	GO:0008757	S-adenosylmethionine-dependent methyltransferase activity
spu-miR-Scaffold36370_25	comp10360_c0_seq2	Q08CI9_DANRE	Q08CI9_DANRE Zgc:153034 OS=Danio rerio GN=zgc:153034 PE=2 SV=1	165	-29.33	165	-29.33	20	1442	1098	P	GO:0009826	unidimensional cell growth
spu-miR-Scaffold36370_25	comp10360_c0_seq2	Q08CI9_DANRE	Q08CI9_DANRE Zgc:153034 OS=Danio rerio GN=zgc:153034 PE=2 SV=1	165	-29.33	165	-29.33	20	1442	1098	P	GO:0006656	phosphatidylcholine biosynthetic process
spu-miR-Scaffold36370_25	comp10360_c0_seq2	Q08CI9_DANRE	Q08CI9_DANRE Zgc:153034 OS=Danio rerio GN=zgc:153034 PE=2 SV=1	165	-29.33	165	-29.33	20	1442	1098	P	GO:0048868	pollen tube development
spu-miR-Scaffold36370_25	comp10360_c0_seq2	Q08CI9_DANRE	Q08CI9_DANRE Zgc:153034 OS=Danio rerio GN=zgc:153034 PE=2 SV=1	165	-29.33	165	-29.33	20	1442	1098	F	GO:0052667	phosphomethylethanolamine N-methyltransferase activity
spu-miR-Scaffold36370_25	comp10360_c0_seq2	Q08CI9_DANRE	Q08CI9_DANRE Zgc:153034 OS=Danio rerio GN=zgc:153034 PE=2 SV=1	165	-29.33	165	-29.33	20	1442	1098	C	GO:0044444	cytoplasmic part
spu-miR-Scaffold36370_25	comp10360_c0_seq2	Q08CI9_DANRE	Q08CI9_DANRE Zgc:153034 OS=Danio rerio GN=zgc:153034 PE=2 SV=1	165	-29.33	165	-29.33	20	1442	1098	P	GO:0009791	post-embryonic development
spu-miR-Scaffold54271_281	comp10360_c0_seq2	Q08CI9_DANRE	Q08CI9_DANRE Zgc:153034 OS=Danio rerio GN=zgc:153034 PE=2 SV=1	291	-23	150	-13.18	19	1442	1348 1034	F	GO:0008757	S-adenosylmethionine-dependent methyltransferase activity
spu-miR-Scaffold54271_281	comp10360_c0_seq2	Q08CI9_DANRE	Q08CI9_DANRE Zgc:153034 OS=Danio rerio GN=zgc:153034 PE=2 SV=1	291	-23	150	-13.18	19	1442	1348 1034	P	GO:0009826	unidimensional cell growth
spu-miR-Scaffold54271_281	comp10360_c0_seq2	Q08CI9_DANRE	Q08CI9_DANRE Zgc:153034 OS=Danio rerio GN=zgc:153034 PE=2 SV=1	291	-23	150	-13.18	19	1442	1348 1034	P	GO:0006656	phosphatidylcholine biosynthetic process
spu-miR-Scaffold54271_281	comp10360_c0_seq2	Q08CI9_DANRE	Q08CI9_DANRE Zgc:153034 OS=Danio rerio GN=zgc:153034 PE=2 SV=1	291	-23	150	-13.18	19	1442	1348 1034	P	GO:0048868	pollen tube development
spu-miR-Scaffold54271_281	comp10360_c0_seq2	Q08CI9_DANRE	Q08CI9_DANRE Zgc:153034 OS=Danio rerio GN=zgc:153034 PE=2 SV=1	291	-23	150	-13.18	19	1442	1348 1034	F	GO:0052667	phosphomethylethanolamine N-methyltransferase activity
spu-miR-Scaffold54271_281	comp10360_c0_seq2	Q08CI9_DANRE	Q08CI9_DANRE Zgc:153034 OS=Danio rerio GN=zgc:153034 PE=2 SV=1	291	-23	150	-13.18	19	1442	1348 1034	C	GO:0044444	cytoplasmic part
spu-miR-Scaffold54271_281	comp10360_c0_seq2	Q08CI9_DANRE	Q08CI9_DANRE Zgc:153034 OS=Danio rerio GN=zgc:153034 PE=2 SV=1	291	-23	150	-13.18	19	1442	1348 1034	P	GO:0009791	post-embryonic development
spu-miR-79	comp104210_c0_seq1	VATF_HUMAN	VATF_HUMAN V-type proton ATPase subunit F OS=Homo sapiens GN=ATP6V1F PE=1 SV=2	142	-17.08	142	-17.08	22	394	216	C	GO:0005886	plasma membrane
spu-miR-79	comp104210_c0_seq1	VATF_HUMAN	VATF_HUMAN V-type proton ATPase subunit F OS=Homo sapiens GN=ATP6V1F PE=1 SV=2	142	-17.08	142	-17.08	22	394	216	P	GO:0006879	cellular iron ion homeostasis
spu-miR-79	comp104210_c0_seq1	VATF_HUMAN	VATF_HUMAN V-type proton ATPase subunit F OS=Homo sapiens GN=ATP6V1F PE=1 SV=2	142	-17.08	142	-17.08	22	394	216	P	GO:0008286	insulin receptor signaling pathway
spu-miR-79	comp104210_c0_seq1	VATF_HUMAN	VATF_HUMAN V-type proton ATPase subunit F OS=Homo sapiens GN=ATP6V1F PE=1 SV=2	142	-17.08	142	-17.08	22	394	216	F	GO:0005515	protein binding
spu-miR-79	comp104210_c0_seq1	VATF_HUMAN	VATF_HUMAN V-type proton ATPase subunit F OS=Homo sapiens GN=ATP6V1F PE=1 SV=2	142	-17.08	142	-17.08	22	394	216	P	GO:0015992	proton transport
spu-miR-79	comp104210_c0_seq1	VATF_HUMAN	VATF_HUMAN V-type proton ATPase subunit F OS=Homo sapiens GN=ATP6V1F PE=1 SV=2	142	-17.08	142	-17.08	22	394	216	P	GO:0033572	transferrin transport
spu-miR-79	comp104210_c0_seq1	VATF_HUMAN	VATF_HUMAN V-type proton ATPase subunit F OS=Homo sapiens GN=ATP6V1F PE=1 SV=2	142	-17.08	142	-17.08	22	394	216	P	GO:0000003	reproduction
spu-miR-79	comp104210_c0_seq1	VATF_HUMAN	VATF_HUMAN V-type proton ATPase subunit F OS=Homo sapiens GN=ATP6V1F PE=1 SV=2	142	-17.08	142	-17.08	22	394	216	P	GO:0018996	molting cycle, collagen and cuticulin-based cuticle
spu-miR-79	comp104210_c0_seq1	VATF_HUMAN	VATF_HUMAN V-type proton ATPase subunit F OS=Homo sapiens GN=ATP6V1F PE=1 SV=2	142	-17.08	142	-17.08	22	394	216	C	GO:0005829	cytosol
spu-miR-79	comp104210_c0_seq1	VATF_HUMAN	VATF_HUMAN V-type proton ATPase subunit F OS=Homo sapiens GN=ATP6V1F PE=1 SV=2	142	-17.08	142	-17.08	22	394	216	P	GO:0040011	locomotion
spu-miR-79	comp104210_c0_seq1	VATF_HUMAN	VATF_HUMAN V-type proton ATPase subunit F OS=Homo sapiens GN=ATP6V1F PE=1 SV=2	142	-17.08	142	-17.08	22	394	216	P	GO:0055085	transmembrane transport
spu-miR-79	comp104210_c0_seq1	VATF_HUMAN	VATF_HUMAN V-type proton ATPase subunit F OS=Homo sapiens GN=ATP6V1F PE=1 SV=2	142	-17.08	142	-17.08	22	394	216	P	GO:0006898	receptor-mediated endocytosis
spu-miR-79	comp104210_c0_seq1	VATF_HUMAN	VATF_HUMAN V-type proton ATPase subunit F OS=Homo sapiens GN=ATP6V1F PE=1 SV=2	142	-17.08	142	-17.08	22	394	216	P	GO:0002119	nematode larval development
spu-miR-79	comp104210_c0_seq1	VATF_HUMAN	VATF_HUMAN V-type proton ATPase subunit F OS=Homo sapiens GN=ATP6V1F PE=1 SV=2	142	-17.08	142	-17.08	22	394	216	C	GO:0016471	vacuolar proton-transporting V-type ATPase complex
spu-miR-79	comp104210_c0_seq1	VATF_HUMAN	VATF_HUMAN V-type proton ATPase subunit F OS=Homo sapiens GN=ATP6V1F PE=1 SV=2	142	-17.08	142	-17.08	22	394	216	F	GO:0042625	ATPase activity, coupled to transmembrane movement of ions
spu-miR-79	comp104210_c0_seq1	VATF_HUMAN	VATF_HUMAN V-type proton ATPase subunit F OS=Homo sapiens GN=ATP6V1F PE=1 SV=2	142	-17.08	142	-17.08	22	394	216	F	GO:0015078	hydrogen ion transmembrane transporter activity
spu-miR-79	comp104210_c0_seq1	VATF_HUMAN	VATF_HUMAN V-type proton ATPase subunit F OS=Homo sapiens GN=ATP6V1F PE=1 SV=2	142	-17.08	142	-17.08	22	394	216	P	GO:0040007	growth
spu-miR-79	comp104210_c0_seq1	VATF_HUMAN	VATF_HUMAN V-type proton ATPase subunit F OS=Homo sapiens GN=ATP6V1F PE=1 SV=2	142	-17.08	142	-17.08	22	394	216	P	GO:0009792	embryo development ending in birth or egg hatching
spu-miR-4849	comp104210_c0_seq1	VATF_HUMAN	VATF_HUMAN V-type proton ATPase subunit F OS=Homo sapiens GN=ATP6V1F PE=1 SV=2	156	-20.66	156	-20.66	24	394	8	C	GO:0005886	plasma membrane
spu-miR-4849	comp104210_c0_seq1	VATF_HUMAN	VATF_HUMAN V-type proton ATPase subunit F OS=Homo sapiens GN=ATP6V1F PE=1 SV=2	156	-20.66	156	-20.66	24	394	8	P	GO:0006879	cellular iron ion homeostasis
spu-miR-4849	comp104210_c0_seq1	VATF_HUMAN	VATF_HUMAN V-type proton ATPase subunit F OS=Homo sapiens GN=ATP6V1F PE=1 SV=2	156	-20.66	156	-20.66	24	394	8	P	GO:0008286	insulin receptor signaling pathway
spu-miR-4849	comp104210_c0_seq1	VATF_HUMAN	VATF_HUMAN V-type proton ATPase subunit F OS=Homo sapiens GN=ATP6V1F PE=1 SV=2	156	-20.66	156	-20.66	24	394	8	F	GO:0005515	protein binding
spu-miR-4849	comp104210_c0_seq1	VATF_HUMAN	VATF_HUMAN V-type proton ATPase subunit F OS=Homo sapiens GN=ATP6V1F PE=1 SV=2	156	-20.66	156	-20.66	24	394	8	P	GO:0015992	proton transport
spu-miR-4849	comp104210_c0_seq1	VATF_HUMAN	VATF_HUMAN V-type proton ATPase subunit F OS=Homo sapiens GN=ATP6V1F PE=1 SV=2	156	-20.66	156	-20.66	24	394	8	P	GO:0033572	transferrin transport
spu-miR-4849	comp104210_c0_seq1	VATF_HUMAN	VATF_HUMAN V-type proton ATPase subunit F OS=Homo sapiens GN=ATP6V1F PE=1 SV=2	156	-20.66	156	-20.66	24	394	8	P	GO:0000003	reproduction
spu-miR-4849	comp104210_c0_seq1	VATF_HUMAN	VATF_HUMAN V-type proton ATPase subunit F OS=Homo sapiens GN=ATP6V1F PE=1 SV=2	156	-20.66	156	-20.66	24	394	8	P	GO:0018996	molting cycle, collagen and cuticulin-based cuticle
spu-miR-4849	comp104210_c0_seq1	VATF_HUMAN	VATF_HUMAN V-type proton ATPase subunit F OS=Homo sapiens GN=ATP6V1F PE=1 SV=2	156	-20.66	156	-20.66	24	394	8	C	GO:0005829	cytosol
spu-miR-4849	comp104210_c0_seq1	VATF_HUMAN	VATF_HUMAN V-type proton ATPase subunit F OS=Homo sapiens GN=ATP6V1F PE=1 SV=2	156	-20.66	156	-20.66	24	394	8	P	GO:0040011	locomotion
spu-miR-4849	comp104210_c0_seq1	VATF_HUMAN	VATF_HUMAN V-type proton ATPase subunit F OS=Homo sapiens GN=ATP6V1F PE=1 SV=2	156	-20.66	156	-20.66	24	394	8	P	GO:0055085	transmembrane transport
spu-miR-4849	comp104210_c0_seq1	VATF_HUMAN	VATF_HUMAN V-type proton ATPase subunit F OS=Homo sapiens GN=ATP6V1F PE=1 SV=2	156	-20.66	156	-20.66	24	394	8	P	GO:0006898	receptor-mediated endocytosis
spu-miR-4849	comp104210_c0_seq1	VATF_HUMAN	VATF_HUMAN V-type proton ATPase subunit F OS=Homo sapiens GN=ATP6V1F PE=1 SV=2	156	-20.66	156	-20.66	24	394	8	P	GO:0002119	nematode larval development
spu-miR-4849	comp104210_c0_seq1	VATF_HUMAN	VATF_HUMAN V-type proton ATPase subunit F OS=Homo sapiens GN=ATP6V1F PE=1 SV=2	156	-20.66	156	-20.66	24	394	8	C	GO:0016471	vacuolar proton-transporting V-type ATPase complex
spu-miR-4849	comp104210_c0_seq1	VATF_HUMAN	VATF_HUMAN V-type proton ATPase subunit F OS=Homo sapiens GN=ATP6V1F PE=1 SV=2	156	-20.66	156	-20.66	24	394	8	F	GO:0042625	ATPase activity, coupled to transmembrane movement of ions
spu-miR-4849	comp104210_c0_seq1	VATF_HUMAN	VATF_HUMAN V-type proton ATPase subunit F OS=Homo sapiens GN=ATP6V1F PE=1 SV=2	156	-20.66	156	-20.66	24	394	8	F	GO:0015078	hydrogen ion transmembrane transporter activity
spu-miR-4849	comp104210_c0_seq1	VATF_HUMAN	VATF_HUMAN V-type proton ATPase subunit F OS=Homo sapiens GN=ATP6V1F PE=1 SV=2	156	-20.66	156	-20.66	24	394	8	P	GO:0040007	growth
spu-miR-4849	comp104210_c0_seq1	VATF_HUMAN	VATF_HUMAN V-type proton ATPase subunit F OS=Homo sapiens GN=ATP6V1F PE=1 SV=2	156	-20.66	156	-20.66	24	394	8	P	GO:0009792	embryo development ending in birth or egg hatching
spu-miR-10	comp104210_c0_seq1	VATF_HUMAN	VATF_HUMAN V-type proton ATPase subunit F OS=Homo sapiens GN=ATP6V1F PE=1 SV=2	148	-22.25	148	-22.25	23	394	28	C	GO:0005886	plasma membrane
spu-miR-10	comp104210_c0_seq1	VATF_HUMAN	VATF_HUMAN V-type proton ATPase subunit F OS=Homo sapiens GN=ATP6V1F PE=1 SV=2	148	-22.25	148	-22.25	23	394	28	P	GO:0006879	cellular iron ion homeostasis
spu-miR-10	comp104210_c0_seq1	VATF_HUMAN	VATF_HUMAN V-type proton ATPase subunit F OS=Homo sapiens GN=ATP6V1F PE=1 SV=2	148	-22.25	148	-22.25	23	394	28	P	GO:0008286	insulin receptor signaling pathway
spu-miR-10	comp104210_c0_seq1	VATF_HUMAN	VATF_HUMAN V-type proton ATPase subunit F OS=Homo sapiens GN=ATP6V1F PE=1 SV=2	148	-22.25	148	-22.25	23	394	28	F	GO:0005515	protein binding
spu-miR-10	comp104210_c0_seq1	VATF_HUMAN	VATF_HUMAN V-type proton ATPase subunit F OS=Homo sapiens GN=ATP6V1F PE=1 SV=2	148	-22.25	148	-22.25	23	394	28	P	GO:0015992	proton transport
spu-miR-10	comp104210_c0_seq1	VATF_HUMAN	VATF_HUMAN V-type proton ATPase subunit F OS=Homo sapiens GN=ATP6V1F PE=1 SV=2	148	-22.25	148	-22.25	23	394	28	P	GO:0033572	transferrin transport
spu-miR-10	comp104210_c0_seq1	VATF_HUMAN	VATF_HUMAN V-type proton ATPase subunit F OS=Homo sapiens GN=ATP6V1F PE=1 SV=2	148	-22.25	148	-22.25	23	394	28	P	GO:0000003	reproduction
spu-miR-10	comp104210_c0_seq1	VATF_HUMAN	VATF_HUMAN V-type proton ATPase subunit F OS=Homo sapiens GN=ATP6V1F PE=1 SV=2	148	-22.25	148	-22.25	23	394	28	P	GO:0018996	molting cycle, collagen and cuticulin-based cuticle
spu-miR-10	comp104210_c0_seq1	VATF_HUMAN	VATF_HUMAN V-type proton ATPase subunit F OS=Homo sapiens GN=ATP6V1F PE=1 SV=2	148	-22.25	148	-22.25	23	394	28	C	GO:0005829	cytosol
spu-miR-10	comp104210_c0_seq1	VATF_HUMAN	VATF_HUMAN V-type proton ATPase subunit F OS=Homo sapiens GN=ATP6V1F PE=1 SV=2	148	-22.25	148	-22.25	23	394	28	P	GO:0040011	locomotion
spu-miR-10	comp104210_c0_seq1	VATF_HUMAN	VATF_HUMAN V-type proton ATPase subunit F OS=Homo sapiens GN=ATP6V1F PE=1 SV=2	148	-22.25	148	-22.25	23	394	28	P	GO:0055085	transmembrane transport
spu-miR-10	comp104210_c0_seq1	VATF_HUMAN	VATF_HUMAN V-type proton ATPase subunit F OS=Homo sapiens GN=ATP6V1F PE=1 SV=2	148	-22.25	148	-22.25	23	394	28	P	GO:0006898	receptor-mediated endocytosis
spu-miR-10	comp104210_c0_seq1	VATF_HUMAN	VATF_HUMAN V-type proton ATPase subunit F OS=Homo sapiens GN=ATP6V1F PE=1 SV=2	148	-22.25	148	-22.25	23	394	28	P	GO:0002119	nematode larval development
spu-miR-10	comp104210_c0_seq1	VATF_HUMAN	VATF_HUMAN V-type proton ATPase subunit F OS=Homo sapiens GN=ATP6V1F PE=1 SV=2	148	-22.25	148	-22.25	23	394	28	C	GO:0016471	vacuolar proton-transporting V-type ATPase complex
spu-miR-10	comp104210_c0_seq1	VATF_HUMAN	VATF_HUMAN V-type proton ATPase subunit F OS=Homo sapiens GN=ATP6V1F PE=1 SV=2	148	-22.25	148	-22.25	23	394	28	F	GO:0042625	ATPase activity, coupled to transmembrane movement of ions
spu-miR-10	comp104210_c0_seq1	VATF_HUMAN	VATF_HUMAN V-type proton ATPase subunit F OS=Homo sapiens GN=ATP6V1F PE=1 SV=2	148	-22.25	148	-22.25	23	394	28	F	GO:0015078	hydrogen ion transmembrane transporter activity
spu-miR-10	comp104210_c0_seq1	VATF_HUMAN	VATF_HUMAN V-type proton ATPase subunit F OS=Homo sapiens GN=ATP6V1F PE=1 SV=2	148	-22.25	148	-22.25	23	394	28	P	GO:0040007	growth
spu-miR-10	comp104210_c0_seq1	VATF_HUMAN	VATF_HUMAN V-type proton ATPase subunit F OS=Homo sapiens GN=ATP6V1F PE=1 SV=2	148	-22.25	148	-22.25	23	394	28	P	GO:0009792	embryo development ending in birth or egg hatching
spu-miR-7	comp10446_c0_seq14	E1C2U4_CHICK	E1C2U4_CHICK Uncharacterized protein OS=Gallus gallus GN=Gga.30620 PE=3 SV=1	153	-17.57	153	-17.57	23	265	220	C	GO:0000785	chromatin
spu-miR-7	comp10446_c0_seq14	E1C2U4_CHICK	E1C2U4_CHICK Uncharacterized protein OS=Gallus gallus GN=Gga.30620 PE=3 SV=1	153	-17.57	153	-17.57	23	265	220	F	GO:0003678	DNA helicase activity
spu-miR-7	comp10446_c0_seq14	E1C2U4_CHICK	E1C2U4_CHICK Uncharacterized protein OS=Gallus gallus GN=Gga.30620 PE=3 SV=1	153	-17.57	153	-17.57	23	265	220	C	GO:0005657	replication fork
spu-miR-7	comp10446_c0_seq14	E1C2U4_CHICK	E1C2U4_CHICK Uncharacterized protein OS=Gallus gallus GN=Gga.30620 PE=3 SV=1	153	-17.57	153	-17.57	23	265	220	P	GO:0006268	DNA unwinding involved in replication
spu-miR-7	comp10446_c0_seq14	E1C2U4_CHICK	E1C2U4_CHICK Uncharacterized protein OS=Gallus gallus GN=Gga.30620 PE=3 SV=1	153	-17.57	153	-17.57	23	265	220	C	GO:0042555	MCM complex
spu-miR-7	comp10446_c0_seq14	E1C2U4_CHICK	E1C2U4_CHICK Uncharacterized protein OS=Gallus gallus GN=Gga.30620 PE=3 SV=1	153	-17.57	153	-17.57	23	265	220	F	GO:0016887	ATPase activity
spu-miR-7	comp10446_c0_seq14	E1C2U4_CHICK	E1C2U4_CHICK Uncharacterized protein OS=Gallus gallus GN=Gga.30620 PE=3 SV=1	153	-17.57	153	-17.57	23	265	220	F	GO:0005515	protein binding
spu-miR-7	comp10446_c0_seq14	E1C2U4_CHICK	E1C2U4_CHICK Uncharacterized protein OS=Gallus gallus GN=Gga.30620 PE=3 SV=1	153	-17.57	153	-17.57	23	265	220	F	GO:0000166	nucleotide binding
spu-miR-7	comp10446_c0_seq14	E1C2U4_CHICK	E1C2U4_CHICK Uncharacterized protein OS=Gallus gallus GN=Gga.30620 PE=3 SV=1	153	-17.57	153	-17.57	23	265	220	P	GO:0030174	regulation of DNA-dependent DNA replication initiation
spu-miR-7	comp10446_c0_seq14	E1C2U4_CHICK	E1C2U4_CHICK Uncharacterized protein OS=Gallus gallus GN=Gga.30620 PE=3 SV=1	153	-17.57	153	-17.57	23	265	220	F	GO:0003697	single-stranded DNA binding
spu-miR-7	comp10446_c0_seq14	E1C2U4_CHICK	E1C2U4_CHICK Uncharacterized protein OS=Gallus gallus GN=Gga.30620 PE=3 SV=1	153	-17.57	153	-17.57	23	265	220	F	GO:0003682	chromatin binding
spu-miR-7	comp10446_c0_seq14	E1C2U4_CHICK	E1C2U4_CHICK Uncharacterized protein OS=Gallus gallus GN=Gga.30620 PE=3 SV=1	153	-17.57	153	-17.57	23	265	220	P	GO:0006200	ATP catabolic process
spu-miR-2013	comp10446_c0_seq2	MCM4A_XENLA	MCM4A_XENLA DNA replication licensing factor mcm4-A OS=Xenopus laevis GN=mcm4-a PE=1 SV=1	161	-17.5	161	-17.5	21	977	468	P	GO:0007049	cell cycle
spu-miR-2013	comp10446_c0_seq2	MCM4A_XENLA	MCM4A_XENLA DNA replication licensing factor mcm4-A OS=Xenopus laevis GN=mcm4-a PE=1 SV=1	161	-17.5	161	-17.5	21	977	468	C	GO:0010007	magnesium chelatase complex
spu-miR-2013	comp10446_c0_seq2	MCM4A_XENLA	MCM4A_XENLA DNA replication licensing factor mcm4-A OS=Xenopus laevis GN=mcm4-a PE=1 SV=1	161	-17.5	161	-17.5	21	977	468	C	GO:0005657	replication fork
spu-miR-2013	comp10446_c0_seq2	MCM4A_XENLA	MCM4A_XENLA DNA replication licensing factor mcm4-A OS=Xenopus laevis GN=mcm4-a PE=1 SV=1	161	-17.5	161	-17.5	21	977	468	P	GO:0006118	electron transport
spu-miR-2013	comp10446_c0_seq2	MCM4A_XENLA	MCM4A_XENLA DNA replication licensing factor mcm4-A OS=Xenopus laevis GN=mcm4-a PE=1 SV=1	161	-17.5	161	-17.5	21	977	468	F	GO:0046872	metal ion binding
spu-miR-2013	comp10446_c0_seq2	MCM4A_XENLA	MCM4A_XENLA DNA replication licensing factor mcm4-A OS=Xenopus laevis GN=mcm4-a PE=1 SV=1	161	-17.5	161	-17.5	21	977	468	C	GO:0000785	chromatin
spu-miR-2013	comp10446_c0_seq2	MCM4A_XENLA	MCM4A_XENLA DNA replication licensing factor mcm4-A OS=Xenopus laevis GN=mcm4-a PE=1 SV=1	161	-17.5	161	-17.5	21	977	468	F	GO:0005515	protein binding
spu-miR-2013	comp10446_c0_seq2	MCM4A_XENLA	MCM4A_XENLA DNA replication licensing factor mcm4-A OS=Xenopus laevis GN=mcm4-a PE=1 SV=1	161	-17.5	161	-17.5	21	977	468	P	GO:0040007	growth
spu-miR-2013	comp10446_c0_seq2	MCM4A_XENLA	MCM4A_XENLA DNA replication licensing factor mcm4-A OS=Xenopus laevis GN=mcm4-a PE=1 SV=1	161	-17.5	161	-17.5	21	977	468	P	GO:0006268	DNA unwinding involved in replication
spu-miR-2013	comp10446_c0_seq2	MCM4A_XENLA	MCM4A_XENLA DNA replication licensing factor mcm4-A OS=Xenopus laevis GN=mcm4-a PE=1 SV=1	161	-17.5	161	-17.5	21	977	468	F	GO:0016851	magnesium chelatase activity
spu-miR-2013	comp10446_c0_seq2	MCM4A_XENLA	MCM4A_XENLA DNA replication licensing factor mcm4-A OS=Xenopus laevis GN=mcm4-a PE=1 SV=1	161	-17.5	161	-17.5	21	977	468	F	GO:0009055	electron carrier activity
spu-miR-2013	comp10446_c0_seq2	MCM4A_XENLA	MCM4A_XENLA DNA replication licensing factor mcm4-A OS=Xenopus laevis GN=mcm4-a PE=1 SV=1	161	-17.5	161	-17.5	21	977	468	P	GO:0015994	chlorophyll metabolic process
spu-miR-2013	comp10446_c0_seq2	MCM4A_XENLA	MCM4A_XENLA DNA replication licensing factor mcm4-A OS=Xenopus laevis GN=mcm4-a PE=1 SV=1	161	-17.5	161	-17.5	21	977	468	P	GO:0030174	regulation of DNA-dependent DNA replication initiation
spu-miR-2013	comp10446_c0_seq2	MCM4A_XENLA	MCM4A_XENLA DNA replication licensing factor mcm4-A OS=Xenopus laevis GN=mcm4-a PE=1 SV=1	161	-17.5	161	-17.5	21	977	468	F	GO:0005524	ATP binding
spu-miR-2013	comp10446_c0_seq2	MCM4A_XENLA	MCM4A_XENLA DNA replication licensing factor mcm4-A OS=Xenopus laevis GN=mcm4-a PE=1 SV=1	161	-17.5	161	-17.5	21	977	468	P	GO:0009792	embryo development ending in birth or egg hatching
spu-miR-2013	comp10446_c0_seq2	MCM4A_XENLA	MCM4A_XENLA DNA replication licensing factor mcm4-A OS=Xenopus laevis GN=mcm4-a PE=1 SV=1	161	-17.5	161	-17.5	21	977	468	P	GO:0002119	nematode larval development
spu-miR-2013	comp10446_c0_seq2	MCM4A_XENLA	MCM4A_XENLA DNA replication licensing factor mcm4-A OS=Xenopus laevis GN=mcm4-a PE=1 SV=1	161	-17.5	161	-17.5	21	977	468	P	GO:0006997	nucleus organization
spu-miR-2013	comp10446_c0_seq2	MCM4A_XENLA	MCM4A_XENLA DNA replication licensing factor mcm4-A OS=Xenopus laevis GN=mcm4-a PE=1 SV=1	161	-17.5	161	-17.5	21	977	468	C	GO:0042555	MCM complex
spu-miR-2013	comp10446_c0_seq2	MCM4A_XENLA	MCM4A_XENLA DNA replication licensing factor mcm4-A OS=Xenopus laevis GN=mcm4-a PE=1 SV=1	161	-17.5	161	-17.5	21	977	468	F	GO:0004003	ATP-dependent DNA helicase activity
spu-miR-2013	comp10446_c0_seq2	MCM4A_XENLA	MCM4A_XENLA DNA replication licensing factor mcm4-A OS=Xenopus laevis GN=mcm4-a PE=1 SV=1	161	-17.5	161	-17.5	21	977	468	F	GO:0003682	chromatin binding
spu-miR-2013	comp10446_c0_seq2	MCM4A_XENLA	MCM4A_XENLA DNA replication licensing factor mcm4-A OS=Xenopus laevis GN=mcm4-a PE=1 SV=1	161	-17.5	161	-17.5	21	977	468	P	GO:0006200	ATP catabolic process
spu-miR-2013	comp10446_c0_seq2	MCM4A_XENLA	MCM4A_XENLA DNA replication licensing factor mcm4-A OS=Xenopus laevis GN=mcm4-a PE=1 SV=1	161	-17.5	161	-17.5	21	977	468	F	GO:0003697	single-stranded DNA binding
spu-miR-2005	comp10446_c0_seq2	MCM4A_XENLA	MCM4A_XENLA DNA replication licensing factor mcm4-A OS=Xenopus laevis GN=mcm4-a PE=1 SV=1	145	-21.07	145	-21.07	24	977	704	P	GO:0007049	cell cycle
spu-miR-2005	comp10446_c0_seq2	MCM4A_XENLA	MCM4A_XENLA DNA replication licensing factor mcm4-A OS=Xenopus laevis GN=mcm4-a PE=1 SV=1	145	-21.07	145	-21.07	24	977	704	C	GO:0010007	magnesium chelatase complex
spu-miR-2005	comp10446_c0_seq2	MCM4A_XENLA	MCM4A_XENLA DNA replication licensing factor mcm4-A OS=Xenopus laevis GN=mcm4-a PE=1 SV=1	145	-21.07	145	-21.07	24	977	704	C	GO:0005657	replication fork
spu-miR-2005	comp10446_c0_seq2	MCM4A_XENLA	MCM4A_XENLA DNA replication licensing factor mcm4-A OS=Xenopus laevis GN=mcm4-a PE=1 SV=1	145	-21.07	145	-21.07	24	977	704	P	GO:0006118	electron transport
spu-miR-2005	comp10446_c0_seq2	MCM4A_XENLA	MCM4A_XENLA DNA replication licensing factor mcm4-A OS=Xenopus laevis GN=mcm4-a PE=1 SV=1	145	-21.07	145	-21.07	24	977	704	F	GO:0046872	metal ion binding
spu-miR-2005	comp10446_c0_seq2	MCM4A_XENLA	MCM4A_XENLA DNA replication licensing factor mcm4-A OS=Xenopus laevis GN=mcm4-a PE=1 SV=1	145	-21.07	145	-21.07	24	977	704	C	GO:0000785	chromatin
spu-miR-2005	comp10446_c0_seq2	MCM4A_XENLA	MCM4A_XENLA DNA replication licensing factor mcm4-A OS=Xenopus laevis GN=mcm4-a PE=1 SV=1	145	-21.07	145	-21.07	24	977	704	F	GO:0005515	protein binding
spu-miR-2005	comp10446_c0_seq2	MCM4A_XENLA	MCM4A_XENLA DNA replication licensing factor mcm4-A OS=Xenopus laevis GN=mcm4-a PE=1 SV=1	145	-21.07	145	-21.07	24	977	704	P	GO:0040007	growth
spu-miR-2005	comp10446_c0_seq2	MCM4A_XENLA	MCM4A_XENLA DNA replication licensing factor mcm4-A OS=Xenopus laevis GN=mcm4-a PE=1 SV=1	145	-21.07	145	-21.07	24	977	704	P	GO:0006268	DNA unwinding involved in replication
spu-miR-2005	comp10446_c0_seq2	MCM4A_XENLA	MCM4A_XENLA DNA replication licensing factor mcm4-A OS=Xenopus laevis GN=mcm4-a PE=1 SV=1	145	-21.07	145	-21.07	24	977	704	F	GO:0016851	magnesium chelatase activity
spu-miR-2005	comp10446_c0_seq2	MCM4A_XENLA	MCM4A_XENLA DNA replication licensing factor mcm4-A OS=Xenopus laevis GN=mcm4-a PE=1 SV=1	145	-21.07	145	-21.07	24	977	704	F	GO:0009055	electron carrier activity
spu-miR-2005	comp10446_c0_seq2	MCM4A_XENLA	MCM4A_XENLA DNA replication licensing factor mcm4-A OS=Xenopus laevis GN=mcm4-a PE=1 SV=1	145	-21.07	145	-21.07	24	977	704	P	GO:0015994	chlorophyll metabolic process
spu-miR-2005	comp10446_c0_seq2	MCM4A_XENLA	MCM4A_XENLA DNA replication licensing factor mcm4-A OS=Xenopus laevis GN=mcm4-a PE=1 SV=1	145	-21.07	145	-21.07	24	977	704	P	GO:0030174	regulation of DNA-dependent DNA replication initiation
spu-miR-2005	comp10446_c0_seq2	MCM4A_XENLA	MCM4A_XENLA DNA replication licensing factor mcm4-A OS=Xenopus laevis GN=mcm4-a PE=1 SV=1	145	-21.07	145	-21.07	24	977	704	F	GO:0005524	ATP binding
spu-miR-2005	comp10446_c0_seq2	MCM4A_XENLA	MCM4A_XENLA DNA replication licensing factor mcm4-A OS=Xenopus laevis GN=mcm4-a PE=1 SV=1	145	-21.07	145	-21.07	24	977	704	P	GO:0009792	embryo development ending in birth or egg hatching
spu-miR-2005	comp10446_c0_seq2	MCM4A_XENLA	MCM4A_XENLA DNA replication licensing factor mcm4-A OS=Xenopus laevis GN=mcm4-a PE=1 SV=1	145	-21.07	145	-21.07	24	977	704	P	GO:0002119	nematode larval development
spu-miR-2005	comp10446_c0_seq2	MCM4A_XENLA	MCM4A_XENLA DNA replication licensing factor mcm4-A OS=Xenopus laevis GN=mcm4-a PE=1 SV=1	145	-21.07	145	-21.07	24	977	704	P	GO:0006997	nucleus organization
spu-miR-2005	comp10446_c0_seq2	MCM4A_XENLA	MCM4A_XENLA DNA replication licensing factor mcm4-A OS=Xenopus laevis GN=mcm4-a PE=1 SV=1	145	-21.07	145	-21.07	24	977	704	C	GO:0042555	MCM complex
spu-miR-2005	comp10446_c0_seq2	MCM4A_XENLA	MCM4A_XENLA DNA replication licensing factor mcm4-A OS=Xenopus laevis GN=mcm4-a PE=1 SV=1	145	-21.07	145	-21.07	24	977	704	F	GO:0004003	ATP-dependent DNA helicase activity
spu-miR-2005	comp10446_c0_seq2	MCM4A_XENLA	MCM4A_XENLA DNA replication licensing factor mcm4-A OS=Xenopus laevis GN=mcm4-a PE=1 SV=1	145	-21.07	145	-21.07	24	977	704	F	GO:0003682	chromatin binding
spu-miR-2005	comp10446_c0_seq2	MCM4A_XENLA	MCM4A_XENLA DNA replication licensing factor mcm4-A OS=Xenopus laevis GN=mcm4-a PE=1 SV=1	145	-21.07	145	-21.07	24	977	704	P	GO:0006200	ATP catabolic process
spu-miR-2005	comp10446_c0_seq2	MCM4A_XENLA	MCM4A_XENLA DNA replication licensing factor mcm4-A OS=Xenopus laevis GN=mcm4-a PE=1 SV=1	145	-21.07	145	-21.07	24	977	704	F	GO:0003697	single-stranded DNA binding
spu-miR-4853	comp10446_c0_seq5	Q6NZV2_DANRE	Q6NZV2_DANRE MCM4 minichromosome maintenance deficient 4, mitotin (S. cerevisiae) OS=Danio rerio GN=mcm4 PE=2 SV=1	142	-24.1	142	-24.1	24	561	118	P	GO:0007049	cell cycle
spu-miR-4853	comp10446_c0_seq5	Q6NZV2_DANRE	Q6NZV2_DANRE MCM4 minichromosome maintenance deficient 4, mitotin (S. cerevisiae) OS=Danio rerio GN=mcm4 PE=2 SV=1	142	-24.1	142	-24.1	24	561	118	F	GO:0003697	single-stranded DNA binding
spu-miR-4853	comp10446_c0_seq5	Q6NZV2_DANRE	Q6NZV2_DANRE MCM4 minichromosome maintenance deficient 4, mitotin (S. cerevisiae) OS=Danio rerio GN=mcm4 PE=2 SV=1	142	-24.1	142	-24.1	24	561	118	C	GO:0005657	replication fork
spu-miR-4853	comp10446_c0_seq5	Q6NZV2_DANRE	Q6NZV2_DANRE MCM4 minichromosome maintenance deficient 4, mitotin (S. cerevisiae) OS=Danio rerio GN=mcm4 PE=2 SV=1	142	-24.1	142	-24.1	24	561	118	P	GO:0006118	electron transport
spu-miR-4853	comp10446_c0_seq5	Q6NZV2_DANRE	Q6NZV2_DANRE MCM4 minichromosome maintenance deficient 4, mitotin (S. cerevisiae) OS=Danio rerio GN=mcm4 PE=2 SV=1	142	-24.1	142	-24.1	24	561	118	P	GO:0009792	embryo development ending in birth or egg hatching
spu-miR-4853	comp10446_c0_seq5	Q6NZV2_DANRE	Q6NZV2_DANRE MCM4 minichromosome maintenance deficient 4, mitotin (S. cerevisiae) OS=Danio rerio GN=mcm4 PE=2 SV=1	142	-24.1	142	-24.1	24	561	118	F	GO:0005515	protein binding
spu-miR-4853	comp10446_c0_seq5	Q6NZV2_DANRE	Q6NZV2_DANRE MCM4 minichromosome maintenance deficient 4, mitotin (S. cerevisiae) OS=Danio rerio GN=mcm4 PE=2 SV=1	142	-24.1	142	-24.1	24	561	118	P	GO:0040007	growth
spu-miR-4853	comp10446_c0_seq5	Q6NZV2_DANRE	Q6NZV2_DANRE MCM4 minichromosome maintenance deficient 4, mitotin (S. cerevisiae) OS=Danio rerio GN=mcm4 PE=2 SV=1	142	-24.1	142	-24.1	24	561	118	P	GO:0006268	DNA unwinding involved in replication
spu-miR-4853	comp10446_c0_seq5	Q6NZV2_DANRE	Q6NZV2_DANRE MCM4 minichromosome maintenance deficient 4, mitotin (S. cerevisiae) OS=Danio rerio GN=mcm4 PE=2 SV=1	142	-24.1	142	-24.1	24	561	118	F	GO:0009055	electron carrier activity
spu-miR-4853	comp10446_c0_seq5	Q6NZV2_DANRE	Q6NZV2_DANRE MCM4 minichromosome maintenance deficient 4, mitotin (S. cerevisiae) OS=Danio rerio GN=mcm4 PE=2 SV=1	142	-24.1	142	-24.1	24	561	118	F	GO:0046872	metal ion binding
spu-miR-4853	comp10446_c0_seq5	Q6NZV2_DANRE	Q6NZV2_DANRE MCM4 minichromosome maintenance deficient 4, mitotin (S. cerevisiae) OS=Danio rerio GN=mcm4 PE=2 SV=1	142	-24.1	142	-24.1	24	561	118	C	GO:0000785	chromatin
spu-miR-4853	comp10446_c0_seq5	Q6NZV2_DANRE	Q6NZV2_DANRE MCM4 minichromosome maintenance deficient 4, mitotin (S. cerevisiae) OS=Danio rerio GN=mcm4 PE=2 SV=1	142	-24.1	142	-24.1	24	561	118	F	GO:0005524	ATP binding
spu-miR-4853	comp10446_c0_seq5	Q6NZV2_DANRE	Q6NZV2_DANRE MCM4 minichromosome maintenance deficient 4, mitotin (S. cerevisiae) OS=Danio rerio GN=mcm4 PE=2 SV=1	142	-24.1	142	-24.1	24	561	118	P	GO:0030174	regulation of DNA-dependent DNA replication initiation
spu-miR-4853	comp10446_c0_seq5	Q6NZV2_DANRE	Q6NZV2_DANRE MCM4 minichromosome maintenance deficient 4, mitotin (S. cerevisiae) OS=Danio rerio GN=mcm4 PE=2 SV=1	142	-24.1	142	-24.1	24	561	118	P	GO:0002119	nematode larval development
spu-miR-4853	comp10446_c0_seq5	Q6NZV2_DANRE	Q6NZV2_DANRE MCM4 minichromosome maintenance deficient 4, mitotin (S. cerevisiae) OS=Danio rerio GN=mcm4 PE=2 SV=1	142	-24.1	142	-24.1	24	561	118	P	GO:0006997	nucleus organization
spu-miR-4853	comp10446_c0_seq5	Q6NZV2_DANRE	Q6NZV2_DANRE MCM4 minichromosome maintenance deficient 4, mitotin (S. cerevisiae) OS=Danio rerio GN=mcm4 PE=2 SV=1	142	-24.1	142	-24.1	24	561	118	C	GO:0042555	MCM complex
spu-miR-4853	comp10446_c0_seq5	Q6NZV2_DANRE	Q6NZV2_DANRE MCM4 minichromosome maintenance deficient 4, mitotin (S. cerevisiae) OS=Danio rerio GN=mcm4 PE=2 SV=1	142	-24.1	142	-24.1	24	561	118	F	GO:0004003	ATP-dependent DNA helicase activity
spu-miR-4853	comp10446_c0_seq5	Q6NZV2_DANRE	Q6NZV2_DANRE MCM4 minichromosome maintenance deficient 4, mitotin (S. cerevisiae) OS=Danio rerio GN=mcm4 PE=2 SV=1	142	-24.1	142	-24.1	24	561	118	F	GO:0003682	chromatin binding
spu-miR-4853	comp10446_c0_seq5	Q6NZV2_DANRE	Q6NZV2_DANRE MCM4 minichromosome maintenance deficient 4, mitotin (S. cerevisiae) OS=Danio rerio GN=mcm4 PE=2 SV=1	142	-24.1	142	-24.1	24	561	118	P	GO:0006200	ATP catabolic process
spu-miR-375	comp10446_c0_seq6	Q6NZV2_DANRE	Q6NZV2_DANRE MCM4 minichromosome maintenance deficient 4, mitotin (S. cerevisiae) OS=Danio rerio GN=mcm4 PE=2 SV=1	144	-24.82	144	-24.82	22	551	24	P	GO:0006118	electron transport
spu-miR-375	comp10446_c0_seq6	Q6NZV2_DANRE	Q6NZV2_DANRE MCM4 minichromosome maintenance deficient 4, mitotin (S. cerevisiae) OS=Danio rerio GN=mcm4 PE=2 SV=1	144	-24.82	144	-24.82	22	551	24	C	GO:0005657	replication fork
spu-miR-375	comp10446_c0_seq6	Q6NZV2_DANRE	Q6NZV2_DANRE MCM4 minichromosome maintenance deficient 4, mitotin (S. cerevisiae) OS=Danio rerio GN=mcm4 PE=2 SV=1	144	-24.82	144	-24.82	22	551	24	P	GO:0007049	cell cycle
spu-miR-375	comp10446_c0_seq6	Q6NZV2_DANRE	Q6NZV2_DANRE MCM4 minichromosome maintenance deficient 4, mitotin (S. cerevisiae) OS=Danio rerio GN=mcm4 PE=2 SV=1	144	-24.82	144	-24.82	22	551	24	P	GO:0009792	embryo development ending in birth or egg hatching
spu-miR-375	comp10446_c0_seq6	Q6NZV2_DANRE	Q6NZV2_DANRE MCM4 minichromosome maintenance deficient 4, mitotin (S. cerevisiae) OS=Danio rerio GN=mcm4 PE=2 SV=1	144	-24.82	144	-24.82	22	551	24	C	GO:0000785	chromatin
spu-miR-375	comp10446_c0_seq6	Q6NZV2_DANRE	Q6NZV2_DANRE MCM4 minichromosome maintenance deficient 4, mitotin (S. cerevisiae) OS=Danio rerio GN=mcm4 PE=2 SV=1	144	-24.82	144	-24.82	22	551	24	C	GO:0042555	MCM complex
spu-miR-375	comp10446_c0_seq6	Q6NZV2_DANRE	Q6NZV2_DANRE MCM4 minichromosome maintenance deficient 4, mitotin (S. cerevisiae) OS=Danio rerio GN=mcm4 PE=2 SV=1	144	-24.82	144	-24.82	22	551	24	P	GO:0002119	nematode larval development
spu-miR-375	comp10446_c0_seq6	Q6NZV2_DANRE	Q6NZV2_DANRE MCM4 minichromosome maintenance deficient 4, mitotin (S. cerevisiae) OS=Danio rerio GN=mcm4 PE=2 SV=1	144	-24.82	144	-24.82	22	551	24	F	GO:0046872	metal ion binding
spu-miR-375	comp10446_c0_seq6	Q6NZV2_DANRE	Q6NZV2_DANRE MCM4 minichromosome maintenance deficient 4, mitotin (S. cerevisiae) OS=Danio rerio GN=mcm4 PE=2 SV=1	144	-24.82	144	-24.82	22	551	24	P	GO:0006997	nucleus organization
spu-miR-375	comp10446_c0_seq6	Q6NZV2_DANRE	Q6NZV2_DANRE MCM4 minichromosome maintenance deficient 4, mitotin (S. cerevisiae) OS=Danio rerio GN=mcm4 PE=2 SV=1	144	-24.82	144	-24.82	22	551	24	P	GO:0030174	regulation of DNA-dependent DNA replication initiation
spu-miR-375	comp10446_c0_seq6	Q6NZV2_DANRE	Q6NZV2_DANRE MCM4 minichromosome maintenance deficient 4, mitotin (S. cerevisiae) OS=Danio rerio GN=mcm4 PE=2 SV=1	144	-24.82	144	-24.82	22	551	24	F	GO:0005524	ATP binding
spu-miR-375	comp10446_c0_seq6	Q6NZV2_DANRE	Q6NZV2_DANRE MCM4 minichromosome maintenance deficient 4, mitotin (S. cerevisiae) OS=Danio rerio GN=mcm4 PE=2 SV=1	144	-24.82	144	-24.82	22	551	24	F	GO:0003697	single-stranded DNA binding
spu-miR-375	comp10446_c0_seq6	Q6NZV2_DANRE	Q6NZV2_DANRE MCM4 minichromosome maintenance deficient 4, mitotin (S. cerevisiae) OS=Danio rerio GN=mcm4 PE=2 SV=1	144	-24.82	144	-24.82	22	551	24	F	GO:0004003	ATP-dependent DNA helicase activity
spu-miR-375	comp10446_c0_seq6	Q6NZV2_DANRE	Q6NZV2_DANRE MCM4 minichromosome maintenance deficient 4, mitotin (S. cerevisiae) OS=Danio rerio GN=mcm4 PE=2 SV=1	144	-24.82	144	-24.82	22	551	24	F	GO:0009055	electron carrier activity
spu-miR-375	comp10446_c0_seq6	Q6NZV2_DANRE	Q6NZV2_DANRE MCM4 minichromosome maintenance deficient 4, mitotin (S. cerevisiae) OS=Danio rerio GN=mcm4 PE=2 SV=1	144	-24.82	144	-24.82	22	551	24	P	GO:0006268	DNA unwinding involved in replication
spu-miR-375	comp10446_c0_seq6	Q6NZV2_DANRE	Q6NZV2_DANRE MCM4 minichromosome maintenance deficient 4, mitotin (S. cerevisiae) OS=Danio rerio GN=mcm4 PE=2 SV=1	144	-24.82	144	-24.82	22	551	24	F	GO:0005515	protein binding
spu-miR-375	comp10446_c0_seq6	Q6NZV2_DANRE	Q6NZV2_DANRE MCM4 minichromosome maintenance deficient 4, mitotin (S. cerevisiae) OS=Danio rerio GN=mcm4 PE=2 SV=1	144	-24.82	144	-24.82	22	551	24	P	GO:0006200	ATP catabolic process
spu-miR-375	comp10446_c0_seq6	Q6NZV2_DANRE	Q6NZV2_DANRE MCM4 minichromosome maintenance deficient 4, mitotin (S. cerevisiae) OS=Danio rerio GN=mcm4 PE=2 SV=1	144	-24.82	144	-24.82	22	551	24	F	GO:0003682	chromatin binding
spu-miR-375	comp10446_c0_seq6	Q6NZV2_DANRE	Q6NZV2_DANRE MCM4 minichromosome maintenance deficient 4, mitotin (S. cerevisiae) OS=Danio rerio GN=mcm4 PE=2 SV=1	144	-24.82	144	-24.82	22	551	24	P	GO:0040007	growth
spu-miR-4853	comp10446_c0_seq6	Q6NZV2_DANRE	Q6NZV2_DANRE MCM4 minichromosome maintenance deficient 4, mitotin (S. cerevisiae) OS=Danio rerio GN=mcm4 PE=2 SV=1	428	-72.16	143	-28.04	24	551	139 201 355	P	GO:0006118	electron transport
spu-miR-4853	comp10446_c0_seq6	Q6NZV2_DANRE	Q6NZV2_DANRE MCM4 minichromosome maintenance deficient 4, mitotin (S. cerevisiae) OS=Danio rerio GN=mcm4 PE=2 SV=1	428	-72.16	143	-28.04	24	551	139 201 355	C	GO:0005657	replication fork
spu-miR-4853	comp10446_c0_seq6	Q6NZV2_DANRE	Q6NZV2_DANRE MCM4 minichromosome maintenance deficient 4, mitotin (S. cerevisiae) OS=Danio rerio GN=mcm4 PE=2 SV=1	428	-72.16	143	-28.04	24	551	139 201 355	P	GO:0007049	cell cycle
spu-miR-4853	comp10446_c0_seq6	Q6NZV2_DANRE	Q6NZV2_DANRE MCM4 minichromosome maintenance deficient 4, mitotin (S. cerevisiae) OS=Danio rerio GN=mcm4 PE=2 SV=1	428	-72.16	143	-28.04	24	551	139 201 355	P	GO:0009792	embryo development ending in birth or egg hatching
spu-miR-4853	comp10446_c0_seq6	Q6NZV2_DANRE	Q6NZV2_DANRE MCM4 minichromosome maintenance deficient 4, mitotin (S. cerevisiae) OS=Danio rerio GN=mcm4 PE=2 SV=1	428	-72.16	143	-28.04	24	551	139 201 355	C	GO:0000785	chromatin
spu-miR-4853	comp10446_c0_seq6	Q6NZV2_DANRE	Q6NZV2_DANRE MCM4 minichromosome maintenance deficient 4, mitotin (S. cerevisiae) OS=Danio rerio GN=mcm4 PE=2 SV=1	428	-72.16	143	-28.04	24	551	139 201 355	C	GO:0042555	MCM complex
spu-miR-4853	comp10446_c0_seq6	Q6NZV2_DANRE	Q6NZV2_DANRE MCM4 minichromosome maintenance deficient 4, mitotin (S. cerevisiae) OS=Danio rerio GN=mcm4 PE=2 SV=1	428	-72.16	143	-28.04	24	551	139 201 355	P	GO:0002119	nematode larval development
spu-miR-4853	comp10446_c0_seq6	Q6NZV2_DANRE	Q6NZV2_DANRE MCM4 minichromosome maintenance deficient 4, mitotin (S. cerevisiae) OS=Danio rerio GN=mcm4 PE=2 SV=1	428	-72.16	143	-28.04	24	551	139 201 355	F	GO:0046872	metal ion binding
spu-miR-4853	comp10446_c0_seq6	Q6NZV2_DANRE	Q6NZV2_DANRE MCM4 minichromosome maintenance deficient 4, mitotin (S. cerevisiae) OS=Danio rerio GN=mcm4 PE=2 SV=1	428	-72.16	143	-28.04	24	551	139 201 355	P	GO:0006997	nucleus organization
spu-miR-4853	comp10446_c0_seq6	Q6NZV2_DANRE	Q6NZV2_DANRE MCM4 minichromosome maintenance deficient 4, mitotin (S. cerevisiae) OS=Danio rerio GN=mcm4 PE=2 SV=1	428	-72.16	143	-28.04	24	551	139 201 355	P	GO:0030174	regulation of DNA-dependent DNA replication initiation
spu-miR-4853	comp10446_c0_seq6	Q6NZV2_DANRE	Q6NZV2_DANRE MCM4 minichromosome maintenance deficient 4, mitotin (S. cerevisiae) OS=Danio rerio GN=mcm4 PE=2 SV=1	428	-72.16	143	-28.04	24	551	139 201 355	F	GO:0005524	ATP binding
spu-miR-4853	comp10446_c0_seq6	Q6NZV2_DANRE	Q6NZV2_DANRE MCM4 minichromosome maintenance deficient 4, mitotin (S. cerevisiae) OS=Danio rerio GN=mcm4 PE=2 SV=1	428	-72.16	143	-28.04	24	551	139 201 355	F	GO:0003697	single-stranded DNA binding
spu-miR-4853	comp10446_c0_seq6	Q6NZV2_DANRE	Q6NZV2_DANRE MCM4 minichromosome maintenance deficient 4, mitotin (S. cerevisiae) OS=Danio rerio GN=mcm4 PE=2 SV=1	428	-72.16	143	-28.04	24	551	139 201 355	F	GO:0004003	ATP-dependent DNA helicase activity
spu-miR-4853	comp10446_c0_seq6	Q6NZV2_DANRE	Q6NZV2_DANRE MCM4 minichromosome maintenance deficient 4, mitotin (S. cerevisiae) OS=Danio rerio GN=mcm4 PE=2 SV=1	428	-72.16	143	-28.04	24	551	139 201 355	F	GO:0009055	electron carrier activity
spu-miR-4853	comp10446_c0_seq6	Q6NZV2_DANRE	Q6NZV2_DANRE MCM4 minichromosome maintenance deficient 4, mitotin (S. cerevisiae) OS=Danio rerio GN=mcm4 PE=2 SV=1	428	-72.16	143	-28.04	24	551	139 201 355	P	GO:0006268	DNA unwinding involved in replication
spu-miR-4853	comp10446_c0_seq6	Q6NZV2_DANRE	Q6NZV2_DANRE MCM4 minichromosome maintenance deficient 4, mitotin (S. cerevisiae) OS=Danio rerio GN=mcm4 PE=2 SV=1	428	-72.16	143	-28.04	24	551	139 201 355	F	GO:0005515	protein binding
spu-miR-4853	comp10446_c0_seq6	Q6NZV2_DANRE	Q6NZV2_DANRE MCM4 minichromosome maintenance deficient 4, mitotin (S. cerevisiae) OS=Danio rerio GN=mcm4 PE=2 SV=1	428	-72.16	143	-28.04	24	551	139 201 355	P	GO:0006200	ATP catabolic process
spu-miR-4853	comp10446_c0_seq6	Q6NZV2_DANRE	Q6NZV2_DANRE MCM4 minichromosome maintenance deficient 4, mitotin (S. cerevisiae) OS=Danio rerio GN=mcm4 PE=2 SV=1	428	-72.16	143	-28.04	24	551	139 201 355	F	GO:0003682	chromatin binding
spu-miR-4853	comp10446_c0_seq6	Q6NZV2_DANRE	Q6NZV2_DANRE MCM4 minichromosome maintenance deficient 4, mitotin (S. cerevisiae) OS=Danio rerio GN=mcm4 PE=2 SV=1	428	-72.16	143	-28.04	24	551	139 201 355	P	GO:0040007	growth
spu-miR-2010	comp10446_c0_seq9	MCM4_XENTR	MCM4_XENTR DNA replication licensing factor mcm4 OS=Xenopus tropicalis GN=mcm4 PE=2 SV=1	144	-18.78	144	-18.78	22	469	319	P	GO:0006118	electron transport
spu-miR-2010	comp10446_c0_seq9	MCM4_XENTR	MCM4_XENTR DNA replication licensing factor mcm4 OS=Xenopus tropicalis GN=mcm4 PE=2 SV=1	144	-18.78	144	-18.78	22	469	319	F	GO:0046872	metal ion binding
spu-miR-2010	comp10446_c0_seq9	MCM4_XENTR	MCM4_XENTR DNA replication licensing factor mcm4 OS=Xenopus tropicalis GN=mcm4 PE=2 SV=1	144	-18.78	144	-18.78	22	469	319	P	GO:0009792	embryo development ending in birth or egg hatching
spu-miR-2010	comp10446_c0_seq9	MCM4_XENTR	MCM4_XENTR DNA replication licensing factor mcm4 OS=Xenopus tropicalis GN=mcm4 PE=2 SV=1	144	-18.78	144	-18.78	22	469	319	C	GO:0005657	replication fork
spu-miR-2010	comp10446_c0_seq9	MCM4_XENTR	MCM4_XENTR DNA replication licensing factor mcm4 OS=Xenopus tropicalis GN=mcm4 PE=2 SV=1	144	-18.78	144	-18.78	22	469	319	P	GO:0007049	cell cycle
spu-miR-2010	comp10446_c0_seq9	MCM4_XENTR	MCM4_XENTR DNA replication licensing factor mcm4 OS=Xenopus tropicalis GN=mcm4 PE=2 SV=1	144	-18.78	144	-18.78	22	469	319	F	GO:0005524	ATP binding
spu-miR-2010	comp10446_c0_seq9	MCM4_XENTR	MCM4_XENTR DNA replication licensing factor mcm4 OS=Xenopus tropicalis GN=mcm4 PE=2 SV=1	144	-18.78	144	-18.78	22	469	319	P	GO:0006200	ATP catabolic process
spu-miR-2010	comp10446_c0_seq9	MCM4_XENTR	MCM4_XENTR DNA replication licensing factor mcm4 OS=Xenopus tropicalis GN=mcm4 PE=2 SV=1	144	-18.78	144	-18.78	22	469	319	F	GO:0003682	chromatin binding
spu-miR-2010	comp10446_c0_seq9	MCM4_XENTR	MCM4_XENTR DNA replication licensing factor mcm4 OS=Xenopus tropicalis GN=mcm4 PE=2 SV=1	144	-18.78	144	-18.78	22	469	319	F	GO:0004003	ATP-dependent DNA helicase activity
spu-miR-2010	comp10446_c0_seq9	MCM4_XENTR	MCM4_XENTR DNA replication licensing factor mcm4 OS=Xenopus tropicalis GN=mcm4 PE=2 SV=1	144	-18.78	144	-18.78	22	469	319	C	GO:0042555	MCM complex
spu-miR-2010	comp10446_c0_seq9	MCM4_XENTR	MCM4_XENTR DNA replication licensing factor mcm4 OS=Xenopus tropicalis GN=mcm4 PE=2 SV=1	144	-18.78	144	-18.78	22	469	319	P	GO:0002119	nematode larval development
spu-miR-2010	comp10446_c0_seq9	MCM4_XENTR	MCM4_XENTR DNA replication licensing factor mcm4 OS=Xenopus tropicalis GN=mcm4 PE=2 SV=1	144	-18.78	144	-18.78	22	469	319	P	GO:0030174	regulation of DNA-dependent DNA replication initiation
spu-miR-2010	comp10446_c0_seq9	MCM4_XENTR	MCM4_XENTR DNA replication licensing factor mcm4 OS=Xenopus tropicalis GN=mcm4 PE=2 SV=1	144	-18.78	144	-18.78	22	469	319	F	GO:0009055	electron carrier activity
spu-miR-2010	comp10446_c0_seq9	MCM4_XENTR	MCM4_XENTR DNA replication licensing factor mcm4 OS=Xenopus tropicalis GN=mcm4 PE=2 SV=1	144	-18.78	144	-18.78	22	469	319	P	GO:0006268	DNA unwinding involved in replication
spu-miR-2010	comp10446_c0_seq9	MCM4_XENTR	MCM4_XENTR DNA replication licensing factor mcm4 OS=Xenopus tropicalis GN=mcm4 PE=2 SV=1	144	-18.78	144	-18.78	22	469	319	P	GO:0040007	growth
spu-miR-2010	comp10446_c0_seq9	MCM4_XENTR	MCM4_XENTR DNA replication licensing factor mcm4 OS=Xenopus tropicalis GN=mcm4 PE=2 SV=1	144	-18.78	144	-18.78	22	469	319	F	GO:0005515	protein binding
spu-miR-2010	comp10446_c0_seq9	MCM4_XENTR	MCM4_XENTR DNA replication licensing factor mcm4 OS=Xenopus tropicalis GN=mcm4 PE=2 SV=1	144	-18.78	144	-18.78	22	469	319	C	GO:0000785	chromatin
spu-miR-2010	comp10446_c0_seq9	MCM4_XENTR	MCM4_XENTR DNA replication licensing factor mcm4 OS=Xenopus tropicalis GN=mcm4 PE=2 SV=1	144	-18.78	144	-18.78	22	469	319	P	GO:0006997	nucleus organization
spu-miR-2010	comp10446_c0_seq9	MCM4_XENTR	MCM4_XENTR DNA replication licensing factor mcm4 OS=Xenopus tropicalis GN=mcm4 PE=2 SV=1	144	-18.78	144	-18.78	22	469	319	F	GO:0003697	single-stranded DNA binding
spu-miR-9	comp10474_c0_seq3	ACAC_CHICK	ACAC_CHICK Acetyl-CoA carboxylase OS=Gallus gallus GN=ACAC PE=1 SV=1	143	-18.12	143	-18.12	22	891	442	P	GO:0006112	energy reserve metabolic process
spu-miR-9	comp10474_c0_seq3	ACAC_CHICK	ACAC_CHICK Acetyl-CoA carboxylase OS=Gallus gallus GN=ACAC PE=1 SV=1	143	-18.12	143	-18.12	22	891	442	P	GO:0055088	lipid homeostasis
spu-miR-9	comp10474_c0_seq3	ACAC_CHICK	ACAC_CHICK Acetyl-CoA carboxylase OS=Gallus gallus GN=ACAC PE=1 SV=1	143	-18.12	143	-18.12	22	891	442	F	GO:0004075	biotin carboxylase activity
spu-miR-9	comp10474_c0_seq3	ACAC_CHICK	ACAC_CHICK Acetyl-CoA carboxylase OS=Gallus gallus GN=ACAC PE=1 SV=1	143	-18.12	143	-18.12	22	891	442	P	GO:0051289	protein homotetramerization
spu-miR-9	comp10474_c0_seq3	ACAC_CHICK	ACAC_CHICK Acetyl-CoA carboxylase OS=Gallus gallus GN=ACAC PE=1 SV=1	143	-18.12	143	-18.12	22	891	442	C	GO:0016020	membrane
spu-miR-9	comp10474_c0_seq3	ACAC_CHICK	ACAC_CHICK Acetyl-CoA carboxylase OS=Gallus gallus GN=ACAC PE=1 SV=1	143	-18.12	143	-18.12	22	891	442	P	GO:0031325	positive regulation of cellular metabolic process
spu-miR-9	comp10474_c0_seq3	ACAC_CHICK	ACAC_CHICK Acetyl-CoA carboxylase OS=Gallus gallus GN=ACAC PE=1 SV=1	143	-18.12	143	-18.12	22	891	442	P	GO:0006633	fatty acid biosynthetic process
spu-miR-9	comp10474_c0_seq3	ACAC_CHICK	ACAC_CHICK Acetyl-CoA carboxylase OS=Gallus gallus GN=ACAC PE=1 SV=1	143	-18.12	143	-18.12	22	891	442	F	GO:0003989	acetyl-CoA carboxylase activity
spu-miR-9	comp10474_c0_seq3	ACAC_CHICK	ACAC_CHICK Acetyl-CoA carboxylase OS=Gallus gallus GN=ACAC PE=1 SV=1	143	-18.12	143	-18.12	22	891	442	F	GO:0009374	biotin binding
spu-miR-9	comp10474_c0_seq3	ACAC_CHICK	ACAC_CHICK Acetyl-CoA carboxylase OS=Gallus gallus GN=ACAC PE=1 SV=1	143	-18.12	143	-18.12	22	891	442	P	GO:0006084	acetyl-CoA metabolic process
spu-miR-9	comp10474_c0_seq3	ACAC_CHICK	ACAC_CHICK Acetyl-CoA carboxylase OS=Gallus gallus GN=ACAC PE=1 SV=1	143	-18.12	143	-18.12	22	891	442	P	GO:0014070	response to organic cyclic compound
spu-miR-9	comp10474_c0_seq3	ACAC_CHICK	ACAC_CHICK Acetyl-CoA carboxylase OS=Gallus gallus GN=ACAC PE=1 SV=1	143	-18.12	143	-18.12	22	891	442	P	GO:0046320	regulation of fatty acid oxidation
spu-miR-9	comp10474_c0_seq3	ACAC_CHICK	ACAC_CHICK Acetyl-CoA carboxylase OS=Gallus gallus GN=ACAC PE=1 SV=1	143	-18.12	143	-18.12	22	891	442	P	GO:0044268	multicellular organismal protein metabolic process
spu-miR-9	comp10474_c0_seq3	ACAC_CHICK	ACAC_CHICK Acetyl-CoA carboxylase OS=Gallus gallus GN=ACAC PE=1 SV=1	143	-18.12	143	-18.12	22	891	442	P	GO:0042493	response to drug
spu-miR-9	comp10474_c0_seq3	ACAC_CHICK	ACAC_CHICK Acetyl-CoA carboxylase OS=Gallus gallus GN=ACAC PE=1 SV=1	143	-18.12	143	-18.12	22	891	442	C	GO:0012505	endomembrane system
spu-miR-9	comp10474_c0_seq3	ACAC_CHICK	ACAC_CHICK Acetyl-CoA carboxylase OS=Gallus gallus GN=ACAC PE=1 SV=1	143	-18.12	143	-18.12	22	891	442	C	GO:0005794	Golgi apparatus
spu-miR-9	comp10474_c0_seq3	ACAC_CHICK	ACAC_CHICK Acetyl-CoA carboxylase OS=Gallus gallus GN=ACAC PE=1 SV=1	143	-18.12	143	-18.12	22	891	442	C	GO:0005625	soluble fraction
spu-miR-9	comp10474_c0_seq3	ACAC_CHICK	ACAC_CHICK Acetyl-CoA carboxylase OS=Gallus gallus GN=ACAC PE=1 SV=1	143	-18.12	143	-18.12	22	891	442	C	GO:0005829	cytosol
spu-miR-9	comp10474_c0_seq3	ACAC_CHICK	ACAC_CHICK Acetyl-CoA carboxylase OS=Gallus gallus GN=ACAC PE=1 SV=1	143	-18.12	143	-18.12	22	891	442	F	GO:0005524	ATP binding
spu-miR-9	comp10474_c0_seq3	ACAC_CHICK	ACAC_CHICK Acetyl-CoA carboxylase OS=Gallus gallus GN=ACAC PE=1 SV=1	143	-18.12	143	-18.12	22	891	442	F	GO:0019900	kinase binding
spu-miR-9	comp10474_c0_seq3	ACAC_CHICK	ACAC_CHICK Acetyl-CoA carboxylase OS=Gallus gallus GN=ACAC PE=1 SV=1	143	-18.12	143	-18.12	22	891	442	C	GO:0005739	mitochondrion
spu-miR-9	comp10474_c0_seq3	ACAC_CHICK	ACAC_CHICK Acetyl-CoA carboxylase OS=Gallus gallus GN=ACAC PE=1 SV=1	143	-18.12	143	-18.12	22	891	442	P	GO:0001894	tissue homeostasis
spu-miR-9	comp10474_c0_seq3	ACAC_CHICK	ACAC_CHICK Acetyl-CoA carboxylase OS=Gallus gallus GN=ACAC PE=1 SV=1	143	-18.12	143	-18.12	22	891	442	P	GO:0006090	pyruvate metabolic process
spu-miR-9	comp10474_c0_seq3	ACAC_CHICK	ACAC_CHICK Acetyl-CoA carboxylase OS=Gallus gallus GN=ACAC PE=1 SV=1	143	-18.12	143	-18.12	22	891	442	C	GO:0009343	biotin carboxylase complex
spu-miR-9	comp10474_c0_seq3	ACAC_CHICK	ACAC_CHICK Acetyl-CoA carboxylase OS=Gallus gallus GN=ACAC PE=1 SV=1	143	-18.12	143	-18.12	22	891	442	P	GO:0019432	triglyceride biosynthetic process
spu-miR-9	comp10474_c0_seq3	ACAC_CHICK	ACAC_CHICK Acetyl-CoA carboxylase OS=Gallus gallus GN=ACAC PE=1 SV=1	143	-18.12	143	-18.12	22	891	442	F	GO:0046872	metal ion binding
spu-miR-9	comp10474_c0_seq3	ACAC_CHICK	ACAC_CHICK Acetyl-CoA carboxylase OS=Gallus gallus GN=ACAC PE=1 SV=1	143	-18.12	143	-18.12	22	891	442	P	GO:0006853	carnitine shuttle
spu-miR-7	comp10474_c0_seq3	ACAC_CHICK	ACAC_CHICK Acetyl-CoA carboxylase OS=Gallus gallus GN=ACAC PE=1 SV=1	144	-18.48	144	-18.48	23	891	76	P	GO:0006112	energy reserve metabolic process
spu-miR-7	comp10474_c0_seq3	ACAC_CHICK	ACAC_CHICK Acetyl-CoA carboxylase OS=Gallus gallus GN=ACAC PE=1 SV=1	144	-18.48	144	-18.48	23	891	76	P	GO:0055088	lipid homeostasis
spu-miR-7	comp10474_c0_seq3	ACAC_CHICK	ACAC_CHICK Acetyl-CoA carboxylase OS=Gallus gallus GN=ACAC PE=1 SV=1	144	-18.48	144	-18.48	23	891	76	F	GO:0004075	biotin carboxylase activity
spu-miR-7	comp10474_c0_seq3	ACAC_CHICK	ACAC_CHICK Acetyl-CoA carboxylase OS=Gallus gallus GN=ACAC PE=1 SV=1	144	-18.48	144	-18.48	23	891	76	P	GO:0051289	protein homotetramerization
spu-miR-7	comp10474_c0_seq3	ACAC_CHICK	ACAC_CHICK Acetyl-CoA carboxylase OS=Gallus gallus GN=ACAC PE=1 SV=1	144	-18.48	144	-18.48	23	891	76	C	GO:0016020	membrane
spu-miR-7	comp10474_c0_seq3	ACAC_CHICK	ACAC_CHICK Acetyl-CoA carboxylase OS=Gallus gallus GN=ACAC PE=1 SV=1	144	-18.48	144	-18.48	23	891	76	P	GO:0031325	positive regulation of cellular metabolic process
spu-miR-7	comp10474_c0_seq3	ACAC_CHICK	ACAC_CHICK Acetyl-CoA carboxylase OS=Gallus gallus GN=ACAC PE=1 SV=1	144	-18.48	144	-18.48	23	891	76	P	GO:0006633	fatty acid biosynthetic process
spu-miR-7	comp10474_c0_seq3	ACAC_CHICK	ACAC_CHICK Acetyl-CoA carboxylase OS=Gallus gallus GN=ACAC PE=1 SV=1	144	-18.48	144	-18.48	23	891	76	F	GO:0003989	acetyl-CoA carboxylase activity
spu-miR-7	comp10474_c0_seq3	ACAC_CHICK	ACAC_CHICK Acetyl-CoA carboxylase OS=Gallus gallus GN=ACAC PE=1 SV=1	144	-18.48	144	-18.48	23	891	76	F	GO:0009374	biotin binding
spu-miR-7	comp10474_c0_seq3	ACAC_CHICK	ACAC_CHICK Acetyl-CoA carboxylase OS=Gallus gallus GN=ACAC PE=1 SV=1	144	-18.48	144	-18.48	23	891	76	P	GO:0006084	acetyl-CoA metabolic process
spu-miR-7	comp10474_c0_seq3	ACAC_CHICK	ACAC_CHICK Acetyl-CoA carboxylase OS=Gallus gallus GN=ACAC PE=1 SV=1	144	-18.48	144	-18.48	23	891	76	P	GO:0014070	response to organic cyclic compound
spu-miR-7	comp10474_c0_seq3	ACAC_CHICK	ACAC_CHICK Acetyl-CoA carboxylase OS=Gallus gallus GN=ACAC PE=1 SV=1	144	-18.48	144	-18.48	23	891	76	P	GO:0046320	regulation of fatty acid oxidation
spu-miR-7	comp10474_c0_seq3	ACAC_CHICK	ACAC_CHICK Acetyl-CoA carboxylase OS=Gallus gallus GN=ACAC PE=1 SV=1	144	-18.48	144	-18.48	23	891	76	P	GO:0044268	multicellular organismal protein metabolic process
spu-miR-7	comp10474_c0_seq3	ACAC_CHICK	ACAC_CHICK Acetyl-CoA carboxylase OS=Gallus gallus GN=ACAC PE=1 SV=1	144	-18.48	144	-18.48	23	891	76	P	GO:0042493	response to drug
spu-miR-7	comp10474_c0_seq3	ACAC_CHICK	ACAC_CHICK Acetyl-CoA carboxylase OS=Gallus gallus GN=ACAC PE=1 SV=1	144	-18.48	144	-18.48	23	891	76	C	GO:0012505	endomembrane system
spu-miR-7	comp10474_c0_seq3	ACAC_CHICK	ACAC_CHICK Acetyl-CoA carboxylase OS=Gallus gallus GN=ACAC PE=1 SV=1	144	-18.48	144	-18.48	23	891	76	C	GO:0005794	Golgi apparatus
spu-miR-7	comp10474_c0_seq3	ACAC_CHICK	ACAC_CHICK Acetyl-CoA carboxylase OS=Gallus gallus GN=ACAC PE=1 SV=1	144	-18.48	144	-18.48	23	891	76	C	GO:0005625	soluble fraction
spu-miR-7	comp10474_c0_seq3	ACAC_CHICK	ACAC_CHICK Acetyl-CoA carboxylase OS=Gallus gallus GN=ACAC PE=1 SV=1	144	-18.48	144	-18.48	23	891	76	C	GO:0005829	cytosol
spu-miR-7	comp10474_c0_seq3	ACAC_CHICK	ACAC_CHICK Acetyl-CoA carboxylase OS=Gallus gallus GN=ACAC PE=1 SV=1	144	-18.48	144	-18.48	23	891	76	F	GO:0005524	ATP binding
spu-miR-7	comp10474_c0_seq3	ACAC_CHICK	ACAC_CHICK Acetyl-CoA carboxylase OS=Gallus gallus GN=ACAC PE=1 SV=1	144	-18.48	144	-18.48	23	891	76	F	GO:0019900	kinase binding
spu-miR-7	comp10474_c0_seq3	ACAC_CHICK	ACAC_CHICK Acetyl-CoA carboxylase OS=Gallus gallus GN=ACAC PE=1 SV=1	144	-18.48	144	-18.48	23	891	76	C	GO:0005739	mitochondrion
spu-miR-7	comp10474_c0_seq3	ACAC_CHICK	ACAC_CHICK Acetyl-CoA carboxylase OS=Gallus gallus GN=ACAC PE=1 SV=1	144	-18.48	144	-18.48	23	891	76	P	GO:0001894	tissue homeostasis
spu-miR-7	comp10474_c0_seq3	ACAC_CHICK	ACAC_CHICK Acetyl-CoA carboxylase OS=Gallus gallus GN=ACAC PE=1 SV=1	144	-18.48	144	-18.48	23	891	76	P	GO:0006090	pyruvate metabolic process
spu-miR-7	comp10474_c0_seq3	ACAC_CHICK	ACAC_CHICK Acetyl-CoA carboxylase OS=Gallus gallus GN=ACAC PE=1 SV=1	144	-18.48	144	-18.48	23	891	76	C	GO:0009343	biotin carboxylase complex
spu-miR-7	comp10474_c0_seq3	ACAC_CHICK	ACAC_CHICK Acetyl-CoA carboxylase OS=Gallus gallus GN=ACAC PE=1 SV=1	144	-18.48	144	-18.48	23	891	76	P	GO:0019432	triglyceride biosynthetic process
spu-miR-7	comp10474_c0_seq3	ACAC_CHICK	ACAC_CHICK Acetyl-CoA carboxylase OS=Gallus gallus GN=ACAC PE=1 SV=1	144	-18.48	144	-18.48	23	891	76	F	GO:0046872	metal ion binding
spu-miR-7	comp10474_c0_seq3	ACAC_CHICK	ACAC_CHICK Acetyl-CoA carboxylase OS=Gallus gallus GN=ACAC PE=1 SV=1	144	-18.48	144	-18.48	23	891	76	P	GO:0006853	carnitine shuttle
spu-miR-124	comp10510_c0_seq4	F1S0R7_PIG	F1S0R7_PIG Uncharacterized protein OS=Sus scrofa GN=NSUN2 PE=4 SV=1	140	-18.86	140	-18.86	21	642	148	C	GO:0044424	intracellular part
spu-miR-124	comp10510_c0_seq4	F1S0R7_PIG	F1S0R7_PIG Uncharacterized protein OS=Sus scrofa GN=NSUN2 PE=4 SV=1	140	-18.86	140	-18.86	21	642	148	F	GO:0016740	transferase activity
spu-miR-124	comp10510_c0_seq4	F1S0R7_PIG	F1S0R7_PIG Uncharacterized protein OS=Sus scrofa GN=NSUN2 PE=4 SV=1	140	-18.86	140	-18.86	21	642	148	P	GO:0000003	reproduction
spu-miR-278	comp10510_c0_seq4	F1S0R7_PIG	F1S0R7_PIG Uncharacterized protein OS=Sus scrofa GN=NSUN2 PE=4 SV=1	143	-21.23	143	-21.23	22	642	1	C	GO:0044424	intracellular part
spu-miR-278	comp10510_c0_seq4	F1S0R7_PIG	F1S0R7_PIG Uncharacterized protein OS=Sus scrofa GN=NSUN2 PE=4 SV=1	143	-21.23	143	-21.23	22	642	1	F	GO:0016740	transferase activity
spu-miR-278	comp10510_c0_seq4	F1S0R7_PIG	F1S0R7_PIG Uncharacterized protein OS=Sus scrofa GN=NSUN2 PE=4 SV=1	143	-21.23	143	-21.23	22	642	1	P	GO:0000003	reproduction
spu-miR-184	comp10510_c0_seq4	F1S0R7_PIG	F1S0R7_PIG Uncharacterized protein OS=Sus scrofa GN=NSUN2 PE=4 SV=1	153	-18.26	153	-18.26	22	642	413	C	GO:0044424	intracellular part
spu-miR-184	comp10510_c0_seq4	F1S0R7_PIG	F1S0R7_PIG Uncharacterized protein OS=Sus scrofa GN=NSUN2 PE=4 SV=1	153	-18.26	153	-18.26	22	642	413	F	GO:0016740	transferase activity
spu-miR-184	comp10510_c0_seq4	F1S0R7_PIG	F1S0R7_PIG Uncharacterized protein OS=Sus scrofa GN=NSUN2 PE=4 SV=1	153	-18.26	153	-18.26	22	642	413	P	GO:0000003	reproduction
spu-miR-2011	comp10510_c0_seq4	F1S0R7_PIG	F1S0R7_PIG Uncharacterized protein OS=Sus scrofa GN=NSUN2 PE=4 SV=1	140	-22.24	140	-22.24	22	642	105	C	GO:0044424	intracellular part
spu-miR-2011	comp10510_c0_seq4	F1S0R7_PIG	F1S0R7_PIG Uncharacterized protein OS=Sus scrofa GN=NSUN2 PE=4 SV=1	140	-22.24	140	-22.24	22	642	105	F	GO:0016740	transferase activity
spu-miR-2011	comp10510_c0_seq4	F1S0R7_PIG	F1S0R7_PIG Uncharacterized protein OS=Sus scrofa GN=NSUN2 PE=4 SV=1	140	-22.24	140	-22.24	22	642	105	P	GO:0000003	reproduction
spu-miR-4851	comp10510_c0_seq4	F1S0R7_PIG	F1S0R7_PIG Uncharacterized protein OS=Sus scrofa GN=NSUN2 PE=4 SV=1	149	-20.2	149	-20.2	23	642	222	C	GO:0044424	intracellular part
spu-miR-4851	comp10510_c0_seq4	F1S0R7_PIG	F1S0R7_PIG Uncharacterized protein OS=Sus scrofa GN=NSUN2 PE=4 SV=1	149	-20.2	149	-20.2	23	642	222	F	GO:0016740	transferase activity
spu-miR-4851	comp10510_c0_seq4	F1S0R7_PIG	F1S0R7_PIG Uncharacterized protein OS=Sus scrofa GN=NSUN2 PE=4 SV=1	149	-20.2	149	-20.2	23	642	222	P	GO:0000003	reproduction
spu-miR-4850	comp10510_c0_seq4	F1S0R7_PIG	F1S0R7_PIG Uncharacterized protein OS=Sus scrofa GN=NSUN2 PE=4 SV=1	143	-18.24	143	-18.24	23	642	104	C	GO:0044424	intracellular part
spu-miR-4850	comp10510_c0_seq4	F1S0R7_PIG	F1S0R7_PIG Uncharacterized protein OS=Sus scrofa GN=NSUN2 PE=4 SV=1	143	-18.24	143	-18.24	23	642	104	F	GO:0016740	transferase activity
spu-miR-4850	comp10510_c0_seq4	F1S0R7_PIG	F1S0R7_PIG Uncharacterized protein OS=Sus scrofa GN=NSUN2 PE=4 SV=1	143	-18.24	143	-18.24	23	642	104	P	GO:0000003	reproduction
spu-miR-4853	comp10510_c0_seq4	F1S0R7_PIG	F1S0R7_PIG Uncharacterized protein OS=Sus scrofa GN=NSUN2 PE=4 SV=1	143	-21.66	143	-21.66	24	642	24	C	GO:0044424	intracellular part
spu-miR-4853	comp10510_c0_seq4	F1S0R7_PIG	F1S0R7_PIG Uncharacterized protein OS=Sus scrofa GN=NSUN2 PE=4 SV=1	143	-21.66	143	-21.66	24	642	24	F	GO:0016740	transferase activity
spu-miR-4853	comp10510_c0_seq4	F1S0R7_PIG	F1S0R7_PIG Uncharacterized protein OS=Sus scrofa GN=NSUN2 PE=4 SV=1	143	-21.66	143	-21.66	24	642	24	P	GO:0000003	reproduction
spu-let-7	comp10510_c0_seq4	F1S0R7_PIG	F1S0R7_PIG Uncharacterized protein OS=Sus scrofa GN=NSUN2 PE=4 SV=1	140	-19.26	140	-19.26	22	642	90	C	GO:0044424	intracellular part
spu-let-7	comp10510_c0_seq4	F1S0R7_PIG	F1S0R7_PIG Uncharacterized protein OS=Sus scrofa GN=NSUN2 PE=4 SV=1	140	-19.26	140	-19.26	22	642	90	F	GO:0016740	transferase activity
spu-let-7	comp10510_c0_seq4	F1S0R7_PIG	F1S0R7_PIG Uncharacterized protein OS=Sus scrofa GN=NSUN2 PE=4 SV=1	140	-19.26	140	-19.26	22	642	90	P	GO:0000003	reproduction
spu-miR-182	comp10566_c0_seq1	TIMP1_BOVIN	TIMP1_BOVIN Metalloproteinase inhibitor 1 OS=Bos taurus GN=TIMP1 PE=1 SV=1	306	-33.02	165	-17.7	25	2612	497 1533	P	GO:0048731	system development
spu-miR-182	comp10566_c0_seq1	TIMP1_BOVIN	TIMP1_BOVIN Metalloproteinase inhibitor 1 OS=Bos taurus GN=TIMP1 PE=1 SV=1	306	-33.02	165	-17.7	25	2612	497 1533	F	GO:0004857	enzyme inhibitor activity
spu-miR-182	comp10566_c0_seq1	TIMP1_BOVIN	TIMP1_BOVIN Metalloproteinase inhibitor 1 OS=Bos taurus GN=TIMP1 PE=1 SV=1	306	-33.02	165	-17.7	25	2612	497 1533	P	GO:0009725	response to hormone stimulus
spu-miR-182	comp10566_c0_seq1	TIMP1_BOVIN	TIMP1_BOVIN Metalloproteinase inhibitor 1 OS=Bos taurus GN=TIMP1 PE=1 SV=1	306	-33.02	165	-17.7	25	2612	497 1533	P	GO:0045861	negative regulation of proteolysis
spu-miR-182	comp10566_c0_seq1	TIMP1_BOVIN	TIMP1_BOVIN Metalloproteinase inhibitor 1 OS=Bos taurus GN=TIMP1 PE=1 SV=1	306	-33.02	165	-17.7	25	2612	497 1533	P	GO:0042060	wound healing
spu-miR-182	comp10566_c0_seq1	TIMP1_BOVIN	TIMP1_BOVIN Metalloproteinase inhibitor 1 OS=Bos taurus GN=TIMP1 PE=1 SV=1	306	-33.02	165	-17.7	25	2612	497 1533	C	GO:0005576	extracellular region
spu-miR-182	comp10566_c0_seq1	TIMP1_BOVIN	TIMP1_BOVIN Metalloproteinase inhibitor 1 OS=Bos taurus GN=TIMP1 PE=1 SV=1	306	-33.02	165	-17.7	25	2612	497 1533	C	GO:0044464	cell part
spu-miR-182	comp10566_c0_seq1	TIMP1_BOVIN	TIMP1_BOVIN Metalloproteinase inhibitor 1 OS=Bos taurus GN=TIMP1 PE=1 SV=1	306	-33.02	165	-17.7	25	2612	497 1533	P	GO:0065008	regulation of biological quality
spu-miR-182	comp10566_c0_seq1	TIMP1_BOVIN	TIMP1_BOVIN Metalloproteinase inhibitor 1 OS=Bos taurus GN=TIMP1 PE=1 SV=1	306	-33.02	165	-17.7	25	2612	497 1533	F	GO:0005515	protein binding
spu-miR-124	comp10566_c0_seq1	TIMP1_BOVIN	TIMP1_BOVIN Metalloproteinase inhibitor 1 OS=Bos taurus GN=TIMP1 PE=1 SV=1	156	-20.97	156	-20.97	21	2612	895	P	GO:0048731	system development
spu-miR-124	comp10566_c0_seq1	TIMP1_BOVIN	TIMP1_BOVIN Metalloproteinase inhibitor 1 OS=Bos taurus GN=TIMP1 PE=1 SV=1	156	-20.97	156	-20.97	21	2612	895	F	GO:0004857	enzyme inhibitor activity
spu-miR-124	comp10566_c0_seq1	TIMP1_BOVIN	TIMP1_BOVIN Metalloproteinase inhibitor 1 OS=Bos taurus GN=TIMP1 PE=1 SV=1	156	-20.97	156	-20.97	21	2612	895	P	GO:0009725	response to hormone stimulus
spu-miR-124	comp10566_c0_seq1	TIMP1_BOVIN	TIMP1_BOVIN Metalloproteinase inhibitor 1 OS=Bos taurus GN=TIMP1 PE=1 SV=1	156	-20.97	156	-20.97	21	2612	895	P	GO:0045861	negative regulation of proteolysis
spu-miR-124	comp10566_c0_seq1	TIMP1_BOVIN	TIMP1_BOVIN Metalloproteinase inhibitor 1 OS=Bos taurus GN=TIMP1 PE=1 SV=1	156	-20.97	156	-20.97	21	2612	895	P	GO:0042060	wound healing
spu-miR-124	comp10566_c0_seq1	TIMP1_BOVIN	TIMP1_BOVIN Metalloproteinase inhibitor 1 OS=Bos taurus GN=TIMP1 PE=1 SV=1	156	-20.97	156	-20.97	21	2612	895	C	GO:0005576	extracellular region
spu-miR-124	comp10566_c0_seq1	TIMP1_BOVIN	TIMP1_BOVIN Metalloproteinase inhibitor 1 OS=Bos taurus GN=TIMP1 PE=1 SV=1	156	-20.97	156	-20.97	21	2612	895	C	GO:0044464	cell part
spu-miR-124	comp10566_c0_seq1	TIMP1_BOVIN	TIMP1_BOVIN Metalloproteinase inhibitor 1 OS=Bos taurus GN=TIMP1 PE=1 SV=1	156	-20.97	156	-20.97	21	2612	895	P	GO:0065008	regulation of biological quality
spu-miR-124	comp10566_c0_seq1	TIMP1_BOVIN	TIMP1_BOVIN Metalloproteinase inhibitor 1 OS=Bos taurus GN=TIMP1 PE=1 SV=1	156	-20.97	156	-20.97	21	2612	895	F	GO:0005515	protein binding
spu-miR-133	comp10566_c0_seq1	TIMP1_BOVIN	TIMP1_BOVIN Metalloproteinase inhibitor 1 OS=Bos taurus GN=TIMP1 PE=1 SV=1	147	-19.67	147	-19.67	23	2612	1506	P	GO:0048731	system development
spu-miR-133	comp10566_c0_seq1	TIMP1_BOVIN	TIMP1_BOVIN Metalloproteinase inhibitor 1 OS=Bos taurus GN=TIMP1 PE=1 SV=1	147	-19.67	147	-19.67	23	2612	1506	F	GO:0004857	enzyme inhibitor activity
spu-miR-133	comp10566_c0_seq1	TIMP1_BOVIN	TIMP1_BOVIN Metalloproteinase inhibitor 1 OS=Bos taurus GN=TIMP1 PE=1 SV=1	147	-19.67	147	-19.67	23	2612	1506	P	GO:0009725	response to hormone stimulus
spu-miR-133	comp10566_c0_seq1	TIMP1_BOVIN	TIMP1_BOVIN Metalloproteinase inhibitor 1 OS=Bos taurus GN=TIMP1 PE=1 SV=1	147	-19.67	147	-19.67	23	2612	1506	P	GO:0045861	negative regulation of proteolysis
spu-miR-133	comp10566_c0_seq1	TIMP1_BOVIN	TIMP1_BOVIN Metalloproteinase inhibitor 1 OS=Bos taurus GN=TIMP1 PE=1 SV=1	147	-19.67	147	-19.67	23	2612	1506	P	GO:0042060	wound healing
spu-miR-133	comp10566_c0_seq1	TIMP1_BOVIN	TIMP1_BOVIN Metalloproteinase inhibitor 1 OS=Bos taurus GN=TIMP1 PE=1 SV=1	147	-19.67	147	-19.67	23	2612	1506	C	GO:0005576	extracellular region
spu-miR-133	comp10566_c0_seq1	TIMP1_BOVIN	TIMP1_BOVIN Metalloproteinase inhibitor 1 OS=Bos taurus GN=TIMP1 PE=1 SV=1	147	-19.67	147	-19.67	23	2612	1506	C	GO:0044464	cell part
spu-miR-133	comp10566_c0_seq1	TIMP1_BOVIN	TIMP1_BOVIN Metalloproteinase inhibitor 1 OS=Bos taurus GN=TIMP1 PE=1 SV=1	147	-19.67	147	-19.67	23	2612	1506	P	GO:0065008	regulation of biological quality
spu-miR-133	comp10566_c0_seq1	TIMP1_BOVIN	TIMP1_BOVIN Metalloproteinase inhibitor 1 OS=Bos taurus GN=TIMP1 PE=1 SV=1	147	-19.67	147	-19.67	23	2612	1506	F	GO:0005515	protein binding
spu-miR-4847	comp10566_c0_seq1	TIMP1_BOVIN	TIMP1_BOVIN Metalloproteinase inhibitor 1 OS=Bos taurus GN=TIMP1 PE=1 SV=1	147	-21.14	147	-21.14	22	2612	1712	P	GO:0048731	system development
spu-miR-4847	comp10566_c0_seq1	TIMP1_BOVIN	TIMP1_BOVIN Metalloproteinase inhibitor 1 OS=Bos taurus GN=TIMP1 PE=1 SV=1	147	-21.14	147	-21.14	22	2612	1712	F	GO:0004857	enzyme inhibitor activity
spu-miR-4847	comp10566_c0_seq1	TIMP1_BOVIN	TIMP1_BOVIN Metalloproteinase inhibitor 1 OS=Bos taurus GN=TIMP1 PE=1 SV=1	147	-21.14	147	-21.14	22	2612	1712	P	GO:0009725	response to hormone stimulus
spu-miR-4847	comp10566_c0_seq1	TIMP1_BOVIN	TIMP1_BOVIN Metalloproteinase inhibitor 1 OS=Bos taurus GN=TIMP1 PE=1 SV=1	147	-21.14	147	-21.14	22	2612	1712	P	GO:0045861	negative regulation of proteolysis
spu-miR-4847	comp10566_c0_seq1	TIMP1_BOVIN	TIMP1_BOVIN Metalloproteinase inhibitor 1 OS=Bos taurus GN=TIMP1 PE=1 SV=1	147	-21.14	147	-21.14	22	2612	1712	P	GO:0042060	wound healing
spu-miR-4847	comp10566_c0_seq1	TIMP1_BOVIN	TIMP1_BOVIN Metalloproteinase inhibitor 1 OS=Bos taurus GN=TIMP1 PE=1 SV=1	147	-21.14	147	-21.14	22	2612	1712	C	GO:0005576	extracellular region
spu-miR-4847	comp10566_c0_seq1	TIMP1_BOVIN	TIMP1_BOVIN Metalloproteinase inhibitor 1 OS=Bos taurus GN=TIMP1 PE=1 SV=1	147	-21.14	147	-21.14	22	2612	1712	C	GO:0044464	cell part
spu-miR-4847	comp10566_c0_seq1	TIMP1_BOVIN	TIMP1_BOVIN Metalloproteinase inhibitor 1 OS=Bos taurus GN=TIMP1 PE=1 SV=1	147	-21.14	147	-21.14	22	2612	1712	P	GO:0065008	regulation of biological quality
spu-miR-4847	comp10566_c0_seq1	TIMP1_BOVIN	TIMP1_BOVIN Metalloproteinase inhibitor 1 OS=Bos taurus GN=TIMP1 PE=1 SV=1	147	-21.14	147	-21.14	22	2612	1712	F	GO:0005515	protein binding
spu-miR-34	comp10566_c0_seq1	TIMP1_BOVIN	TIMP1_BOVIN Metalloproteinase inhibitor 1 OS=Bos taurus GN=TIMP1 PE=1 SV=1	152	-19.78	152	-19.78	22	2612	1628	P	GO:0048731	system development
spu-miR-34	comp10566_c0_seq1	TIMP1_BOVIN	TIMP1_BOVIN Metalloproteinase inhibitor 1 OS=Bos taurus GN=TIMP1 PE=1 SV=1	152	-19.78	152	-19.78	22	2612	1628	F	GO:0004857	enzyme inhibitor activity
spu-miR-34	comp10566_c0_seq1	TIMP1_BOVIN	TIMP1_BOVIN Metalloproteinase inhibitor 1 OS=Bos taurus GN=TIMP1 PE=1 SV=1	152	-19.78	152	-19.78	22	2612	1628	P	GO:0009725	response to hormone stimulus
spu-miR-34	comp10566_c0_seq1	TIMP1_BOVIN	TIMP1_BOVIN Metalloproteinase inhibitor 1 OS=Bos taurus GN=TIMP1 PE=1 SV=1	152	-19.78	152	-19.78	22	2612	1628	P	GO:0045861	negative regulation of proteolysis
spu-miR-34	comp10566_c0_seq1	TIMP1_BOVIN	TIMP1_BOVIN Metalloproteinase inhibitor 1 OS=Bos taurus GN=TIMP1 PE=1 SV=1	152	-19.78	152	-19.78	22	2612	1628	P	GO:0042060	wound healing
spu-miR-34	comp10566_c0_seq1	TIMP1_BOVIN	TIMP1_BOVIN Metalloproteinase inhibitor 1 OS=Bos taurus GN=TIMP1 PE=1 SV=1	152	-19.78	152	-19.78	22	2612	1628	C	GO:0005576	extracellular region
spu-miR-34	comp10566_c0_seq1	TIMP1_BOVIN	TIMP1_BOVIN Metalloproteinase inhibitor 1 OS=Bos taurus GN=TIMP1 PE=1 SV=1	152	-19.78	152	-19.78	22	2612	1628	C	GO:0044464	cell part
spu-miR-34	comp10566_c0_seq1	TIMP1_BOVIN	TIMP1_BOVIN Metalloproteinase inhibitor 1 OS=Bos taurus GN=TIMP1 PE=1 SV=1	152	-19.78	152	-19.78	22	2612	1628	P	GO:0065008	regulation of biological quality
spu-miR-34	comp10566_c0_seq1	TIMP1_BOVIN	TIMP1_BOVIN Metalloproteinase inhibitor 1 OS=Bos taurus GN=TIMP1 PE=1 SV=1	152	-19.78	152	-19.78	22	2612	1628	F	GO:0005515	protein binding
spu-miR-Scaffold53378_527	comp10566_c0_seq1	TIMP1_BOVIN	TIMP1_BOVIN Metalloproteinase inhibitor 1 OS=Bos taurus GN=TIMP1 PE=1 SV=1	595	-51.99	162	-16.53	24	2612	36 1297 134 762	P	GO:0048731	system development
spu-miR-Scaffold53378_527	comp10566_c0_seq1	TIMP1_BOVIN	TIMP1_BOVIN Metalloproteinase inhibitor 1 OS=Bos taurus GN=TIMP1 PE=1 SV=1	595	-51.99	162	-16.53	24	2612	36 1297 134 762	F	GO:0004857	enzyme inhibitor activity
spu-miR-Scaffold53378_527	comp10566_c0_seq1	TIMP1_BOVIN	TIMP1_BOVIN Metalloproteinase inhibitor 1 OS=Bos taurus GN=TIMP1 PE=1 SV=1	595	-51.99	162	-16.53	24	2612	36 1297 134 762	P	GO:0009725	response to hormone stimulus
spu-miR-Scaffold53378_527	comp10566_c0_seq1	TIMP1_BOVIN	TIMP1_BOVIN Metalloproteinase inhibitor 1 OS=Bos taurus GN=TIMP1 PE=1 SV=1	595	-51.99	162	-16.53	24	2612	36 1297 134 762	P	GO:0045861	negative regulation of proteolysis
spu-miR-Scaffold53378_527	comp10566_c0_seq1	TIMP1_BOVIN	TIMP1_BOVIN Metalloproteinase inhibitor 1 OS=Bos taurus GN=TIMP1 PE=1 SV=1	595	-51.99	162	-16.53	24	2612	36 1297 134 762	P	GO:0042060	wound healing
spu-miR-Scaffold53378_527	comp10566_c0_seq1	TIMP1_BOVIN	TIMP1_BOVIN Metalloproteinase inhibitor 1 OS=Bos taurus GN=TIMP1 PE=1 SV=1	595	-51.99	162	-16.53	24	2612	36 1297 134 762	C	GO:0005576	extracellular region
spu-miR-Scaffold53378_527	comp10566_c0_seq1	TIMP1_BOVIN	TIMP1_BOVIN Metalloproteinase inhibitor 1 OS=Bos taurus GN=TIMP1 PE=1 SV=1	595	-51.99	162	-16.53	24	2612	36 1297 134 762	C	GO:0044464	cell part
spu-miR-Scaffold53378_527	comp10566_c0_seq1	TIMP1_BOVIN	TIMP1_BOVIN Metalloproteinase inhibitor 1 OS=Bos taurus GN=TIMP1 PE=1 SV=1	595	-51.99	162	-16.53	24	2612	36 1297 134 762	P	GO:0065008	regulation of biological quality
spu-miR-Scaffold53378_527	comp10566_c0_seq1	TIMP1_BOVIN	TIMP1_BOVIN Metalloproteinase inhibitor 1 OS=Bos taurus GN=TIMP1 PE=1 SV=1	595	-51.99	162	-16.53	24	2612	36 1297 134 762	F	GO:0005515	protein binding
spu-miR-182	comp108_c2_seq13	FCN1_HUMAN	FCN1_HUMAN Ficolin-1 OS=Homo sapiens GN=FCN1 PE=1 SV=2	167	-18.51	167	-18.51	25	306	85	C	GO:0019814	immunoglobulin complex
spu-miR-182	comp108_c2_seq13	FCN1_HUMAN	FCN1_HUMAN Ficolin-1 OS=Homo sapiens GN=FCN1 PE=1 SV=2	167	-18.51	167	-18.51	25	306	85	P	GO:0007275	multicellular organismal development
spu-miR-182	comp108_c2_seq13	FCN1_HUMAN	FCN1_HUMAN Ficolin-1 OS=Homo sapiens GN=FCN1 PE=1 SV=2	167	-18.51	167	-18.51	25	306	85	P	GO:0050789	regulation of biological process
spu-miR-182	comp108_c2_seq13	FCN1_HUMAN	FCN1_HUMAN Ficolin-1 OS=Homo sapiens GN=FCN1 PE=1 SV=2	167	-18.51	167	-18.51	25	306	85	F	GO:0003823	antigen binding
spu-miR-182	comp108_c2_seq13	FCN1_HUMAN	FCN1_HUMAN Ficolin-1 OS=Homo sapiens GN=FCN1 PE=1 SV=2	167	-18.51	167	-18.51	25	306	85	F	GO:0005509	calcium ion binding
spu-miR-182	comp108_c2_seq13	FCN1_HUMAN	FCN1_HUMAN Ficolin-1 OS=Homo sapiens GN=FCN1 PE=1 SV=2	167	-18.51	167	-18.51	25	306	85	C	GO:0044421	extracellular region part
spu-miR-182	comp108_c2_seq13	FCN1_HUMAN	FCN1_HUMAN Ficolin-1 OS=Homo sapiens GN=FCN1 PE=1 SV=2	167	-18.51	167	-18.51	25	306	85	P	GO:0008228	opsonization
spu-miR-182	comp108_c2_seq13	FCN1_HUMAN	FCN1_HUMAN Ficolin-1 OS=Homo sapiens GN=FCN1 PE=1 SV=2	167	-18.51	167	-18.51	25	306	85	F	GO:0048306	calcium-dependent protein binding
spu-miR-182	comp108_c2_seq13	FCN1_HUMAN	FCN1_HUMAN Ficolin-1 OS=Homo sapiens GN=FCN1 PE=1 SV=2	167	-18.51	167	-18.51	25	306	85	P	GO:0006955	immune response
spu-miR-2013	comp108_c2_seq13	FCN1_HUMAN	FCN1_HUMAN Ficolin-1 OS=Homo sapiens GN=FCN1 PE=1 SV=2	149	-19.63	149	-19.63	21	306	73	C	GO:0019814	immunoglobulin complex
spu-miR-2013	comp108_c2_seq13	FCN1_HUMAN	FCN1_HUMAN Ficolin-1 OS=Homo sapiens GN=FCN1 PE=1 SV=2	149	-19.63	149	-19.63	21	306	73	P	GO:0007275	multicellular organismal development
spu-miR-2013	comp108_c2_seq13	FCN1_HUMAN	FCN1_HUMAN Ficolin-1 OS=Homo sapiens GN=FCN1 PE=1 SV=2	149	-19.63	149	-19.63	21	306	73	P	GO:0050789	regulation of biological process
spu-miR-2013	comp108_c2_seq13	FCN1_HUMAN	FCN1_HUMAN Ficolin-1 OS=Homo sapiens GN=FCN1 PE=1 SV=2	149	-19.63	149	-19.63	21	306	73	F	GO:0003823	antigen binding
spu-miR-2013	comp108_c2_seq13	FCN1_HUMAN	FCN1_HUMAN Ficolin-1 OS=Homo sapiens GN=FCN1 PE=1 SV=2	149	-19.63	149	-19.63	21	306	73	F	GO:0005509	calcium ion binding
spu-miR-2013	comp108_c2_seq13	FCN1_HUMAN	FCN1_HUMAN Ficolin-1 OS=Homo sapiens GN=FCN1 PE=1 SV=2	149	-19.63	149	-19.63	21	306	73	C	GO:0044421	extracellular region part
spu-miR-2013	comp108_c2_seq13	FCN1_HUMAN	FCN1_HUMAN Ficolin-1 OS=Homo sapiens GN=FCN1 PE=1 SV=2	149	-19.63	149	-19.63	21	306	73	P	GO:0008228	opsonization
spu-miR-2013	comp108_c2_seq13	FCN1_HUMAN	FCN1_HUMAN Ficolin-1 OS=Homo sapiens GN=FCN1 PE=1 SV=2	149	-19.63	149	-19.63	21	306	73	F	GO:0048306	calcium-dependent protein binding
spu-miR-2013	comp108_c2_seq13	FCN1_HUMAN	FCN1_HUMAN Ficolin-1 OS=Homo sapiens GN=FCN1 PE=1 SV=2	149	-19.63	149	-19.63	21	306	73	P	GO:0006955	immune response
spu-miR-2011	comp108_c2_seq13	FCN1_HUMAN	FCN1_HUMAN Ficolin-1 OS=Homo sapiens GN=FCN1 PE=1 SV=2	146	-18.37	146	-18.37	22	306	52	C	GO:0019814	immunoglobulin complex
spu-miR-2011	comp108_c2_seq13	FCN1_HUMAN	FCN1_HUMAN Ficolin-1 OS=Homo sapiens GN=FCN1 PE=1 SV=2	146	-18.37	146	-18.37	22	306	52	P	GO:0007275	multicellular organismal development
spu-miR-2011	comp108_c2_seq13	FCN1_HUMAN	FCN1_HUMAN Ficolin-1 OS=Homo sapiens GN=FCN1 PE=1 SV=2	146	-18.37	146	-18.37	22	306	52	P	GO:0050789	regulation of biological process
spu-miR-2011	comp108_c2_seq13	FCN1_HUMAN	FCN1_HUMAN Ficolin-1 OS=Homo sapiens GN=FCN1 PE=1 SV=2	146	-18.37	146	-18.37	22	306	52	F	GO:0003823	antigen binding
spu-miR-2011	comp108_c2_seq13	FCN1_HUMAN	FCN1_HUMAN Ficolin-1 OS=Homo sapiens GN=FCN1 PE=1 SV=2	146	-18.37	146	-18.37	22	306	52	F	GO:0005509	calcium ion binding
spu-miR-2011	comp108_c2_seq13	FCN1_HUMAN	FCN1_HUMAN Ficolin-1 OS=Homo sapiens GN=FCN1 PE=1 SV=2	146	-18.37	146	-18.37	22	306	52	C	GO:0044421	extracellular region part
spu-miR-2011	comp108_c2_seq13	FCN1_HUMAN	FCN1_HUMAN Ficolin-1 OS=Homo sapiens GN=FCN1 PE=1 SV=2	146	-18.37	146	-18.37	22	306	52	P	GO:0008228	opsonization
spu-miR-2011	comp108_c2_seq13	FCN1_HUMAN	FCN1_HUMAN Ficolin-1 OS=Homo sapiens GN=FCN1 PE=1 SV=2	146	-18.37	146	-18.37	22	306	52	F	GO:0048306	calcium-dependent protein binding
spu-miR-2011	comp108_c2_seq13	FCN1_HUMAN	FCN1_HUMAN Ficolin-1 OS=Homo sapiens GN=FCN1 PE=1 SV=2	146	-18.37	146	-18.37	22	306	52	P	GO:0006955	immune response
spu-miR-2001	comp108_c2_seq22	TENA_CHICK	TENA_CHICK Tenascin OS=Gallus gallus GN=TNC PE=1 SV=2	147	-25.1	147	-25.1	22	205	3	P	GO:0007155	cell adhesion
spu-miR-2001	comp108_c2_seq22	TENA_CHICK	TENA_CHICK Tenascin OS=Gallus gallus GN=TNC PE=1 SV=2	147	-25.1	147	-25.1	22	205	3	P	GO:0050804	regulation of synaptic transmission
spu-miR-2001	comp108_c2_seq22	TENA_CHICK	TENA_CHICK Tenascin OS=Gallus gallus GN=TNC PE=1 SV=2	147	-25.1	147	-25.1	22	205	3	P	GO:0048523	negative regulation of cellular process
spu-miR-2001	comp108_c2_seq22	TENA_CHICK	TENA_CHICK Tenascin OS=Gallus gallus GN=TNC PE=1 SV=2	147	-25.1	147	-25.1	22	205	3	P	GO:0006979	response to oxidative stress
spu-miR-2001	comp108_c2_seq22	TENA_CHICK	TENA_CHICK Tenascin OS=Gallus gallus GN=TNC PE=1 SV=2	147	-25.1	147	-25.1	22	205	3	F	GO:0045545	syndecan binding
spu-miR-2001	comp108_c2_seq22	TENA_CHICK	TENA_CHICK Tenascin OS=Gallus gallus GN=TNC PE=1 SV=2	147	-25.1	147	-25.1	22	205	3	C	GO:0005578	proteinaceous extracellular matrix
spu-miR-2001	comp108_c2_seq22	TENA_CHICK	TENA_CHICK Tenascin OS=Gallus gallus GN=TNC PE=1 SV=2	147	-25.1	147	-25.1	22	205	3	P	GO:0051971	positive regulation of transmission of nerve impulse
spu-miR-2001	comp108_c2_seq22	TENA_CHICK	TENA_CHICK Tenascin OS=Gallus gallus GN=TNC PE=1 SV=2	147	-25.1	147	-25.1	22	205	3	P	GO:0009611	response to wounding
spu-miR-2001	comp108_c2_seq22	TENA_CHICK	TENA_CHICK Tenascin OS=Gallus gallus GN=TNC PE=1 SV=2	147	-25.1	147	-25.1	22	205	3	P	GO:0048513	organ development
spu-miR-2001	comp108_c2_seq22	TENA_CHICK	TENA_CHICK Tenascin OS=Gallus gallus GN=TNC PE=1 SV=2	147	-25.1	147	-25.1	22	205	3	P	GO:0051716	cellular response to stimulus
spu-miR-2001	comp108_c2_seq22	TENA_CHICK	TENA_CHICK Tenascin OS=Gallus gallus GN=TNC PE=1 SV=2	147	-25.1	147	-25.1	22	205	3	C	GO:0005615	extracellular space
spu-miR-2001	comp108_c2_seq22	TENA_CHICK	TENA_CHICK Tenascin OS=Gallus gallus GN=TNC PE=1 SV=2	147	-25.1	147	-25.1	22	205	3	P	GO:0009653	anatomical structure morphogenesis
spu-miR-2001	comp108_c2_seq22	TENA_CHICK	TENA_CHICK Tenascin OS=Gallus gallus GN=TNC PE=1 SV=2	147	-25.1	147	-25.1	22	205	3	P	GO:0031175	neuron projection development
spu-miR-2007	comp108_c2_seq22	TENA_CHICK	TENA_CHICK Tenascin OS=Gallus gallus GN=TNC PE=1 SV=2	163	-17.58	163	-17.58	23	205	89	P	GO:0007155	cell adhesion
spu-miR-2007	comp108_c2_seq22	TENA_CHICK	TENA_CHICK Tenascin OS=Gallus gallus GN=TNC PE=1 SV=2	163	-17.58	163	-17.58	23	205	89	P	GO:0050804	regulation of synaptic transmission
spu-miR-2007	comp108_c2_seq22	TENA_CHICK	TENA_CHICK Tenascin OS=Gallus gallus GN=TNC PE=1 SV=2	163	-17.58	163	-17.58	23	205	89	P	GO:0048523	negative regulation of cellular process
spu-miR-2007	comp108_c2_seq22	TENA_CHICK	TENA_CHICK Tenascin OS=Gallus gallus GN=TNC PE=1 SV=2	163	-17.58	163	-17.58	23	205	89	P	GO:0006979	response to oxidative stress
spu-miR-2007	comp108_c2_seq22	TENA_CHICK	TENA_CHICK Tenascin OS=Gallus gallus GN=TNC PE=1 SV=2	163	-17.58	163	-17.58	23	205	89	F	GO:0045545	syndecan binding
spu-miR-2007	comp108_c2_seq22	TENA_CHICK	TENA_CHICK Tenascin OS=Gallus gallus GN=TNC PE=1 SV=2	163	-17.58	163	-17.58	23	205	89	C	GO:0005578	proteinaceous extracellular matrix
spu-miR-2007	comp108_c2_seq22	TENA_CHICK	TENA_CHICK Tenascin OS=Gallus gallus GN=TNC PE=1 SV=2	163	-17.58	163	-17.58	23	205	89	P	GO:0051971	positive regulation of transmission of nerve impulse
spu-miR-2007	comp108_c2_seq22	TENA_CHICK	TENA_CHICK Tenascin OS=Gallus gallus GN=TNC PE=1 SV=2	163	-17.58	163	-17.58	23	205	89	P	GO:0009611	response to wounding
spu-miR-2007	comp108_c2_seq22	TENA_CHICK	TENA_CHICK Tenascin OS=Gallus gallus GN=TNC PE=1 SV=2	163	-17.58	163	-17.58	23	205	89	P	GO:0048513	organ development
spu-miR-2007	comp108_c2_seq22	TENA_CHICK	TENA_CHICK Tenascin OS=Gallus gallus GN=TNC PE=1 SV=2	163	-17.58	163	-17.58	23	205	89	P	GO:0051716	cellular response to stimulus
spu-miR-2007	comp108_c2_seq22	TENA_CHICK	TENA_CHICK Tenascin OS=Gallus gallus GN=TNC PE=1 SV=2	163	-17.58	163	-17.58	23	205	89	C	GO:0005615	extracellular space
spu-miR-2007	comp108_c2_seq22	TENA_CHICK	TENA_CHICK Tenascin OS=Gallus gallus GN=TNC PE=1 SV=2	163	-17.58	163	-17.58	23	205	89	P	GO:0009653	anatomical structure morphogenesis
spu-miR-2007	comp108_c2_seq22	TENA_CHICK	TENA_CHICK Tenascin OS=Gallus gallus GN=TNC PE=1 SV=2	163	-17.58	163	-17.58	23	205	89	P	GO:0031175	neuron projection development
spu-miR-2001	comp108_c3_seq1	F1S6Y5_PIG	F1S6Y5_PIG Uncharacterized protein OS=Sus scrofa GN=ANGPTL1 PE=4 SV=1	159	-25.36	159	-25.36	22	904	597	P	GO:0016337	cell-cell adhesion
spu-miR-2001	comp108_c3_seq1	F1S6Y5_PIG	F1S6Y5_PIG Uncharacterized protein OS=Sus scrofa GN=ANGPTL1 PE=4 SV=1	159	-25.36	159	-25.36	22	904	597	P	GO:0007275	multicellular organismal development
spu-miR-2001	comp108_c3_seq1	F1S6Y5_PIG	F1S6Y5_PIG Uncharacterized protein OS=Sus scrofa GN=ANGPTL1 PE=4 SV=1	159	-25.36	159	-25.36	22	904	597	C	GO:0005576	extracellular region
spu-miR-2001	comp108_c3_seq1	F1S6Y5_PIG	F1S6Y5_PIG Uncharacterized protein OS=Sus scrofa GN=ANGPTL1 PE=4 SV=1	159	-25.36	159	-25.36	22	904	597	N	GO:0005529
spu-miR-2005	comp108_c3_seq1	F1S6Y5_PIG	F1S6Y5_PIG Uncharacterized protein OS=Sus scrofa GN=ANGPTL1 PE=4 SV=1	149	-21.06	149	-21.06	24	904	470	P	GO:0016337	cell-cell adhesion
spu-miR-2005	comp108_c3_seq1	F1S6Y5_PIG	F1S6Y5_PIG Uncharacterized protein OS=Sus scrofa GN=ANGPTL1 PE=4 SV=1	149	-21.06	149	-21.06	24	904	470	P	GO:0007275	multicellular organismal development
spu-miR-2005	comp108_c3_seq1	F1S6Y5_PIG	F1S6Y5_PIG Uncharacterized protein OS=Sus scrofa GN=ANGPTL1 PE=4 SV=1	149	-21.06	149	-21.06	24	904	470	C	GO:0005576	extracellular region
spu-miR-2005	comp108_c3_seq1	F1S6Y5_PIG	F1S6Y5_PIG Uncharacterized protein OS=Sus scrofa GN=ANGPTL1 PE=4 SV=1	149	-21.06	149	-21.06	24	904	470	N	GO:0005529
spu-miR-71	comp108_c3_seq1	F1S6Y5_PIG	F1S6Y5_PIG Uncharacterized protein OS=Sus scrofa GN=ANGPTL1 PE=4 SV=1	140	-19.9	140	-19.9	23	904	7	P	GO:0016337	cell-cell adhesion
spu-miR-71	comp108_c3_seq1	F1S6Y5_PIG	F1S6Y5_PIG Uncharacterized protein OS=Sus scrofa GN=ANGPTL1 PE=4 SV=1	140	-19.9	140	-19.9	23	904	7	P	GO:0007275	multicellular organismal development
spu-miR-71	comp108_c3_seq1	F1S6Y5_PIG	F1S6Y5_PIG Uncharacterized protein OS=Sus scrofa GN=ANGPTL1 PE=4 SV=1	140	-19.9	140	-19.9	23	904	7	C	GO:0005576	extracellular region
spu-miR-71	comp108_c3_seq1	F1S6Y5_PIG	F1S6Y5_PIG Uncharacterized protein OS=Sus scrofa GN=ANGPTL1 PE=4 SV=1	140	-19.9	140	-19.9	23	904	7	N	GO:0005529
spu-miR-2001	comp108_c3_seq2	Q9VME7_DROME	Q9VME7_DROME CG9500 OS=Drosophila melanogaster GN=CG9500 PE=2 SV=3	159	-25.36	159	-25.36	22	806	597	P	GO:0016337	cell-cell adhesion
spu-miR-2001	comp108_c3_seq2	Q9VME7_DROME	Q9VME7_DROME CG9500 OS=Drosophila melanogaster GN=CG9500 PE=2 SV=3	159	-25.36	159	-25.36	22	806	597	N	GO:0005529
spu-miR-2005	comp108_c3_seq2	Q9VME7_DROME	Q9VME7_DROME CG9500 OS=Drosophila melanogaster GN=CG9500 PE=2 SV=3	149	-21.06	149	-21.06	24	806	470	P	GO:0016337	cell-cell adhesion
spu-miR-2005	comp108_c3_seq2	Q9VME7_DROME	Q9VME7_DROME CG9500 OS=Drosophila melanogaster GN=CG9500 PE=2 SV=3	149	-21.06	149	-21.06	24	806	470	N	GO:0005529
spu-miR-71	comp108_c3_seq2	Q9VME7_DROME	Q9VME7_DROME CG9500 OS=Drosophila melanogaster GN=CG9500 PE=2 SV=3	140	-19.9	140	-19.9	23	806	7	P	GO:0016337	cell-cell adhesion
spu-miR-71	comp108_c3_seq2	Q9VME7_DROME	Q9VME7_DROME CG9500 OS=Drosophila melanogaster GN=CG9500 PE=2 SV=3	140	-19.9	140	-19.9	23	806	7	N	GO:0005529
spu-miR-2008	comp10845_c0_seq2	RFC2_HUMAN	RFC2_HUMAN Replication factor C subunit 2 OS=Homo sapiens GN=RFC2 PE=1 SV=3	140	-23.32	140	-23.32	21	385	329	F	GO:0005524	ATP binding
spu-miR-2008	comp10845_c0_seq2	RFC2_HUMAN	RFC2_HUMAN Replication factor C subunit 2 OS=Homo sapiens GN=RFC2 PE=1 SV=3	140	-23.32	140	-23.32	21	385	329	C	GO:0005663	DNA replication factor C complex
spu-miR-2008	comp10845_c0_seq2	RFC2_HUMAN	RFC2_HUMAN Replication factor C subunit 2 OS=Homo sapiens GN=RFC2 PE=1 SV=3	140	-23.32	140	-23.32	21	385	329	C	GO:0042575	DNA polymerase complex
spu-miR-2008	comp10845_c0_seq2	RFC2_HUMAN	RFC2_HUMAN Replication factor C subunit 2 OS=Homo sapiens GN=RFC2 PE=1 SV=3	140	-23.32	140	-23.32	21	385	329	P	GO:0006271	DNA strand elongation involved in DNA replication
spu-miR-2008	comp10845_c0_seq2	RFC2_HUMAN	RFC2_HUMAN Replication factor C subunit 2 OS=Homo sapiens GN=RFC2 PE=1 SV=3	140	-23.32	140	-23.32	21	385	329	P	GO:0000075	cell cycle checkpoint
spu-miR-2008	comp10845_c0_seq2	RFC2_HUMAN	RFC2_HUMAN Replication factor C subunit 2 OS=Homo sapiens GN=RFC2 PE=1 SV=3	140	-23.32	140	-23.32	21	385	329	F	GO:0005515	protein binding
spu-miR-2008	comp10845_c0_seq2	RFC2_HUMAN	RFC2_HUMAN Replication factor C subunit 2 OS=Homo sapiens GN=RFC2 PE=1 SV=3	140	-23.32	140	-23.32	21	385	329	P	GO:0006283	transcription-coupled nucleotide-excision repair
spu-miR-2008	comp10845_c0_seq2	RFC2_HUMAN	RFC2_HUMAN Replication factor C subunit 2 OS=Homo sapiens GN=RFC2 PE=1 SV=3	140	-23.32	140	-23.32	21	385	329	P	GO:0040011	locomotion
spu-miR-2008	comp10845_c0_seq2	RFC2_HUMAN	RFC2_HUMAN Replication factor C subunit 2 OS=Homo sapiens GN=RFC2 PE=1 SV=3	140	-23.32	140	-23.32	21	385	329	P	GO:0006297	nucleotide-excision repair, DNA gap filling
spu-miR-2008	comp10845_c0_seq2	RFC2_HUMAN	RFC2_HUMAN Replication factor C subunit 2 OS=Homo sapiens GN=RFC2 PE=1 SV=3	140	-23.32	140	-23.32	21	385	329	P	GO:0009792	embryo development ending in birth or egg hatching
spu-miR-2008	comp10845_c0_seq2	RFC2_HUMAN	RFC2_HUMAN Replication factor C subunit 2 OS=Homo sapiens GN=RFC2 PE=1 SV=3	140	-23.32	140	-23.32	21	385	329	F	GO:0003689	DNA clamp loader activity
spu-miR-2008	comp10845_c0_seq2	RFC2_HUMAN	RFC2_HUMAN Replication factor C subunit 2 OS=Homo sapiens GN=RFC2 PE=1 SV=3	140	-23.32	140	-23.32	21	385	329	P	GO:0000084	S phase of mitotic cell cycle
spu-miR-2008	comp10845_c0_seq2	RFC2_HUMAN	RFC2_HUMAN Replication factor C subunit 2 OS=Homo sapiens GN=RFC2 PE=1 SV=3	140	-23.32	140	-23.32	21	385	329	P	GO:0032201	telomere maintenance via semi-conservative replication
spu-miR-2008	comp10845_c0_seq2	RFC2_HUMAN	RFC2_HUMAN Replication factor C subunit 2 OS=Homo sapiens GN=RFC2 PE=1 SV=3	140	-23.32	140	-23.32	21	385	329	P	GO:0006200	ATP catabolic process
spu-miR-2008	comp10845_c0_seq2	RFC2_HUMAN	RFC2_HUMAN Replication factor C subunit 2 OS=Homo sapiens GN=RFC2 PE=1 SV=3	140	-23.32	140	-23.32	21	385	329	P	GO:0000003	reproduction
spu-miR-2008	comp10845_c0_seq2	RFC2_HUMAN	RFC2_HUMAN Replication factor C subunit 2 OS=Homo sapiens GN=RFC2 PE=1 SV=3	140	-23.32	140	-23.32	21	385	329	C	GO:0005654	nucleoplasm
spu-miR-2008	comp10845_c0_seq2	RFC2_HUMAN	RFC2_HUMAN Replication factor C subunit 2 OS=Homo sapiens GN=RFC2 PE=1 SV=3	140	-23.32	140	-23.32	21	385	329	P	GO:0000722	telomere maintenance via recombination
spu-miR-252a	comp10845_c0_seq2	RFC2_HUMAN	RFC2_HUMAN Replication factor C subunit 2 OS=Homo sapiens GN=RFC2 PE=1 SV=3	159	-27.55	159	-27.55	22	385	156	F	GO:0005524	ATP binding
spu-miR-252a	comp10845_c0_seq2	RFC2_HUMAN	RFC2_HUMAN Replication factor C subunit 2 OS=Homo sapiens GN=RFC2 PE=1 SV=3	159	-27.55	159	-27.55	22	385	156	C	GO:0005663	DNA replication factor C complex
spu-miR-252a	comp10845_c0_seq2	RFC2_HUMAN	RFC2_HUMAN Replication factor C subunit 2 OS=Homo sapiens GN=RFC2 PE=1 SV=3	159	-27.55	159	-27.55	22	385	156	C	GO:0042575	DNA polymerase complex
spu-miR-252a	comp10845_c0_seq2	RFC2_HUMAN	RFC2_HUMAN Replication factor C subunit 2 OS=Homo sapiens GN=RFC2 PE=1 SV=3	159	-27.55	159	-27.55	22	385	156	P	GO:0006271	DNA strand elongation involved in DNA replication
spu-miR-252a	comp10845_c0_seq2	RFC2_HUMAN	RFC2_HUMAN Replication factor C subunit 2 OS=Homo sapiens GN=RFC2 PE=1 SV=3	159	-27.55	159	-27.55	22	385	156	P	GO:0000075	cell cycle checkpoint
spu-miR-252a	comp10845_c0_seq2	RFC2_HUMAN	RFC2_HUMAN Replication factor C subunit 2 OS=Homo sapiens GN=RFC2 PE=1 SV=3	159	-27.55	159	-27.55	22	385	156	F	GO:0005515	protein binding
spu-miR-252a	comp10845_c0_seq2	RFC2_HUMAN	RFC2_HUMAN Replication factor C subunit 2 OS=Homo sapiens GN=RFC2 PE=1 SV=3	159	-27.55	159	-27.55	22	385	156	P	GO:0006283	transcription-coupled nucleotide-excision repair
spu-miR-252a	comp10845_c0_seq2	RFC2_HUMAN	RFC2_HUMAN Replication factor C subunit 2 OS=Homo sapiens GN=RFC2 PE=1 SV=3	159	-27.55	159	-27.55	22	385	156	P	GO:0040011	locomotion
spu-miR-252a	comp10845_c0_seq2	RFC2_HUMAN	RFC2_HUMAN Replication factor C subunit 2 OS=Homo sapiens GN=RFC2 PE=1 SV=3	159	-27.55	159	-27.55	22	385	156	P	GO:0006297	nucleotide-excision repair, DNA gap filling
spu-miR-252a	comp10845_c0_seq2	RFC2_HUMAN	RFC2_HUMAN Replication factor C subunit 2 OS=Homo sapiens GN=RFC2 PE=1 SV=3	159	-27.55	159	-27.55	22	385	156	P	GO:0009792	embryo development ending in birth or egg hatching
spu-miR-252a	comp10845_c0_seq2	RFC2_HUMAN	RFC2_HUMAN Replication factor C subunit 2 OS=Homo sapiens GN=RFC2 PE=1 SV=3	159	-27.55	159	-27.55	22	385	156	F	GO:0003689	DNA clamp loader activity
spu-miR-252a	comp10845_c0_seq2	RFC2_HUMAN	RFC2_HUMAN Replication factor C subunit 2 OS=Homo sapiens GN=RFC2 PE=1 SV=3	159	-27.55	159	-27.55	22	385	156	P	GO:0000084	S phase of mitotic cell cycle
spu-miR-252a	comp10845_c0_seq2	RFC2_HUMAN	RFC2_HUMAN Replication factor C subunit 2 OS=Homo sapiens GN=RFC2 PE=1 SV=3	159	-27.55	159	-27.55	22	385	156	P	GO:0032201	telomere maintenance via semi-conservative replication
spu-miR-252a	comp10845_c0_seq2	RFC2_HUMAN	RFC2_HUMAN Replication factor C subunit 2 OS=Homo sapiens GN=RFC2 PE=1 SV=3	159	-27.55	159	-27.55	22	385	156	P	GO:0006200	ATP catabolic process
spu-miR-252a	comp10845_c0_seq2	RFC2_HUMAN	RFC2_HUMAN Replication factor C subunit 2 OS=Homo sapiens GN=RFC2 PE=1 SV=3	159	-27.55	159	-27.55	22	385	156	P	GO:0000003	reproduction
spu-miR-252a	comp10845_c0_seq2	RFC2_HUMAN	RFC2_HUMAN Replication factor C subunit 2 OS=Homo sapiens GN=RFC2 PE=1 SV=3	159	-27.55	159	-27.55	22	385	156	C	GO:0005654	nucleoplasm
spu-miR-252a	comp10845_c0_seq2	RFC2_HUMAN	RFC2_HUMAN Replication factor C subunit 2 OS=Homo sapiens GN=RFC2 PE=1 SV=3	159	-27.55	159	-27.55	22	385	156	P	GO:0000722	telomere maintenance via recombination
spu-miR-184	comp10845_c0_seq2	RFC2_HUMAN	RFC2_HUMAN Replication factor C subunit 2 OS=Homo sapiens GN=RFC2 PE=1 SV=3	143	-18.55	143	-18.55	22	385	267	F	GO:0005524	ATP binding
spu-miR-184	comp10845_c0_seq2	RFC2_HUMAN	RFC2_HUMAN Replication factor C subunit 2 OS=Homo sapiens GN=RFC2 PE=1 SV=3	143	-18.55	143	-18.55	22	385	267	C	GO:0005663	DNA replication factor C complex
spu-miR-184	comp10845_c0_seq2	RFC2_HUMAN	RFC2_HUMAN Replication factor C subunit 2 OS=Homo sapiens GN=RFC2 PE=1 SV=3	143	-18.55	143	-18.55	22	385	267	C	GO:0042575	DNA polymerase complex
spu-miR-184	comp10845_c0_seq2	RFC2_HUMAN	RFC2_HUMAN Replication factor C subunit 2 OS=Homo sapiens GN=RFC2 PE=1 SV=3	143	-18.55	143	-18.55	22	385	267	P	GO:0006271	DNA strand elongation involved in DNA replication
spu-miR-184	comp10845_c0_seq2	RFC2_HUMAN	RFC2_HUMAN Replication factor C subunit 2 OS=Homo sapiens GN=RFC2 PE=1 SV=3	143	-18.55	143	-18.55	22	385	267	P	GO:0000075	cell cycle checkpoint
spu-miR-184	comp10845_c0_seq2	RFC2_HUMAN	RFC2_HUMAN Replication factor C subunit 2 OS=Homo sapiens GN=RFC2 PE=1 SV=3	143	-18.55	143	-18.55	22	385	267	F	GO:0005515	protein binding
spu-miR-184	comp10845_c0_seq2	RFC2_HUMAN	RFC2_HUMAN Replication factor C subunit 2 OS=Homo sapiens GN=RFC2 PE=1 SV=3	143	-18.55	143	-18.55	22	385	267	P	GO:0006283	transcription-coupled nucleotide-excision repair
spu-miR-184	comp10845_c0_seq2	RFC2_HUMAN	RFC2_HUMAN Replication factor C subunit 2 OS=Homo sapiens GN=RFC2 PE=1 SV=3	143	-18.55	143	-18.55	22	385	267	P	GO:0040011	locomotion
spu-miR-184	comp10845_c0_seq2	RFC2_HUMAN	RFC2_HUMAN Replication factor C subunit 2 OS=Homo sapiens GN=RFC2 PE=1 SV=3	143	-18.55	143	-18.55	22	385	267	P	GO:0006297	nucleotide-excision repair, DNA gap filling
spu-miR-184	comp10845_c0_seq2	RFC2_HUMAN	RFC2_HUMAN Replication factor C subunit 2 OS=Homo sapiens GN=RFC2 PE=1 SV=3	143	-18.55	143	-18.55	22	385	267	P	GO:0009792	embryo development ending in birth or egg hatching
spu-miR-184	comp10845_c0_seq2	RFC2_HUMAN	RFC2_HUMAN Replication factor C subunit 2 OS=Homo sapiens GN=RFC2 PE=1 SV=3	143	-18.55	143	-18.55	22	385	267	F	GO:0003689	DNA clamp loader activity
spu-miR-184	comp10845_c0_seq2	RFC2_HUMAN	RFC2_HUMAN Replication factor C subunit 2 OS=Homo sapiens GN=RFC2 PE=1 SV=3	143	-18.55	143	-18.55	22	385	267	P	GO:0000084	S phase of mitotic cell cycle
spu-miR-184	comp10845_c0_seq2	RFC2_HUMAN	RFC2_HUMAN Replication factor C subunit 2 OS=Homo sapiens GN=RFC2 PE=1 SV=3	143	-18.55	143	-18.55	22	385	267	P	GO:0032201	telomere maintenance via semi-conservative replication
spu-miR-184	comp10845_c0_seq2	RFC2_HUMAN	RFC2_HUMAN Replication factor C subunit 2 OS=Homo sapiens GN=RFC2 PE=1 SV=3	143	-18.55	143	-18.55	22	385	267	P	GO:0006200	ATP catabolic process
spu-miR-184	comp10845_c0_seq2	RFC2_HUMAN	RFC2_HUMAN Replication factor C subunit 2 OS=Homo sapiens GN=RFC2 PE=1 SV=3	143	-18.55	143	-18.55	22	385	267	P	GO:0000003	reproduction
spu-miR-184	comp10845_c0_seq2	RFC2_HUMAN	RFC2_HUMAN Replication factor C subunit 2 OS=Homo sapiens GN=RFC2 PE=1 SV=3	143	-18.55	143	-18.55	22	385	267	C	GO:0005654	nucleoplasm
spu-miR-184	comp10845_c0_seq2	RFC2_HUMAN	RFC2_HUMAN Replication factor C subunit 2 OS=Homo sapiens GN=RFC2 PE=1 SV=3	143	-18.55	143	-18.55	22	385	267	P	GO:0000722	telomere maintenance via recombination
spu-miR-4847	comp10845_c0_seq2	RFC2_HUMAN	RFC2_HUMAN Replication factor C subunit 2 OS=Homo sapiens GN=RFC2 PE=1 SV=3	153	-18.87	153	-18.87	22	385	276	F	GO:0005524	ATP binding
spu-miR-4847	comp10845_c0_seq2	RFC2_HUMAN	RFC2_HUMAN Replication factor C subunit 2 OS=Homo sapiens GN=RFC2 PE=1 SV=3	153	-18.87	153	-18.87	22	385	276	C	GO:0005663	DNA replication factor C complex
spu-miR-4847	comp10845_c0_seq2	RFC2_HUMAN	RFC2_HUMAN Replication factor C subunit 2 OS=Homo sapiens GN=RFC2 PE=1 SV=3	153	-18.87	153	-18.87	22	385	276	C	GO:0042575	DNA polymerase complex
spu-miR-4847	comp10845_c0_seq2	RFC2_HUMAN	RFC2_HUMAN Replication factor C subunit 2 OS=Homo sapiens GN=RFC2 PE=1 SV=3	153	-18.87	153	-18.87	22	385	276	P	GO:0006271	DNA strand elongation involved in DNA replication
spu-miR-4847	comp10845_c0_seq2	RFC2_HUMAN	RFC2_HUMAN Replication factor C subunit 2 OS=Homo sapiens GN=RFC2 PE=1 SV=3	153	-18.87	153	-18.87	22	385	276	P	GO:0000075	cell cycle checkpoint
spu-miR-4847	comp10845_c0_seq2	RFC2_HUMAN	RFC2_HUMAN Replication factor C subunit 2 OS=Homo sapiens GN=RFC2 PE=1 SV=3	153	-18.87	153	-18.87	22	385	276	F	GO:0005515	protein binding
spu-miR-4847	comp10845_c0_seq2	RFC2_HUMAN	RFC2_HUMAN Replication factor C subunit 2 OS=Homo sapiens GN=RFC2 PE=1 SV=3	153	-18.87	153	-18.87	22	385	276	P	GO:0006283	transcription-coupled nucleotide-excision repair
spu-miR-4847	comp10845_c0_seq2	RFC2_HUMAN	RFC2_HUMAN Replication factor C subunit 2 OS=Homo sapiens GN=RFC2 PE=1 SV=3	153	-18.87	153	-18.87	22	385	276	P	GO:0040011	locomotion
spu-miR-4847	comp10845_c0_seq2	RFC2_HUMAN	RFC2_HUMAN Replication factor C subunit 2 OS=Homo sapiens GN=RFC2 PE=1 SV=3	153	-18.87	153	-18.87	22	385	276	P	GO:0006297	nucleotide-excision repair, DNA gap filling
spu-miR-4847	comp10845_c0_seq2	RFC2_HUMAN	RFC2_HUMAN Replication factor C subunit 2 OS=Homo sapiens GN=RFC2 PE=1 SV=3	153	-18.87	153	-18.87	22	385	276	P	GO:0009792	embryo development ending in birth or egg hatching
spu-miR-4847	comp10845_c0_seq2	RFC2_HUMAN	RFC2_HUMAN Replication factor C subunit 2 OS=Homo sapiens GN=RFC2 PE=1 SV=3	153	-18.87	153	-18.87	22	385	276	F	GO:0003689	DNA clamp loader activity
spu-miR-4847	comp10845_c0_seq2	RFC2_HUMAN	RFC2_HUMAN Replication factor C subunit 2 OS=Homo sapiens GN=RFC2 PE=1 SV=3	153	-18.87	153	-18.87	22	385	276	P	GO:0000084	S phase of mitotic cell cycle
spu-miR-4847	comp10845_c0_seq2	RFC2_HUMAN	RFC2_HUMAN Replication factor C subunit 2 OS=Homo sapiens GN=RFC2 PE=1 SV=3	153	-18.87	153	-18.87	22	385	276	P	GO:0032201	telomere maintenance via semi-conservative replication
spu-miR-4847	comp10845_c0_seq2	RFC2_HUMAN	RFC2_HUMAN Replication factor C subunit 2 OS=Homo sapiens GN=RFC2 PE=1 SV=3	153	-18.87	153	-18.87	22	385	276	P	GO:0006200	ATP catabolic process
spu-miR-4847	comp10845_c0_seq2	RFC2_HUMAN	RFC2_HUMAN Replication factor C subunit 2 OS=Homo sapiens GN=RFC2 PE=1 SV=3	153	-18.87	153	-18.87	22	385	276	P	GO:0000003	reproduction
spu-miR-4847	comp10845_c0_seq2	RFC2_HUMAN	RFC2_HUMAN Replication factor C subunit 2 OS=Homo sapiens GN=RFC2 PE=1 SV=3	153	-18.87	153	-18.87	22	385	276	C	GO:0005654	nucleoplasm
spu-miR-4847	comp10845_c0_seq2	RFC2_HUMAN	RFC2_HUMAN Replication factor C subunit 2 OS=Homo sapiens GN=RFC2 PE=1 SV=3	153	-18.87	153	-18.87	22	385	276	P	GO:0000722	telomere maintenance via recombination
spu-miR-4848a	comp10845_c0_seq2	RFC2_HUMAN	RFC2_HUMAN Replication factor C subunit 2 OS=Homo sapiens GN=RFC2 PE=1 SV=3	151	-19.83	151	-19.83	23	385	139	F	GO:0005524	ATP binding
spu-miR-4848a	comp10845_c0_seq2	RFC2_HUMAN	RFC2_HUMAN Replication factor C subunit 2 OS=Homo sapiens GN=RFC2 PE=1 SV=3	151	-19.83	151	-19.83	23	385	139	C	GO:0005663	DNA replication factor C complex
spu-miR-4848a	comp10845_c0_seq2	RFC2_HUMAN	RFC2_HUMAN Replication factor C subunit 2 OS=Homo sapiens GN=RFC2 PE=1 SV=3	151	-19.83	151	-19.83	23	385	139	C	GO:0042575	DNA polymerase complex
spu-miR-4848a	comp10845_c0_seq2	RFC2_HUMAN	RFC2_HUMAN Replication factor C subunit 2 OS=Homo sapiens GN=RFC2 PE=1 SV=3	151	-19.83	151	-19.83	23	385	139	P	GO:0006271	DNA strand elongation involved in DNA replication
spu-miR-4848a	comp10845_c0_seq2	RFC2_HUMAN	RFC2_HUMAN Replication factor C subunit 2 OS=Homo sapiens GN=RFC2 PE=1 SV=3	151	-19.83	151	-19.83	23	385	139	P	GO:0000075	cell cycle checkpoint
spu-miR-4848a	comp10845_c0_seq2	RFC2_HUMAN	RFC2_HUMAN Replication factor C subunit 2 OS=Homo sapiens GN=RFC2 PE=1 SV=3	151	-19.83	151	-19.83	23	385	139	F	GO:0005515	protein binding
spu-miR-4848a	comp10845_c0_seq2	RFC2_HUMAN	RFC2_HUMAN Replication factor C subunit 2 OS=Homo sapiens GN=RFC2 PE=1 SV=3	151	-19.83	151	-19.83	23	385	139	P	GO:0006283	transcription-coupled nucleotide-excision repair
spu-miR-4848a	comp10845_c0_seq2	RFC2_HUMAN	RFC2_HUMAN Replication factor C subunit 2 OS=Homo sapiens GN=RFC2 PE=1 SV=3	151	-19.83	151	-19.83	23	385	139	P	GO:0040011	locomotion
spu-miR-4848a	comp10845_c0_seq2	RFC2_HUMAN	RFC2_HUMAN Replication factor C subunit 2 OS=Homo sapiens GN=RFC2 PE=1 SV=3	151	-19.83	151	-19.83	23	385	139	P	GO:0006297	nucleotide-excision repair, DNA gap filling
spu-miR-4848a	comp10845_c0_seq2	RFC2_HUMAN	RFC2_HUMAN Replication factor C subunit 2 OS=Homo sapiens GN=RFC2 PE=1 SV=3	151	-19.83	151	-19.83	23	385	139	P	GO:0009792	embryo development ending in birth or egg hatching
spu-miR-4848a	comp10845_c0_seq2	RFC2_HUMAN	RFC2_HUMAN Replication factor C subunit 2 OS=Homo sapiens GN=RFC2 PE=1 SV=3	151	-19.83	151	-19.83	23	385	139	F	GO:0003689	DNA clamp loader activity
spu-miR-4848a	comp10845_c0_seq2	RFC2_HUMAN	RFC2_HUMAN Replication factor C subunit 2 OS=Homo sapiens GN=RFC2 PE=1 SV=3	151	-19.83	151	-19.83	23	385	139	P	GO:0000084	S phase of mitotic cell cycle
spu-miR-4848a	comp10845_c0_seq2	RFC2_HUMAN	RFC2_HUMAN Replication factor C subunit 2 OS=Homo sapiens GN=RFC2 PE=1 SV=3	151	-19.83	151	-19.83	23	385	139	P	GO:0032201	telomere maintenance via semi-conservative replication
spu-miR-4848a	comp10845_c0_seq2	RFC2_HUMAN	RFC2_HUMAN Replication factor C subunit 2 OS=Homo sapiens GN=RFC2 PE=1 SV=3	151	-19.83	151	-19.83	23	385	139	P	GO:0006200	ATP catabolic process
spu-miR-4848a	comp10845_c0_seq2	RFC2_HUMAN	RFC2_HUMAN Replication factor C subunit 2 OS=Homo sapiens GN=RFC2 PE=1 SV=3	151	-19.83	151	-19.83	23	385	139	P	GO:0000003	reproduction
spu-miR-4848a	comp10845_c0_seq2	RFC2_HUMAN	RFC2_HUMAN Replication factor C subunit 2 OS=Homo sapiens GN=RFC2 PE=1 SV=3	151	-19.83	151	-19.83	23	385	139	C	GO:0005654	nucleoplasm
spu-miR-4848a	comp10845_c0_seq2	RFC2_HUMAN	RFC2_HUMAN Replication factor C subunit 2 OS=Homo sapiens GN=RFC2 PE=1 SV=3	151	-19.83	151	-19.83	23	385	139	P	GO:0000722	telomere maintenance via recombination
spu-miR-4848b	comp10845_c0_seq2	RFC2_HUMAN	RFC2_HUMAN Replication factor C subunit 2 OS=Homo sapiens GN=RFC2 PE=1 SV=3	147	-20.49	147	-20.49	23	385	139	F	GO:0005524	ATP binding
spu-miR-4848b	comp10845_c0_seq2	RFC2_HUMAN	RFC2_HUMAN Replication factor C subunit 2 OS=Homo sapiens GN=RFC2 PE=1 SV=3	147	-20.49	147	-20.49	23	385	139	C	GO:0005663	DNA replication factor C complex
spu-miR-4848b	comp10845_c0_seq2	RFC2_HUMAN	RFC2_HUMAN Replication factor C subunit 2 OS=Homo sapiens GN=RFC2 PE=1 SV=3	147	-20.49	147	-20.49	23	385	139	C	GO:0042575	DNA polymerase complex
spu-miR-4848b	comp10845_c0_seq2	RFC2_HUMAN	RFC2_HUMAN Replication factor C subunit 2 OS=Homo sapiens GN=RFC2 PE=1 SV=3	147	-20.49	147	-20.49	23	385	139	P	GO:0006271	DNA strand elongation involved in DNA replication
spu-miR-4848b	comp10845_c0_seq2	RFC2_HUMAN	RFC2_HUMAN Replication factor C subunit 2 OS=Homo sapiens GN=RFC2 PE=1 SV=3	147	-20.49	147	-20.49	23	385	139	P	GO:0000075	cell cycle checkpoint
spu-miR-4848b	comp10845_c0_seq2	RFC2_HUMAN	RFC2_HUMAN Replication factor C subunit 2 OS=Homo sapiens GN=RFC2 PE=1 SV=3	147	-20.49	147	-20.49	23	385	139	F	GO:0005515	protein binding
spu-miR-4848b	comp10845_c0_seq2	RFC2_HUMAN	RFC2_HUMAN Replication factor C subunit 2 OS=Homo sapiens GN=RFC2 PE=1 SV=3	147	-20.49	147	-20.49	23	385	139	P	GO:0006283	transcription-coupled nucleotide-excision repair
spu-miR-4848b	comp10845_c0_seq2	RFC2_HUMAN	RFC2_HUMAN Replication factor C subunit 2 OS=Homo sapiens GN=RFC2 PE=1 SV=3	147	-20.49	147	-20.49	23	385	139	P	GO:0040011	locomotion
spu-miR-4848b	comp10845_c0_seq2	RFC2_HUMAN	RFC2_HUMAN Replication factor C subunit 2 OS=Homo sapiens GN=RFC2 PE=1 SV=3	147	-20.49	147	-20.49	23	385	139	P	GO:0006297	nucleotide-excision repair, DNA gap filling
spu-miR-4848b	comp10845_c0_seq2	RFC2_HUMAN	RFC2_HUMAN Replication factor C subunit 2 OS=Homo sapiens GN=RFC2 PE=1 SV=3	147	-20.49	147	-20.49	23	385	139	P	GO:0009792	embryo development ending in birth or egg hatching
spu-miR-4848b	comp10845_c0_seq2	RFC2_HUMAN	RFC2_HUMAN Replication factor C subunit 2 OS=Homo sapiens GN=RFC2 PE=1 SV=3	147	-20.49	147	-20.49	23	385	139	F	GO:0003689	DNA clamp loader activity
spu-miR-4848b	comp10845_c0_seq2	RFC2_HUMAN	RFC2_HUMAN Replication factor C subunit 2 OS=Homo sapiens GN=RFC2 PE=1 SV=3	147	-20.49	147	-20.49	23	385	139	P	GO:0000084	S phase of mitotic cell cycle
spu-miR-4848b	comp10845_c0_seq2	RFC2_HUMAN	RFC2_HUMAN Replication factor C subunit 2 OS=Homo sapiens GN=RFC2 PE=1 SV=3	147	-20.49	147	-20.49	23	385	139	P	GO:0032201	telomere maintenance via semi-conservative replication
spu-miR-4848b	comp10845_c0_seq2	RFC2_HUMAN	RFC2_HUMAN Replication factor C subunit 2 OS=Homo sapiens GN=RFC2 PE=1 SV=3	147	-20.49	147	-20.49	23	385	139	P	GO:0006200	ATP catabolic process
spu-miR-4848b	comp10845_c0_seq2	RFC2_HUMAN	RFC2_HUMAN Replication factor C subunit 2 OS=Homo sapiens GN=RFC2 PE=1 SV=3	147	-20.49	147	-20.49	23	385	139	P	GO:0000003	reproduction
spu-miR-4848b	comp10845_c0_seq2	RFC2_HUMAN	RFC2_HUMAN Replication factor C subunit 2 OS=Homo sapiens GN=RFC2 PE=1 SV=3	147	-20.49	147	-20.49	23	385	139	C	GO:0005654	nucleoplasm
spu-miR-4848b	comp10845_c0_seq2	RFC2_HUMAN	RFC2_HUMAN Replication factor C subunit 2 OS=Homo sapiens GN=RFC2 PE=1 SV=3	147	-20.49	147	-20.49	23	385	139	P	GO:0000722	telomere maintenance via recombination
spu-miR-34	comp108681_c0_seq1	UBC4_SCHPO	UBC4_SCHPO Ubiquitin-conjugating enzyme E2 4 OS=Schizosaccharomyces pombe (strain 972 / ATCC 24843) GN=ubc4 PE=2 SV=1	146	-17.15	146	-17.15	22	336	284	P	GO:0008340	determination of adult lifespan
spu-miR-34	comp108681_c0_seq1	UBC4_SCHPO	UBC4_SCHPO Ubiquitin-conjugating enzyme E2 4 OS=Schizosaccharomyces pombe (strain 972 / ATCC 24843) GN=ubc4 PE=2 SV=1	146	-17.15	146	-17.15	22	336	284	F	GO:0031625	ubiquitin protein ligase binding
spu-miR-34	comp108681_c0_seq1	UBC4_SCHPO	UBC4_SCHPO Ubiquitin-conjugating enzyme E2 4 OS=Schizosaccharomyces pombe (strain 972 / ATCC 24843) GN=ubc4 PE=2 SV=1	146	-17.15	146	-17.15	22	336	284	P	GO:0070979	protein K11-linked ubiquitination
spu-miR-34	comp108681_c0_seq1	UBC4_SCHPO	UBC4_SCHPO Ubiquitin-conjugating enzyme E2 4 OS=Schizosaccharomyces pombe (strain 972 / ATCC 24843) GN=ubc4 PE=2 SV=1	146	-17.15	146	-17.15	22	336	284	P	GO:0040007	growth
spu-miR-34	comp108681_c0_seq1	UBC4_SCHPO	UBC4_SCHPO Ubiquitin-conjugating enzyme E2 4 OS=Schizosaccharomyces pombe (strain 972 / ATCC 24843) GN=ubc4 PE=2 SV=1	146	-17.15	146	-17.15	22	336	284	P	GO:0007126	meiosis
spu-miR-34	comp108681_c0_seq1	UBC4_SCHPO	UBC4_SCHPO Ubiquitin-conjugating enzyme E2 4 OS=Schizosaccharomyces pombe (strain 972 / ATCC 24843) GN=ubc4 PE=2 SV=1	146	-17.15	146	-17.15	22	336	284	P	GO:0043161	proteasomal ubiquitin-dependent protein catabolic process
spu-miR-34	comp108681_c0_seq1	UBC4_SCHPO	UBC4_SCHPO Ubiquitin-conjugating enzyme E2 4 OS=Schizosaccharomyces pombe (strain 972 / ATCC 24843) GN=ubc4 PE=2 SV=1	146	-17.15	146	-17.15	22	336	284	C	GO:0016020	membrane
spu-miR-34	comp108681_c0_seq1	UBC4_SCHPO	UBC4_SCHPO Ubiquitin-conjugating enzyme E2 4 OS=Schizosaccharomyces pombe (strain 972 / ATCC 24843) GN=ubc4 PE=2 SV=1	146	-17.15	146	-17.15	22	336	284	P	GO:0070936	protein K48-linked ubiquitination
spu-miR-34	comp108681_c0_seq1	UBC4_SCHPO	UBC4_SCHPO Ubiquitin-conjugating enzyme E2 4 OS=Schizosaccharomyces pombe (strain 972 / ATCC 24843) GN=ubc4 PE=2 SV=1	146	-17.15	146	-17.15	22	336	284	P	GO:0006513	protein monoubiquitination
spu-miR-34	comp108681_c0_seq1	UBC4_SCHPO	UBC4_SCHPO Ubiquitin-conjugating enzyme E2 4 OS=Schizosaccharomyces pombe (strain 972 / ATCC 24843) GN=ubc4 PE=2 SV=1	146	-17.15	146	-17.15	22	336	284	C	GO:0005768	endosome
spu-miR-34	comp108681_c0_seq1	UBC4_SCHPO	UBC4_SCHPO Ubiquitin-conjugating enzyme E2 4 OS=Schizosaccharomyces pombe (strain 972 / ATCC 24843) GN=ubc4 PE=2 SV=1	146	-17.15	146	-17.15	22	336	284	F	GO:0004842	ubiquitin-protein ligase activity
spu-miR-34	comp108681_c0_seq1	UBC4_SCHPO	UBC4_SCHPO Ubiquitin-conjugating enzyme E2 4 OS=Schizosaccharomyces pombe (strain 972 / ATCC 24843) GN=ubc4 PE=2 SV=1	146	-17.15	146	-17.15	22	336	284	P	GO:0042787	protein ubiquitination involved in ubiquitin-dependent protein catabolic process
spu-miR-34	comp108681_c0_seq1	UBC4_SCHPO	UBC4_SCHPO Ubiquitin-conjugating enzyme E2 4 OS=Schizosaccharomyces pombe (strain 972 / ATCC 24843) GN=ubc4 PE=2 SV=1	146	-17.15	146	-17.15	22	336	284	P	GO:0002119	nematode larval development
spu-miR-34	comp108681_c0_seq1	UBC4_SCHPO	UBC4_SCHPO Ubiquitin-conjugating enzyme E2 4 OS=Schizosaccharomyces pombe (strain 972 / ATCC 24843) GN=ubc4 PE=2 SV=1	146	-17.15	146	-17.15	22	336	284	F	GO:0000166	nucleotide binding
spu-miR-34	comp108681_c0_seq1	UBC4_SCHPO	UBC4_SCHPO Ubiquitin-conjugating enzyme E2 4 OS=Schizosaccharomyces pombe (strain 972 / ATCC 24843) GN=ubc4 PE=2 SV=1	146	-17.15	146	-17.15	22	336	284	P	GO:0040011	locomotion
spu-miR-34	comp108681_c0_seq1	UBC4_SCHPO	UBC4_SCHPO Ubiquitin-conjugating enzyme E2 4 OS=Schizosaccharomyces pombe (strain 972 / ATCC 24843) GN=ubc4 PE=2 SV=1	146	-17.15	146	-17.15	22	336	284	P	GO:0040035	hermaphrodite genitalia development
spu-miR-34	comp108681_c0_seq1	UBC4_SCHPO	UBC4_SCHPO Ubiquitin-conjugating enzyme E2 4 OS=Schizosaccharomyces pombe (strain 972 / ATCC 24843) GN=ubc4 PE=2 SV=1	146	-17.15	146	-17.15	22	336	284	P	GO:0007281	germ cell development
spu-miR-34	comp108681_c0_seq1	UBC4_SCHPO	UBC4_SCHPO Ubiquitin-conjugating enzyme E2 4 OS=Schizosaccharomyces pombe (strain 972 / ATCC 24843) GN=ubc4 PE=2 SV=1	146	-17.15	146	-17.15	22	336	284	P	GO:0009792	embryo development ending in birth or egg hatching
spu-miR-2006	comp11015_c0_seq25	Q6DRN0_DANRE	Q6DRN0_DANRE DEAD box polypeptide 27 OS=Danio rerio GN=ddx27 PE=2 SV=1	140	-18.71	140	-18.71	22	225	130	F	GO:0005102	receptor binding
spu-miR-2006	comp11015_c0_seq25	Q6DRN0_DANRE	Q6DRN0_DANRE DEAD box polypeptide 27 OS=Danio rerio GN=ddx27 PE=2 SV=1	140	-18.71	140	-18.71	22	225	130	C	GO:0005634	nucleus
spu-miR-2006	comp11015_c0_seq25	Q6DRN0_DANRE	Q6DRN0_DANRE DEAD box polypeptide 27 OS=Danio rerio GN=ddx27 PE=2 SV=1	140	-18.71	140	-18.71	22	225	130	P	GO:0010467	gene expression
spu-miR-2006	comp11015_c0_seq25	Q6DRN0_DANRE	Q6DRN0_DANRE DEAD box polypeptide 27 OS=Danio rerio GN=ddx27 PE=2 SV=1	140	-18.71	140	-18.71	22	225	130	P	GO:0002119	nematode larval development
spu-miR-2006	comp11015_c0_seq25	Q6DRN0_DANRE	Q6DRN0_DANRE DEAD box polypeptide 27 OS=Danio rerio GN=ddx27 PE=2 SV=1	140	-18.71	140	-18.71	22	225	130	P	GO:0016070	RNA metabolic process
spu-miR-2006	comp11015_c0_seq25	Q6DRN0_DANRE	Q6DRN0_DANRE DEAD box polypeptide 27 OS=Danio rerio GN=ddx27 PE=2 SV=1	140	-18.71	140	-18.71	22	225	130	P	GO:0040010	positive regulation of growth rate
spu-miR-2006	comp11015_c0_seq25	Q6DRN0_DANRE	Q6DRN0_DANRE DEAD box polypeptide 27 OS=Danio rerio GN=ddx27 PE=2 SV=1	140	-18.71	140	-18.71	22	225	130	F	GO:0008026	ATP-dependent helicase activity
spu-miR-2006	comp11015_c0_seq25	Q6DRN0_DANRE	Q6DRN0_DANRE DEAD box polypeptide 27 OS=Danio rerio GN=ddx27 PE=2 SV=1	140	-18.71	140	-18.71	22	225	130	P	GO:0007165	signal transduction
spu-miR-2012	comp11015_c0_seq25	Q6DRN0_DANRE	Q6DRN0_DANRE DEAD box polypeptide 27 OS=Danio rerio GN=ddx27 PE=2 SV=1	160	-20.02	160	-20.02	22	225	179	F	GO:0005102	receptor binding
spu-miR-2012	comp11015_c0_seq25	Q6DRN0_DANRE	Q6DRN0_DANRE DEAD box polypeptide 27 OS=Danio rerio GN=ddx27 PE=2 SV=1	160	-20.02	160	-20.02	22	225	179	C	GO:0005634	nucleus
spu-miR-2012	comp11015_c0_seq25	Q6DRN0_DANRE	Q6DRN0_DANRE DEAD box polypeptide 27 OS=Danio rerio GN=ddx27 PE=2 SV=1	160	-20.02	160	-20.02	22	225	179	P	GO:0010467	gene expression
spu-miR-2012	comp11015_c0_seq25	Q6DRN0_DANRE	Q6DRN0_DANRE DEAD box polypeptide 27 OS=Danio rerio GN=ddx27 PE=2 SV=1	160	-20.02	160	-20.02	22	225	179	P	GO:0002119	nematode larval development
spu-miR-2012	comp11015_c0_seq25	Q6DRN0_DANRE	Q6DRN0_DANRE DEAD box polypeptide 27 OS=Danio rerio GN=ddx27 PE=2 SV=1	160	-20.02	160	-20.02	22	225	179	P	GO:0016070	RNA metabolic process
spu-miR-2012	comp11015_c0_seq25	Q6DRN0_DANRE	Q6DRN0_DANRE DEAD box polypeptide 27 OS=Danio rerio GN=ddx27 PE=2 SV=1	160	-20.02	160	-20.02	22	225	179	P	GO:0040010	positive regulation of growth rate
spu-miR-2012	comp11015_c0_seq25	Q6DRN0_DANRE	Q6DRN0_DANRE DEAD box polypeptide 27 OS=Danio rerio GN=ddx27 PE=2 SV=1	160	-20.02	160	-20.02	22	225	179	F	GO:0008026	ATP-dependent helicase activity
spu-miR-2012	comp11015_c0_seq25	Q6DRN0_DANRE	Q6DRN0_DANRE DEAD box polypeptide 27 OS=Danio rerio GN=ddx27 PE=2 SV=1	160	-20.02	160	-20.02	22	225	179	P	GO:0007165	signal transduction
spu-miR-2004	comp11015_c0_seq25	Q6DRN0_DANRE	Q6DRN0_DANRE DEAD box polypeptide 27 OS=Danio rerio GN=ddx27 PE=2 SV=1	147	-17.1	147	-17.1	22	225	128	F	GO:0005102	receptor binding
spu-miR-2004	comp11015_c0_seq25	Q6DRN0_DANRE	Q6DRN0_DANRE DEAD box polypeptide 27 OS=Danio rerio GN=ddx27 PE=2 SV=1	147	-17.1	147	-17.1	22	225	128	C	GO:0005634	nucleus
spu-miR-2004	comp11015_c0_seq25	Q6DRN0_DANRE	Q6DRN0_DANRE DEAD box polypeptide 27 OS=Danio rerio GN=ddx27 PE=2 SV=1	147	-17.1	147	-17.1	22	225	128	P	GO:0010467	gene expression
spu-miR-2004	comp11015_c0_seq25	Q6DRN0_DANRE	Q6DRN0_DANRE DEAD box polypeptide 27 OS=Danio rerio GN=ddx27 PE=2 SV=1	147	-17.1	147	-17.1	22	225	128	P	GO:0002119	nematode larval development
spu-miR-2004	comp11015_c0_seq25	Q6DRN0_DANRE	Q6DRN0_DANRE DEAD box polypeptide 27 OS=Danio rerio GN=ddx27 PE=2 SV=1	147	-17.1	147	-17.1	22	225	128	P	GO:0016070	RNA metabolic process
spu-miR-2004	comp11015_c0_seq25	Q6DRN0_DANRE	Q6DRN0_DANRE DEAD box polypeptide 27 OS=Danio rerio GN=ddx27 PE=2 SV=1	147	-17.1	147	-17.1	22	225	128	P	GO:0040010	positive regulation of growth rate
spu-miR-2004	comp11015_c0_seq25	Q6DRN0_DANRE	Q6DRN0_DANRE DEAD box polypeptide 27 OS=Danio rerio GN=ddx27 PE=2 SV=1	147	-17.1	147	-17.1	22	225	128	F	GO:0008026	ATP-dependent helicase activity
spu-miR-2004	comp11015_c0_seq25	Q6DRN0_DANRE	Q6DRN0_DANRE DEAD box polypeptide 27 OS=Danio rerio GN=ddx27 PE=2 SV=1	147	-17.1	147	-17.1	22	225	128	P	GO:0007165	signal transduction
spu-miR-4854	comp11015_c0_seq25	Q6DRN0_DANRE	Q6DRN0_DANRE DEAD box polypeptide 27 OS=Danio rerio GN=ddx27 PE=2 SV=1	154	-22.6	154	-22.6	22	225	142	F	GO:0005102	receptor binding
spu-miR-4854	comp11015_c0_seq25	Q6DRN0_DANRE	Q6DRN0_DANRE DEAD box polypeptide 27 OS=Danio rerio GN=ddx27 PE=2 SV=1	154	-22.6	154	-22.6	22	225	142	C	GO:0005634	nucleus
spu-miR-4854	comp11015_c0_seq25	Q6DRN0_DANRE	Q6DRN0_DANRE DEAD box polypeptide 27 OS=Danio rerio GN=ddx27 PE=2 SV=1	154	-22.6	154	-22.6	22	225	142	P	GO:0010467	gene expression
spu-miR-4854	comp11015_c0_seq25	Q6DRN0_DANRE	Q6DRN0_DANRE DEAD box polypeptide 27 OS=Danio rerio GN=ddx27 PE=2 SV=1	154	-22.6	154	-22.6	22	225	142	P	GO:0002119	nematode larval development
spu-miR-4854	comp11015_c0_seq25	Q6DRN0_DANRE	Q6DRN0_DANRE DEAD box polypeptide 27 OS=Danio rerio GN=ddx27 PE=2 SV=1	154	-22.6	154	-22.6	22	225	142	P	GO:0016070	RNA metabolic process
spu-miR-4854	comp11015_c0_seq25	Q6DRN0_DANRE	Q6DRN0_DANRE DEAD box polypeptide 27 OS=Danio rerio GN=ddx27 PE=2 SV=1	154	-22.6	154	-22.6	22	225	142	P	GO:0040010	positive regulation of growth rate
spu-miR-4854	comp11015_c0_seq25	Q6DRN0_DANRE	Q6DRN0_DANRE DEAD box polypeptide 27 OS=Danio rerio GN=ddx27 PE=2 SV=1	154	-22.6	154	-22.6	22	225	142	F	GO:0008026	ATP-dependent helicase activity
spu-miR-4854	comp11015_c0_seq25	Q6DRN0_DANRE	Q6DRN0_DANRE DEAD box polypeptide 27 OS=Danio rerio GN=ddx27 PE=2 SV=1	154	-22.6	154	-22.6	22	225	142	P	GO:0007165	signal transduction
spu-miR-4850	comp11053_c0_seq2	B8JLX8_DANRE	B8JLX8_DANRE Novel protein (Zgc:195170) OS=Danio rerio GN=CH73-137B21.3 PE=4 SV=1	144	-18.64	144	-18.64	23	1244	488	C	GO:0044425	membrane part
spu-miR-4850	comp11053_c0_seq2	B8JLX8_DANRE	B8JLX8_DANRE Novel protein (Zgc:195170) OS=Danio rerio GN=CH73-137B21.3 PE=4 SV=1	144	-18.64	144	-18.64	23	1244	488	P	GO:0006873	cellular ion homeostasis
spu-miR-4850	comp11053_c0_seq2	B8JLX8_DANRE	B8JLX8_DANRE Novel protein (Zgc:195170) OS=Danio rerio GN=CH73-137B21.3 PE=4 SV=1	144	-18.64	144	-18.64	23	1244	488	P	GO:0019222	regulation of metabolic process
spu-miR-4850	comp11053_c0_seq2	B8JLX8_DANRE	B8JLX8_DANRE Novel protein (Zgc:195170) OS=Danio rerio GN=CH73-137B21.3 PE=4 SV=1	144	-18.64	144	-18.64	23	1244	488	P	GO:0006950	response to stress
spu-miR-4850	comp11053_c0_seq2	B8JLX8_DANRE	B8JLX8_DANRE Novel protein (Zgc:195170) OS=Danio rerio GN=CH73-137B21.3 PE=4 SV=1	144	-18.64	144	-18.64	23	1244	488	P	GO:0010033	response to organic substance
spu-miR-4850	comp11053_c0_seq2	B8JLX8_DANRE	B8JLX8_DANRE Novel protein (Zgc:195170) OS=Danio rerio GN=CH73-137B21.3 PE=4 SV=1	144	-18.64	144	-18.64	23	1244	488	P	GO:0002376	immune system process
spu-miR-4850	comp11053_c0_seq2	B8JLX8_DANRE	B8JLX8_DANRE Novel protein (Zgc:195170) OS=Danio rerio GN=CH73-137B21.3 PE=4 SV=1	144	-18.64	144	-18.64	23	1244	488	P	GO:0022607	cellular component assembly
spu-miR-4850	comp11053_c0_seq2	B8JLX8_DANRE	B8JLX8_DANRE Novel protein (Zgc:195170) OS=Danio rerio GN=CH73-137B21.3 PE=4 SV=1	144	-18.64	144	-18.64	23	1244	488	P	GO:0001819	positive regulation of cytokine production
spu-miR-4850	comp11053_c0_seq2	B8JLX8_DANRE	B8JLX8_DANRE Novel protein (Zgc:195170) OS=Danio rerio GN=CH73-137B21.3 PE=4 SV=1	144	-18.64	144	-18.64	23	1244	488	P	GO:0050714	positive regulation of protein secretion
spu-miR-4850	comp11053_c0_seq2	B8JLX8_DANRE	B8JLX8_DANRE Novel protein (Zgc:195170) OS=Danio rerio GN=CH73-137B21.3 PE=4 SV=1	144	-18.64	144	-18.64	23	1244	488	P	GO:0006468	protein phosphorylation
spu-miR-4850	comp11053_c0_seq2	B8JLX8_DANRE	B8JLX8_DANRE Novel protein (Zgc:195170) OS=Danio rerio GN=CH73-137B21.3 PE=4 SV=1	144	-18.64	144	-18.64	23	1244	488	P	GO:0007165	signal transduction
spu-miR-4850	comp11053_c0_seq2	B8JLX8_DANRE	B8JLX8_DANRE Novel protein (Zgc:195170) OS=Danio rerio GN=CH73-137B21.3 PE=4 SV=1	144	-18.64	144	-18.64	23	1244	488	P	GO:0048583	regulation of response to stimulus
spu-miR-4850	comp11053_c0_seq2	B8JLX8_DANRE	B8JLX8_DANRE Novel protein (Zgc:195170) OS=Danio rerio GN=CH73-137B21.3 PE=4 SV=1	144	-18.64	144	-18.64	23	1244	488	P	GO:0030001	metal ion transport
spu-miR-4850	comp11053_c0_seq2	B8JLX8_DANRE	B8JLX8_DANRE Novel protein (Zgc:195170) OS=Danio rerio GN=CH73-137B21.3 PE=4 SV=1	144	-18.64	144	-18.64	23	1244	488	F	GO:0005488	binding
spu-miR-4850	comp11053_c0_seq2	B8JLX8_DANRE	B8JLX8_DANRE Novel protein (Zgc:195170) OS=Danio rerio GN=CH73-137B21.3 PE=4 SV=1	144	-18.64	144	-18.64	23	1244	488	P	GO:0006996	organelle organization
spu-miR-4850	comp11053_c0_seq2	B8JLX8_DANRE	B8JLX8_DANRE Novel protein (Zgc:195170) OS=Danio rerio GN=CH73-137B21.3 PE=4 SV=1	144	-18.64	144	-18.64	23	1244	488	P	GO:0010941	regulation of cell death
spu-miR-4852	comp11053_c0_seq2	B8JLX8_DANRE	B8JLX8_DANRE Novel protein (Zgc:195170) OS=Danio rerio GN=CH73-137B21.3 PE=4 SV=1	290	-30.7	148	-17.08	22	1244	496 206	C	GO:0044425	membrane part
spu-miR-4852	comp11053_c0_seq2	B8JLX8_DANRE	B8JLX8_DANRE Novel protein (Zgc:195170) OS=Danio rerio GN=CH73-137B21.3 PE=4 SV=1	290	-30.7	148	-17.08	22	1244	496 206	P	GO:0006873	cellular ion homeostasis
spu-miR-4852	comp11053_c0_seq2	B8JLX8_DANRE	B8JLX8_DANRE Novel protein (Zgc:195170) OS=Danio rerio GN=CH73-137B21.3 PE=4 SV=1	290	-30.7	148	-17.08	22	1244	496 206	P	GO:0019222	regulation of metabolic process
spu-miR-4852	comp11053_c0_seq2	B8JLX8_DANRE	B8JLX8_DANRE Novel protein (Zgc:195170) OS=Danio rerio GN=CH73-137B21.3 PE=4 SV=1	290	-30.7	148	-17.08	22	1244	496 206	P	GO:0006950	response to stress
spu-miR-4852	comp11053_c0_seq2	B8JLX8_DANRE	B8JLX8_DANRE Novel protein (Zgc:195170) OS=Danio rerio GN=CH73-137B21.3 PE=4 SV=1	290	-30.7	148	-17.08	22	1244	496 206	P	GO:0010033	response to organic substance
spu-miR-4852	comp11053_c0_seq2	B8JLX8_DANRE	B8JLX8_DANRE Novel protein (Zgc:195170) OS=Danio rerio GN=CH73-137B21.3 PE=4 SV=1	290	-30.7	148	-17.08	22	1244	496 206	P	GO:0002376	immune system process
spu-miR-4852	comp11053_c0_seq2	B8JLX8_DANRE	B8JLX8_DANRE Novel protein (Zgc:195170) OS=Danio rerio GN=CH73-137B21.3 PE=4 SV=1	290	-30.7	148	-17.08	22	1244	496 206	P	GO:0022607	cellular component assembly
spu-miR-4852	comp11053_c0_seq2	B8JLX8_DANRE	B8JLX8_DANRE Novel protein (Zgc:195170) OS=Danio rerio GN=CH73-137B21.3 PE=4 SV=1	290	-30.7	148	-17.08	22	1244	496 206	P	GO:0001819	positive regulation of cytokine production
spu-miR-4852	comp11053_c0_seq2	B8JLX8_DANRE	B8JLX8_DANRE Novel protein (Zgc:195170) OS=Danio rerio GN=CH73-137B21.3 PE=4 SV=1	290	-30.7	148	-17.08	22	1244	496 206	P	GO:0050714	positive regulation of protein secretion
spu-miR-4852	comp11053_c0_seq2	B8JLX8_DANRE	B8JLX8_DANRE Novel protein (Zgc:195170) OS=Danio rerio GN=CH73-137B21.3 PE=4 SV=1	290	-30.7	148	-17.08	22	1244	496 206	P	GO:0006468	protein phosphorylation
spu-miR-4852	comp11053_c0_seq2	B8JLX8_DANRE	B8JLX8_DANRE Novel protein (Zgc:195170) OS=Danio rerio GN=CH73-137B21.3 PE=4 SV=1	290	-30.7	148	-17.08	22	1244	496 206	P	GO:0007165	signal transduction
spu-miR-4852	comp11053_c0_seq2	B8JLX8_DANRE	B8JLX8_DANRE Novel protein (Zgc:195170) OS=Danio rerio GN=CH73-137B21.3 PE=4 SV=1	290	-30.7	148	-17.08	22	1244	496 206	P	GO:0048583	regulation of response to stimulus
spu-miR-4852	comp11053_c0_seq2	B8JLX8_DANRE	B8JLX8_DANRE Novel protein (Zgc:195170) OS=Danio rerio GN=CH73-137B21.3 PE=4 SV=1	290	-30.7	148	-17.08	22	1244	496 206	P	GO:0030001	metal ion transport
spu-miR-4852	comp11053_c0_seq2	B8JLX8_DANRE	B8JLX8_DANRE Novel protein (Zgc:195170) OS=Danio rerio GN=CH73-137B21.3 PE=4 SV=1	290	-30.7	148	-17.08	22	1244	496 206	F	GO:0005488	binding
spu-miR-4852	comp11053_c0_seq2	B8JLX8_DANRE	B8JLX8_DANRE Novel protein (Zgc:195170) OS=Danio rerio GN=CH73-137B21.3 PE=4 SV=1	290	-30.7	148	-17.08	22	1244	496 206	P	GO:0006996	organelle organization
spu-miR-4852	comp11053_c0_seq2	B8JLX8_DANRE	B8JLX8_DANRE Novel protein (Zgc:195170) OS=Danio rerio GN=CH73-137B21.3 PE=4 SV=1	290	-30.7	148	-17.08	22	1244	496 206	P	GO:0010941	regulation of cell death
spu-miR-4848a	comp11053_c0_seq2	B8JLX8_DANRE	B8JLX8_DANRE Novel protein (Zgc:195170) OS=Danio rerio GN=CH73-137B21.3 PE=4 SV=1	155	-21.17	155	-21.17	23	1244	745	C	GO:0044425	membrane part
spu-miR-4848a	comp11053_c0_seq2	B8JLX8_DANRE	B8JLX8_DANRE Novel protein (Zgc:195170) OS=Danio rerio GN=CH73-137B21.3 PE=4 SV=1	155	-21.17	155	-21.17	23	1244	745	P	GO:0006873	cellular ion homeostasis
spu-miR-4848a	comp11053_c0_seq2	B8JLX8_DANRE	B8JLX8_DANRE Novel protein (Zgc:195170) OS=Danio rerio GN=CH73-137B21.3 PE=4 SV=1	155	-21.17	155	-21.17	23	1244	745	P	GO:0019222	regulation of metabolic process
spu-miR-4848a	comp11053_c0_seq2	B8JLX8_DANRE	B8JLX8_DANRE Novel protein (Zgc:195170) OS=Danio rerio GN=CH73-137B21.3 PE=4 SV=1	155	-21.17	155	-21.17	23	1244	745	P	GO:0006950	response to stress
spu-miR-4848a	comp11053_c0_seq2	B8JLX8_DANRE	B8JLX8_DANRE Novel protein (Zgc:195170) OS=Danio rerio GN=CH73-137B21.3 PE=4 SV=1	155	-21.17	155	-21.17	23	1244	745	P	GO:0010033	response to organic substance
spu-miR-4848a	comp11053_c0_seq2	B8JLX8_DANRE	B8JLX8_DANRE Novel protein (Zgc:195170) OS=Danio rerio GN=CH73-137B21.3 PE=4 SV=1	155	-21.17	155	-21.17	23	1244	745	P	GO:0002376	immune system process
spu-miR-4848a	comp11053_c0_seq2	B8JLX8_DANRE	B8JLX8_DANRE Novel protein (Zgc:195170) OS=Danio rerio GN=CH73-137B21.3 PE=4 SV=1	155	-21.17	155	-21.17	23	1244	745	P	GO:0022607	cellular component assembly
spu-miR-4848a	comp11053_c0_seq2	B8JLX8_DANRE	B8JLX8_DANRE Novel protein (Zgc:195170) OS=Danio rerio GN=CH73-137B21.3 PE=4 SV=1	155	-21.17	155	-21.17	23	1244	745	P	GO:0001819	positive regulation of cytokine production
spu-miR-4848a	comp11053_c0_seq2	B8JLX8_DANRE	B8JLX8_DANRE Novel protein (Zgc:195170) OS=Danio rerio GN=CH73-137B21.3 PE=4 SV=1	155	-21.17	155	-21.17	23	1244	745	P	GO:0050714	positive regulation of protein secretion
spu-miR-4848a	comp11053_c0_seq2	B8JLX8_DANRE	B8JLX8_DANRE Novel protein (Zgc:195170) OS=Danio rerio GN=CH73-137B21.3 PE=4 SV=1	155	-21.17	155	-21.17	23	1244	745	P	GO:0006468	protein phosphorylation
spu-miR-4848a	comp11053_c0_seq2	B8JLX8_DANRE	B8JLX8_DANRE Novel protein (Zgc:195170) OS=Danio rerio GN=CH73-137B21.3 PE=4 SV=1	155	-21.17	155	-21.17	23	1244	745	P	GO:0007165	signal transduction
spu-miR-4848a	comp11053_c0_seq2	B8JLX8_DANRE	B8JLX8_DANRE Novel protein (Zgc:195170) OS=Danio rerio GN=CH73-137B21.3 PE=4 SV=1	155	-21.17	155	-21.17	23	1244	745	P	GO:0048583	regulation of response to stimulus
spu-miR-4848a	comp11053_c0_seq2	B8JLX8_DANRE	B8JLX8_DANRE Novel protein (Zgc:195170) OS=Danio rerio GN=CH73-137B21.3 PE=4 SV=1	155	-21.17	155	-21.17	23	1244	745	P	GO:0030001	metal ion transport
spu-miR-4848a	comp11053_c0_seq2	B8JLX8_DANRE	B8JLX8_DANRE Novel protein (Zgc:195170) OS=Danio rerio GN=CH73-137B21.3 PE=4 SV=1	155	-21.17	155	-21.17	23	1244	745	F	GO:0005488	binding
spu-miR-4848a	comp11053_c0_seq2	B8JLX8_DANRE	B8JLX8_DANRE Novel protein (Zgc:195170) OS=Danio rerio GN=CH73-137B21.3 PE=4 SV=1	155	-21.17	155	-21.17	23	1244	745	P	GO:0006996	organelle organization
spu-miR-4848a	comp11053_c0_seq2	B8JLX8_DANRE	B8JLX8_DANRE Novel protein (Zgc:195170) OS=Danio rerio GN=CH73-137B21.3 PE=4 SV=1	155	-21.17	155	-21.17	23	1244	745	P	GO:0010941	regulation of cell death
spu-miR-4848b	comp11053_c0_seq2	B8JLX8_DANRE	B8JLX8_DANRE Novel protein (Zgc:195170) OS=Danio rerio GN=CH73-137B21.3 PE=4 SV=1	156	-22.44	156	-22.44	23	1244	745	C	GO:0044425	membrane part
spu-miR-4848b	comp11053_c0_seq2	B8JLX8_DANRE	B8JLX8_DANRE Novel protein (Zgc:195170) OS=Danio rerio GN=CH73-137B21.3 PE=4 SV=1	156	-22.44	156	-22.44	23	1244	745	P	GO:0006873	cellular ion homeostasis
spu-miR-4848b	comp11053_c0_seq2	B8JLX8_DANRE	B8JLX8_DANRE Novel protein (Zgc:195170) OS=Danio rerio GN=CH73-137B21.3 PE=4 SV=1	156	-22.44	156	-22.44	23	1244	745	P	GO:0019222	regulation of metabolic process
spu-miR-4848b	comp11053_c0_seq2	B8JLX8_DANRE	B8JLX8_DANRE Novel protein (Zgc:195170) OS=Danio rerio GN=CH73-137B21.3 PE=4 SV=1	156	-22.44	156	-22.44	23	1244	745	P	GO:0006950	response to stress
spu-miR-4848b	comp11053_c0_seq2	B8JLX8_DANRE	B8JLX8_DANRE Novel protein (Zgc:195170) OS=Danio rerio GN=CH73-137B21.3 PE=4 SV=1	156	-22.44	156	-22.44	23	1244	745	P	GO:0010033	response to organic substance
spu-miR-4848b	comp11053_c0_seq2	B8JLX8_DANRE	B8JLX8_DANRE Novel protein (Zgc:195170) OS=Danio rerio GN=CH73-137B21.3 PE=4 SV=1	156	-22.44	156	-22.44	23	1244	745	P	GO:0002376	immune system process
spu-miR-4848b	comp11053_c0_seq2	B8JLX8_DANRE	B8JLX8_DANRE Novel protein (Zgc:195170) OS=Danio rerio GN=CH73-137B21.3 PE=4 SV=1	156	-22.44	156	-22.44	23	1244	745	P	GO:0022607	cellular component assembly
spu-miR-4848b	comp11053_c0_seq2	B8JLX8_DANRE	B8JLX8_DANRE Novel protein (Zgc:195170) OS=Danio rerio GN=CH73-137B21.3 PE=4 SV=1	156	-22.44	156	-22.44	23	1244	745	P	GO:0001819	positive regulation of cytokine production
spu-miR-4848b	comp11053_c0_seq2	B8JLX8_DANRE	B8JLX8_DANRE Novel protein (Zgc:195170) OS=Danio rerio GN=CH73-137B21.3 PE=4 SV=1	156	-22.44	156	-22.44	23	1244	745	P	GO:0050714	positive regulation of protein secretion
spu-miR-4848b	comp11053_c0_seq2	B8JLX8_DANRE	B8JLX8_DANRE Novel protein (Zgc:195170) OS=Danio rerio GN=CH73-137B21.3 PE=4 SV=1	156	-22.44	156	-22.44	23	1244	745	P	GO:0006468	protein phosphorylation
spu-miR-4848b	comp11053_c0_seq2	B8JLX8_DANRE	B8JLX8_DANRE Novel protein (Zgc:195170) OS=Danio rerio GN=CH73-137B21.3 PE=4 SV=1	156	-22.44	156	-22.44	23	1244	745	P	GO:0007165	signal transduction
spu-miR-4848b	comp11053_c0_seq2	B8JLX8_DANRE	B8JLX8_DANRE Novel protein (Zgc:195170) OS=Danio rerio GN=CH73-137B21.3 PE=4 SV=1	156	-22.44	156	-22.44	23	1244	745	P	GO:0048583	regulation of response to stimulus
spu-miR-4848b	comp11053_c0_seq2	B8JLX8_DANRE	B8JLX8_DANRE Novel protein (Zgc:195170) OS=Danio rerio GN=CH73-137B21.3 PE=4 SV=1	156	-22.44	156	-22.44	23	1244	745	P	GO:0030001	metal ion transport
spu-miR-4848b	comp11053_c0_seq2	B8JLX8_DANRE	B8JLX8_DANRE Novel protein (Zgc:195170) OS=Danio rerio GN=CH73-137B21.3 PE=4 SV=1	156	-22.44	156	-22.44	23	1244	745	F	GO:0005488	binding
spu-miR-4848b	comp11053_c0_seq2	B8JLX8_DANRE	B8JLX8_DANRE Novel protein (Zgc:195170) OS=Danio rerio GN=CH73-137B21.3 PE=4 SV=1	156	-22.44	156	-22.44	23	1244	745	P	GO:0006996	organelle organization
spu-miR-4848b	comp11053_c0_seq2	B8JLX8_DANRE	B8JLX8_DANRE Novel protein (Zgc:195170) OS=Danio rerio GN=CH73-137B21.3 PE=4 SV=1	156	-22.44	156	-22.44	23	1244	745	P	GO:0010941	regulation of cell death
spu-miR-200	comp11053_c0_seq2	B8JLX8_DANRE	B8JLX8_DANRE Novel protein (Zgc:195170) OS=Danio rerio GN=CH73-137B21.3 PE=4 SV=1	159	-19.42	159	-19.42	23	1244	383	C	GO:0044425	membrane part
spu-miR-200	comp11053_c0_seq2	B8JLX8_DANRE	B8JLX8_DANRE Novel protein (Zgc:195170) OS=Danio rerio GN=CH73-137B21.3 PE=4 SV=1	159	-19.42	159	-19.42	23	1244	383	P	GO:0006873	cellular ion homeostasis
spu-miR-200	comp11053_c0_seq2	B8JLX8_DANRE	B8JLX8_DANRE Novel protein (Zgc:195170) OS=Danio rerio GN=CH73-137B21.3 PE=4 SV=1	159	-19.42	159	-19.42	23	1244	383	P	GO:0019222	regulation of metabolic process
spu-miR-200	comp11053_c0_seq2	B8JLX8_DANRE	B8JLX8_DANRE Novel protein (Zgc:195170) OS=Danio rerio GN=CH73-137B21.3 PE=4 SV=1	159	-19.42	159	-19.42	23	1244	383	P	GO:0006950	response to stress
spu-miR-200	comp11053_c0_seq2	B8JLX8_DANRE	B8JLX8_DANRE Novel protein (Zgc:195170) OS=Danio rerio GN=CH73-137B21.3 PE=4 SV=1	159	-19.42	159	-19.42	23	1244	383	P	GO:0010033	response to organic substance
spu-miR-200	comp11053_c0_seq2	B8JLX8_DANRE	B8JLX8_DANRE Novel protein (Zgc:195170) OS=Danio rerio GN=CH73-137B21.3 PE=4 SV=1	159	-19.42	159	-19.42	23	1244	383	P	GO:0002376	immune system process
spu-miR-200	comp11053_c0_seq2	B8JLX8_DANRE	B8JLX8_DANRE Novel protein (Zgc:195170) OS=Danio rerio GN=CH73-137B21.3 PE=4 SV=1	159	-19.42	159	-19.42	23	1244	383	P	GO:0022607	cellular component assembly
spu-miR-200	comp11053_c0_seq2	B8JLX8_DANRE	B8JLX8_DANRE Novel protein (Zgc:195170) OS=Danio rerio GN=CH73-137B21.3 PE=4 SV=1	159	-19.42	159	-19.42	23	1244	383	P	GO:0001819	positive regulation of cytokine production
spu-miR-200	comp11053_c0_seq2	B8JLX8_DANRE	B8JLX8_DANRE Novel protein (Zgc:195170) OS=Danio rerio GN=CH73-137B21.3 PE=4 SV=1	159	-19.42	159	-19.42	23	1244	383	P	GO:0050714	positive regulation of protein secretion
spu-miR-200	comp11053_c0_seq2	B8JLX8_DANRE	B8JLX8_DANRE Novel protein (Zgc:195170) OS=Danio rerio GN=CH73-137B21.3 PE=4 SV=1	159	-19.42	159	-19.42	23	1244	383	P	GO:0006468	protein phosphorylation
spu-miR-200	comp11053_c0_seq2	B8JLX8_DANRE	B8JLX8_DANRE Novel protein (Zgc:195170) OS=Danio rerio GN=CH73-137B21.3 PE=4 SV=1	159	-19.42	159	-19.42	23	1244	383	P	GO:0007165	signal transduction
spu-miR-200	comp11053_c0_seq2	B8JLX8_DANRE	B8JLX8_DANRE Novel protein (Zgc:195170) OS=Danio rerio GN=CH73-137B21.3 PE=4 SV=1	159	-19.42	159	-19.42	23	1244	383	P	GO:0048583	regulation of response to stimulus
spu-miR-200	comp11053_c0_seq2	B8JLX8_DANRE	B8JLX8_DANRE Novel protein (Zgc:195170) OS=Danio rerio GN=CH73-137B21.3 PE=4 SV=1	159	-19.42	159	-19.42	23	1244	383	P	GO:0030001	metal ion transport
spu-miR-200	comp11053_c0_seq2	B8JLX8_DANRE	B8JLX8_DANRE Novel protein (Zgc:195170) OS=Danio rerio GN=CH73-137B21.3 PE=4 SV=1	159	-19.42	159	-19.42	23	1244	383	F	GO:0005488	binding
spu-miR-200	comp11053_c0_seq2	B8JLX8_DANRE	B8JLX8_DANRE Novel protein (Zgc:195170) OS=Danio rerio GN=CH73-137B21.3 PE=4 SV=1	159	-19.42	159	-19.42	23	1244	383	P	GO:0006996	organelle organization
spu-miR-200	comp11053_c0_seq2	B8JLX8_DANRE	B8JLX8_DANRE Novel protein (Zgc:195170) OS=Danio rerio GN=CH73-137B21.3 PE=4 SV=1	159	-19.42	159	-19.42	23	1244	383	P	GO:0010941	regulation of cell death
spu-miR-92a	comp11080_c0_seq1	NOTC1_DANRE	NOTC1_DANRE Neurogenic locus notch homolog protein 1 OS=Danio rerio GN=notch1a PE=2 SV=1	166	-18.12	166	-18.12	23	2909	1685	P	GO:0042127	regulation of cell proliferation
spu-miR-92a	comp11080_c0_seq1	NOTC1_DANRE	NOTC1_DANRE Neurogenic locus notch homolog protein 1 OS=Danio rerio GN=notch1a PE=2 SV=1	166	-18.12	166	-18.12	23	2909	1685	F	GO:0005488	binding
spu-miR-92a	comp11080_c0_seq1	NOTC1_DANRE	NOTC1_DANRE Neurogenic locus notch homolog protein 1 OS=Danio rerio GN=notch1a PE=2 SV=1	166	-18.12	166	-18.12	23	2909	1685	P	GO:0042981	regulation of apoptotic process
spu-miR-92a	comp11080_c0_seq1	NOTC1_DANRE	NOTC1_DANRE Neurogenic locus notch homolog protein 1 OS=Danio rerio GN=notch1a PE=2 SV=1	166	-18.12	166	-18.12	23	2909	1685	C	GO:0044444	cytoplasmic part
spu-miR-92a	comp11080_c0_seq1	NOTC1_DANRE	NOTC1_DANRE Neurogenic locus notch homolog protein 1 OS=Danio rerio GN=notch1a PE=2 SV=1	166	-18.12	166	-18.12	23	2909	1685	P	GO:0050767	regulation of neurogenesis
spu-miR-92a	comp11080_c0_seq1	NOTC1_DANRE	NOTC1_DANRE Neurogenic locus notch homolog protein 1 OS=Danio rerio GN=notch1a PE=2 SV=1	166	-18.12	166	-18.12	23	2909	1685	P	GO:0072358	cardiovascular system development
spu-miR-92a	comp11080_c0_seq1	NOTC1_DANRE	NOTC1_DANRE Neurogenic locus notch homolog protein 1 OS=Danio rerio GN=notch1a PE=2 SV=1	166	-18.12	166	-18.12	23	2909	1685	P	GO:0040007	growth
spu-miR-92a	comp11080_c0_seq1	NOTC1_DANRE	NOTC1_DANRE Neurogenic locus notch homolog protein 1 OS=Danio rerio GN=notch1a PE=2 SV=1	166	-18.12	166	-18.12	23	2909	1685	P	GO:0016043	cellular component organization
spu-miR-92a	comp11080_c0_seq1	NOTC1_DANRE	NOTC1_DANRE Neurogenic locus notch homolog protein 1 OS=Danio rerio GN=notch1a PE=2 SV=1	166	-18.12	166	-18.12	23	2909	1685	C	GO:0043231	intracellular membrane-bounded organelle
spu-miR-92a	comp11080_c0_seq1	NOTC1_DANRE	NOTC1_DANRE Neurogenic locus notch homolog protein 1 OS=Danio rerio GN=notch1a PE=2 SV=1	166	-18.12	166	-18.12	23	2909	1685	P	GO:0009887	organ morphogenesis
spu-miR-92a	comp11080_c0_seq1	NOTC1_DANRE	NOTC1_DANRE Neurogenic locus notch homolog protein 1 OS=Danio rerio GN=notch1a PE=2 SV=1	166	-18.12	166	-18.12	23	2909	1685	P	GO:0048729	tissue morphogenesis
spu-miR-92a	comp11080_c0_seq1	NOTC1_DANRE	NOTC1_DANRE Neurogenic locus notch homolog protein 1 OS=Danio rerio GN=notch1a PE=2 SV=1	166	-18.12	166	-18.12	23	2909	1685	P	GO:0007166	cell surface receptor signaling pathway
spu-miR-92a	comp11080_c0_seq1	NOTC1_DANRE	NOTC1_DANRE Neurogenic locus notch homolog protein 1 OS=Danio rerio GN=notch1a PE=2 SV=1	166	-18.12	166	-18.12	23	2909	1685	C	GO:0016020	membrane
spu-miR-92a	comp11080_c0_seq1	NOTC1_DANRE	NOTC1_DANRE Neurogenic locus notch homolog protein 1 OS=Danio rerio GN=notch1a PE=2 SV=1	166	-18.12	166	-18.12	23	2909	1685	P	GO:0002376	immune system process
spu-miR-92a	comp11080_c0_seq1	NOTC1_DANRE	NOTC1_DANRE Neurogenic locus notch homolog protein 1 OS=Danio rerio GN=notch1a PE=2 SV=1	166	-18.12	166	-18.12	23	2909	1685	P	GO:0045596	negative regulation of cell differentiation
spu-miR-92a	comp11080_c0_seq1	NOTC1_DANRE	NOTC1_DANRE Neurogenic locus notch homolog protein 1 OS=Danio rerio GN=notch1a PE=2 SV=1	166	-18.12	166	-18.12	23	2909	1685	P	GO:0045597	positive regulation of cell differentiation
spu-miR-92a	comp11080_c0_seq1	NOTC1_DANRE	NOTC1_DANRE Neurogenic locus notch homolog protein 1 OS=Danio rerio GN=notch1a PE=2 SV=1	166	-18.12	166	-18.12	23	2909	1685	P	GO:0030182	neuron differentiation
spu-miR-92a	comp11080_c0_seq1	NOTC1_DANRE	NOTC1_DANRE Neurogenic locus notch homolog protein 1 OS=Danio rerio GN=notch1a PE=2 SV=1	166	-18.12	166	-18.12	23	2909	1685	P	GO:0048646	anatomical structure formation involved in morphogenesis
spu-miR-92a	comp11080_c0_seq1	NOTC1_DANRE	NOTC1_DANRE Neurogenic locus notch homolog protein 1 OS=Danio rerio GN=notch1a PE=2 SV=1	166	-18.12	166	-18.12	23	2909	1685	P	GO:0009967	positive regulation of signal transduction
spu-miR-92a	comp11080_c0_seq1	NOTC1_DANRE	NOTC1_DANRE Neurogenic locus notch homolog protein 1 OS=Danio rerio GN=notch1a PE=2 SV=1	166	-18.12	166	-18.12	23	2909	1685	P	GO:0009952	anterior/posterior pattern specification
spu-miR-92a	comp11080_c0_seq1	NOTC1_DANRE	NOTC1_DANRE Neurogenic locus notch homolog protein 1 OS=Danio rerio GN=notch1a PE=2 SV=1	166	-18.12	166	-18.12	23	2909	1685	P	GO:0043009	chordate embryonic development
spu-miR-92a	comp11080_c0_seq1	NOTC1_DANRE	NOTC1_DANRE Neurogenic locus notch homolog protein 1 OS=Danio rerio GN=notch1a PE=2 SV=1	166	-18.12	166	-18.12	23	2909	1685	P	GO:0022603	regulation of anatomical structure morphogenesis
spu-miR-92a	comp11080_c0_seq1	NOTC1_DANRE	NOTC1_DANRE Neurogenic locus notch homolog protein 1 OS=Danio rerio GN=notch1a PE=2 SV=1	166	-18.12	166	-18.12	23	2909	1685	P	GO:0045165	cell fate commitment
spu-miR-92a	comp11080_c0_seq1	NOTC1_DANRE	NOTC1_DANRE Neurogenic locus notch homolog protein 1 OS=Danio rerio GN=notch1a PE=2 SV=1	166	-18.12	166	-18.12	23	2909	1685	P	GO:0048598	embryonic morphogenesis
spu-miR-92a	comp11080_c0_seq1	NOTC1_DANRE	NOTC1_DANRE Neurogenic locus notch homolog protein 1 OS=Danio rerio GN=notch1a PE=2 SV=1	166	-18.12	166	-18.12	23	2909	1685	P	GO:0006355	regulation of transcription, DNA-dependent
spu-miR-92a	comp11080_c0_seq1	NOTC1_DANRE	NOTC1_DANRE Neurogenic locus notch homolog protein 1 OS=Danio rerio GN=notch1a PE=2 SV=1	166	-18.12	166	-18.12	23	2909	1685	P	GO:0042063	gliogenesis
spu-miR-92a	comp11080_c0_seq1	NOTC1_DANRE	NOTC1_DANRE Neurogenic locus notch homolog protein 1 OS=Danio rerio GN=notch1a PE=2 SV=1	166	-18.12	166	-18.12	23	2909	1685	P	GO:0007417	central nervous system development
spu-miR-92a	comp11080_c0_seq1	NOTC1_DANRE	NOTC1_DANRE Neurogenic locus notch homolog protein 1 OS=Danio rerio GN=notch1a PE=2 SV=1	166	-18.12	166	-18.12	23	2909	1685	P	GO:0060429	epithelium development
spu-miR-2012	comp11080_c0_seq1	NOTC1_DANRE	NOTC1_DANRE Neurogenic locus notch homolog protein 1 OS=Danio rerio GN=notch1a PE=2 SV=1	151	-21.51	151	-21.51	22	2909	2160	P	GO:0042127	regulation of cell proliferation
spu-miR-2012	comp11080_c0_seq1	NOTC1_DANRE	NOTC1_DANRE Neurogenic locus notch homolog protein 1 OS=Danio rerio GN=notch1a PE=2 SV=1	151	-21.51	151	-21.51	22	2909	2160	F	GO:0005488	binding
spu-miR-2012	comp11080_c0_seq1	NOTC1_DANRE	NOTC1_DANRE Neurogenic locus notch homolog protein 1 OS=Danio rerio GN=notch1a PE=2 SV=1	151	-21.51	151	-21.51	22	2909	2160	P	GO:0042981	regulation of apoptotic process
spu-miR-2012	comp11080_c0_seq1	NOTC1_DANRE	NOTC1_DANRE Neurogenic locus notch homolog protein 1 OS=Danio rerio GN=notch1a PE=2 SV=1	151	-21.51	151	-21.51	22	2909	2160	C	GO:0044444	cytoplasmic part
spu-miR-2012	comp11080_c0_seq1	NOTC1_DANRE	NOTC1_DANRE Neurogenic locus notch homolog protein 1 OS=Danio rerio GN=notch1a PE=2 SV=1	151	-21.51	151	-21.51	22	2909	2160	P	GO:0050767	regulation of neurogenesis
spu-miR-2012	comp11080_c0_seq1	NOTC1_DANRE	NOTC1_DANRE Neurogenic locus notch homolog protein 1 OS=Danio rerio GN=notch1a PE=2 SV=1	151	-21.51	151	-21.51	22	2909	2160	P	GO:0072358	cardiovascular system development
spu-miR-2012	comp11080_c0_seq1	NOTC1_DANRE	NOTC1_DANRE Neurogenic locus notch homolog protein 1 OS=Danio rerio GN=notch1a PE=2 SV=1	151	-21.51	151	-21.51	22	2909	2160	P	GO:0040007	growth
spu-miR-2012	comp11080_c0_seq1	NOTC1_DANRE	NOTC1_DANRE Neurogenic locus notch homolog protein 1 OS=Danio rerio GN=notch1a PE=2 SV=1	151	-21.51	151	-21.51	22	2909	2160	P	GO:0016043	cellular component organization
spu-miR-2012	comp11080_c0_seq1	NOTC1_DANRE	NOTC1_DANRE Neurogenic locus notch homolog protein 1 OS=Danio rerio GN=notch1a PE=2 SV=1	151	-21.51	151	-21.51	22	2909	2160	C	GO:0043231	intracellular membrane-bounded organelle
spu-miR-2012	comp11080_c0_seq1	NOTC1_DANRE	NOTC1_DANRE Neurogenic locus notch homolog protein 1 OS=Danio rerio GN=notch1a PE=2 SV=1	151	-21.51	151	-21.51	22	2909	2160	P	GO:0009887	organ morphogenesis
spu-miR-2012	comp11080_c0_seq1	NOTC1_DANRE	NOTC1_DANRE Neurogenic locus notch homolog protein 1 OS=Danio rerio GN=notch1a PE=2 SV=1	151	-21.51	151	-21.51	22	2909	2160	P	GO:0048729	tissue morphogenesis
spu-miR-2012	comp11080_c0_seq1	NOTC1_DANRE	NOTC1_DANRE Neurogenic locus notch homolog protein 1 OS=Danio rerio GN=notch1a PE=2 SV=1	151	-21.51	151	-21.51	22	2909	2160	P	GO:0007166	cell surface receptor signaling pathway
spu-miR-2012	comp11080_c0_seq1	NOTC1_DANRE	NOTC1_DANRE Neurogenic locus notch homolog protein 1 OS=Danio rerio GN=notch1a PE=2 SV=1	151	-21.51	151	-21.51	22	2909	2160	C	GO:0016020	membrane
spu-miR-2012	comp11080_c0_seq1	NOTC1_DANRE	NOTC1_DANRE Neurogenic locus notch homolog protein 1 OS=Danio rerio GN=notch1a PE=2 SV=1	151	-21.51	151	-21.51	22	2909	2160	P	GO:0002376	immune system process
spu-miR-2012	comp11080_c0_seq1	NOTC1_DANRE	NOTC1_DANRE Neurogenic locus notch homolog protein 1 OS=Danio rerio GN=notch1a PE=2 SV=1	151	-21.51	151	-21.51	22	2909	2160	P	GO:0045596	negative regulation of cell differentiation
spu-miR-2012	comp11080_c0_seq1	NOTC1_DANRE	NOTC1_DANRE Neurogenic locus notch homolog protein 1 OS=Danio rerio GN=notch1a PE=2 SV=1	151	-21.51	151	-21.51	22	2909	2160	P	GO:0045597	positive regulation of cell differentiation
spu-miR-2012	comp11080_c0_seq1	NOTC1_DANRE	NOTC1_DANRE Neurogenic locus notch homolog protein 1 OS=Danio rerio GN=notch1a PE=2 SV=1	151	-21.51	151	-21.51	22	2909	2160	P	GO:0030182	neuron differentiation
spu-miR-2012	comp11080_c0_seq1	NOTC1_DANRE	NOTC1_DANRE Neurogenic locus notch homolog protein 1 OS=Danio rerio GN=notch1a PE=2 SV=1	151	-21.51	151	-21.51	22	2909	2160	P	GO:0048646	anatomical structure formation involved in morphogenesis
spu-miR-2012	comp11080_c0_seq1	NOTC1_DANRE	NOTC1_DANRE Neurogenic locus notch homolog protein 1 OS=Danio rerio GN=notch1a PE=2 SV=1	151	-21.51	151	-21.51	22	2909	2160	P	GO:0009967	positive regulation of signal transduction
spu-miR-2012	comp11080_c0_seq1	NOTC1_DANRE	NOTC1_DANRE Neurogenic locus notch homolog protein 1 OS=Danio rerio GN=notch1a PE=2 SV=1	151	-21.51	151	-21.51	22	2909	2160	P	GO:0009952	anterior/posterior pattern specification
spu-miR-2012	comp11080_c0_seq1	NOTC1_DANRE	NOTC1_DANRE Neurogenic locus notch homolog protein 1 OS=Danio rerio GN=notch1a PE=2 SV=1	151	-21.51	151	-21.51	22	2909	2160	P	GO:0043009	chordate embryonic development
spu-miR-2012	comp11080_c0_seq1	NOTC1_DANRE	NOTC1_DANRE Neurogenic locus notch homolog protein 1 OS=Danio rerio GN=notch1a PE=2 SV=1	151	-21.51	151	-21.51	22	2909	2160	P	GO:0022603	regulation of anatomical structure morphogenesis
spu-miR-2012	comp11080_c0_seq1	NOTC1_DANRE	NOTC1_DANRE Neurogenic locus notch homolog protein 1 OS=Danio rerio GN=notch1a PE=2 SV=1	151	-21.51	151	-21.51	22	2909	2160	P	GO:0045165	cell fate commitment
spu-miR-2012	comp11080_c0_seq1	NOTC1_DANRE	NOTC1_DANRE Neurogenic locus notch homolog protein 1 OS=Danio rerio GN=notch1a PE=2 SV=1	151	-21.51	151	-21.51	22	2909	2160	P	GO:0048598	embryonic morphogenesis
spu-miR-2012	comp11080_c0_seq1	NOTC1_DANRE	NOTC1_DANRE Neurogenic locus notch homolog protein 1 OS=Danio rerio GN=notch1a PE=2 SV=1	151	-21.51	151	-21.51	22	2909	2160	P	GO:0006355	regulation of transcription, DNA-dependent
spu-miR-2012	comp11080_c0_seq1	NOTC1_DANRE	NOTC1_DANRE Neurogenic locus notch homolog protein 1 OS=Danio rerio GN=notch1a PE=2 SV=1	151	-21.51	151	-21.51	22	2909	2160	P	GO:0042063	gliogenesis
spu-miR-2012	comp11080_c0_seq1	NOTC1_DANRE	NOTC1_DANRE Neurogenic locus notch homolog protein 1 OS=Danio rerio GN=notch1a PE=2 SV=1	151	-21.51	151	-21.51	22	2909	2160	P	GO:0007417	central nervous system development
spu-miR-2012	comp11080_c0_seq1	NOTC1_DANRE	NOTC1_DANRE Neurogenic locus notch homolog protein 1 OS=Danio rerio GN=notch1a PE=2 SV=1	151	-21.51	151	-21.51	22	2909	2160	P	GO:0060429	epithelium development
spu-miR-182	comp11080_c0_seq1	NOTC1_DANRE	NOTC1_DANRE Neurogenic locus notch homolog protein 1 OS=Danio rerio GN=notch1a PE=2 SV=1	288	-31.74	148	-18.15	25	2909	332 1556	P	GO:0042127	regulation of cell proliferation
spu-miR-182	comp11080_c0_seq1	NOTC1_DANRE	NOTC1_DANRE Neurogenic locus notch homolog protein 1 OS=Danio rerio GN=notch1a PE=2 SV=1	288	-31.74	148	-18.15	25	2909	332 1556	F	GO:0005488	binding
spu-miR-182	comp11080_c0_seq1	NOTC1_DANRE	NOTC1_DANRE Neurogenic locus notch homolog protein 1 OS=Danio rerio GN=notch1a PE=2 SV=1	288	-31.74	148	-18.15	25	2909	332 1556	P	GO:0042981	regulation of apoptotic process
spu-miR-182	comp11080_c0_seq1	NOTC1_DANRE	NOTC1_DANRE Neurogenic locus notch homolog protein 1 OS=Danio rerio GN=notch1a PE=2 SV=1	288	-31.74	148	-18.15	25	2909	332 1556	C	GO:0044444	cytoplasmic part
spu-miR-182	comp11080_c0_seq1	NOTC1_DANRE	NOTC1_DANRE Neurogenic locus notch homolog protein 1 OS=Danio rerio GN=notch1a PE=2 SV=1	288	-31.74	148	-18.15	25	2909	332 1556	P	GO:0050767	regulation of neurogenesis
spu-miR-182	comp11080_c0_seq1	NOTC1_DANRE	NOTC1_DANRE Neurogenic locus notch homolog protein 1 OS=Danio rerio GN=notch1a PE=2 SV=1	288	-31.74	148	-18.15	25	2909	332 1556	P	GO:0072358	cardiovascular system development
spu-miR-182	comp11080_c0_seq1	NOTC1_DANRE	NOTC1_DANRE Neurogenic locus notch homolog protein 1 OS=Danio rerio GN=notch1a PE=2 SV=1	288	-31.74	148	-18.15	25	2909	332 1556	P	GO:0040007	growth
spu-miR-182	comp11080_c0_seq1	NOTC1_DANRE	NOTC1_DANRE Neurogenic locus notch homolog protein 1 OS=Danio rerio GN=notch1a PE=2 SV=1	288	-31.74	148	-18.15	25	2909	332 1556	P	GO:0016043	cellular component organization
spu-miR-182	comp11080_c0_seq1	NOTC1_DANRE	NOTC1_DANRE Neurogenic locus notch homolog protein 1 OS=Danio rerio GN=notch1a PE=2 SV=1	288	-31.74	148	-18.15	25	2909	332 1556	C	GO:0043231	intracellular membrane-bounded organelle
spu-miR-182	comp11080_c0_seq1	NOTC1_DANRE	NOTC1_DANRE Neurogenic locus notch homolog protein 1 OS=Danio rerio GN=notch1a PE=2 SV=1	288	-31.74	148	-18.15	25	2909	332 1556	P	GO:0009887	organ morphogenesis
spu-miR-182	comp11080_c0_seq1	NOTC1_DANRE	NOTC1_DANRE Neurogenic locus notch homolog protein 1 OS=Danio rerio GN=notch1a PE=2 SV=1	288	-31.74	148	-18.15	25	2909	332 1556	P	GO:0048729	tissue morphogenesis
spu-miR-182	comp11080_c0_seq1	NOTC1_DANRE	NOTC1_DANRE Neurogenic locus notch homolog protein 1 OS=Danio rerio GN=notch1a PE=2 SV=1	288	-31.74	148	-18.15	25	2909	332 1556	P	GO:0007166	cell surface receptor signaling pathway
spu-miR-182	comp11080_c0_seq1	NOTC1_DANRE	NOTC1_DANRE Neurogenic locus notch homolog protein 1 OS=Danio rerio GN=notch1a PE=2 SV=1	288	-31.74	148	-18.15	25	2909	332 1556	C	GO:0016020	membrane
spu-miR-182	comp11080_c0_seq1	NOTC1_DANRE	NOTC1_DANRE Neurogenic locus notch homolog protein 1 OS=Danio rerio GN=notch1a PE=2 SV=1	288	-31.74	148	-18.15	25	2909	332 1556	P	GO:0002376	immune system process
spu-miR-182	comp11080_c0_seq1	NOTC1_DANRE	NOTC1_DANRE Neurogenic locus notch homolog protein 1 OS=Danio rerio GN=notch1a PE=2 SV=1	288	-31.74	148	-18.15	25	2909	332 1556	P	GO:0045596	negative regulation of cell differentiation
spu-miR-182	comp11080_c0_seq1	NOTC1_DANRE	NOTC1_DANRE Neurogenic locus notch homolog protein 1 OS=Danio rerio GN=notch1a PE=2 SV=1	288	-31.74	148	-18.15	25	2909	332 1556	P	GO:0045597	positive regulation of cell differentiation
spu-miR-182	comp11080_c0_seq1	NOTC1_DANRE	NOTC1_DANRE Neurogenic locus notch homolog protein 1 OS=Danio rerio GN=notch1a PE=2 SV=1	288	-31.74	148	-18.15	25	2909	332 1556	P	GO:0030182	neuron differentiation
spu-miR-182	comp11080_c0_seq1	NOTC1_DANRE	NOTC1_DANRE Neurogenic locus notch homolog protein 1 OS=Danio rerio GN=notch1a PE=2 SV=1	288	-31.74	148	-18.15	25	2909	332 1556	P	GO:0048646	anatomical structure formation involved in morphogenesis
spu-miR-182	comp11080_c0_seq1	NOTC1_DANRE	NOTC1_DANRE Neurogenic locus notch homolog protein 1 OS=Danio rerio GN=notch1a PE=2 SV=1	288	-31.74	148	-18.15	25	2909	332 1556	P	GO:0009967	positive regulation of signal transduction
spu-miR-182	comp11080_c0_seq1	NOTC1_DANRE	NOTC1_DANRE Neurogenic locus notch homolog protein 1 OS=Danio rerio GN=notch1a PE=2 SV=1	288	-31.74	148	-18.15	25	2909	332 1556	P	GO:0009952	anterior/posterior pattern specification
spu-miR-182	comp11080_c0_seq1	NOTC1_DANRE	NOTC1_DANRE Neurogenic locus notch homolog protein 1 OS=Danio rerio GN=notch1a PE=2 SV=1	288	-31.74	148	-18.15	25	2909	332 1556	P	GO:0043009	chordate embryonic development
spu-miR-182	comp11080_c0_seq1	NOTC1_DANRE	NOTC1_DANRE Neurogenic locus notch homolog protein 1 OS=Danio rerio GN=notch1a PE=2 SV=1	288	-31.74	148	-18.15	25	2909	332 1556	P	GO:0022603	regulation of anatomical structure morphogenesis
spu-miR-182	comp11080_c0_seq1	NOTC1_DANRE	NOTC1_DANRE Neurogenic locus notch homolog protein 1 OS=Danio rerio GN=notch1a PE=2 SV=1	288	-31.74	148	-18.15	25	2909	332 1556	P	GO:0045165	cell fate commitment
spu-miR-182	comp11080_c0_seq1	NOTC1_DANRE	NOTC1_DANRE Neurogenic locus notch homolog protein 1 OS=Danio rerio GN=notch1a PE=2 SV=1	288	-31.74	148	-18.15	25	2909	332 1556	P	GO:0048598	embryonic morphogenesis
spu-miR-182	comp11080_c0_seq1	NOTC1_DANRE	NOTC1_DANRE Neurogenic locus notch homolog protein 1 OS=Danio rerio GN=notch1a PE=2 SV=1	288	-31.74	148	-18.15	25	2909	332 1556	P	GO:0006355	regulation of transcription, DNA-dependent
spu-miR-182	comp11080_c0_seq1	NOTC1_DANRE	NOTC1_DANRE Neurogenic locus notch homolog protein 1 OS=Danio rerio GN=notch1a PE=2 SV=1	288	-31.74	148	-18.15	25	2909	332 1556	P	GO:0042063	gliogenesis
spu-miR-182	comp11080_c0_seq1	NOTC1_DANRE	NOTC1_DANRE Neurogenic locus notch homolog protein 1 OS=Danio rerio GN=notch1a PE=2 SV=1	288	-31.74	148	-18.15	25	2909	332 1556	P	GO:0007417	central nervous system development
spu-miR-182	comp11080_c0_seq1	NOTC1_DANRE	NOTC1_DANRE Neurogenic locus notch homolog protein 1 OS=Danio rerio GN=notch1a PE=2 SV=1	288	-31.74	148	-18.15	25	2909	332 1556	P	GO:0060429	epithelium development
spu-miR-92b	comp11080_c0_seq1	NOTC1_DANRE	NOTC1_DANRE Neurogenic locus notch homolog protein 1 OS=Danio rerio GN=notch1a PE=2 SV=1	166	-18.12	166	-18.12	22	2909	1686	P	GO:0042127	regulation of cell proliferation
spu-miR-92b	comp11080_c0_seq1	NOTC1_DANRE	NOTC1_DANRE Neurogenic locus notch homolog protein 1 OS=Danio rerio GN=notch1a PE=2 SV=1	166	-18.12	166	-18.12	22	2909	1686	F	GO:0005488	binding
spu-miR-92b	comp11080_c0_seq1	NOTC1_DANRE	NOTC1_DANRE Neurogenic locus notch homolog protein 1 OS=Danio rerio GN=notch1a PE=2 SV=1	166	-18.12	166	-18.12	22	2909	1686	P	GO:0042981	regulation of apoptotic process
spu-miR-92b	comp11080_c0_seq1	NOTC1_DANRE	NOTC1_DANRE Neurogenic locus notch homolog protein 1 OS=Danio rerio GN=notch1a PE=2 SV=1	166	-18.12	166	-18.12	22	2909	1686	C	GO:0044444	cytoplasmic part
spu-miR-92b	comp11080_c0_seq1	NOTC1_DANRE	NOTC1_DANRE Neurogenic locus notch homolog protein 1 OS=Danio rerio GN=notch1a PE=2 SV=1	166	-18.12	166	-18.12	22	2909	1686	P	GO:0050767	regulation of neurogenesis
spu-miR-92b	comp11080_c0_seq1	NOTC1_DANRE	NOTC1_DANRE Neurogenic locus notch homolog protein 1 OS=Danio rerio GN=notch1a PE=2 SV=1	166	-18.12	166	-18.12	22	2909	1686	P	GO:0072358	cardiovascular system development
spu-miR-92b	comp11080_c0_seq1	NOTC1_DANRE	NOTC1_DANRE Neurogenic locus notch homolog protein 1 OS=Danio rerio GN=notch1a PE=2 SV=1	166	-18.12	166	-18.12	22	2909	1686	P	GO:0040007	growth
spu-miR-92b	comp11080_c0_seq1	NOTC1_DANRE	NOTC1_DANRE Neurogenic locus notch homolog protein 1 OS=Danio rerio GN=notch1a PE=2 SV=1	166	-18.12	166	-18.12	22	2909	1686	P	GO:0016043	cellular component organization
spu-miR-92b	comp11080_c0_seq1	NOTC1_DANRE	NOTC1_DANRE Neurogenic locus notch homolog protein 1 OS=Danio rerio GN=notch1a PE=2 SV=1	166	-18.12	166	-18.12	22	2909	1686	C	GO:0043231	intracellular membrane-bounded organelle
spu-miR-92b	comp11080_c0_seq1	NOTC1_DANRE	NOTC1_DANRE Neurogenic locus notch homolog protein 1 OS=Danio rerio GN=notch1a PE=2 SV=1	166	-18.12	166	-18.12	22	2909	1686	P	GO:0009887	organ morphogenesis
spu-miR-92b	comp11080_c0_seq1	NOTC1_DANRE	NOTC1_DANRE Neurogenic locus notch homolog protein 1 OS=Danio rerio GN=notch1a PE=2 SV=1	166	-18.12	166	-18.12	22	2909	1686	P	GO:0048729	tissue morphogenesis
spu-miR-92b	comp11080_c0_seq1	NOTC1_DANRE	NOTC1_DANRE Neurogenic locus notch homolog protein 1 OS=Danio rerio GN=notch1a PE=2 SV=1	166	-18.12	166	-18.12	22	2909	1686	P	GO:0007166	cell surface receptor signaling pathway
spu-miR-92b	comp11080_c0_seq1	NOTC1_DANRE	NOTC1_DANRE Neurogenic locus notch homolog protein 1 OS=Danio rerio GN=notch1a PE=2 SV=1	166	-18.12	166	-18.12	22	2909	1686	C	GO:0016020	membrane
spu-miR-92b	comp11080_c0_seq1	NOTC1_DANRE	NOTC1_DANRE Neurogenic locus notch homolog protein 1 OS=Danio rerio GN=notch1a PE=2 SV=1	166	-18.12	166	-18.12	22	2909	1686	P	GO:0002376	immune system process
spu-miR-92b	comp11080_c0_seq1	NOTC1_DANRE	NOTC1_DANRE Neurogenic locus notch homolog protein 1 OS=Danio rerio GN=notch1a PE=2 SV=1	166	-18.12	166	-18.12	22	2909	1686	P	GO:0045596	negative regulation of cell differentiation
spu-miR-92b	comp11080_c0_seq1	NOTC1_DANRE	NOTC1_DANRE Neurogenic locus notch homolog protein 1 OS=Danio rerio GN=notch1a PE=2 SV=1	166	-18.12	166	-18.12	22	2909	1686	P	GO:0045597	positive regulation of cell differentiation
spu-miR-92b	comp11080_c0_seq1	NOTC1_DANRE	NOTC1_DANRE Neurogenic locus notch homolog protein 1 OS=Danio rerio GN=notch1a PE=2 SV=1	166	-18.12	166	-18.12	22	2909	1686	P	GO:0030182	neuron differentiation
spu-miR-92b	comp11080_c0_seq1	NOTC1_DANRE	NOTC1_DANRE Neurogenic locus notch homolog protein 1 OS=Danio rerio GN=notch1a PE=2 SV=1	166	-18.12	166	-18.12	22	2909	1686	P	GO:0048646	anatomical structure formation involved in morphogenesis
spu-miR-92b	comp11080_c0_seq1	NOTC1_DANRE	NOTC1_DANRE Neurogenic locus notch homolog protein 1 OS=Danio rerio GN=notch1a PE=2 SV=1	166	-18.12	166	-18.12	22	2909	1686	P	GO:0009967	positive regulation of signal transduction
spu-miR-92b	comp11080_c0_seq1	NOTC1_DANRE	NOTC1_DANRE Neurogenic locus notch homolog protein 1 OS=Danio rerio GN=notch1a PE=2 SV=1	166	-18.12	166	-18.12	22	2909	1686	P	GO:0009952	anterior/posterior pattern specification
spu-miR-92b	comp11080_c0_seq1	NOTC1_DANRE	NOTC1_DANRE Neurogenic locus notch homolog protein 1 OS=Danio rerio GN=notch1a PE=2 SV=1	166	-18.12	166	-18.12	22	2909	1686	P	GO:0043009	chordate embryonic development
spu-miR-92b	comp11080_c0_seq1	NOTC1_DANRE	NOTC1_DANRE Neurogenic locus notch homolog protein 1 OS=Danio rerio GN=notch1a PE=2 SV=1	166	-18.12	166	-18.12	22	2909	1686	P	GO:0022603	regulation of anatomical structure morphogenesis
spu-miR-92b	comp11080_c0_seq1	NOTC1_DANRE	NOTC1_DANRE Neurogenic locus notch homolog protein 1 OS=Danio rerio GN=notch1a PE=2 SV=1	166	-18.12	166	-18.12	22	2909	1686	P	GO:0045165	cell fate commitment
spu-miR-92b	comp11080_c0_seq1	NOTC1_DANRE	NOTC1_DANRE Neurogenic locus notch homolog protein 1 OS=Danio rerio GN=notch1a PE=2 SV=1	166	-18.12	166	-18.12	22	2909	1686	P	GO:0048598	embryonic morphogenesis
spu-miR-92b	comp11080_c0_seq1	NOTC1_DANRE	NOTC1_DANRE Neurogenic locus notch homolog protein 1 OS=Danio rerio GN=notch1a PE=2 SV=1	166	-18.12	166	-18.12	22	2909	1686	P	GO:0006355	regulation of transcription, DNA-dependent
spu-miR-92b	comp11080_c0_seq1	NOTC1_DANRE	NOTC1_DANRE Neurogenic locus notch homolog protein 1 OS=Danio rerio GN=notch1a PE=2 SV=1	166	-18.12	166	-18.12	22	2909	1686	P	GO:0042063	gliogenesis
spu-miR-92b	comp11080_c0_seq1	NOTC1_DANRE	NOTC1_DANRE Neurogenic locus notch homolog protein 1 OS=Danio rerio GN=notch1a PE=2 SV=1	166	-18.12	166	-18.12	22	2909	1686	P	GO:0007417	central nervous system development
spu-miR-92b	comp11080_c0_seq1	NOTC1_DANRE	NOTC1_DANRE Neurogenic locus notch homolog protein 1 OS=Danio rerio GN=notch1a PE=2 SV=1	166	-18.12	166	-18.12	22	2909	1686	P	GO:0060429	epithelium development
spu-miR-133	comp11080_c0_seq1	NOTC1_DANRE	NOTC1_DANRE Neurogenic locus notch homolog protein 1 OS=Danio rerio GN=notch1a PE=2 SV=1	144	-20.53	144	-20.53	23	2909	2264	P	GO:0042127	regulation of cell proliferation
spu-miR-133	comp11080_c0_seq1	NOTC1_DANRE	NOTC1_DANRE Neurogenic locus notch homolog protein 1 OS=Danio rerio GN=notch1a PE=2 SV=1	144	-20.53	144	-20.53	23	2909	2264	F	GO:0005488	binding
spu-miR-133	comp11080_c0_seq1	NOTC1_DANRE	NOTC1_DANRE Neurogenic locus notch homolog protein 1 OS=Danio rerio GN=notch1a PE=2 SV=1	144	-20.53	144	-20.53	23	2909	2264	P	GO:0042981	regulation of apoptotic process
spu-miR-133	comp11080_c0_seq1	NOTC1_DANRE	NOTC1_DANRE Neurogenic locus notch homolog protein 1 OS=Danio rerio GN=notch1a PE=2 SV=1	144	-20.53	144	-20.53	23	2909	2264	C	GO:0044444	cytoplasmic part
spu-miR-133	comp11080_c0_seq1	NOTC1_DANRE	NOTC1_DANRE Neurogenic locus notch homolog protein 1 OS=Danio rerio GN=notch1a PE=2 SV=1	144	-20.53	144	-20.53	23	2909	2264	P	GO:0050767	regulation of neurogenesis
spu-miR-133	comp11080_c0_seq1	NOTC1_DANRE	NOTC1_DANRE Neurogenic locus notch homolog protein 1 OS=Danio rerio GN=notch1a PE=2 SV=1	144	-20.53	144	-20.53	23	2909	2264	P	GO:0072358	cardiovascular system development
spu-miR-133	comp11080_c0_seq1	NOTC1_DANRE	NOTC1_DANRE Neurogenic locus notch homolog protein 1 OS=Danio rerio GN=notch1a PE=2 SV=1	144	-20.53	144	-20.53	23	2909	2264	P	GO:0040007	growth
spu-miR-133	comp11080_c0_seq1	NOTC1_DANRE	NOTC1_DANRE Neurogenic locus notch homolog protein 1 OS=Danio rerio GN=notch1a PE=2 SV=1	144	-20.53	144	-20.53	23	2909	2264	P	GO:0016043	cellular component organization
spu-miR-133	comp11080_c0_seq1	NOTC1_DANRE	NOTC1_DANRE Neurogenic locus notch homolog protein 1 OS=Danio rerio GN=notch1a PE=2 SV=1	144	-20.53	144	-20.53	23	2909	2264	C	GO:0043231	intracellular membrane-bounded organelle
spu-miR-133	comp11080_c0_seq1	NOTC1_DANRE	NOTC1_DANRE Neurogenic locus notch homolog protein 1 OS=Danio rerio GN=notch1a PE=2 SV=1	144	-20.53	144	-20.53	23	2909	2264	P	GO:0009887	organ morphogenesis
spu-miR-133	comp11080_c0_seq1	NOTC1_DANRE	NOTC1_DANRE Neurogenic locus notch homolog protein 1 OS=Danio rerio GN=notch1a PE=2 SV=1	144	-20.53	144	-20.53	23	2909	2264	P	GO:0048729	tissue morphogenesis
spu-miR-133	comp11080_c0_seq1	NOTC1_DANRE	NOTC1_DANRE Neurogenic locus notch homolog protein 1 OS=Danio rerio GN=notch1a PE=2 SV=1	144	-20.53	144	-20.53	23	2909	2264	P	GO:0007166	cell surface receptor signaling pathway
spu-miR-133	comp11080_c0_seq1	NOTC1_DANRE	NOTC1_DANRE Neurogenic locus notch homolog protein 1 OS=Danio rerio GN=notch1a PE=2 SV=1	144	-20.53	144	-20.53	23	2909	2264	C	GO:0016020	membrane
spu-miR-133	comp11080_c0_seq1	NOTC1_DANRE	NOTC1_DANRE Neurogenic locus notch homolog protein 1 OS=Danio rerio GN=notch1a PE=2 SV=1	144	-20.53	144	-20.53	23	2909	2264	P	GO:0002376	immune system process
spu-miR-133	comp11080_c0_seq1	NOTC1_DANRE	NOTC1_DANRE Neurogenic locus notch homolog protein 1 OS=Danio rerio GN=notch1a PE=2 SV=1	144	-20.53	144	-20.53	23	2909	2264	P	GO:0045596	negative regulation of cell differentiation
spu-miR-133	comp11080_c0_seq1	NOTC1_DANRE	NOTC1_DANRE Neurogenic locus notch homolog protein 1 OS=Danio rerio GN=notch1a PE=2 SV=1	144	-20.53	144	-20.53	23	2909	2264	P	GO:0045597	positive regulation of cell differentiation
spu-miR-133	comp11080_c0_seq1	NOTC1_DANRE	NOTC1_DANRE Neurogenic locus notch homolog protein 1 OS=Danio rerio GN=notch1a PE=2 SV=1	144	-20.53	144	-20.53	23	2909	2264	P	GO:0030182	neuron differentiation
spu-miR-133	comp11080_c0_seq1	NOTC1_DANRE	NOTC1_DANRE Neurogenic locus notch homolog protein 1 OS=Danio rerio GN=notch1a PE=2 SV=1	144	-20.53	144	-20.53	23	2909	2264	P	GO:0048646	anatomical structure formation involved in morphogenesis
spu-miR-133	comp11080_c0_seq1	NOTC1_DANRE	NOTC1_DANRE Neurogenic locus notch homolog protein 1 OS=Danio rerio GN=notch1a PE=2 SV=1	144	-20.53	144	-20.53	23	2909	2264	P	GO:0009967	positive regulation of signal transduction
spu-miR-133	comp11080_c0_seq1	NOTC1_DANRE	NOTC1_DANRE Neurogenic locus notch homolog protein 1 OS=Danio rerio GN=notch1a PE=2 SV=1	144	-20.53	144	-20.53	23	2909	2264	P	GO:0009952	anterior/posterior pattern specification
spu-miR-133	comp11080_c0_seq1	NOTC1_DANRE	NOTC1_DANRE Neurogenic locus notch homolog protein 1 OS=Danio rerio GN=notch1a PE=2 SV=1	144	-20.53	144	-20.53	23	2909	2264	P	GO:0043009	chordate embryonic development
spu-miR-133	comp11080_c0_seq1	NOTC1_DANRE	NOTC1_DANRE Neurogenic locus notch homolog protein 1 OS=Danio rerio GN=notch1a PE=2 SV=1	144	-20.53	144	-20.53	23	2909	2264	P	GO:0022603	regulation of anatomical structure morphogenesis
spu-miR-133	comp11080_c0_seq1	NOTC1_DANRE	NOTC1_DANRE Neurogenic locus notch homolog protein 1 OS=Danio rerio GN=notch1a PE=2 SV=1	144	-20.53	144	-20.53	23	2909	2264	P	GO:0045165	cell fate commitment
spu-miR-133	comp11080_c0_seq1	NOTC1_DANRE	NOTC1_DANRE Neurogenic locus notch homolog protein 1 OS=Danio rerio GN=notch1a PE=2 SV=1	144	-20.53	144	-20.53	23	2909	2264	P	GO:0048598	embryonic morphogenesis
spu-miR-133	comp11080_c0_seq1	NOTC1_DANRE	NOTC1_DANRE Neurogenic locus notch homolog protein 1 OS=Danio rerio GN=notch1a PE=2 SV=1	144	-20.53	144	-20.53	23	2909	2264	P	GO:0006355	regulation of transcription, DNA-dependent
spu-miR-133	comp11080_c0_seq1	NOTC1_DANRE	NOTC1_DANRE Neurogenic locus notch homolog protein 1 OS=Danio rerio GN=notch1a PE=2 SV=1	144	-20.53	144	-20.53	23	2909	2264	P	GO:0042063	gliogenesis
spu-miR-133	comp11080_c0_seq1	NOTC1_DANRE	NOTC1_DANRE Neurogenic locus notch homolog protein 1 OS=Danio rerio GN=notch1a PE=2 SV=1	144	-20.53	144	-20.53	23	2909	2264	P	GO:0007417	central nervous system development
spu-miR-133	comp11080_c0_seq1	NOTC1_DANRE	NOTC1_DANRE Neurogenic locus notch homolog protein 1 OS=Danio rerio GN=notch1a PE=2 SV=1	144	-20.53	144	-20.53	23	2909	2264	P	GO:0060429	epithelium development
spu-miR-2007	comp11080_c0_seq1	NOTC1_DANRE	NOTC1_DANRE Neurogenic locus notch homolog protein 1 OS=Danio rerio GN=notch1a PE=2 SV=1	144	-19.73	144	-19.73	23	2909	1812	P	GO:0042127	regulation of cell proliferation
spu-miR-2007	comp11080_c0_seq1	NOTC1_DANRE	NOTC1_DANRE Neurogenic locus notch homolog protein 1 OS=Danio rerio GN=notch1a PE=2 SV=1	144	-19.73	144	-19.73	23	2909	1812	F	GO:0005488	binding
spu-miR-2007	comp11080_c0_seq1	NOTC1_DANRE	NOTC1_DANRE Neurogenic locus notch homolog protein 1 OS=Danio rerio GN=notch1a PE=2 SV=1	144	-19.73	144	-19.73	23	2909	1812	P	GO:0042981	regulation of apoptotic process
spu-miR-2007	comp11080_c0_seq1	NOTC1_DANRE	NOTC1_DANRE Neurogenic locus notch homolog protein 1 OS=Danio rerio GN=notch1a PE=2 SV=1	144	-19.73	144	-19.73	23	2909	1812	C	GO:0044444	cytoplasmic part
spu-miR-2007	comp11080_c0_seq1	NOTC1_DANRE	NOTC1_DANRE Neurogenic locus notch homolog protein 1 OS=Danio rerio GN=notch1a PE=2 SV=1	144	-19.73	144	-19.73	23	2909	1812	P	GO:0050767	regulation of neurogenesis
spu-miR-2007	comp11080_c0_seq1	NOTC1_DANRE	NOTC1_DANRE Neurogenic locus notch homolog protein 1 OS=Danio rerio GN=notch1a PE=2 SV=1	144	-19.73	144	-19.73	23	2909	1812	P	GO:0072358	cardiovascular system development
spu-miR-2007	comp11080_c0_seq1	NOTC1_DANRE	NOTC1_DANRE Neurogenic locus notch homolog protein 1 OS=Danio rerio GN=notch1a PE=2 SV=1	144	-19.73	144	-19.73	23	2909	1812	P	GO:0040007	growth
spu-miR-2007	comp11080_c0_seq1	NOTC1_DANRE	NOTC1_DANRE Neurogenic locus notch homolog protein 1 OS=Danio rerio GN=notch1a PE=2 SV=1	144	-19.73	144	-19.73	23	2909	1812	P	GO:0016043	cellular component organization
spu-miR-2007	comp11080_c0_seq1	NOTC1_DANRE	NOTC1_DANRE Neurogenic locus notch homolog protein 1 OS=Danio rerio GN=notch1a PE=2 SV=1	144	-19.73	144	-19.73	23	2909	1812	C	GO:0043231	intracellular membrane-bounded organelle
spu-miR-2007	comp11080_c0_seq1	NOTC1_DANRE	NOTC1_DANRE Neurogenic locus notch homolog protein 1 OS=Danio rerio GN=notch1a PE=2 SV=1	144	-19.73	144	-19.73	23	2909	1812	P	GO:0009887	organ morphogenesis
spu-miR-2007	comp11080_c0_seq1	NOTC1_DANRE	NOTC1_DANRE Neurogenic locus notch homolog protein 1 OS=Danio rerio GN=notch1a PE=2 SV=1	144	-19.73	144	-19.73	23	2909	1812	P	GO:0048729	tissue morphogenesis
spu-miR-2007	comp11080_c0_seq1	NOTC1_DANRE	NOTC1_DANRE Neurogenic locus notch homolog protein 1 OS=Danio rerio GN=notch1a PE=2 SV=1	144	-19.73	144	-19.73	23	2909	1812	P	GO:0007166	cell surface receptor signaling pathway
spu-miR-2007	comp11080_c0_seq1	NOTC1_DANRE	NOTC1_DANRE Neurogenic locus notch homolog protein 1 OS=Danio rerio GN=notch1a PE=2 SV=1	144	-19.73	144	-19.73	23	2909	1812	C	GO:0016020	membrane
spu-miR-2007	comp11080_c0_seq1	NOTC1_DANRE	NOTC1_DANRE Neurogenic locus notch homolog protein 1 OS=Danio rerio GN=notch1a PE=2 SV=1	144	-19.73	144	-19.73	23	2909	1812	P	GO:0002376	immune system process
spu-miR-2007	comp11080_c0_seq1	NOTC1_DANRE	NOTC1_DANRE Neurogenic locus notch homolog protein 1 OS=Danio rerio GN=notch1a PE=2 SV=1	144	-19.73	144	-19.73	23	2909	1812	P	GO:0045596	negative regulation of cell differentiation
spu-miR-2007	comp11080_c0_seq1	NOTC1_DANRE	NOTC1_DANRE Neurogenic locus notch homolog protein 1 OS=Danio rerio GN=notch1a PE=2 SV=1	144	-19.73	144	-19.73	23	2909	1812	P	GO:0045597	positive regulation of cell differentiation
spu-miR-2007	comp11080_c0_seq1	NOTC1_DANRE	NOTC1_DANRE Neurogenic locus notch homolog protein 1 OS=Danio rerio GN=notch1a PE=2 SV=1	144	-19.73	144	-19.73	23	2909	1812	P	GO:0030182	neuron differentiation
spu-miR-2007	comp11080_c0_seq1	NOTC1_DANRE	NOTC1_DANRE Neurogenic locus notch homolog protein 1 OS=Danio rerio GN=notch1a PE=2 SV=1	144	-19.73	144	-19.73	23	2909	1812	P	GO:0048646	anatomical structure formation involved in morphogenesis
spu-miR-2007	comp11080_c0_seq1	NOTC1_DANRE	NOTC1_DANRE Neurogenic locus notch homolog protein 1 OS=Danio rerio GN=notch1a PE=2 SV=1	144	-19.73	144	-19.73	23	2909	1812	P	GO:0009967	positive regulation of signal transduction
spu-miR-2007	comp11080_c0_seq1	NOTC1_DANRE	NOTC1_DANRE Neurogenic locus notch homolog protein 1 OS=Danio rerio GN=notch1a PE=2 SV=1	144	-19.73	144	-19.73	23	2909	1812	P	GO:0009952	anterior/posterior pattern specification
spu-miR-2007	comp11080_c0_seq1	NOTC1_DANRE	NOTC1_DANRE Neurogenic locus notch homolog protein 1 OS=Danio rerio GN=notch1a PE=2 SV=1	144	-19.73	144	-19.73	23	2909	1812	P	GO:0043009	chordate embryonic development
spu-miR-2007	comp11080_c0_seq1	NOTC1_DANRE	NOTC1_DANRE Neurogenic locus notch homolog protein 1 OS=Danio rerio GN=notch1a PE=2 SV=1	144	-19.73	144	-19.73	23	2909	1812	P	GO:0022603	regulation of anatomical structure morphogenesis
spu-miR-2007	comp11080_c0_seq1	NOTC1_DANRE	NOTC1_DANRE Neurogenic locus notch homolog protein 1 OS=Danio rerio GN=notch1a PE=2 SV=1	144	-19.73	144	-19.73	23	2909	1812	P	GO:0045165	cell fate commitment
spu-miR-2007	comp11080_c0_seq1	NOTC1_DANRE	NOTC1_DANRE Neurogenic locus notch homolog protein 1 OS=Danio rerio GN=notch1a PE=2 SV=1	144	-19.73	144	-19.73	23	2909	1812	P	GO:0048598	embryonic morphogenesis
spu-miR-2007	comp11080_c0_seq1	NOTC1_DANRE	NOTC1_DANRE Neurogenic locus notch homolog protein 1 OS=Danio rerio GN=notch1a PE=2 SV=1	144	-19.73	144	-19.73	23	2909	1812	P	GO:0006355	regulation of transcription, DNA-dependent
spu-miR-2007	comp11080_c0_seq1	NOTC1_DANRE	NOTC1_DANRE Neurogenic locus notch homolog protein 1 OS=Danio rerio GN=notch1a PE=2 SV=1	144	-19.73	144	-19.73	23	2909	1812	P	GO:0042063	gliogenesis
spu-miR-2007	comp11080_c0_seq1	NOTC1_DANRE	NOTC1_DANRE Neurogenic locus notch homolog protein 1 OS=Danio rerio GN=notch1a PE=2 SV=1	144	-19.73	144	-19.73	23	2909	1812	P	GO:0007417	central nervous system development
spu-miR-2007	comp11080_c0_seq1	NOTC1_DANRE	NOTC1_DANRE Neurogenic locus notch homolog protein 1 OS=Danio rerio GN=notch1a PE=2 SV=1	144	-19.73	144	-19.73	23	2909	1812	P	GO:0060429	epithelium development
spu-miR-4847	comp11080_c0_seq1	NOTC1_DANRE	NOTC1_DANRE Neurogenic locus notch homolog protein 1 OS=Danio rerio GN=notch1a PE=2 SV=1	605	-77.12	158	-21.22	22	2909	2666 846 711 460	P	GO:0042127	regulation of cell proliferation
spu-miR-4847	comp11080_c0_seq1	NOTC1_DANRE	NOTC1_DANRE Neurogenic locus notch homolog protein 1 OS=Danio rerio GN=notch1a PE=2 SV=1	605	-77.12	158	-21.22	22	2909	2666 846 711 460	F	GO:0005488	binding
spu-miR-4847	comp11080_c0_seq1	NOTC1_DANRE	NOTC1_DANRE Neurogenic locus notch homolog protein 1 OS=Danio rerio GN=notch1a PE=2 SV=1	605	-77.12	158	-21.22	22	2909	2666 846 711 460	P	GO:0042981	regulation of apoptotic process
spu-miR-4847	comp11080_c0_seq1	NOTC1_DANRE	NOTC1_DANRE Neurogenic locus notch homolog protein 1 OS=Danio rerio GN=notch1a PE=2 SV=1	605	-77.12	158	-21.22	22	2909	2666 846 711 460	C	GO:0044444	cytoplasmic part
spu-miR-4847	comp11080_c0_seq1	NOTC1_DANRE	NOTC1_DANRE Neurogenic locus notch homolog protein 1 OS=Danio rerio GN=notch1a PE=2 SV=1	605	-77.12	158	-21.22	22	2909	2666 846 711 460	P	GO:0050767	regulation of neurogenesis
spu-miR-4847	comp11080_c0_seq1	NOTC1_DANRE	NOTC1_DANRE Neurogenic locus notch homolog protein 1 OS=Danio rerio GN=notch1a PE=2 SV=1	605	-77.12	158	-21.22	22	2909	2666 846 711 460	P	GO:0072358	cardiovascular system development
spu-miR-4847	comp11080_c0_seq1	NOTC1_DANRE	NOTC1_DANRE Neurogenic locus notch homolog protein 1 OS=Danio rerio GN=notch1a PE=2 SV=1	605	-77.12	158	-21.22	22	2909	2666 846 711 460	P	GO:0040007	growth
spu-miR-4847	comp11080_c0_seq1	NOTC1_DANRE	NOTC1_DANRE Neurogenic locus notch homolog protein 1 OS=Danio rerio GN=notch1a PE=2 SV=1	605	-77.12	158	-21.22	22	2909	2666 846 711 460	P	GO:0016043	cellular component organization
spu-miR-4847	comp11080_c0_seq1	NOTC1_DANRE	NOTC1_DANRE Neurogenic locus notch homolog protein 1 OS=Danio rerio GN=notch1a PE=2 SV=1	605	-77.12	158	-21.22	22	2909	2666 846 711 460	C	GO:0043231	intracellular membrane-bounded organelle
spu-miR-4847	comp11080_c0_seq1	NOTC1_DANRE	NOTC1_DANRE Neurogenic locus notch homolog protein 1 OS=Danio rerio GN=notch1a PE=2 SV=1	605	-77.12	158	-21.22	22	2909	2666 846 711 460	P	GO:0009887	organ morphogenesis
spu-miR-4847	comp11080_c0_seq1	NOTC1_DANRE	NOTC1_DANRE Neurogenic locus notch homolog protein 1 OS=Danio rerio GN=notch1a PE=2 SV=1	605	-77.12	158	-21.22	22	2909	2666 846 711 460	P	GO:0048729	tissue morphogenesis
spu-miR-4847	comp11080_c0_seq1	NOTC1_DANRE	NOTC1_DANRE Neurogenic locus notch homolog protein 1 OS=Danio rerio GN=notch1a PE=2 SV=1	605	-77.12	158	-21.22	22	2909	2666 846 711 460	P	GO:0007166	cell surface receptor signaling pathway
spu-miR-4847	comp11080_c0_seq1	NOTC1_DANRE	NOTC1_DANRE Neurogenic locus notch homolog protein 1 OS=Danio rerio GN=notch1a PE=2 SV=1	605	-77.12	158	-21.22	22	2909	2666 846 711 460	C	GO:0016020	membrane
spu-miR-4847	comp11080_c0_seq1	NOTC1_DANRE	NOTC1_DANRE Neurogenic locus notch homolog protein 1 OS=Danio rerio GN=notch1a PE=2 SV=1	605	-77.12	158	-21.22	22	2909	2666 846 711 460	P	GO:0002376	immune system process
spu-miR-4847	comp11080_c0_seq1	NOTC1_DANRE	NOTC1_DANRE Neurogenic locus notch homolog protein 1 OS=Danio rerio GN=notch1a PE=2 SV=1	605	-77.12	158	-21.22	22	2909	2666 846 711 460	P	GO:0045596	negative regulation of cell differentiation
spu-miR-4847	comp11080_c0_seq1	NOTC1_DANRE	NOTC1_DANRE Neurogenic locus notch homolog protein 1 OS=Danio rerio GN=notch1a PE=2 SV=1	605	-77.12	158	-21.22	22	2909	2666 846 711 460	P	GO:0045597	positive regulation of cell differentiation
spu-miR-4847	comp11080_c0_seq1	NOTC1_DANRE	NOTC1_DANRE Neurogenic locus notch homolog protein 1 OS=Danio rerio GN=notch1a PE=2 SV=1	605	-77.12	158	-21.22	22	2909	2666 846 711 460	P	GO:0030182	neuron differentiation
spu-miR-4847	comp11080_c0_seq1	NOTC1_DANRE	NOTC1_DANRE Neurogenic locus notch homolog protein 1 OS=Danio rerio GN=notch1a PE=2 SV=1	605	-77.12	158	-21.22	22	2909	2666 846 711 460	P	GO:0048646	anatomical structure formation involved in morphogenesis
spu-miR-4847	comp11080_c0_seq1	NOTC1_DANRE	NOTC1_DANRE Neurogenic locus notch homolog protein 1 OS=Danio rerio GN=notch1a PE=2 SV=1	605	-77.12	158	-21.22	22	2909	2666 846 711 460	P	GO:0009967	positive regulation of signal transduction
spu-miR-4847	comp11080_c0_seq1	NOTC1_DANRE	NOTC1_DANRE Neurogenic locus notch homolog protein 1 OS=Danio rerio GN=notch1a PE=2 SV=1	605	-77.12	158	-21.22	22	2909	2666 846 711 460	P	GO:0009952	anterior/posterior pattern specification
spu-miR-4847	comp11080_c0_seq1	NOTC1_DANRE	NOTC1_DANRE Neurogenic locus notch homolog protein 1 OS=Danio rerio GN=notch1a PE=2 SV=1	605	-77.12	158	-21.22	22	2909	2666 846 711 460	P	GO:0043009	chordate embryonic development
spu-miR-4847	comp11080_c0_seq1	NOTC1_DANRE	NOTC1_DANRE Neurogenic locus notch homolog protein 1 OS=Danio rerio GN=notch1a PE=2 SV=1	605	-77.12	158	-21.22	22	2909	2666 846 711 460	P	GO:0022603	regulation of anatomical structure morphogenesis
spu-miR-4847	comp11080_c0_seq1	NOTC1_DANRE	NOTC1_DANRE Neurogenic locus notch homolog protein 1 OS=Danio rerio GN=notch1a PE=2 SV=1	605	-77.12	158	-21.22	22	2909	2666 846 711 460	P	GO:0045165	cell fate commitment
spu-miR-4847	comp11080_c0_seq1	NOTC1_DANRE	NOTC1_DANRE Neurogenic locus notch homolog protein 1 OS=Danio rerio GN=notch1a PE=2 SV=1	605	-77.12	158	-21.22	22	2909	2666 846 711 460	P	GO:0048598	embryonic morphogenesis
spu-miR-4847	comp11080_c0_seq1	NOTC1_DANRE	NOTC1_DANRE Neurogenic locus notch homolog protein 1 OS=Danio rerio GN=notch1a PE=2 SV=1	605	-77.12	158	-21.22	22	2909	2666 846 711 460	P	GO:0006355	regulation of transcription, DNA-dependent
spu-miR-4847	comp11080_c0_seq1	NOTC1_DANRE	NOTC1_DANRE Neurogenic locus notch homolog protein 1 OS=Danio rerio GN=notch1a PE=2 SV=1	605	-77.12	158	-21.22	22	2909	2666 846 711 460	P	GO:0042063	gliogenesis
spu-miR-4847	comp11080_c0_seq1	NOTC1_DANRE	NOTC1_DANRE Neurogenic locus notch homolog protein 1 OS=Danio rerio GN=notch1a PE=2 SV=1	605	-77.12	158	-21.22	22	2909	2666 846 711 460	P	GO:0007417	central nervous system development
spu-miR-4847	comp11080_c0_seq1	NOTC1_DANRE	NOTC1_DANRE Neurogenic locus notch homolog protein 1 OS=Danio rerio GN=notch1a PE=2 SV=1	605	-77.12	158	-21.22	22	2909	2666 846 711 460	P	GO:0060429	epithelium development
spu-miR-200	comp11080_c0_seq1	NOTC1_DANRE	NOTC1_DANRE Neurogenic locus notch homolog protein 1 OS=Danio rerio GN=notch1a PE=2 SV=1	155	-17.21	155	-17.21	23	2909	2157	P	GO:0042127	regulation of cell proliferation
spu-miR-200	comp11080_c0_seq1	NOTC1_DANRE	NOTC1_DANRE Neurogenic locus notch homolog protein 1 OS=Danio rerio GN=notch1a PE=2 SV=1	155	-17.21	155	-17.21	23	2909	2157	F	GO:0005488	binding
spu-miR-200	comp11080_c0_seq1	NOTC1_DANRE	NOTC1_DANRE Neurogenic locus notch homolog protein 1 OS=Danio rerio GN=notch1a PE=2 SV=1	155	-17.21	155	-17.21	23	2909	2157	P	GO:0042981	regulation of apoptotic process
spu-miR-200	comp11080_c0_seq1	NOTC1_DANRE	NOTC1_DANRE Neurogenic locus notch homolog protein 1 OS=Danio rerio GN=notch1a PE=2 SV=1	155	-17.21	155	-17.21	23	2909	2157	C	GO:0044444	cytoplasmic part
spu-miR-200	comp11080_c0_seq1	NOTC1_DANRE	NOTC1_DANRE Neurogenic locus notch homolog protein 1 OS=Danio rerio GN=notch1a PE=2 SV=1	155	-17.21	155	-17.21	23	2909	2157	P	GO:0050767	regulation of neurogenesis
spu-miR-200	comp11080_c0_seq1	NOTC1_DANRE	NOTC1_DANRE Neurogenic locus notch homolog protein 1 OS=Danio rerio GN=notch1a PE=2 SV=1	155	-17.21	155	-17.21	23	2909	2157	P	GO:0072358	cardiovascular system development
spu-miR-200	comp11080_c0_seq1	NOTC1_DANRE	NOTC1_DANRE Neurogenic locus notch homolog protein 1 OS=Danio rerio GN=notch1a PE=2 SV=1	155	-17.21	155	-17.21	23	2909	2157	P	GO:0040007	growth
spu-miR-200	comp11080_c0_seq1	NOTC1_DANRE	NOTC1_DANRE Neurogenic locus notch homolog protein 1 OS=Danio rerio GN=notch1a PE=2 SV=1	155	-17.21	155	-17.21	23	2909	2157	P	GO:0016043	cellular component organization
spu-miR-200	comp11080_c0_seq1	NOTC1_DANRE	NOTC1_DANRE Neurogenic locus notch homolog protein 1 OS=Danio rerio GN=notch1a PE=2 SV=1	155	-17.21	155	-17.21	23	2909	2157	C	GO:0043231	intracellular membrane-bounded organelle
spu-miR-200	comp11080_c0_seq1	NOTC1_DANRE	NOTC1_DANRE Neurogenic locus notch homolog protein 1 OS=Danio rerio GN=notch1a PE=2 SV=1	155	-17.21	155	-17.21	23	2909	2157	P	GO:0009887	organ morphogenesis
spu-miR-200	comp11080_c0_seq1	NOTC1_DANRE	NOTC1_DANRE Neurogenic locus notch homolog protein 1 OS=Danio rerio GN=notch1a PE=2 SV=1	155	-17.21	155	-17.21	23	2909	2157	P	GO:0048729	tissue morphogenesis
spu-miR-200	comp11080_c0_seq1	NOTC1_DANRE	NOTC1_DANRE Neurogenic locus notch homolog protein 1 OS=Danio rerio GN=notch1a PE=2 SV=1	155	-17.21	155	-17.21	23	2909	2157	P	GO:0007166	cell surface receptor signaling pathway
spu-miR-200	comp11080_c0_seq1	NOTC1_DANRE	NOTC1_DANRE Neurogenic locus notch homolog protein 1 OS=Danio rerio GN=notch1a PE=2 SV=1	155	-17.21	155	-17.21	23	2909	2157	C	GO:0016020	membrane
spu-miR-200	comp11080_c0_seq1	NOTC1_DANRE	NOTC1_DANRE Neurogenic locus notch homolog protein 1 OS=Danio rerio GN=notch1a PE=2 SV=1	155	-17.21	155	-17.21	23	2909	2157	P	GO:0002376	immune system process
spu-miR-200	comp11080_c0_seq1	NOTC1_DANRE	NOTC1_DANRE Neurogenic locus notch homolog protein 1 OS=Danio rerio GN=notch1a PE=2 SV=1	155	-17.21	155	-17.21	23	2909	2157	P	GO:0045596	negative regulation of cell differentiation
spu-miR-200	comp11080_c0_seq1	NOTC1_DANRE	NOTC1_DANRE Neurogenic locus notch homolog protein 1 OS=Danio rerio GN=notch1a PE=2 SV=1	155	-17.21	155	-17.21	23	2909	2157	P	GO:0045597	positive regulation of cell differentiation
spu-miR-200	comp11080_c0_seq1	NOTC1_DANRE	NOTC1_DANRE Neurogenic locus notch homolog protein 1 OS=Danio rerio GN=notch1a PE=2 SV=1	155	-17.21	155	-17.21	23	2909	2157	P	GO:0030182	neuron differentiation
spu-miR-200	comp11080_c0_seq1	NOTC1_DANRE	NOTC1_DANRE Neurogenic locus notch homolog protein 1 OS=Danio rerio GN=notch1a PE=2 SV=1	155	-17.21	155	-17.21	23	2909	2157	P	GO:0048646	anatomical structure formation involved in morphogenesis
spu-miR-200	comp11080_c0_seq1	NOTC1_DANRE	NOTC1_DANRE Neurogenic locus notch homolog protein 1 OS=Danio rerio GN=notch1a PE=2 SV=1	155	-17.21	155	-17.21	23	2909	2157	P	GO:0009967	positive regulation of signal transduction
spu-miR-200	comp11080_c0_seq1	NOTC1_DANRE	NOTC1_DANRE Neurogenic locus notch homolog protein 1 OS=Danio rerio GN=notch1a PE=2 SV=1	155	-17.21	155	-17.21	23	2909	2157	P	GO:0009952	anterior/posterior pattern specification
spu-miR-200	comp11080_c0_seq1	NOTC1_DANRE	NOTC1_DANRE Neurogenic locus notch homolog protein 1 OS=Danio rerio GN=notch1a PE=2 SV=1	155	-17.21	155	-17.21	23	2909	2157	P	GO:0043009	chordate embryonic development
spu-miR-200	comp11080_c0_seq1	NOTC1_DANRE	NOTC1_DANRE Neurogenic locus notch homolog protein 1 OS=Danio rerio GN=notch1a PE=2 SV=1	155	-17.21	155	-17.21	23	2909	2157	P	GO:0022603	regulation of anatomical structure morphogenesis
spu-miR-200	comp11080_c0_seq1	NOTC1_DANRE	NOTC1_DANRE Neurogenic locus notch homolog protein 1 OS=Danio rerio GN=notch1a PE=2 SV=1	155	-17.21	155	-17.21	23	2909	2157	P	GO:0045165	cell fate commitment
spu-miR-200	comp11080_c0_seq1	NOTC1_DANRE	NOTC1_DANRE Neurogenic locus notch homolog protein 1 OS=Danio rerio GN=notch1a PE=2 SV=1	155	-17.21	155	-17.21	23	2909	2157	P	GO:0048598	embryonic morphogenesis
spu-miR-200	comp11080_c0_seq1	NOTC1_DANRE	NOTC1_DANRE Neurogenic locus notch homolog protein 1 OS=Danio rerio GN=notch1a PE=2 SV=1	155	-17.21	155	-17.21	23	2909	2157	P	GO:0006355	regulation of transcription, DNA-dependent
spu-miR-200	comp11080_c0_seq1	NOTC1_DANRE	NOTC1_DANRE Neurogenic locus notch homolog protein 1 OS=Danio rerio GN=notch1a PE=2 SV=1	155	-17.21	155	-17.21	23	2909	2157	P	GO:0042063	gliogenesis
spu-miR-200	comp11080_c0_seq1	NOTC1_DANRE	NOTC1_DANRE Neurogenic locus notch homolog protein 1 OS=Danio rerio GN=notch1a PE=2 SV=1	155	-17.21	155	-17.21	23	2909	2157	P	GO:0007417	central nervous system development
spu-miR-200	comp11080_c0_seq1	NOTC1_DANRE	NOTC1_DANRE Neurogenic locus notch homolog protein 1 OS=Danio rerio GN=notch1a PE=2 SV=1	155	-17.21	155	-17.21	23	2909	2157	P	GO:0060429	epithelium development
spu-miR-4849	comp11080_c0_seq1	NOTC1_DANRE	NOTC1_DANRE Neurogenic locus notch homolog protein 1 OS=Danio rerio GN=notch1a PE=2 SV=1	437	-51.39	153	-19.78	24	2909	1754 1445 1983	P	GO:0042127	regulation of cell proliferation
spu-miR-4849	comp11080_c0_seq1	NOTC1_DANRE	NOTC1_DANRE Neurogenic locus notch homolog protein 1 OS=Danio rerio GN=notch1a PE=2 SV=1	437	-51.39	153	-19.78	24	2909	1754 1445 1983	F	GO:0005488	binding
spu-miR-4849	comp11080_c0_seq1	NOTC1_DANRE	NOTC1_DANRE Neurogenic locus notch homolog protein 1 OS=Danio rerio GN=notch1a PE=2 SV=1	437	-51.39	153	-19.78	24	2909	1754 1445 1983	P	GO:0042981	regulation of apoptotic process
spu-miR-4849	comp11080_c0_seq1	NOTC1_DANRE	NOTC1_DANRE Neurogenic locus notch homolog protein 1 OS=Danio rerio GN=notch1a PE=2 SV=1	437	-51.39	153	-19.78	24	2909	1754 1445 1983	C	GO:0044444	cytoplasmic part
spu-miR-4849	comp11080_c0_seq1	NOTC1_DANRE	NOTC1_DANRE Neurogenic locus notch homolog protein 1 OS=Danio rerio GN=notch1a PE=2 SV=1	437	-51.39	153	-19.78	24	2909	1754 1445 1983	P	GO:0050767	regulation of neurogenesis
spu-miR-4849	comp11080_c0_seq1	NOTC1_DANRE	NOTC1_DANRE Neurogenic locus notch homolog protein 1 OS=Danio rerio GN=notch1a PE=2 SV=1	437	-51.39	153	-19.78	24	2909	1754 1445 1983	P	GO:0072358	cardiovascular system development
spu-miR-4849	comp11080_c0_seq1	NOTC1_DANRE	NOTC1_DANRE Neurogenic locus notch homolog protein 1 OS=Danio rerio GN=notch1a PE=2 SV=1	437	-51.39	153	-19.78	24	2909	1754 1445 1983	P	GO:0040007	growth
spu-miR-4849	comp11080_c0_seq1	NOTC1_DANRE	NOTC1_DANRE Neurogenic locus notch homolog protein 1 OS=Danio rerio GN=notch1a PE=2 SV=1	437	-51.39	153	-19.78	24	2909	1754 1445 1983	P	GO:0016043	cellular component organization
spu-miR-4849	comp11080_c0_seq1	NOTC1_DANRE	NOTC1_DANRE Neurogenic locus notch homolog protein 1 OS=Danio rerio GN=notch1a PE=2 SV=1	437	-51.39	153	-19.78	24	2909	1754 1445 1983	C	GO:0043231	intracellular membrane-bounded organelle
spu-miR-4849	comp11080_c0_seq1	NOTC1_DANRE	NOTC1_DANRE Neurogenic locus notch homolog protein 1 OS=Danio rerio GN=notch1a PE=2 SV=1	437	-51.39	153	-19.78	24	2909	1754 1445 1983	P	GO:0009887	organ morphogenesis
spu-miR-4849	comp11080_c0_seq1	NOTC1_DANRE	NOTC1_DANRE Neurogenic locus notch homolog protein 1 OS=Danio rerio GN=notch1a PE=2 SV=1	437	-51.39	153	-19.78	24	2909	1754 1445 1983	P	GO:0048729	tissue morphogenesis
spu-miR-4849	comp11080_c0_seq1	NOTC1_DANRE	NOTC1_DANRE Neurogenic locus notch homolog protein 1 OS=Danio rerio GN=notch1a PE=2 SV=1	437	-51.39	153	-19.78	24	2909	1754 1445 1983	P	GO:0007166	cell surface receptor signaling pathway
spu-miR-4849	comp11080_c0_seq1	NOTC1_DANRE	NOTC1_DANRE Neurogenic locus notch homolog protein 1 OS=Danio rerio GN=notch1a PE=2 SV=1	437	-51.39	153	-19.78	24	2909	1754 1445 1983	C	GO:0016020	membrane
spu-miR-4849	comp11080_c0_seq1	NOTC1_DANRE	NOTC1_DANRE Neurogenic locus notch homolog protein 1 OS=Danio rerio GN=notch1a PE=2 SV=1	437	-51.39	153	-19.78	24	2909	1754 1445 1983	P	GO:0002376	immune system process
spu-miR-4849	comp11080_c0_seq1	NOTC1_DANRE	NOTC1_DANRE Neurogenic locus notch homolog protein 1 OS=Danio rerio GN=notch1a PE=2 SV=1	437	-51.39	153	-19.78	24	2909	1754 1445 1983	P	GO:0045596	negative regulation of cell differentiation
spu-miR-4849	comp11080_c0_seq1	NOTC1_DANRE	NOTC1_DANRE Neurogenic locus notch homolog protein 1 OS=Danio rerio GN=notch1a PE=2 SV=1	437	-51.39	153	-19.78	24	2909	1754 1445 1983	P	GO:0045597	positive regulation of cell differentiation
spu-miR-4849	comp11080_c0_seq1	NOTC1_DANRE	NOTC1_DANRE Neurogenic locus notch homolog protein 1 OS=Danio rerio GN=notch1a PE=2 SV=1	437	-51.39	153	-19.78	24	2909	1754 1445 1983	P	GO:0030182	neuron differentiation
spu-miR-4849	comp11080_c0_seq1	NOTC1_DANRE	NOTC1_DANRE Neurogenic locus notch homolog protein 1 OS=Danio rerio GN=notch1a PE=2 SV=1	437	-51.39	153	-19.78	24	2909	1754 1445 1983	P	GO:0048646	anatomical structure formation involved in morphogenesis
spu-miR-4849	comp11080_c0_seq1	NOTC1_DANRE	NOTC1_DANRE Neurogenic locus notch homolog protein 1 OS=Danio rerio GN=notch1a PE=2 SV=1	437	-51.39	153	-19.78	24	2909	1754 1445 1983	P	GO:0009967	positive regulation of signal transduction
spu-miR-4849	comp11080_c0_seq1	NOTC1_DANRE	NOTC1_DANRE Neurogenic locus notch homolog protein 1 OS=Danio rerio GN=notch1a PE=2 SV=1	437	-51.39	153	-19.78	24	2909	1754 1445 1983	P	GO:0009952	anterior/posterior pattern specification
spu-miR-4849	comp11080_c0_seq1	NOTC1_DANRE	NOTC1_DANRE Neurogenic locus notch homolog protein 1 OS=Danio rerio GN=notch1a PE=2 SV=1	437	-51.39	153	-19.78	24	2909	1754 1445 1983	P	GO:0043009	chordate embryonic development
spu-miR-4849	comp11080_c0_seq1	NOTC1_DANRE	NOTC1_DANRE Neurogenic locus notch homolog protein 1 OS=Danio rerio GN=notch1a PE=2 SV=1	437	-51.39	153	-19.78	24	2909	1754 1445 1983	P	GO:0022603	regulation of anatomical structure morphogenesis
spu-miR-4849	comp11080_c0_seq1	NOTC1_DANRE	NOTC1_DANRE Neurogenic locus notch homolog protein 1 OS=Danio rerio GN=notch1a PE=2 SV=1	437	-51.39	153	-19.78	24	2909	1754 1445 1983	P	GO:0045165	cell fate commitment
spu-miR-4849	comp11080_c0_seq1	NOTC1_DANRE	NOTC1_DANRE Neurogenic locus notch homolog protein 1 OS=Danio rerio GN=notch1a PE=2 SV=1	437	-51.39	153	-19.78	24	2909	1754 1445 1983	P	GO:0048598	embryonic morphogenesis
spu-miR-4849	comp11080_c0_seq1	NOTC1_DANRE	NOTC1_DANRE Neurogenic locus notch homolog protein 1 OS=Danio rerio GN=notch1a PE=2 SV=1	437	-51.39	153	-19.78	24	2909	1754 1445 1983	P	GO:0006355	regulation of transcription, DNA-dependent
spu-miR-4849	comp11080_c0_seq1	NOTC1_DANRE	NOTC1_DANRE Neurogenic locus notch homolog protein 1 OS=Danio rerio GN=notch1a PE=2 SV=1	437	-51.39	153	-19.78	24	2909	1754 1445 1983	P	GO:0042063	gliogenesis
spu-miR-4849	comp11080_c0_seq1	NOTC1_DANRE	NOTC1_DANRE Neurogenic locus notch homolog protein 1 OS=Danio rerio GN=notch1a PE=2 SV=1	437	-51.39	153	-19.78	24	2909	1754 1445 1983	P	GO:0007417	central nervous system development
spu-miR-4849	comp11080_c0_seq1	NOTC1_DANRE	NOTC1_DANRE Neurogenic locus notch homolog protein 1 OS=Danio rerio GN=notch1a PE=2 SV=1	437	-51.39	153	-19.78	24	2909	1754 1445 1983	P	GO:0060429	epithelium development
spu-miR-4854	comp11080_c0_seq1	NOTC1_DANRE	NOTC1_DANRE Neurogenic locus notch homolog protein 1 OS=Danio rerio GN=notch1a PE=2 SV=1	148	-24.25	148	-24.25	22	2909	2082	P	GO:0042127	regulation of cell proliferation
spu-miR-4854	comp11080_c0_seq1	NOTC1_DANRE	NOTC1_DANRE Neurogenic locus notch homolog protein 1 OS=Danio rerio GN=notch1a PE=2 SV=1	148	-24.25	148	-24.25	22	2909	2082	F	GO:0005488	binding
spu-miR-4854	comp11080_c0_seq1	NOTC1_DANRE	NOTC1_DANRE Neurogenic locus notch homolog protein 1 OS=Danio rerio GN=notch1a PE=2 SV=1	148	-24.25	148	-24.25	22	2909	2082	P	GO:0042981	regulation of apoptotic process
spu-miR-4854	comp11080_c0_seq1	NOTC1_DANRE	NOTC1_DANRE Neurogenic locus notch homolog protein 1 OS=Danio rerio GN=notch1a PE=2 SV=1	148	-24.25	148	-24.25	22	2909	2082	C	GO:0044444	cytoplasmic part
spu-miR-4854	comp11080_c0_seq1	NOTC1_DANRE	NOTC1_DANRE Neurogenic locus notch homolog protein 1 OS=Danio rerio GN=notch1a PE=2 SV=1	148	-24.25	148	-24.25	22	2909	2082	P	GO:0050767	regulation of neurogenesis
spu-miR-4854	comp11080_c0_seq1	NOTC1_DANRE	NOTC1_DANRE Neurogenic locus notch homolog protein 1 OS=Danio rerio GN=notch1a PE=2 SV=1	148	-24.25	148	-24.25	22	2909	2082	P	GO:0072358	cardiovascular system development
spu-miR-4854	comp11080_c0_seq1	NOTC1_DANRE	NOTC1_DANRE Neurogenic locus notch homolog protein 1 OS=Danio rerio GN=notch1a PE=2 SV=1	148	-24.25	148	-24.25	22	2909	2082	P	GO:0040007	growth
spu-miR-4854	comp11080_c0_seq1	NOTC1_DANRE	NOTC1_DANRE Neurogenic locus notch homolog protein 1 OS=Danio rerio GN=notch1a PE=2 SV=1	148	-24.25	148	-24.25	22	2909	2082	P	GO:0016043	cellular component organization
spu-miR-4854	comp11080_c0_seq1	NOTC1_DANRE	NOTC1_DANRE Neurogenic locus notch homolog protein 1 OS=Danio rerio GN=notch1a PE=2 SV=1	148	-24.25	148	-24.25	22	2909	2082	C	GO:0043231	intracellular membrane-bounded organelle
spu-miR-4854	comp11080_c0_seq1	NOTC1_DANRE	NOTC1_DANRE Neurogenic locus notch homolog protein 1 OS=Danio rerio GN=notch1a PE=2 SV=1	148	-24.25	148	-24.25	22	2909	2082	P	GO:0009887	organ morphogenesis
spu-miR-4854	comp11080_c0_seq1	NOTC1_DANRE	NOTC1_DANRE Neurogenic locus notch homolog protein 1 OS=Danio rerio GN=notch1a PE=2 SV=1	148	-24.25	148	-24.25	22	2909	2082	P	GO:0048729	tissue morphogenesis
spu-miR-4854	comp11080_c0_seq1	NOTC1_DANRE	NOTC1_DANRE Neurogenic locus notch homolog protein 1 OS=Danio rerio GN=notch1a PE=2 SV=1	148	-24.25	148	-24.25	22	2909	2082	P	GO:0007166	cell surface receptor signaling pathway
spu-miR-4854	comp11080_c0_seq1	NOTC1_DANRE	NOTC1_DANRE Neurogenic locus notch homolog protein 1 OS=Danio rerio GN=notch1a PE=2 SV=1	148	-24.25	148	-24.25	22	2909	2082	C	GO:0016020	membrane
spu-miR-4854	comp11080_c0_seq1	NOTC1_DANRE	NOTC1_DANRE Neurogenic locus notch homolog protein 1 OS=Danio rerio GN=notch1a PE=2 SV=1	148	-24.25	148	-24.25	22	2909	2082	P	GO:0002376	immune system process
spu-miR-4854	comp11080_c0_seq1	NOTC1_DANRE	NOTC1_DANRE Neurogenic locus notch homolog protein 1 OS=Danio rerio GN=notch1a PE=2 SV=1	148	-24.25	148	-24.25	22	2909	2082	P	GO:0045596	negative regulation of cell differentiation
spu-miR-4854	comp11080_c0_seq1	NOTC1_DANRE	NOTC1_DANRE Neurogenic locus notch homolog protein 1 OS=Danio rerio GN=notch1a PE=2 SV=1	148	-24.25	148	-24.25	22	2909	2082	P	GO:0045597	positive regulation of cell differentiation
spu-miR-4854	comp11080_c0_seq1	NOTC1_DANRE	NOTC1_DANRE Neurogenic locus notch homolog protein 1 OS=Danio rerio GN=notch1a PE=2 SV=1	148	-24.25	148	-24.25	22	2909	2082	P	GO:0030182	neuron differentiation
spu-miR-4854	comp11080_c0_seq1	NOTC1_DANRE	NOTC1_DANRE Neurogenic locus notch homolog protein 1 OS=Danio rerio GN=notch1a PE=2 SV=1	148	-24.25	148	-24.25	22	2909	2082	P	GO:0048646	anatomical structure formation involved in morphogenesis
spu-miR-4854	comp11080_c0_seq1	NOTC1_DANRE	NOTC1_DANRE Neurogenic locus notch homolog protein 1 OS=Danio rerio GN=notch1a PE=2 SV=1	148	-24.25	148	-24.25	22	2909	2082	P	GO:0009967	positive regulation of signal transduction
spu-miR-4854	comp11080_c0_seq1	NOTC1_DANRE	NOTC1_DANRE Neurogenic locus notch homolog protein 1 OS=Danio rerio GN=notch1a PE=2 SV=1	148	-24.25	148	-24.25	22	2909	2082	P	GO:0009952	anterior/posterior pattern specification
spu-miR-4854	comp11080_c0_seq1	NOTC1_DANRE	NOTC1_DANRE Neurogenic locus notch homolog protein 1 OS=Danio rerio GN=notch1a PE=2 SV=1	148	-24.25	148	-24.25	22	2909	2082	P	GO:0043009	chordate embryonic development
spu-miR-4854	comp11080_c0_seq1	NOTC1_DANRE	NOTC1_DANRE Neurogenic locus notch homolog protein 1 OS=Danio rerio GN=notch1a PE=2 SV=1	148	-24.25	148	-24.25	22	2909	2082	P	GO:0022603	regulation of anatomical structure morphogenesis
spu-miR-4854	comp11080_c0_seq1	NOTC1_DANRE	NOTC1_DANRE Neurogenic locus notch homolog protein 1 OS=Danio rerio GN=notch1a PE=2 SV=1	148	-24.25	148	-24.25	22	2909	2082	P	GO:0045165	cell fate commitment
spu-miR-4854	comp11080_c0_seq1	NOTC1_DANRE	NOTC1_DANRE Neurogenic locus notch homolog protein 1 OS=Danio rerio GN=notch1a PE=2 SV=1	148	-24.25	148	-24.25	22	2909	2082	P	GO:0048598	embryonic morphogenesis
spu-miR-4854	comp11080_c0_seq1	NOTC1_DANRE	NOTC1_DANRE Neurogenic locus notch homolog protein 1 OS=Danio rerio GN=notch1a PE=2 SV=1	148	-24.25	148	-24.25	22	2909	2082	P	GO:0006355	regulation of transcription, DNA-dependent
spu-miR-4854	comp11080_c0_seq1	NOTC1_DANRE	NOTC1_DANRE Neurogenic locus notch homolog protein 1 OS=Danio rerio GN=notch1a PE=2 SV=1	148	-24.25	148	-24.25	22	2909	2082	P	GO:0042063	gliogenesis
spu-miR-4854	comp11080_c0_seq1	NOTC1_DANRE	NOTC1_DANRE Neurogenic locus notch homolog protein 1 OS=Danio rerio GN=notch1a PE=2 SV=1	148	-24.25	148	-24.25	22	2909	2082	P	GO:0007417	central nervous system development
spu-miR-4854	comp11080_c0_seq1	NOTC1_DANRE	NOTC1_DANRE Neurogenic locus notch homolog protein 1 OS=Danio rerio GN=notch1a PE=2 SV=1	148	-24.25	148	-24.25	22	2909	2082	P	GO:0060429	epithelium development
spu-miR-4855	comp11080_c0_seq1	NOTC1_DANRE	NOTC1_DANRE Neurogenic locus notch homolog protein 1 OS=Danio rerio GN=notch1a PE=2 SV=1	320	-46.66	164	-24.6	24	2909	1984 1746	P	GO:0042127	regulation of cell proliferation
spu-miR-4855	comp11080_c0_seq1	NOTC1_DANRE	NOTC1_DANRE Neurogenic locus notch homolog protein 1 OS=Danio rerio GN=notch1a PE=2 SV=1	320	-46.66	164	-24.6	24	2909	1984 1746	F	GO:0005488	binding
spu-miR-4855	comp11080_c0_seq1	NOTC1_DANRE	NOTC1_DANRE Neurogenic locus notch homolog protein 1 OS=Danio rerio GN=notch1a PE=2 SV=1	320	-46.66	164	-24.6	24	2909	1984 1746	P	GO:0042981	regulation of apoptotic process
spu-miR-4855	comp11080_c0_seq1	NOTC1_DANRE	NOTC1_DANRE Neurogenic locus notch homolog protein 1 OS=Danio rerio GN=notch1a PE=2 SV=1	320	-46.66	164	-24.6	24	2909	1984 1746	C	GO:0044444	cytoplasmic part
spu-miR-4855	comp11080_c0_seq1	NOTC1_DANRE	NOTC1_DANRE Neurogenic locus notch homolog protein 1 OS=Danio rerio GN=notch1a PE=2 SV=1	320	-46.66	164	-24.6	24	2909	1984 1746	P	GO:0050767	regulation of neurogenesis
spu-miR-4855	comp11080_c0_seq1	NOTC1_DANRE	NOTC1_DANRE Neurogenic locus notch homolog protein 1 OS=Danio rerio GN=notch1a PE=2 SV=1	320	-46.66	164	-24.6	24	2909	1984 1746	P	GO:0072358	cardiovascular system development
spu-miR-4855	comp11080_c0_seq1	NOTC1_DANRE	NOTC1_DANRE Neurogenic locus notch homolog protein 1 OS=Danio rerio GN=notch1a PE=2 SV=1	320	-46.66	164	-24.6	24	2909	1984 1746	P	GO:0040007	growth
spu-miR-4855	comp11080_c0_seq1	NOTC1_DANRE	NOTC1_DANRE Neurogenic locus notch homolog protein 1 OS=Danio rerio GN=notch1a PE=2 SV=1	320	-46.66	164	-24.6	24	2909	1984 1746	P	GO:0016043	cellular component organization
spu-miR-4855	comp11080_c0_seq1	NOTC1_DANRE	NOTC1_DANRE Neurogenic locus notch homolog protein 1 OS=Danio rerio GN=notch1a PE=2 SV=1	320	-46.66	164	-24.6	24	2909	1984 1746	C	GO:0043231	intracellular membrane-bounded organelle
spu-miR-4855	comp11080_c0_seq1	NOTC1_DANRE	NOTC1_DANRE Neurogenic locus notch homolog protein 1 OS=Danio rerio GN=notch1a PE=2 SV=1	320	-46.66	164	-24.6	24	2909	1984 1746	P	GO:0009887	organ morphogenesis
spu-miR-4855	comp11080_c0_seq1	NOTC1_DANRE	NOTC1_DANRE Neurogenic locus notch homolog protein 1 OS=Danio rerio GN=notch1a PE=2 SV=1	320	-46.66	164	-24.6	24	2909	1984 1746	P	GO:0048729	tissue morphogenesis
spu-miR-4855	comp11080_c0_seq1	NOTC1_DANRE	NOTC1_DANRE Neurogenic locus notch homolog protein 1 OS=Danio rerio GN=notch1a PE=2 SV=1	320	-46.66	164	-24.6	24	2909	1984 1746	P	GO:0007166	cell surface receptor signaling pathway
spu-miR-4855	comp11080_c0_seq1	NOTC1_DANRE	NOTC1_DANRE Neurogenic locus notch homolog protein 1 OS=Danio rerio GN=notch1a PE=2 SV=1	320	-46.66	164	-24.6	24	2909	1984 1746	C	GO:0016020	membrane
spu-miR-4855	comp11080_c0_seq1	NOTC1_DANRE	NOTC1_DANRE Neurogenic locus notch homolog protein 1 OS=Danio rerio GN=notch1a PE=2 SV=1	320	-46.66	164	-24.6	24	2909	1984 1746	P	GO:0002376	immune system process
spu-miR-4855	comp11080_c0_seq1	NOTC1_DANRE	NOTC1_DANRE Neurogenic locus notch homolog protein 1 OS=Danio rerio GN=notch1a PE=2 SV=1	320	-46.66	164	-24.6	24	2909	1984 1746	P	GO:0045596	negative regulation of cell differentiation
spu-miR-4855	comp11080_c0_seq1	NOTC1_DANRE	NOTC1_DANRE Neurogenic locus notch homolog protein 1 OS=Danio rerio GN=notch1a PE=2 SV=1	320	-46.66	164	-24.6	24	2909	1984 1746	P	GO:0045597	positive regulation of cell differentiation
spu-miR-4855	comp11080_c0_seq1	NOTC1_DANRE	NOTC1_DANRE Neurogenic locus notch homolog protein 1 OS=Danio rerio GN=notch1a PE=2 SV=1	320	-46.66	164	-24.6	24	2909	1984 1746	P	GO:0030182	neuron differentiation
spu-miR-4855	comp11080_c0_seq1	NOTC1_DANRE	NOTC1_DANRE Neurogenic locus notch homolog protein 1 OS=Danio rerio GN=notch1a PE=2 SV=1	320	-46.66	164	-24.6	24	2909	1984 1746	P	GO:0048646	anatomical structure formation involved in morphogenesis
spu-miR-4855	comp11080_c0_seq1	NOTC1_DANRE	NOTC1_DANRE Neurogenic locus notch homolog protein 1 OS=Danio rerio GN=notch1a PE=2 SV=1	320	-46.66	164	-24.6	24	2909	1984 1746	P	GO:0009967	positive regulation of signal transduction
spu-miR-4855	comp11080_c0_seq1	NOTC1_DANRE	NOTC1_DANRE Neurogenic locus notch homolog protein 1 OS=Danio rerio GN=notch1a PE=2 SV=1	320	-46.66	164	-24.6	24	2909	1984 1746	P	GO:0009952	anterior/posterior pattern specification
spu-miR-4855	comp11080_c0_seq1	NOTC1_DANRE	NOTC1_DANRE Neurogenic locus notch homolog protein 1 OS=Danio rerio GN=notch1a PE=2 SV=1	320	-46.66	164	-24.6	24	2909	1984 1746	P	GO:0043009	chordate embryonic development
spu-miR-4855	comp11080_c0_seq1	NOTC1_DANRE	NOTC1_DANRE Neurogenic locus notch homolog protein 1 OS=Danio rerio GN=notch1a PE=2 SV=1	320	-46.66	164	-24.6	24	2909	1984 1746	P	GO:0022603	regulation of anatomical structure morphogenesis
spu-miR-4855	comp11080_c0_seq1	NOTC1_DANRE	NOTC1_DANRE Neurogenic locus notch homolog protein 1 OS=Danio rerio GN=notch1a PE=2 SV=1	320	-46.66	164	-24.6	24	2909	1984 1746	P	GO:0045165	cell fate commitment
spu-miR-4855	comp11080_c0_seq1	NOTC1_DANRE	NOTC1_DANRE Neurogenic locus notch homolog protein 1 OS=Danio rerio GN=notch1a PE=2 SV=1	320	-46.66	164	-24.6	24	2909	1984 1746	P	GO:0048598	embryonic morphogenesis
spu-miR-4855	comp11080_c0_seq1	NOTC1_DANRE	NOTC1_DANRE Neurogenic locus notch homolog protein 1 OS=Danio rerio GN=notch1a PE=2 SV=1	320	-46.66	164	-24.6	24	2909	1984 1746	P	GO:0006355	regulation of transcription, DNA-dependent
spu-miR-4855	comp11080_c0_seq1	NOTC1_DANRE	NOTC1_DANRE Neurogenic locus notch homolog protein 1 OS=Danio rerio GN=notch1a PE=2 SV=1	320	-46.66	164	-24.6	24	2909	1984 1746	P	GO:0042063	gliogenesis
spu-miR-4855	comp11080_c0_seq1	NOTC1_DANRE	NOTC1_DANRE Neurogenic locus notch homolog protein 1 OS=Danio rerio GN=notch1a PE=2 SV=1	320	-46.66	164	-24.6	24	2909	1984 1746	P	GO:0007417	central nervous system development
spu-miR-4855	comp11080_c0_seq1	NOTC1_DANRE	NOTC1_DANRE Neurogenic locus notch homolog protein 1 OS=Danio rerio GN=notch1a PE=2 SV=1	320	-46.66	164	-24.6	24	2909	1984 1746	P	GO:0060429	epithelium development
spu-miR-33	comp11080_c0_seq1	NOTC1_DANRE	NOTC1_DANRE Neurogenic locus notch homolog protein 1 OS=Danio rerio GN=notch1a PE=2 SV=1	142	-20.62	142	-20.62	22	2909	1497	P	GO:0042127	regulation of cell proliferation
spu-miR-33	comp11080_c0_seq1	NOTC1_DANRE	NOTC1_DANRE Neurogenic locus notch homolog protein 1 OS=Danio rerio GN=notch1a PE=2 SV=1	142	-20.62	142	-20.62	22	2909	1497	F	GO:0005488	binding
spu-miR-33	comp11080_c0_seq1	NOTC1_DANRE	NOTC1_DANRE Neurogenic locus notch homolog protein 1 OS=Danio rerio GN=notch1a PE=2 SV=1	142	-20.62	142	-20.62	22	2909	1497	P	GO:0042981	regulation of apoptotic process
spu-miR-33	comp11080_c0_seq1	NOTC1_DANRE	NOTC1_DANRE Neurogenic locus notch homolog protein 1 OS=Danio rerio GN=notch1a PE=2 SV=1	142	-20.62	142	-20.62	22	2909	1497	C	GO:0044444	cytoplasmic part
spu-miR-33	comp11080_c0_seq1	NOTC1_DANRE	NOTC1_DANRE Neurogenic locus notch homolog protein 1 OS=Danio rerio GN=notch1a PE=2 SV=1	142	-20.62	142	-20.62	22	2909	1497	P	GO:0050767	regulation of neurogenesis
spu-miR-33	comp11080_c0_seq1	NOTC1_DANRE	NOTC1_DANRE Neurogenic locus notch homolog protein 1 OS=Danio rerio GN=notch1a PE=2 SV=1	142	-20.62	142	-20.62	22	2909	1497	P	GO:0072358	cardiovascular system development
spu-miR-33	comp11080_c0_seq1	NOTC1_DANRE	NOTC1_DANRE Neurogenic locus notch homolog protein 1 OS=Danio rerio GN=notch1a PE=2 SV=1	142	-20.62	142	-20.62	22	2909	1497	P	GO:0040007	growth
spu-miR-33	comp11080_c0_seq1	NOTC1_DANRE	NOTC1_DANRE Neurogenic locus notch homolog protein 1 OS=Danio rerio GN=notch1a PE=2 SV=1	142	-20.62	142	-20.62	22	2909	1497	P	GO:0016043	cellular component organization
spu-miR-33	comp11080_c0_seq1	NOTC1_DANRE	NOTC1_DANRE Neurogenic locus notch homolog protein 1 OS=Danio rerio GN=notch1a PE=2 SV=1	142	-20.62	142	-20.62	22	2909	1497	C	GO:0043231	intracellular membrane-bounded organelle
spu-miR-33	comp11080_c0_seq1	NOTC1_DANRE	NOTC1_DANRE Neurogenic locus notch homolog protein 1 OS=Danio rerio GN=notch1a PE=2 SV=1	142	-20.62	142	-20.62	22	2909	1497	P	GO:0009887	organ morphogenesis
spu-miR-33	comp11080_c0_seq1	NOTC1_DANRE	NOTC1_DANRE Neurogenic locus notch homolog protein 1 OS=Danio rerio GN=notch1a PE=2 SV=1	142	-20.62	142	-20.62	22	2909	1497	P	GO:0048729	tissue morphogenesis
spu-miR-33	comp11080_c0_seq1	NOTC1_DANRE	NOTC1_DANRE Neurogenic locus notch homolog protein 1 OS=Danio rerio GN=notch1a PE=2 SV=1	142	-20.62	142	-20.62	22	2909	1497	P	GO:0007166	cell surface receptor signaling pathway
spu-miR-33	comp11080_c0_seq1	NOTC1_DANRE	NOTC1_DANRE Neurogenic locus notch homolog protein 1 OS=Danio rerio GN=notch1a PE=2 SV=1	142	-20.62	142	-20.62	22	2909	1497	C	GO:0016020	membrane
spu-miR-33	comp11080_c0_seq1	NOTC1_DANRE	NOTC1_DANRE Neurogenic locus notch homolog protein 1 OS=Danio rerio GN=notch1a PE=2 SV=1	142	-20.62	142	-20.62	22	2909	1497	P	GO:0002376	immune system process
spu-miR-33	comp11080_c0_seq1	NOTC1_DANRE	NOTC1_DANRE Neurogenic locus notch homolog protein 1 OS=Danio rerio GN=notch1a PE=2 SV=1	142	-20.62	142	-20.62	22	2909	1497	P	GO:0045596	negative regulation of cell differentiation
spu-miR-33	comp11080_c0_seq1	NOTC1_DANRE	NOTC1_DANRE Neurogenic locus notch homolog protein 1 OS=Danio rerio GN=notch1a PE=2 SV=1	142	-20.62	142	-20.62	22	2909	1497	P	GO:0045597	positive regulation of cell differentiation
spu-miR-33	comp11080_c0_seq1	NOTC1_DANRE	NOTC1_DANRE Neurogenic locus notch homolog protein 1 OS=Danio rerio GN=notch1a PE=2 SV=1	142	-20.62	142	-20.62	22	2909	1497	P	GO:0030182	neuron differentiation
spu-miR-33	comp11080_c0_seq1	NOTC1_DANRE	NOTC1_DANRE Neurogenic locus notch homolog protein 1 OS=Danio rerio GN=notch1a PE=2 SV=1	142	-20.62	142	-20.62	22	2909	1497	P	GO:0048646	anatomical structure formation involved in morphogenesis
spu-miR-33	comp11080_c0_seq1	NOTC1_DANRE	NOTC1_DANRE Neurogenic locus notch homolog protein 1 OS=Danio rerio GN=notch1a PE=2 SV=1	142	-20.62	142	-20.62	22	2909	1497	P	GO:0009967	positive regulation of signal transduction
spu-miR-33	comp11080_c0_seq1	NOTC1_DANRE	NOTC1_DANRE Neurogenic locus notch homolog protein 1 OS=Danio rerio GN=notch1a PE=2 SV=1	142	-20.62	142	-20.62	22	2909	1497	P	GO:0009952	anterior/posterior pattern specification
spu-miR-33	comp11080_c0_seq1	NOTC1_DANRE	NOTC1_DANRE Neurogenic locus notch homolog protein 1 OS=Danio rerio GN=notch1a PE=2 SV=1	142	-20.62	142	-20.62	22	2909	1497	P	GO:0043009	chordate embryonic development
spu-miR-33	comp11080_c0_seq1	NOTC1_DANRE	NOTC1_DANRE Neurogenic locus notch homolog protein 1 OS=Danio rerio GN=notch1a PE=2 SV=1	142	-20.62	142	-20.62	22	2909	1497	P	GO:0022603	regulation of anatomical structure morphogenesis
spu-miR-33	comp11080_c0_seq1	NOTC1_DANRE	NOTC1_DANRE Neurogenic locus notch homolog protein 1 OS=Danio rerio GN=notch1a PE=2 SV=1	142	-20.62	142	-20.62	22	2909	1497	P	GO:0045165	cell fate commitment
spu-miR-33	comp11080_c0_seq1	NOTC1_DANRE	NOTC1_DANRE Neurogenic locus notch homolog protein 1 OS=Danio rerio GN=notch1a PE=2 SV=1	142	-20.62	142	-20.62	22	2909	1497	P	GO:0048598	embryonic morphogenesis
spu-miR-33	comp11080_c0_seq1	NOTC1_DANRE	NOTC1_DANRE Neurogenic locus notch homolog protein 1 OS=Danio rerio GN=notch1a PE=2 SV=1	142	-20.62	142	-20.62	22	2909	1497	P	GO:0006355	regulation of transcription, DNA-dependent
spu-miR-33	comp11080_c0_seq1	NOTC1_DANRE	NOTC1_DANRE Neurogenic locus notch homolog protein 1 OS=Danio rerio GN=notch1a PE=2 SV=1	142	-20.62	142	-20.62	22	2909	1497	P	GO:0042063	gliogenesis
spu-miR-33	comp11080_c0_seq1	NOTC1_DANRE	NOTC1_DANRE Neurogenic locus notch homolog protein 1 OS=Danio rerio GN=notch1a PE=2 SV=1	142	-20.62	142	-20.62	22	2909	1497	P	GO:0007417	central nervous system development
spu-miR-33	comp11080_c0_seq1	NOTC1_DANRE	NOTC1_DANRE Neurogenic locus notch homolog protein 1 OS=Danio rerio GN=notch1a PE=2 SV=1	142	-20.62	142	-20.62	22	2909	1497	P	GO:0060429	epithelium development
spu-miR-34	comp11080_c0_seq1	NOTC1_DANRE	NOTC1_DANRE Neurogenic locus notch homolog protein 1 OS=Danio rerio GN=notch1a PE=2 SV=1	292	-37.15	149	-18.79	22	2909	1552 274	P	GO:0042127	regulation of cell proliferation
spu-miR-34	comp11080_c0_seq1	NOTC1_DANRE	NOTC1_DANRE Neurogenic locus notch homolog protein 1 OS=Danio rerio GN=notch1a PE=2 SV=1	292	-37.15	149	-18.79	22	2909	1552 274	F	GO:0005488	binding
spu-miR-34	comp11080_c0_seq1	NOTC1_DANRE	NOTC1_DANRE Neurogenic locus notch homolog protein 1 OS=Danio rerio GN=notch1a PE=2 SV=1	292	-37.15	149	-18.79	22	2909	1552 274	P	GO:0042981	regulation of apoptotic process
spu-miR-34	comp11080_c0_seq1	NOTC1_DANRE	NOTC1_DANRE Neurogenic locus notch homolog protein 1 OS=Danio rerio GN=notch1a PE=2 SV=1	292	-37.15	149	-18.79	22	2909	1552 274	C	GO:0044444	cytoplasmic part
spu-miR-34	comp11080_c0_seq1	NOTC1_DANRE	NOTC1_DANRE Neurogenic locus notch homolog protein 1 OS=Danio rerio GN=notch1a PE=2 SV=1	292	-37.15	149	-18.79	22	2909	1552 274	P	GO:0050767	regulation of neurogenesis
spu-miR-34	comp11080_c0_seq1	NOTC1_DANRE	NOTC1_DANRE Neurogenic locus notch homolog protein 1 OS=Danio rerio GN=notch1a PE=2 SV=1	292	-37.15	149	-18.79	22	2909	1552 274	P	GO:0072358	cardiovascular system development
spu-miR-34	comp11080_c0_seq1	NOTC1_DANRE	NOTC1_DANRE Neurogenic locus notch homolog protein 1 OS=Danio rerio GN=notch1a PE=2 SV=1	292	-37.15	149	-18.79	22	2909	1552 274	P	GO:0040007	growth
spu-miR-34	comp11080_c0_seq1	NOTC1_DANRE	NOTC1_DANRE Neurogenic locus notch homolog protein 1 OS=Danio rerio GN=notch1a PE=2 SV=1	292	-37.15	149	-18.79	22	2909	1552 274	P	GO:0016043	cellular component organization
spu-miR-34	comp11080_c0_seq1	NOTC1_DANRE	NOTC1_DANRE Neurogenic locus notch homolog protein 1 OS=Danio rerio GN=notch1a PE=2 SV=1	292	-37.15	149	-18.79	22	2909	1552 274	C	GO:0043231	intracellular membrane-bounded organelle
spu-miR-34	comp11080_c0_seq1	NOTC1_DANRE	NOTC1_DANRE Neurogenic locus notch homolog protein 1 OS=Danio rerio GN=notch1a PE=2 SV=1	292	-37.15	149	-18.79	22	2909	1552 274	P	GO:0009887	organ morphogenesis
spu-miR-34	comp11080_c0_seq1	NOTC1_DANRE	NOTC1_DANRE Neurogenic locus notch homolog protein 1 OS=Danio rerio GN=notch1a PE=2 SV=1	292	-37.15	149	-18.79	22	2909	1552 274	P	GO:0048729	tissue morphogenesis
spu-miR-34	comp11080_c0_seq1	NOTC1_DANRE	NOTC1_DANRE Neurogenic locus notch homolog protein 1 OS=Danio rerio GN=notch1a PE=2 SV=1	292	-37.15	149	-18.79	22	2909	1552 274	P	GO:0007166	cell surface receptor signaling pathway
spu-miR-34	comp11080_c0_seq1	NOTC1_DANRE	NOTC1_DANRE Neurogenic locus notch homolog protein 1 OS=Danio rerio GN=notch1a PE=2 SV=1	292	-37.15	149	-18.79	22	2909	1552 274	C	GO:0016020	membrane
spu-miR-34	comp11080_c0_seq1	NOTC1_DANRE	NOTC1_DANRE Neurogenic locus notch homolog protein 1 OS=Danio rerio GN=notch1a PE=2 SV=1	292	-37.15	149	-18.79	22	2909	1552 274	P	GO:0002376	immune system process
spu-miR-34	comp11080_c0_seq1	NOTC1_DANRE	NOTC1_DANRE Neurogenic locus notch homolog protein 1 OS=Danio rerio GN=notch1a PE=2 SV=1	292	-37.15	149	-18.79	22	2909	1552 274	P	GO:0045596	negative regulation of cell differentiation
spu-miR-34	comp11080_c0_seq1	NOTC1_DANRE	NOTC1_DANRE Neurogenic locus notch homolog protein 1 OS=Danio rerio GN=notch1a PE=2 SV=1	292	-37.15	149	-18.79	22	2909	1552 274	P	GO:0045597	positive regulation of cell differentiation
spu-miR-34	comp11080_c0_seq1	NOTC1_DANRE	NOTC1_DANRE Neurogenic locus notch homolog protein 1 OS=Danio rerio GN=notch1a PE=2 SV=1	292	-37.15	149	-18.79	22	2909	1552 274	P	GO:0030182	neuron differentiation
spu-miR-34	comp11080_c0_seq1	NOTC1_DANRE	NOTC1_DANRE Neurogenic locus notch homolog protein 1 OS=Danio rerio GN=notch1a PE=2 SV=1	292	-37.15	149	-18.79	22	2909	1552 274	P	GO:0048646	anatomical structure formation involved in morphogenesis
spu-miR-34	comp11080_c0_seq1	NOTC1_DANRE	NOTC1_DANRE Neurogenic locus notch homolog protein 1 OS=Danio rerio GN=notch1a PE=2 SV=1	292	-37.15	149	-18.79	22	2909	1552 274	P	GO:0009967	positive regulation of signal transduction
spu-miR-34	comp11080_c0_seq1	NOTC1_DANRE	NOTC1_DANRE Neurogenic locus notch homolog protein 1 OS=Danio rerio GN=notch1a PE=2 SV=1	292	-37.15	149	-18.79	22	2909	1552 274	P	GO:0009952	anterior/posterior pattern specification
spu-miR-34	comp11080_c0_seq1	NOTC1_DANRE	NOTC1_DANRE Neurogenic locus notch homolog protein 1 OS=Danio rerio GN=notch1a PE=2 SV=1	292	-37.15	149	-18.79	22	2909	1552 274	P	GO:0043009	chordate embryonic development
spu-miR-34	comp11080_c0_seq1	NOTC1_DANRE	NOTC1_DANRE Neurogenic locus notch homolog protein 1 OS=Danio rerio GN=notch1a PE=2 SV=1	292	-37.15	149	-18.79	22	2909	1552 274	P	GO:0022603	regulation of anatomical structure morphogenesis
spu-miR-34	comp11080_c0_seq1	NOTC1_DANRE	NOTC1_DANRE Neurogenic locus notch homolog protein 1 OS=Danio rerio GN=notch1a PE=2 SV=1	292	-37.15	149	-18.79	22	2909	1552 274	P	GO:0045165	cell fate commitment
spu-miR-34	comp11080_c0_seq1	NOTC1_DANRE	NOTC1_DANRE Neurogenic locus notch homolog protein 1 OS=Danio rerio GN=notch1a PE=2 SV=1	292	-37.15	149	-18.79	22	2909	1552 274	P	GO:0048598	embryonic morphogenesis
spu-miR-34	comp11080_c0_seq1	NOTC1_DANRE	NOTC1_DANRE Neurogenic locus notch homolog protein 1 OS=Danio rerio GN=notch1a PE=2 SV=1	292	-37.15	149	-18.79	22	2909	1552 274	P	GO:0006355	regulation of transcription, DNA-dependent
spu-miR-34	comp11080_c0_seq1	NOTC1_DANRE	NOTC1_DANRE Neurogenic locus notch homolog protein 1 OS=Danio rerio GN=notch1a PE=2 SV=1	292	-37.15	149	-18.79	22	2909	1552 274	P	GO:0042063	gliogenesis
spu-miR-34	comp11080_c0_seq1	NOTC1_DANRE	NOTC1_DANRE Neurogenic locus notch homolog protein 1 OS=Danio rerio GN=notch1a PE=2 SV=1	292	-37.15	149	-18.79	22	2909	1552 274	P	GO:0007417	central nervous system development
spu-miR-34	comp11080_c0_seq1	NOTC1_DANRE	NOTC1_DANRE Neurogenic locus notch homolog protein 1 OS=Danio rerio GN=notch1a PE=2 SV=1	292	-37.15	149	-18.79	22	2909	1552 274	P	GO:0060429	epithelium development
spu-miR-Scaffold53378_527	comp11080_c0_seq1	NOTC1_DANRE	NOTC1_DANRE Neurogenic locus notch homolog protein 1 OS=Danio rerio GN=notch1a PE=2 SV=1	286	-22.97	143	-13.84	24	2909	694 1629	P	GO:0042127	regulation of cell proliferation
spu-miR-Scaffold53378_527	comp11080_c0_seq1	NOTC1_DANRE	NOTC1_DANRE Neurogenic locus notch homolog protein 1 OS=Danio rerio GN=notch1a PE=2 SV=1	286	-22.97	143	-13.84	24	2909	694 1629	F	GO:0005488	binding
spu-miR-Scaffold53378_527	comp11080_c0_seq1	NOTC1_DANRE	NOTC1_DANRE Neurogenic locus notch homolog protein 1 OS=Danio rerio GN=notch1a PE=2 SV=1	286	-22.97	143	-13.84	24	2909	694 1629	P	GO:0042981	regulation of apoptotic process
spu-miR-Scaffold53378_527	comp11080_c0_seq1	NOTC1_DANRE	NOTC1_DANRE Neurogenic locus notch homolog protein 1 OS=Danio rerio GN=notch1a PE=2 SV=1	286	-22.97	143	-13.84	24	2909	694 1629	C	GO:0044444	cytoplasmic part
spu-miR-Scaffold53378_527	comp11080_c0_seq1	NOTC1_DANRE	NOTC1_DANRE Neurogenic locus notch homolog protein 1 OS=Danio rerio GN=notch1a PE=2 SV=1	286	-22.97	143	-13.84	24	2909	694 1629	P	GO:0050767	regulation of neurogenesis
spu-miR-Scaffold53378_527	comp11080_c0_seq1	NOTC1_DANRE	NOTC1_DANRE Neurogenic locus notch homolog protein 1 OS=Danio rerio GN=notch1a PE=2 SV=1	286	-22.97	143	-13.84	24	2909	694 1629	P	GO:0072358	cardiovascular system development
spu-miR-Scaffold53378_527	comp11080_c0_seq1	NOTC1_DANRE	NOTC1_DANRE Neurogenic locus notch homolog protein 1 OS=Danio rerio GN=notch1a PE=2 SV=1	286	-22.97	143	-13.84	24	2909	694 1629	P	GO:0040007	growth
spu-miR-Scaffold53378_527	comp11080_c0_seq1	NOTC1_DANRE	NOTC1_DANRE Neurogenic locus notch homolog protein 1 OS=Danio rerio GN=notch1a PE=2 SV=1	286	-22.97	143	-13.84	24	2909	694 1629	P	GO:0016043	cellular component organization
spu-miR-Scaffold53378_527	comp11080_c0_seq1	NOTC1_DANRE	NOTC1_DANRE Neurogenic locus notch homolog protein 1 OS=Danio rerio GN=notch1a PE=2 SV=1	286	-22.97	143	-13.84	24	2909	694 1629	C	GO:0043231	intracellular membrane-bounded organelle
spu-miR-Scaffold53378_527	comp11080_c0_seq1	NOTC1_DANRE	NOTC1_DANRE Neurogenic locus notch homolog protein 1 OS=Danio rerio GN=notch1a PE=2 SV=1	286	-22.97	143	-13.84	24	2909	694 1629	P	GO:0009887	organ morphogenesis
spu-miR-Scaffold53378_527	comp11080_c0_seq1	NOTC1_DANRE	NOTC1_DANRE Neurogenic locus notch homolog protein 1 OS=Danio rerio GN=notch1a PE=2 SV=1	286	-22.97	143	-13.84	24	2909	694 1629	P	GO:0048729	tissue morphogenesis
spu-miR-Scaffold53378_527	comp11080_c0_seq1	NOTC1_DANRE	NOTC1_DANRE Neurogenic locus notch homolog protein 1 OS=Danio rerio GN=notch1a PE=2 SV=1	286	-22.97	143	-13.84	24	2909	694 1629	P	GO:0007166	cell surface receptor signaling pathway
spu-miR-Scaffold53378_527	comp11080_c0_seq1	NOTC1_DANRE	NOTC1_DANRE Neurogenic locus notch homolog protein 1 OS=Danio rerio GN=notch1a PE=2 SV=1	286	-22.97	143	-13.84	24	2909	694 1629	C	GO:0016020	membrane
spu-miR-Scaffold53378_527	comp11080_c0_seq1	NOTC1_DANRE	NOTC1_DANRE Neurogenic locus notch homolog protein 1 OS=Danio rerio GN=notch1a PE=2 SV=1	286	-22.97	143	-13.84	24	2909	694 1629	P	GO:0002376	immune system process
spu-miR-Scaffold53378_527	comp11080_c0_seq1	NOTC1_DANRE	NOTC1_DANRE Neurogenic locus notch homolog protein 1 OS=Danio rerio GN=notch1a PE=2 SV=1	286	-22.97	143	-13.84	24	2909	694 1629	P	GO:0045596	negative regulation of cell differentiation
spu-miR-Scaffold53378_527	comp11080_c0_seq1	NOTC1_DANRE	NOTC1_DANRE Neurogenic locus notch homolog protein 1 OS=Danio rerio GN=notch1a PE=2 SV=1	286	-22.97	143	-13.84	24	2909	694 1629	P	GO:0045597	positive regulation of cell differentiation
spu-miR-Scaffold53378_527	comp11080_c0_seq1	NOTC1_DANRE	NOTC1_DANRE Neurogenic locus notch homolog protein 1 OS=Danio rerio GN=notch1a PE=2 SV=1	286	-22.97	143	-13.84	24	2909	694 1629	P	GO:0030182	neuron differentiation
spu-miR-Scaffold53378_527	comp11080_c0_seq1	NOTC1_DANRE	NOTC1_DANRE Neurogenic locus notch homolog protein 1 OS=Danio rerio GN=notch1a PE=2 SV=1	286	-22.97	143	-13.84	24	2909	694 1629	P	GO:0048646	anatomical structure formation involved in morphogenesis
spu-miR-Scaffold53378_527	comp11080_c0_seq1	NOTC1_DANRE	NOTC1_DANRE Neurogenic locus notch homolog protein 1 OS=Danio rerio GN=notch1a PE=2 SV=1	286	-22.97	143	-13.84	24	2909	694 1629	P	GO:0009967	positive regulation of signal transduction
spu-miR-Scaffold53378_527	comp11080_c0_seq1	NOTC1_DANRE	NOTC1_DANRE Neurogenic locus notch homolog protein 1 OS=Danio rerio GN=notch1a PE=2 SV=1	286	-22.97	143	-13.84	24	2909	694 1629	P	GO:0009952	anterior/posterior pattern specification
spu-miR-Scaffold53378_527	comp11080_c0_seq1	NOTC1_DANRE	NOTC1_DANRE Neurogenic locus notch homolog protein 1 OS=Danio rerio GN=notch1a PE=2 SV=1	286	-22.97	143	-13.84	24	2909	694 1629	P	GO:0043009	chordate embryonic development
spu-miR-Scaffold53378_527	comp11080_c0_seq1	NOTC1_DANRE	NOTC1_DANRE Neurogenic locus notch homolog protein 1 OS=Danio rerio GN=notch1a PE=2 SV=1	286	-22.97	143	-13.84	24	2909	694 1629	P	GO:0022603	regulation of anatomical structure morphogenesis
spu-miR-Scaffold53378_527	comp11080_c0_seq1	NOTC1_DANRE	NOTC1_DANRE Neurogenic locus notch homolog protein 1 OS=Danio rerio GN=notch1a PE=2 SV=1	286	-22.97	143	-13.84	24	2909	694 1629	P	GO:0045165	cell fate commitment
spu-miR-Scaffold53378_527	comp11080_c0_seq1	NOTC1_DANRE	NOTC1_DANRE Neurogenic locus notch homolog protein 1 OS=Danio rerio GN=notch1a PE=2 SV=1	286	-22.97	143	-13.84	24	2909	694 1629	P	GO:0048598	embryonic morphogenesis
spu-miR-Scaffold53378_527	comp11080_c0_seq1	NOTC1_DANRE	NOTC1_DANRE Neurogenic locus notch homolog protein 1 OS=Danio rerio GN=notch1a PE=2 SV=1	286	-22.97	143	-13.84	24	2909	694 1629	P	GO:0006355	regulation of transcription, DNA-dependent
spu-miR-Scaffold53378_527	comp11080_c0_seq1	NOTC1_DANRE	NOTC1_DANRE Neurogenic locus notch homolog protein 1 OS=Danio rerio GN=notch1a PE=2 SV=1	286	-22.97	143	-13.84	24	2909	694 1629	P	GO:0042063	gliogenesis
spu-miR-Scaffold53378_527	comp11080_c0_seq1	NOTC1_DANRE	NOTC1_DANRE Neurogenic locus notch homolog protein 1 OS=Danio rerio GN=notch1a PE=2 SV=1	286	-22.97	143	-13.84	24	2909	694 1629	P	GO:0007417	central nervous system development
spu-miR-Scaffold53378_527	comp11080_c0_seq1	NOTC1_DANRE	NOTC1_DANRE Neurogenic locus notch homolog protein 1 OS=Danio rerio GN=notch1a PE=2 SV=1	286	-22.97	143	-13.84	24	2909	694 1629	P	GO:0060429	epithelium development
spu-miR-Scaffold54271_281	comp11080_c0_seq1	NOTC1_DANRE	NOTC1_DANRE Neurogenic locus notch homolog protein 1 OS=Danio rerio GN=notch1a PE=2 SV=1	304	-28.32	160	-15.26	19	2909	461 1589	P	GO:0042127	regulation of cell proliferation
spu-miR-Scaffold54271_281	comp11080_c0_seq1	NOTC1_DANRE	NOTC1_DANRE Neurogenic locus notch homolog protein 1 OS=Danio rerio GN=notch1a PE=2 SV=1	304	-28.32	160	-15.26	19	2909	461 1589	F	GO:0005488	binding
spu-miR-Scaffold54271_281	comp11080_c0_seq1	NOTC1_DANRE	NOTC1_DANRE Neurogenic locus notch homolog protein 1 OS=Danio rerio GN=notch1a PE=2 SV=1	304	-28.32	160	-15.26	19	2909	461 1589	P	GO:0042981	regulation of apoptotic process
spu-miR-Scaffold54271_281	comp11080_c0_seq1	NOTC1_DANRE	NOTC1_DANRE Neurogenic locus notch homolog protein 1 OS=Danio rerio GN=notch1a PE=2 SV=1	304	-28.32	160	-15.26	19	2909	461 1589	C	GO:0044444	cytoplasmic part
spu-miR-Scaffold54271_281	comp11080_c0_seq1	NOTC1_DANRE	NOTC1_DANRE Neurogenic locus notch homolog protein 1 OS=Danio rerio GN=notch1a PE=2 SV=1	304	-28.32	160	-15.26	19	2909	461 1589	P	GO:0050767	regulation of neurogenesis
spu-miR-Scaffold54271_281	comp11080_c0_seq1	NOTC1_DANRE	NOTC1_DANRE Neurogenic locus notch homolog protein 1 OS=Danio rerio GN=notch1a PE=2 SV=1	304	-28.32	160	-15.26	19	2909	461 1589	P	GO:0072358	cardiovascular system development
spu-miR-Scaffold54271_281	comp11080_c0_seq1	NOTC1_DANRE	NOTC1_DANRE Neurogenic locus notch homolog protein 1 OS=Danio rerio GN=notch1a PE=2 SV=1	304	-28.32	160	-15.26	19	2909	461 1589	P	GO:0040007	growth
spu-miR-Scaffold54271_281	comp11080_c0_seq1	NOTC1_DANRE	NOTC1_DANRE Neurogenic locus notch homolog protein 1 OS=Danio rerio GN=notch1a PE=2 SV=1	304	-28.32	160	-15.26	19	2909	461 1589	P	GO:0016043	cellular component organization
spu-miR-Scaffold54271_281	comp11080_c0_seq1	NOTC1_DANRE	NOTC1_DANRE Neurogenic locus notch homolog protein 1 OS=Danio rerio GN=notch1a PE=2 SV=1	304	-28.32	160	-15.26	19	2909	461 1589	C	GO:0043231	intracellular membrane-bounded organelle
spu-miR-Scaffold54271_281	comp11080_c0_seq1	NOTC1_DANRE	NOTC1_DANRE Neurogenic locus notch homolog protein 1 OS=Danio rerio GN=notch1a PE=2 SV=1	304	-28.32	160	-15.26	19	2909	461 1589	P	GO:0009887	organ morphogenesis
spu-miR-Scaffold54271_281	comp11080_c0_seq1	NOTC1_DANRE	NOTC1_DANRE Neurogenic locus notch homolog protein 1 OS=Danio rerio GN=notch1a PE=2 SV=1	304	-28.32	160	-15.26	19	2909	461 1589	P	GO:0048729	tissue morphogenesis
spu-miR-Scaffold54271_281	comp11080_c0_seq1	NOTC1_DANRE	NOTC1_DANRE Neurogenic locus notch homolog protein 1 OS=Danio rerio GN=notch1a PE=2 SV=1	304	-28.32	160	-15.26	19	2909	461 1589	P	GO:0007166	cell surface receptor signaling pathway
spu-miR-Scaffold54271_281	comp11080_c0_seq1	NOTC1_DANRE	NOTC1_DANRE Neurogenic locus notch homolog protein 1 OS=Danio rerio GN=notch1a PE=2 SV=1	304	-28.32	160	-15.26	19	2909	461 1589	C	GO:0016020	membrane
spu-miR-Scaffold54271_281	comp11080_c0_seq1	NOTC1_DANRE	NOTC1_DANRE Neurogenic locus notch homolog protein 1 OS=Danio rerio GN=notch1a PE=2 SV=1	304	-28.32	160	-15.26	19	2909	461 1589	P	GO:0002376	immune system process
spu-miR-Scaffold54271_281	comp11080_c0_seq1	NOTC1_DANRE	NOTC1_DANRE Neurogenic locus notch homolog protein 1 OS=Danio rerio GN=notch1a PE=2 SV=1	304	-28.32	160	-15.26	19	2909	461 1589	P	GO:0045596	negative regulation of cell differentiation
spu-miR-Scaffold54271_281	comp11080_c0_seq1	NOTC1_DANRE	NOTC1_DANRE Neurogenic locus notch homolog protein 1 OS=Danio rerio GN=notch1a PE=2 SV=1	304	-28.32	160	-15.26	19	2909	461 1589	P	GO:0045597	positive regulation of cell differentiation
spu-miR-Scaffold54271_281	comp11080_c0_seq1	NOTC1_DANRE	NOTC1_DANRE Neurogenic locus notch homolog protein 1 OS=Danio rerio GN=notch1a PE=2 SV=1	304	-28.32	160	-15.26	19	2909	461 1589	P	GO:0030182	neuron differentiation
spu-miR-Scaffold54271_281	comp11080_c0_seq1	NOTC1_DANRE	NOTC1_DANRE Neurogenic locus notch homolog protein 1 OS=Danio rerio GN=notch1a PE=2 SV=1	304	-28.32	160	-15.26	19	2909	461 1589	P	GO:0048646	anatomical structure formation involved in morphogenesis
spu-miR-Scaffold54271_281	comp11080_c0_seq1	NOTC1_DANRE	NOTC1_DANRE Neurogenic locus notch homolog protein 1 OS=Danio rerio GN=notch1a PE=2 SV=1	304	-28.32	160	-15.26	19	2909	461 1589	P	GO:0009967	positive regulation of signal transduction
spu-miR-Scaffold54271_281	comp11080_c0_seq1	NOTC1_DANRE	NOTC1_DANRE Neurogenic locus notch homolog protein 1 OS=Danio rerio GN=notch1a PE=2 SV=1	304	-28.32	160	-15.26	19	2909	461 1589	P	GO:0009952	anterior/posterior pattern specification
spu-miR-Scaffold54271_281	comp11080_c0_seq1	NOTC1_DANRE	NOTC1_DANRE Neurogenic locus notch homolog protein 1 OS=Danio rerio GN=notch1a PE=2 SV=1	304	-28.32	160	-15.26	19	2909	461 1589	P	GO:0043009	chordate embryonic development
spu-miR-Scaffold54271_281	comp11080_c0_seq1	NOTC1_DANRE	NOTC1_DANRE Neurogenic locus notch homolog protein 1 OS=Danio rerio GN=notch1a PE=2 SV=1	304	-28.32	160	-15.26	19	2909	461 1589	P	GO:0022603	regulation of anatomical structure morphogenesis
spu-miR-Scaffold54271_281	comp11080_c0_seq1	NOTC1_DANRE	NOTC1_DANRE Neurogenic locus notch homolog protein 1 OS=Danio rerio GN=notch1a PE=2 SV=1	304	-28.32	160	-15.26	19	2909	461 1589	P	GO:0045165	cell fate commitment
spu-miR-Scaffold54271_281	comp11080_c0_seq1	NOTC1_DANRE	NOTC1_DANRE Neurogenic locus notch homolog protein 1 OS=Danio rerio GN=notch1a PE=2 SV=1	304	-28.32	160	-15.26	19	2909	461 1589	P	GO:0048598	embryonic morphogenesis
spu-miR-Scaffold54271_281	comp11080_c0_seq1	NOTC1_DANRE	NOTC1_DANRE Neurogenic locus notch homolog protein 1 OS=Danio rerio GN=notch1a PE=2 SV=1	304	-28.32	160	-15.26	19	2909	461 1589	P	GO:0006355	regulation of transcription, DNA-dependent
spu-miR-Scaffold54271_281	comp11080_c0_seq1	NOTC1_DANRE	NOTC1_DANRE Neurogenic locus notch homolog protein 1 OS=Danio rerio GN=notch1a PE=2 SV=1	304	-28.32	160	-15.26	19	2909	461 1589	P	GO:0042063	gliogenesis
spu-miR-Scaffold54271_281	comp11080_c0_seq1	NOTC1_DANRE	NOTC1_DANRE Neurogenic locus notch homolog protein 1 OS=Danio rerio GN=notch1a PE=2 SV=1	304	-28.32	160	-15.26	19	2909	461 1589	P	GO:0007417	central nervous system development
spu-miR-Scaffold54271_281	comp11080_c0_seq1	NOTC1_DANRE	NOTC1_DANRE Neurogenic locus notch homolog protein 1 OS=Danio rerio GN=notch1a PE=2 SV=1	304	-28.32	160	-15.26	19	2909	461 1589	P	GO:0060429	epithelium development
spu-miR-Scaffold36370_15	comp11080_c0_seq1	NOTC1_DANRE	NOTC1_DANRE Neurogenic locus notch homolog protein 1 OS=Danio rerio GN=notch1a PE=2 SV=1	140	-22.81	140	-22.81	21	2909	380	P	GO:0042127	regulation of cell proliferation
spu-miR-Scaffold36370_15	comp11080_c0_seq1	NOTC1_DANRE	NOTC1_DANRE Neurogenic locus notch homolog protein 1 OS=Danio rerio GN=notch1a PE=2 SV=1	140	-22.81	140	-22.81	21	2909	380	F	GO:0005488	binding
spu-miR-Scaffold36370_15	comp11080_c0_seq1	NOTC1_DANRE	NOTC1_DANRE Neurogenic locus notch homolog protein 1 OS=Danio rerio GN=notch1a PE=2 SV=1	140	-22.81	140	-22.81	21	2909	380	P	GO:0042981	regulation of apoptotic process
spu-miR-Scaffold36370_15	comp11080_c0_seq1	NOTC1_DANRE	NOTC1_DANRE Neurogenic locus notch homolog protein 1 OS=Danio rerio GN=notch1a PE=2 SV=1	140	-22.81	140	-22.81	21	2909	380	C	GO:0044444	cytoplasmic part
spu-miR-Scaffold36370_15	comp11080_c0_seq1	NOTC1_DANRE	NOTC1_DANRE Neurogenic locus notch homolog protein 1 OS=Danio rerio GN=notch1a PE=2 SV=1	140	-22.81	140	-22.81	21	2909	380	P	GO:0050767	regulation of neurogenesis
spu-miR-Scaffold36370_15	comp11080_c0_seq1	NOTC1_DANRE	NOTC1_DANRE Neurogenic locus notch homolog protein 1 OS=Danio rerio GN=notch1a PE=2 SV=1	140	-22.81	140	-22.81	21	2909	380	P	GO:0072358	cardiovascular system development
spu-miR-Scaffold36370_15	comp11080_c0_seq1	NOTC1_DANRE	NOTC1_DANRE Neurogenic locus notch homolog protein 1 OS=Danio rerio GN=notch1a PE=2 SV=1	140	-22.81	140	-22.81	21	2909	380	P	GO:0040007	growth
spu-miR-Scaffold36370_15	comp11080_c0_seq1	NOTC1_DANRE	NOTC1_DANRE Neurogenic locus notch homolog protein 1 OS=Danio rerio GN=notch1a PE=2 SV=1	140	-22.81	140	-22.81	21	2909	380	P	GO:0016043	cellular component organization
spu-miR-Scaffold36370_15	comp11080_c0_seq1	NOTC1_DANRE	NOTC1_DANRE Neurogenic locus notch homolog protein 1 OS=Danio rerio GN=notch1a PE=2 SV=1	140	-22.81	140	-22.81	21	2909	380	C	GO:0043231	intracellular membrane-bounded organelle
spu-miR-Scaffold36370_15	comp11080_c0_seq1	NOTC1_DANRE	NOTC1_DANRE Neurogenic locus notch homolog protein 1 OS=Danio rerio GN=notch1a PE=2 SV=1	140	-22.81	140	-22.81	21	2909	380	P	GO:0009887	organ morphogenesis
spu-miR-Scaffold36370_15	comp11080_c0_seq1	NOTC1_DANRE	NOTC1_DANRE Neurogenic locus notch homolog protein 1 OS=Danio rerio GN=notch1a PE=2 SV=1	140	-22.81	140	-22.81	21	2909	380	P	GO:0048729	tissue morphogenesis
spu-miR-Scaffold36370_15	comp11080_c0_seq1	NOTC1_DANRE	NOTC1_DANRE Neurogenic locus notch homolog protein 1 OS=Danio rerio GN=notch1a PE=2 SV=1	140	-22.81	140	-22.81	21	2909	380	P	GO:0007166	cell surface receptor signaling pathway
spu-miR-Scaffold36370_15	comp11080_c0_seq1	NOTC1_DANRE	NOTC1_DANRE Neurogenic locus notch homolog protein 1 OS=Danio rerio GN=notch1a PE=2 SV=1	140	-22.81	140	-22.81	21	2909	380	C	GO:0016020	membrane
spu-miR-Scaffold36370_15	comp11080_c0_seq1	NOTC1_DANRE	NOTC1_DANRE Neurogenic locus notch homolog protein 1 OS=Danio rerio GN=notch1a PE=2 SV=1	140	-22.81	140	-22.81	21	2909	380	P	GO:0002376	immune system process
spu-miR-Scaffold36370_15	comp11080_c0_seq1	NOTC1_DANRE	NOTC1_DANRE Neurogenic locus notch homolog protein 1 OS=Danio rerio GN=notch1a PE=2 SV=1	140	-22.81	140	-22.81	21	2909	380	P	GO:0045596	negative regulation of cell differentiation
spu-miR-Scaffold36370_15	comp11080_c0_seq1	NOTC1_DANRE	NOTC1_DANRE Neurogenic locus notch homolog protein 1 OS=Danio rerio GN=notch1a PE=2 SV=1	140	-22.81	140	-22.81	21	2909	380	P	GO:0045597	positive regulation of cell differentiation
spu-miR-Scaffold36370_15	comp11080_c0_seq1	NOTC1_DANRE	NOTC1_DANRE Neurogenic locus notch homolog protein 1 OS=Danio rerio GN=notch1a PE=2 SV=1	140	-22.81	140	-22.81	21	2909	380	P	GO:0030182	neuron differentiation
spu-miR-Scaffold36370_15	comp11080_c0_seq1	NOTC1_DANRE	NOTC1_DANRE Neurogenic locus notch homolog protein 1 OS=Danio rerio GN=notch1a PE=2 SV=1	140	-22.81	140	-22.81	21	2909	380	P	GO:0048646	anatomical structure formation involved in morphogenesis
spu-miR-Scaffold36370_15	comp11080_c0_seq1	NOTC1_DANRE	NOTC1_DANRE Neurogenic locus notch homolog protein 1 OS=Danio rerio GN=notch1a PE=2 SV=1	140	-22.81	140	-22.81	21	2909	380	P	GO:0009967	positive regulation of signal transduction
spu-miR-Scaffold36370_15	comp11080_c0_seq1	NOTC1_DANRE	NOTC1_DANRE Neurogenic locus notch homolog protein 1 OS=Danio rerio GN=notch1a PE=2 SV=1	140	-22.81	140	-22.81	21	2909	380	P	GO:0009952	anterior/posterior pattern specification
spu-miR-Scaffold36370_15	comp11080_c0_seq1	NOTC1_DANRE	NOTC1_DANRE Neurogenic locus notch homolog protein 1 OS=Danio rerio GN=notch1a PE=2 SV=1	140	-22.81	140	-22.81	21	2909	380	P	GO:0043009	chordate embryonic development
spu-miR-Scaffold36370_15	comp11080_c0_seq1	NOTC1_DANRE	NOTC1_DANRE Neurogenic locus notch homolog protein 1 OS=Danio rerio GN=notch1a PE=2 SV=1	140	-22.81	140	-22.81	21	2909	380	P	GO:0022603	regulation of anatomical structure morphogenesis
spu-miR-Scaffold36370_15	comp11080_c0_seq1	NOTC1_DANRE	NOTC1_DANRE Neurogenic locus notch homolog protein 1 OS=Danio rerio GN=notch1a PE=2 SV=1	140	-22.81	140	-22.81	21	2909	380	P	GO:0045165	cell fate commitment
spu-miR-Scaffold36370_15	comp11080_c0_seq1	NOTC1_DANRE	NOTC1_DANRE Neurogenic locus notch homolog protein 1 OS=Danio rerio GN=notch1a PE=2 SV=1	140	-22.81	140	-22.81	21	2909	380	P	GO:0048598	embryonic morphogenesis
spu-miR-Scaffold36370_15	comp11080_c0_seq1	NOTC1_DANRE	NOTC1_DANRE Neurogenic locus notch homolog protein 1 OS=Danio rerio GN=notch1a PE=2 SV=1	140	-22.81	140	-22.81	21	2909	380	P	GO:0006355	regulation of transcription, DNA-dependent
spu-miR-Scaffold36370_15	comp11080_c0_seq1	NOTC1_DANRE	NOTC1_DANRE Neurogenic locus notch homolog protein 1 OS=Danio rerio GN=notch1a PE=2 SV=1	140	-22.81	140	-22.81	21	2909	380	P	GO:0042063	gliogenesis
spu-miR-Scaffold36370_15	comp11080_c0_seq1	NOTC1_DANRE	NOTC1_DANRE Neurogenic locus notch homolog protein 1 OS=Danio rerio GN=notch1a PE=2 SV=1	140	-22.81	140	-22.81	21	2909	380	P	GO:0007417	central nervous system development
spu-miR-Scaffold36370_15	comp11080_c0_seq1	NOTC1_DANRE	NOTC1_DANRE Neurogenic locus notch homolog protein 1 OS=Danio rerio GN=notch1a PE=2 SV=1	140	-22.81	140	-22.81	21	2909	380	P	GO:0060429	epithelium development
spu-miR-2012	comp11080_c0_seq2	NOTC1_DANRE	NOTC1_DANRE Neurogenic locus notch homolog protein 1 OS=Danio rerio GN=notch1a PE=2 SV=1	151	-21.51	151	-21.51	22	2907	2160	P	GO:0006355	regulation of transcription, DNA-dependent
spu-miR-2012	comp11080_c0_seq2	NOTC1_DANRE	NOTC1_DANRE Neurogenic locus notch homolog protein 1 OS=Danio rerio GN=notch1a PE=2 SV=1	151	-21.51	151	-21.51	22	2907	2160	P	GO:0045165	cell fate commitment
spu-miR-2012	comp11080_c0_seq2	NOTC1_DANRE	NOTC1_DANRE Neurogenic locus notch homolog protein 1 OS=Danio rerio GN=notch1a PE=2 SV=1	151	-21.51	151	-21.51	22	2907	2160	P	GO:0048646	anatomical structure formation involved in morphogenesis
spu-miR-2012	comp11080_c0_seq2	NOTC1_DANRE	NOTC1_DANRE Neurogenic locus notch homolog protein 1 OS=Danio rerio GN=notch1a PE=2 SV=1	151	-21.51	151	-21.51	22	2907	2160	P	GO:0022603	regulation of anatomical structure morphogenesis
spu-miR-2012	comp11080_c0_seq2	NOTC1_DANRE	NOTC1_DANRE Neurogenic locus notch homolog protein 1 OS=Danio rerio GN=notch1a PE=2 SV=1	151	-21.51	151	-21.51	22	2907	2160	P	GO:0042127	regulation of cell proliferation
spu-miR-2012	comp11080_c0_seq2	NOTC1_DANRE	NOTC1_DANRE Neurogenic locus notch homolog protein 1 OS=Danio rerio GN=notch1a PE=2 SV=1	151	-21.51	151	-21.51	22	2907	2160	P	GO:0048598	embryonic morphogenesis
spu-miR-2012	comp11080_c0_seq2	NOTC1_DANRE	NOTC1_DANRE Neurogenic locus notch homolog protein 1 OS=Danio rerio GN=notch1a PE=2 SV=1	151	-21.51	151	-21.51	22	2907	2160	P	GO:0040007	growth
spu-miR-2012	comp11080_c0_seq2	NOTC1_DANRE	NOTC1_DANRE Neurogenic locus notch homolog protein 1 OS=Danio rerio GN=notch1a PE=2 SV=1	151	-21.51	151	-21.51	22	2907	2160	P	GO:0009967	positive regulation of signal transduction
spu-miR-2012	comp11080_c0_seq2	NOTC1_DANRE	NOTC1_DANRE Neurogenic locus notch homolog protein 1 OS=Danio rerio GN=notch1a PE=2 SV=1	151	-21.51	151	-21.51	22	2907	2160	P	GO:0050767	regulation of neurogenesis
spu-miR-2012	comp11080_c0_seq2	NOTC1_DANRE	NOTC1_DANRE Neurogenic locus notch homolog protein 1 OS=Danio rerio GN=notch1a PE=2 SV=1	151	-21.51	151	-21.51	22	2907	2160	C	GO:0044444	cytoplasmic part
spu-miR-2012	comp11080_c0_seq2	NOTC1_DANRE	NOTC1_DANRE Neurogenic locus notch homolog protein 1 OS=Danio rerio GN=notch1a PE=2 SV=1	151	-21.51	151	-21.51	22	2907	2160	P	GO:0042063	gliogenesis
spu-miR-2012	comp11080_c0_seq2	NOTC1_DANRE	NOTC1_DANRE Neurogenic locus notch homolog protein 1 OS=Danio rerio GN=notch1a PE=2 SV=1	151	-21.51	151	-21.51	22	2907	2160	P	GO:0048729	tissue morphogenesis
spu-miR-2012	comp11080_c0_seq2	NOTC1_DANRE	NOTC1_DANRE Neurogenic locus notch homolog protein 1 OS=Danio rerio GN=notch1a PE=2 SV=1	151	-21.51	151	-21.51	22	2907	2160	P	GO:0016043	cellular component organization
spu-miR-2012	comp11080_c0_seq2	NOTC1_DANRE	NOTC1_DANRE Neurogenic locus notch homolog protein 1 OS=Danio rerio GN=notch1a PE=2 SV=1	151	-21.51	151	-21.51	22	2907	2160	P	GO:0007417	central nervous system development
spu-miR-2012	comp11080_c0_seq2	NOTC1_DANRE	NOTC1_DANRE Neurogenic locus notch homolog protein 1 OS=Danio rerio GN=notch1a PE=2 SV=1	151	-21.51	151	-21.51	22	2907	2160	P	GO:0060429	epithelium development
spu-miR-2012	comp11080_c0_seq2	NOTC1_DANRE	NOTC1_DANRE Neurogenic locus notch homolog protein 1 OS=Danio rerio GN=notch1a PE=2 SV=1	151	-21.51	151	-21.51	22	2907	2160	P	GO:0043009	chordate embryonic development
spu-miR-2012	comp11080_c0_seq2	NOTC1_DANRE	NOTC1_DANRE Neurogenic locus notch homolog protein 1 OS=Danio rerio GN=notch1a PE=2 SV=1	151	-21.51	151	-21.51	22	2907	2160	P	GO:0030182	neuron differentiation
spu-miR-2012	comp11080_c0_seq2	NOTC1_DANRE	NOTC1_DANRE Neurogenic locus notch homolog protein 1 OS=Danio rerio GN=notch1a PE=2 SV=1	151	-21.51	151	-21.51	22	2907	2160	P	GO:0045597	positive regulation of cell differentiation
spu-miR-2012	comp11080_c0_seq2	NOTC1_DANRE	NOTC1_DANRE Neurogenic locus notch homolog protein 1 OS=Danio rerio GN=notch1a PE=2 SV=1	151	-21.51	151	-21.51	22	2907	2160	P	GO:0045596	negative regulation of cell differentiation
spu-miR-2012	comp11080_c0_seq2	NOTC1_DANRE	NOTC1_DANRE Neurogenic locus notch homolog protein 1 OS=Danio rerio GN=notch1a PE=2 SV=1	151	-21.51	151	-21.51	22	2907	2160	P	GO:0002376	immune system process
spu-miR-2012	comp11080_c0_seq2	NOTC1_DANRE	NOTC1_DANRE Neurogenic locus notch homolog protein 1 OS=Danio rerio GN=notch1a PE=2 SV=1	151	-21.51	151	-21.51	22	2907	2160	C	GO:0016020	membrane
spu-miR-2012	comp11080_c0_seq2	NOTC1_DANRE	NOTC1_DANRE Neurogenic locus notch homolog protein 1 OS=Danio rerio GN=notch1a PE=2 SV=1	151	-21.51	151	-21.51	22	2907	2160	P	GO:0072358	cardiovascular system development
spu-miR-2012	comp11080_c0_seq2	NOTC1_DANRE	NOTC1_DANRE Neurogenic locus notch homolog protein 1 OS=Danio rerio GN=notch1a PE=2 SV=1	151	-21.51	151	-21.51	22	2907	2160	P	GO:0009952	anterior/posterior pattern specification
spu-miR-2012	comp11080_c0_seq2	NOTC1_DANRE	NOTC1_DANRE Neurogenic locus notch homolog protein 1 OS=Danio rerio GN=notch1a PE=2 SV=1	151	-21.51	151	-21.51	22	2907	2160	P	GO:0009887	organ morphogenesis
spu-miR-2012	comp11080_c0_seq2	NOTC1_DANRE	NOTC1_DANRE Neurogenic locus notch homolog protein 1 OS=Danio rerio GN=notch1a PE=2 SV=1	151	-21.51	151	-21.51	22	2907	2160	C	GO:0043231	intracellular membrane-bounded organelle
spu-miR-2012	comp11080_c0_seq2	NOTC1_DANRE	NOTC1_DANRE Neurogenic locus notch homolog protein 1 OS=Danio rerio GN=notch1a PE=2 SV=1	151	-21.51	151	-21.51	22	2907	2160	F	GO:0005488	binding
spu-miR-2012	comp11080_c0_seq2	NOTC1_DANRE	NOTC1_DANRE Neurogenic locus notch homolog protein 1 OS=Danio rerio GN=notch1a PE=2 SV=1	151	-21.51	151	-21.51	22	2907	2160	P	GO:0007166	cell surface receptor signaling pathway
spu-miR-2012	comp11080_c0_seq2	NOTC1_DANRE	NOTC1_DANRE Neurogenic locus notch homolog protein 1 OS=Danio rerio GN=notch1a PE=2 SV=1	151	-21.51	151	-21.51	22	2907	2160	P	GO:0042981	regulation of apoptotic process
spu-miR-219	comp11080_c0_seq2	NOTC1_DANRE	NOTC1_DANRE Neurogenic locus notch homolog protein 1 OS=Danio rerio GN=notch1a PE=2 SV=1	151	-21.95	151	-21.95	23	2907	2825	P	GO:0006355	regulation of transcription, DNA-dependent
spu-miR-219	comp11080_c0_seq2	NOTC1_DANRE	NOTC1_DANRE Neurogenic locus notch homolog protein 1 OS=Danio rerio GN=notch1a PE=2 SV=1	151	-21.95	151	-21.95	23	2907	2825	P	GO:0045165	cell fate commitment
spu-miR-219	comp11080_c0_seq2	NOTC1_DANRE	NOTC1_DANRE Neurogenic locus notch homolog protein 1 OS=Danio rerio GN=notch1a PE=2 SV=1	151	-21.95	151	-21.95	23	2907	2825	P	GO:0048646	anatomical structure formation involved in morphogenesis
spu-miR-219	comp11080_c0_seq2	NOTC1_DANRE	NOTC1_DANRE Neurogenic locus notch homolog protein 1 OS=Danio rerio GN=notch1a PE=2 SV=1	151	-21.95	151	-21.95	23	2907	2825	P	GO:0022603	regulation of anatomical structure morphogenesis
spu-miR-219	comp11080_c0_seq2	NOTC1_DANRE	NOTC1_DANRE Neurogenic locus notch homolog protein 1 OS=Danio rerio GN=notch1a PE=2 SV=1	151	-21.95	151	-21.95	23	2907	2825	P	GO:0042127	regulation of cell proliferation
spu-miR-219	comp11080_c0_seq2	NOTC1_DANRE	NOTC1_DANRE Neurogenic locus notch homolog protein 1 OS=Danio rerio GN=notch1a PE=2 SV=1	151	-21.95	151	-21.95	23	2907	2825	P	GO:0048598	embryonic morphogenesis
spu-miR-219	comp11080_c0_seq2	NOTC1_DANRE	NOTC1_DANRE Neurogenic locus notch homolog protein 1 OS=Danio rerio GN=notch1a PE=2 SV=1	151	-21.95	151	-21.95	23	2907	2825	P	GO:0040007	growth
spu-miR-219	comp11080_c0_seq2	NOTC1_DANRE	NOTC1_DANRE Neurogenic locus notch homolog protein 1 OS=Danio rerio GN=notch1a PE=2 SV=1	151	-21.95	151	-21.95	23	2907	2825	P	GO:0009967	positive regulation of signal transduction
spu-miR-219	comp11080_c0_seq2	NOTC1_DANRE	NOTC1_DANRE Neurogenic locus notch homolog protein 1 OS=Danio rerio GN=notch1a PE=2 SV=1	151	-21.95	151	-21.95	23	2907	2825	P	GO:0050767	regulation of neurogenesis
spu-miR-219	comp11080_c0_seq2	NOTC1_DANRE	NOTC1_DANRE Neurogenic locus notch homolog protein 1 OS=Danio rerio GN=notch1a PE=2 SV=1	151	-21.95	151	-21.95	23	2907	2825	C	GO:0044444	cytoplasmic part
spu-miR-219	comp11080_c0_seq2	NOTC1_DANRE	NOTC1_DANRE Neurogenic locus notch homolog protein 1 OS=Danio rerio GN=notch1a PE=2 SV=1	151	-21.95	151	-21.95	23	2907	2825	P	GO:0042063	gliogenesis
spu-miR-219	comp11080_c0_seq2	NOTC1_DANRE	NOTC1_DANRE Neurogenic locus notch homolog protein 1 OS=Danio rerio GN=notch1a PE=2 SV=1	151	-21.95	151	-21.95	23	2907	2825	P	GO:0048729	tissue morphogenesis
spu-miR-219	comp11080_c0_seq2	NOTC1_DANRE	NOTC1_DANRE Neurogenic locus notch homolog protein 1 OS=Danio rerio GN=notch1a PE=2 SV=1	151	-21.95	151	-21.95	23	2907	2825	P	GO:0016043	cellular component organization
spu-miR-219	comp11080_c0_seq2	NOTC1_DANRE	NOTC1_DANRE Neurogenic locus notch homolog protein 1 OS=Danio rerio GN=notch1a PE=2 SV=1	151	-21.95	151	-21.95	23	2907	2825	P	GO:0007417	central nervous system development
spu-miR-219	comp11080_c0_seq2	NOTC1_DANRE	NOTC1_DANRE Neurogenic locus notch homolog protein 1 OS=Danio rerio GN=notch1a PE=2 SV=1	151	-21.95	151	-21.95	23	2907	2825	P	GO:0060429	epithelium development
spu-miR-219	comp11080_c0_seq2	NOTC1_DANRE	NOTC1_DANRE Neurogenic locus notch homolog protein 1 OS=Danio rerio GN=notch1a PE=2 SV=1	151	-21.95	151	-21.95	23	2907	2825	P	GO:0043009	chordate embryonic development
spu-miR-219	comp11080_c0_seq2	NOTC1_DANRE	NOTC1_DANRE Neurogenic locus notch homolog protein 1 OS=Danio rerio GN=notch1a PE=2 SV=1	151	-21.95	151	-21.95	23	2907	2825	P	GO:0030182	neuron differentiation
spu-miR-219	comp11080_c0_seq2	NOTC1_DANRE	NOTC1_DANRE Neurogenic locus notch homolog protein 1 OS=Danio rerio GN=notch1a PE=2 SV=1	151	-21.95	151	-21.95	23	2907	2825	P	GO:0045597	positive regulation of cell differentiation
spu-miR-219	comp11080_c0_seq2	NOTC1_DANRE	NOTC1_DANRE Neurogenic locus notch homolog protein 1 OS=Danio rerio GN=notch1a PE=2 SV=1	151	-21.95	151	-21.95	23	2907	2825	P	GO:0045596	negative regulation of cell differentiation
spu-miR-219	comp11080_c0_seq2	NOTC1_DANRE	NOTC1_DANRE Neurogenic locus notch homolog protein 1 OS=Danio rerio GN=notch1a PE=2 SV=1	151	-21.95	151	-21.95	23	2907	2825	P	GO:0002376	immune system process
spu-miR-219	comp11080_c0_seq2	NOTC1_DANRE	NOTC1_DANRE Neurogenic locus notch homolog protein 1 OS=Danio rerio GN=notch1a PE=2 SV=1	151	-21.95	151	-21.95	23	2907	2825	C	GO:0016020	membrane
spu-miR-219	comp11080_c0_seq2	NOTC1_DANRE	NOTC1_DANRE Neurogenic locus notch homolog protein 1 OS=Danio rerio GN=notch1a PE=2 SV=1	151	-21.95	151	-21.95	23	2907	2825	P	GO:0072358	cardiovascular system development
spu-miR-219	comp11080_c0_seq2	NOTC1_DANRE	NOTC1_DANRE Neurogenic locus notch homolog protein 1 OS=Danio rerio GN=notch1a PE=2 SV=1	151	-21.95	151	-21.95	23	2907	2825	P	GO:0009952	anterior/posterior pattern specification
spu-miR-219	comp11080_c0_seq2	NOTC1_DANRE	NOTC1_DANRE Neurogenic locus notch homolog protein 1 OS=Danio rerio GN=notch1a PE=2 SV=1	151	-21.95	151	-21.95	23	2907	2825	P	GO:0009887	organ morphogenesis
spu-miR-219	comp11080_c0_seq2	NOTC1_DANRE	NOTC1_DANRE Neurogenic locus notch homolog protein 1 OS=Danio rerio GN=notch1a PE=2 SV=1	151	-21.95	151	-21.95	23	2907	2825	C	GO:0043231	intracellular membrane-bounded organelle
spu-miR-219	comp11080_c0_seq2	NOTC1_DANRE	NOTC1_DANRE Neurogenic locus notch homolog protein 1 OS=Danio rerio GN=notch1a PE=2 SV=1	151	-21.95	151	-21.95	23	2907	2825	F	GO:0005488	binding
spu-miR-219	comp11080_c0_seq2	NOTC1_DANRE	NOTC1_DANRE Neurogenic locus notch homolog protein 1 OS=Danio rerio GN=notch1a PE=2 SV=1	151	-21.95	151	-21.95	23	2907	2825	P	GO:0007166	cell surface receptor signaling pathway
spu-miR-219	comp11080_c0_seq2	NOTC1_DANRE	NOTC1_DANRE Neurogenic locus notch homolog protein 1 OS=Danio rerio GN=notch1a PE=2 SV=1	151	-21.95	151	-21.95	23	2907	2825	P	GO:0042981	regulation of apoptotic process
spu-miR-182	comp11080_c0_seq2	NOTC1_DANRE	NOTC1_DANRE Neurogenic locus notch homolog protein 1 OS=Danio rerio GN=notch1a PE=2 SV=1	288	-31.74	148	-18.15	25	2907	332 1556	P	GO:0006355	regulation of transcription, DNA-dependent
spu-miR-182	comp11080_c0_seq2	NOTC1_DANRE	NOTC1_DANRE Neurogenic locus notch homolog protein 1 OS=Danio rerio GN=notch1a PE=2 SV=1	288	-31.74	148	-18.15	25	2907	332 1556	P	GO:0045165	cell fate commitment
spu-miR-182	comp11080_c0_seq2	NOTC1_DANRE	NOTC1_DANRE Neurogenic locus notch homolog protein 1 OS=Danio rerio GN=notch1a PE=2 SV=1	288	-31.74	148	-18.15	25	2907	332 1556	P	GO:0048646	anatomical structure formation involved in morphogenesis
spu-miR-182	comp11080_c0_seq2	NOTC1_DANRE	NOTC1_DANRE Neurogenic locus notch homolog protein 1 OS=Danio rerio GN=notch1a PE=2 SV=1	288	-31.74	148	-18.15	25	2907	332 1556	P	GO:0022603	regulation of anatomical structure morphogenesis
spu-miR-182	comp11080_c0_seq2	NOTC1_DANRE	NOTC1_DANRE Neurogenic locus notch homolog protein 1 OS=Danio rerio GN=notch1a PE=2 SV=1	288	-31.74	148	-18.15	25	2907	332 1556	P	GO:0042127	regulation of cell proliferation
spu-miR-182	comp11080_c0_seq2	NOTC1_DANRE	NOTC1_DANRE Neurogenic locus notch homolog protein 1 OS=Danio rerio GN=notch1a PE=2 SV=1	288	-31.74	148	-18.15	25	2907	332 1556	P	GO:0048598	embryonic morphogenesis
spu-miR-182	comp11080_c0_seq2	NOTC1_DANRE	NOTC1_DANRE Neurogenic locus notch homolog protein 1 OS=Danio rerio GN=notch1a PE=2 SV=1	288	-31.74	148	-18.15	25	2907	332 1556	P	GO:0040007	growth
spu-miR-182	comp11080_c0_seq2	NOTC1_DANRE	NOTC1_DANRE Neurogenic locus notch homolog protein 1 OS=Danio rerio GN=notch1a PE=2 SV=1	288	-31.74	148	-18.15	25	2907	332 1556	P	GO:0009967	positive regulation of signal transduction
spu-miR-182	comp11080_c0_seq2	NOTC1_DANRE	NOTC1_DANRE Neurogenic locus notch homolog protein 1 OS=Danio rerio GN=notch1a PE=2 SV=1	288	-31.74	148	-18.15	25	2907	332 1556	P	GO:0050767	regulation of neurogenesis
spu-miR-182	comp11080_c0_seq2	NOTC1_DANRE	NOTC1_DANRE Neurogenic locus notch homolog protein 1 OS=Danio rerio GN=notch1a PE=2 SV=1	288	-31.74	148	-18.15	25	2907	332 1556	C	GO:0044444	cytoplasmic part
spu-miR-182	comp11080_c0_seq2	NOTC1_DANRE	NOTC1_DANRE Neurogenic locus notch homolog protein 1 OS=Danio rerio GN=notch1a PE=2 SV=1	288	-31.74	148	-18.15	25	2907	332 1556	P	GO:0042063	gliogenesis
spu-miR-182	comp11080_c0_seq2	NOTC1_DANRE	NOTC1_DANRE Neurogenic locus notch homolog protein 1 OS=Danio rerio GN=notch1a PE=2 SV=1	288	-31.74	148	-18.15	25	2907	332 1556	P	GO:0048729	tissue morphogenesis
spu-miR-182	comp11080_c0_seq2	NOTC1_DANRE	NOTC1_DANRE Neurogenic locus notch homolog protein 1 OS=Danio rerio GN=notch1a PE=2 SV=1	288	-31.74	148	-18.15	25	2907	332 1556	P	GO:0016043	cellular component organization
spu-miR-182	comp11080_c0_seq2	NOTC1_DANRE	NOTC1_DANRE Neurogenic locus notch homolog protein 1 OS=Danio rerio GN=notch1a PE=2 SV=1	288	-31.74	148	-18.15	25	2907	332 1556	P	GO:0007417	central nervous system development
spu-miR-182	comp11080_c0_seq2	NOTC1_DANRE	NOTC1_DANRE Neurogenic locus notch homolog protein 1 OS=Danio rerio GN=notch1a PE=2 SV=1	288	-31.74	148	-18.15	25	2907	332 1556	P	GO:0060429	epithelium development
spu-miR-182	comp11080_c0_seq2	NOTC1_DANRE	NOTC1_DANRE Neurogenic locus notch homolog protein 1 OS=Danio rerio GN=notch1a PE=2 SV=1	288	-31.74	148	-18.15	25	2907	332 1556	P	GO:0043009	chordate embryonic development
spu-miR-182	comp11080_c0_seq2	NOTC1_DANRE	NOTC1_DANRE Neurogenic locus notch homolog protein 1 OS=Danio rerio GN=notch1a PE=2 SV=1	288	-31.74	148	-18.15	25	2907	332 1556	P	GO:0030182	neuron differentiation
spu-miR-182	comp11080_c0_seq2	NOTC1_DANRE	NOTC1_DANRE Neurogenic locus notch homolog protein 1 OS=Danio rerio GN=notch1a PE=2 SV=1	288	-31.74	148	-18.15	25	2907	332 1556	P	GO:0045597	positive regulation of cell differentiation
spu-miR-182	comp11080_c0_seq2	NOTC1_DANRE	NOTC1_DANRE Neurogenic locus notch homolog protein 1 OS=Danio rerio GN=notch1a PE=2 SV=1	288	-31.74	148	-18.15	25	2907	332 1556	P	GO:0045596	negative regulation of cell differentiation
spu-miR-182	comp11080_c0_seq2	NOTC1_DANRE	NOTC1_DANRE Neurogenic locus notch homolog protein 1 OS=Danio rerio GN=notch1a PE=2 SV=1	288	-31.74	148	-18.15	25	2907	332 1556	P	GO:0002376	immune system process
spu-miR-182	comp11080_c0_seq2	NOTC1_DANRE	NOTC1_DANRE Neurogenic locus notch homolog protein 1 OS=Danio rerio GN=notch1a PE=2 SV=1	288	-31.74	148	-18.15	25	2907	332 1556	C	GO:0016020	membrane
spu-miR-182	comp11080_c0_seq2	NOTC1_DANRE	NOTC1_DANRE Neurogenic locus notch homolog protein 1 OS=Danio rerio GN=notch1a PE=2 SV=1	288	-31.74	148	-18.15	25	2907	332 1556	P	GO:0072358	cardiovascular system development
spu-miR-182	comp11080_c0_seq2	NOTC1_DANRE	NOTC1_DANRE Neurogenic locus notch homolog protein 1 OS=Danio rerio GN=notch1a PE=2 SV=1	288	-31.74	148	-18.15	25	2907	332 1556	P	GO:0009952	anterior/posterior pattern specification
spu-miR-182	comp11080_c0_seq2	NOTC1_DANRE	NOTC1_DANRE Neurogenic locus notch homolog protein 1 OS=Danio rerio GN=notch1a PE=2 SV=1	288	-31.74	148	-18.15	25	2907	332 1556	P	GO:0009887	organ morphogenesis
spu-miR-182	comp11080_c0_seq2	NOTC1_DANRE	NOTC1_DANRE Neurogenic locus notch homolog protein 1 OS=Danio rerio GN=notch1a PE=2 SV=1	288	-31.74	148	-18.15	25	2907	332 1556	C	GO:0043231	intracellular membrane-bounded organelle
spu-miR-182	comp11080_c0_seq2	NOTC1_DANRE	NOTC1_DANRE Neurogenic locus notch homolog protein 1 OS=Danio rerio GN=notch1a PE=2 SV=1	288	-31.74	148	-18.15	25	2907	332 1556	F	GO:0005488	binding
spu-miR-182	comp11080_c0_seq2	NOTC1_DANRE	NOTC1_DANRE Neurogenic locus notch homolog protein 1 OS=Danio rerio GN=notch1a PE=2 SV=1	288	-31.74	148	-18.15	25	2907	332 1556	P	GO:0007166	cell surface receptor signaling pathway
spu-miR-182	comp11080_c0_seq2	NOTC1_DANRE	NOTC1_DANRE Neurogenic locus notch homolog protein 1 OS=Danio rerio GN=notch1a PE=2 SV=1	288	-31.74	148	-18.15	25	2907	332 1556	P	GO:0042981	regulation of apoptotic process
spu-miR-92a	comp11080_c0_seq2	NOTC1_DANRE	NOTC1_DANRE Neurogenic locus notch homolog protein 1 OS=Danio rerio GN=notch1a PE=2 SV=1	166	-18.12	166	-18.12	23	2907	1685	P	GO:0006355	regulation of transcription, DNA-dependent
spu-miR-92a	comp11080_c0_seq2	NOTC1_DANRE	NOTC1_DANRE Neurogenic locus notch homolog protein 1 OS=Danio rerio GN=notch1a PE=2 SV=1	166	-18.12	166	-18.12	23	2907	1685	P	GO:0045165	cell fate commitment
spu-miR-92a	comp11080_c0_seq2	NOTC1_DANRE	NOTC1_DANRE Neurogenic locus notch homolog protein 1 OS=Danio rerio GN=notch1a PE=2 SV=1	166	-18.12	166	-18.12	23	2907	1685	P	GO:0048646	anatomical structure formation involved in morphogenesis
spu-miR-92a	comp11080_c0_seq2	NOTC1_DANRE	NOTC1_DANRE Neurogenic locus notch homolog protein 1 OS=Danio rerio GN=notch1a PE=2 SV=1	166	-18.12	166	-18.12	23	2907	1685	P	GO:0022603	regulation of anatomical structure morphogenesis
spu-miR-92a	comp11080_c0_seq2	NOTC1_DANRE	NOTC1_DANRE Neurogenic locus notch homolog protein 1 OS=Danio rerio GN=notch1a PE=2 SV=1	166	-18.12	166	-18.12	23	2907	1685	P	GO:0042127	regulation of cell proliferation
spu-miR-92a	comp11080_c0_seq2	NOTC1_DANRE	NOTC1_DANRE Neurogenic locus notch homolog protein 1 OS=Danio rerio GN=notch1a PE=2 SV=1	166	-18.12	166	-18.12	23	2907	1685	P	GO:0048598	embryonic morphogenesis
spu-miR-92a	comp11080_c0_seq2	NOTC1_DANRE	NOTC1_DANRE Neurogenic locus notch homolog protein 1 OS=Danio rerio GN=notch1a PE=2 SV=1	166	-18.12	166	-18.12	23	2907	1685	P	GO:0040007	growth
spu-miR-92a	comp11080_c0_seq2	NOTC1_DANRE	NOTC1_DANRE Neurogenic locus notch homolog protein 1 OS=Danio rerio GN=notch1a PE=2 SV=1	166	-18.12	166	-18.12	23	2907	1685	P	GO:0009967	positive regulation of signal transduction
spu-miR-92a	comp11080_c0_seq2	NOTC1_DANRE	NOTC1_DANRE Neurogenic locus notch homolog protein 1 OS=Danio rerio GN=notch1a PE=2 SV=1	166	-18.12	166	-18.12	23	2907	1685	P	GO:0050767	regulation of neurogenesis
spu-miR-92a	comp11080_c0_seq2	NOTC1_DANRE	NOTC1_DANRE Neurogenic locus notch homolog protein 1 OS=Danio rerio GN=notch1a PE=2 SV=1	166	-18.12	166	-18.12	23	2907	1685	C	GO:0044444	cytoplasmic part
spu-miR-92a	comp11080_c0_seq2	NOTC1_DANRE	NOTC1_DANRE Neurogenic locus notch homolog protein 1 OS=Danio rerio GN=notch1a PE=2 SV=1	166	-18.12	166	-18.12	23	2907	1685	P	GO:0042063	gliogenesis
spu-miR-92a	comp11080_c0_seq2	NOTC1_DANRE	NOTC1_DANRE Neurogenic locus notch homolog protein 1 OS=Danio rerio GN=notch1a PE=2 SV=1	166	-18.12	166	-18.12	23	2907	1685	P	GO:0048729	tissue morphogenesis
spu-miR-92a	comp11080_c0_seq2	NOTC1_DANRE	NOTC1_DANRE Neurogenic locus notch homolog protein 1 OS=Danio rerio GN=notch1a PE=2 SV=1	166	-18.12	166	-18.12	23	2907	1685	P	GO:0016043	cellular component organization
spu-miR-92a	comp11080_c0_seq2	NOTC1_DANRE	NOTC1_DANRE Neurogenic locus notch homolog protein 1 OS=Danio rerio GN=notch1a PE=2 SV=1	166	-18.12	166	-18.12	23	2907	1685	P	GO:0007417	central nervous system development
spu-miR-92a	comp11080_c0_seq2	NOTC1_DANRE	NOTC1_DANRE Neurogenic locus notch homolog protein 1 OS=Danio rerio GN=notch1a PE=2 SV=1	166	-18.12	166	-18.12	23	2907	1685	P	GO:0060429	epithelium development
spu-miR-92a	comp11080_c0_seq2	NOTC1_DANRE	NOTC1_DANRE Neurogenic locus notch homolog protein 1 OS=Danio rerio GN=notch1a PE=2 SV=1	166	-18.12	166	-18.12	23	2907	1685	P	GO:0043009	chordate embryonic development
spu-miR-92a	comp11080_c0_seq2	NOTC1_DANRE	NOTC1_DANRE Neurogenic locus notch homolog protein 1 OS=Danio rerio GN=notch1a PE=2 SV=1	166	-18.12	166	-18.12	23	2907	1685	P	GO:0030182	neuron differentiation
spu-miR-92a	comp11080_c0_seq2	NOTC1_DANRE	NOTC1_DANRE Neurogenic locus notch homolog protein 1 OS=Danio rerio GN=notch1a PE=2 SV=1	166	-18.12	166	-18.12	23	2907	1685	P	GO:0045597	positive regulation of cell differentiation
spu-miR-92a	comp11080_c0_seq2	NOTC1_DANRE	NOTC1_DANRE Neurogenic locus notch homolog protein 1 OS=Danio rerio GN=notch1a PE=2 SV=1	166	-18.12	166	-18.12	23	2907	1685	P	GO:0045596	negative regulation of cell differentiation
spu-miR-92a	comp11080_c0_seq2	NOTC1_DANRE	NOTC1_DANRE Neurogenic locus notch homolog protein 1 OS=Danio rerio GN=notch1a PE=2 SV=1	166	-18.12	166	-18.12	23	2907	1685	P	GO:0002376	immune system process
spu-miR-92a	comp11080_c0_seq2	NOTC1_DANRE	NOTC1_DANRE Neurogenic locus notch homolog protein 1 OS=Danio rerio GN=notch1a PE=2 SV=1	166	-18.12	166	-18.12	23	2907	1685	C	GO:0016020	membrane
spu-miR-92a	comp11080_c0_seq2	NOTC1_DANRE	NOTC1_DANRE Neurogenic locus notch homolog protein 1 OS=Danio rerio GN=notch1a PE=2 SV=1	166	-18.12	166	-18.12	23	2907	1685	P	GO:0072358	cardiovascular system development
spu-miR-92a	comp11080_c0_seq2	NOTC1_DANRE	NOTC1_DANRE Neurogenic locus notch homolog protein 1 OS=Danio rerio GN=notch1a PE=2 SV=1	166	-18.12	166	-18.12	23	2907	1685	P	GO:0009952	anterior/posterior pattern specification
spu-miR-92a	comp11080_c0_seq2	NOTC1_DANRE	NOTC1_DANRE Neurogenic locus notch homolog protein 1 OS=Danio rerio GN=notch1a PE=2 SV=1	166	-18.12	166	-18.12	23	2907	1685	P	GO:0009887	organ morphogenesis
spu-miR-92a	comp11080_c0_seq2	NOTC1_DANRE	NOTC1_DANRE Neurogenic locus notch homolog protein 1 OS=Danio rerio GN=notch1a PE=2 SV=1	166	-18.12	166	-18.12	23	2907	1685	C	GO:0043231	intracellular membrane-bounded organelle
spu-miR-92a	comp11080_c0_seq2	NOTC1_DANRE	NOTC1_DANRE Neurogenic locus notch homolog protein 1 OS=Danio rerio GN=notch1a PE=2 SV=1	166	-18.12	166	-18.12	23	2907	1685	F	GO:0005488	binding
spu-miR-92a	comp11080_c0_seq2	NOTC1_DANRE	NOTC1_DANRE Neurogenic locus notch homolog protein 1 OS=Danio rerio GN=notch1a PE=2 SV=1	166	-18.12	166	-18.12	23	2907	1685	P	GO:0007166	cell surface receptor signaling pathway
spu-miR-92a	comp11080_c0_seq2	NOTC1_DANRE	NOTC1_DANRE Neurogenic locus notch homolog protein 1 OS=Danio rerio GN=notch1a PE=2 SV=1	166	-18.12	166	-18.12	23	2907	1685	P	GO:0042981	regulation of apoptotic process
spu-miR-133	comp11080_c0_seq2	NOTC1_DANRE	NOTC1_DANRE Neurogenic locus notch homolog protein 1 OS=Danio rerio GN=notch1a PE=2 SV=1	144	-20.53	144	-20.53	23	2907	2264	P	GO:0006355	regulation of transcription, DNA-dependent
spu-miR-133	comp11080_c0_seq2	NOTC1_DANRE	NOTC1_DANRE Neurogenic locus notch homolog protein 1 OS=Danio rerio GN=notch1a PE=2 SV=1	144	-20.53	144	-20.53	23	2907	2264	P	GO:0045165	cell fate commitment
spu-miR-133	comp11080_c0_seq2	NOTC1_DANRE	NOTC1_DANRE Neurogenic locus notch homolog protein 1 OS=Danio rerio GN=notch1a PE=2 SV=1	144	-20.53	144	-20.53	23	2907	2264	P	GO:0048646	anatomical structure formation involved in morphogenesis
spu-miR-133	comp11080_c0_seq2	NOTC1_DANRE	NOTC1_DANRE Neurogenic locus notch homolog protein 1 OS=Danio rerio GN=notch1a PE=2 SV=1	144	-20.53	144	-20.53	23	2907	2264	P	GO:0022603	regulation of anatomical structure morphogenesis
spu-miR-133	comp11080_c0_seq2	NOTC1_DANRE	NOTC1_DANRE Neurogenic locus notch homolog protein 1 OS=Danio rerio GN=notch1a PE=2 SV=1	144	-20.53	144	-20.53	23	2907	2264	P	GO:0042127	regulation of cell proliferation
spu-miR-133	comp11080_c0_seq2	NOTC1_DANRE	NOTC1_DANRE Neurogenic locus notch homolog protein 1 OS=Danio rerio GN=notch1a PE=2 SV=1	144	-20.53	144	-20.53	23	2907	2264	P	GO:0048598	embryonic morphogenesis
spu-miR-133	comp11080_c0_seq2	NOTC1_DANRE	NOTC1_DANRE Neurogenic locus notch homolog protein 1 OS=Danio rerio GN=notch1a PE=2 SV=1	144	-20.53	144	-20.53	23	2907	2264	P	GO:0040007	growth
spu-miR-133	comp11080_c0_seq2	NOTC1_DANRE	NOTC1_DANRE Neurogenic locus notch homolog protein 1 OS=Danio rerio GN=notch1a PE=2 SV=1	144	-20.53	144	-20.53	23	2907	2264	P	GO:0009967	positive regulation of signal transduction
spu-miR-133	comp11080_c0_seq2	NOTC1_DANRE	NOTC1_DANRE Neurogenic locus notch homolog protein 1 OS=Danio rerio GN=notch1a PE=2 SV=1	144	-20.53	144	-20.53	23	2907	2264	P	GO:0050767	regulation of neurogenesis
spu-miR-133	comp11080_c0_seq2	NOTC1_DANRE	NOTC1_DANRE Neurogenic locus notch homolog protein 1 OS=Danio rerio GN=notch1a PE=2 SV=1	144	-20.53	144	-20.53	23	2907	2264	C	GO:0044444	cytoplasmic part
spu-miR-133	comp11080_c0_seq2	NOTC1_DANRE	NOTC1_DANRE Neurogenic locus notch homolog protein 1 OS=Danio rerio GN=notch1a PE=2 SV=1	144	-20.53	144	-20.53	23	2907	2264	P	GO:0042063	gliogenesis
spu-miR-133	comp11080_c0_seq2	NOTC1_DANRE	NOTC1_DANRE Neurogenic locus notch homolog protein 1 OS=Danio rerio GN=notch1a PE=2 SV=1	144	-20.53	144	-20.53	23	2907	2264	P	GO:0048729	tissue morphogenesis
spu-miR-133	comp11080_c0_seq2	NOTC1_DANRE	NOTC1_DANRE Neurogenic locus notch homolog protein 1 OS=Danio rerio GN=notch1a PE=2 SV=1	144	-20.53	144	-20.53	23	2907	2264	P	GO:0016043	cellular component organization
spu-miR-133	comp11080_c0_seq2	NOTC1_DANRE	NOTC1_DANRE Neurogenic locus notch homolog protein 1 OS=Danio rerio GN=notch1a PE=2 SV=1	144	-20.53	144	-20.53	23	2907	2264	P	GO:0007417	central nervous system development
spu-miR-133	comp11080_c0_seq2	NOTC1_DANRE	NOTC1_DANRE Neurogenic locus notch homolog protein 1 OS=Danio rerio GN=notch1a PE=2 SV=1	144	-20.53	144	-20.53	23	2907	2264	P	GO:0060429	epithelium development
spu-miR-133	comp11080_c0_seq2	NOTC1_DANRE	NOTC1_DANRE Neurogenic locus notch homolog protein 1 OS=Danio rerio GN=notch1a PE=2 SV=1	144	-20.53	144	-20.53	23	2907	2264	P	GO:0043009	chordate embryonic development
spu-miR-133	comp11080_c0_seq2	NOTC1_DANRE	NOTC1_DANRE Neurogenic locus notch homolog protein 1 OS=Danio rerio GN=notch1a PE=2 SV=1	144	-20.53	144	-20.53	23	2907	2264	P	GO:0030182	neuron differentiation
spu-miR-133	comp11080_c0_seq2	NOTC1_DANRE	NOTC1_DANRE Neurogenic locus notch homolog protein 1 OS=Danio rerio GN=notch1a PE=2 SV=1	144	-20.53	144	-20.53	23	2907	2264	P	GO:0045597	positive regulation of cell differentiation
spu-miR-133	comp11080_c0_seq2	NOTC1_DANRE	NOTC1_DANRE Neurogenic locus notch homolog protein 1 OS=Danio rerio GN=notch1a PE=2 SV=1	144	-20.53	144	-20.53	23	2907	2264	P	GO:0045596	negative regulation of cell differentiation
spu-miR-133	comp11080_c0_seq2	NOTC1_DANRE	NOTC1_DANRE Neurogenic locus notch homolog protein 1 OS=Danio rerio GN=notch1a PE=2 SV=1	144	-20.53	144	-20.53	23	2907	2264	P	GO:0002376	immune system process
spu-miR-133	comp11080_c0_seq2	NOTC1_DANRE	NOTC1_DANRE Neurogenic locus notch homolog protein 1 OS=Danio rerio GN=notch1a PE=2 SV=1	144	-20.53	144	-20.53	23	2907	2264	C	GO:0016020	membrane
spu-miR-133	comp11080_c0_seq2	NOTC1_DANRE	NOTC1_DANRE Neurogenic locus notch homolog protein 1 OS=Danio rerio GN=notch1a PE=2 SV=1	144	-20.53	144	-20.53	23	2907	2264	P	GO:0072358	cardiovascular system development
spu-miR-133	comp11080_c0_seq2	NOTC1_DANRE	NOTC1_DANRE Neurogenic locus notch homolog protein 1 OS=Danio rerio GN=notch1a PE=2 SV=1	144	-20.53	144	-20.53	23	2907	2264	P	GO:0009952	anterior/posterior pattern specification
spu-miR-133	comp11080_c0_seq2	NOTC1_DANRE	NOTC1_DANRE Neurogenic locus notch homolog protein 1 OS=Danio rerio GN=notch1a PE=2 SV=1	144	-20.53	144	-20.53	23	2907	2264	P	GO:0009887	organ morphogenesis
spu-miR-133	comp11080_c0_seq2	NOTC1_DANRE	NOTC1_DANRE Neurogenic locus notch homolog protein 1 OS=Danio rerio GN=notch1a PE=2 SV=1	144	-20.53	144	-20.53	23	2907	2264	C	GO:0043231	intracellular membrane-bounded organelle
spu-miR-133	comp11080_c0_seq2	NOTC1_DANRE	NOTC1_DANRE Neurogenic locus notch homolog protein 1 OS=Danio rerio GN=notch1a PE=2 SV=1	144	-20.53	144	-20.53	23	2907	2264	F	GO:0005488	binding
spu-miR-133	comp11080_c0_seq2	NOTC1_DANRE	NOTC1_DANRE Neurogenic locus notch homolog protein 1 OS=Danio rerio GN=notch1a PE=2 SV=1	144	-20.53	144	-20.53	23	2907	2264	P	GO:0007166	cell surface receptor signaling pathway
spu-miR-133	comp11080_c0_seq2	NOTC1_DANRE	NOTC1_DANRE Neurogenic locus notch homolog protein 1 OS=Danio rerio GN=notch1a PE=2 SV=1	144	-20.53	144	-20.53	23	2907	2264	P	GO:0042981	regulation of apoptotic process
spu-miR-2007	comp11080_c0_seq2	NOTC1_DANRE	NOTC1_DANRE Neurogenic locus notch homolog protein 1 OS=Danio rerio GN=notch1a PE=2 SV=1	144	-19.73	144	-19.73	23	2907	1812	P	GO:0006355	regulation of transcription, DNA-dependent
spu-miR-2007	comp11080_c0_seq2	NOTC1_DANRE	NOTC1_DANRE Neurogenic locus notch homolog protein 1 OS=Danio rerio GN=notch1a PE=2 SV=1	144	-19.73	144	-19.73	23	2907	1812	P	GO:0045165	cell fate commitment
spu-miR-2007	comp11080_c0_seq2	NOTC1_DANRE	NOTC1_DANRE Neurogenic locus notch homolog protein 1 OS=Danio rerio GN=notch1a PE=2 SV=1	144	-19.73	144	-19.73	23	2907	1812	P	GO:0048646	anatomical structure formation involved in morphogenesis
spu-miR-2007	comp11080_c0_seq2	NOTC1_DANRE	NOTC1_DANRE Neurogenic locus notch homolog protein 1 OS=Danio rerio GN=notch1a PE=2 SV=1	144	-19.73	144	-19.73	23	2907	1812	P	GO:0022603	regulation of anatomical structure morphogenesis
spu-miR-2007	comp11080_c0_seq2	NOTC1_DANRE	NOTC1_DANRE Neurogenic locus notch homolog protein 1 OS=Danio rerio GN=notch1a PE=2 SV=1	144	-19.73	144	-19.73	23	2907	1812	P	GO:0042127	regulation of cell proliferation
spu-miR-2007	comp11080_c0_seq2	NOTC1_DANRE	NOTC1_DANRE Neurogenic locus notch homolog protein 1 OS=Danio rerio GN=notch1a PE=2 SV=1	144	-19.73	144	-19.73	23	2907	1812	P	GO:0048598	embryonic morphogenesis
spu-miR-2007	comp11080_c0_seq2	NOTC1_DANRE	NOTC1_DANRE Neurogenic locus notch homolog protein 1 OS=Danio rerio GN=notch1a PE=2 SV=1	144	-19.73	144	-19.73	23	2907	1812	P	GO:0040007	growth
spu-miR-2007	comp11080_c0_seq2	NOTC1_DANRE	NOTC1_DANRE Neurogenic locus notch homolog protein 1 OS=Danio rerio GN=notch1a PE=2 SV=1	144	-19.73	144	-19.73	23	2907	1812	P	GO:0009967	positive regulation of signal transduction
spu-miR-2007	comp11080_c0_seq2	NOTC1_DANRE	NOTC1_DANRE Neurogenic locus notch homolog protein 1 OS=Danio rerio GN=notch1a PE=2 SV=1	144	-19.73	144	-19.73	23	2907	1812	P	GO:0050767	regulation of neurogenesis
spu-miR-2007	comp11080_c0_seq2	NOTC1_DANRE	NOTC1_DANRE Neurogenic locus notch homolog protein 1 OS=Danio rerio GN=notch1a PE=2 SV=1	144	-19.73	144	-19.73	23	2907	1812	C	GO:0044444	cytoplasmic part
spu-miR-2007	comp11080_c0_seq2	NOTC1_DANRE	NOTC1_DANRE Neurogenic locus notch homolog protein 1 OS=Danio rerio GN=notch1a PE=2 SV=1	144	-19.73	144	-19.73	23	2907	1812	P	GO:0042063	gliogenesis
spu-miR-2007	comp11080_c0_seq2	NOTC1_DANRE	NOTC1_DANRE Neurogenic locus notch homolog protein 1 OS=Danio rerio GN=notch1a PE=2 SV=1	144	-19.73	144	-19.73	23	2907	1812	P	GO:0048729	tissue morphogenesis
spu-miR-2007	comp11080_c0_seq2	NOTC1_DANRE	NOTC1_DANRE Neurogenic locus notch homolog protein 1 OS=Danio rerio GN=notch1a PE=2 SV=1	144	-19.73	144	-19.73	23	2907	1812	P	GO:0016043	cellular component organization
spu-miR-2007	comp11080_c0_seq2	NOTC1_DANRE	NOTC1_DANRE Neurogenic locus notch homolog protein 1 OS=Danio rerio GN=notch1a PE=2 SV=1	144	-19.73	144	-19.73	23	2907	1812	P	GO:0007417	central nervous system development
spu-miR-2007	comp11080_c0_seq2	NOTC1_DANRE	NOTC1_DANRE Neurogenic locus notch homolog protein 1 OS=Danio rerio GN=notch1a PE=2 SV=1	144	-19.73	144	-19.73	23	2907	1812	P	GO:0060429	epithelium development
spu-miR-2007	comp11080_c0_seq2	NOTC1_DANRE	NOTC1_DANRE Neurogenic locus notch homolog protein 1 OS=Danio rerio GN=notch1a PE=2 SV=1	144	-19.73	144	-19.73	23	2907	1812	P	GO:0043009	chordate embryonic development
spu-miR-2007	comp11080_c0_seq2	NOTC1_DANRE	NOTC1_DANRE Neurogenic locus notch homolog protein 1 OS=Danio rerio GN=notch1a PE=2 SV=1	144	-19.73	144	-19.73	23	2907	1812	P	GO:0030182	neuron differentiation
spu-miR-2007	comp11080_c0_seq2	NOTC1_DANRE	NOTC1_DANRE Neurogenic locus notch homolog protein 1 OS=Danio rerio GN=notch1a PE=2 SV=1	144	-19.73	144	-19.73	23	2907	1812	P	GO:0045597	positive regulation of cell differentiation
spu-miR-2007	comp11080_c0_seq2	NOTC1_DANRE	NOTC1_DANRE Neurogenic locus notch homolog protein 1 OS=Danio rerio GN=notch1a PE=2 SV=1	144	-19.73	144	-19.73	23	2907	1812	P	GO:0045596	negative regulation of cell differentiation
spu-miR-2007	comp11080_c0_seq2	NOTC1_DANRE	NOTC1_DANRE Neurogenic locus notch homolog protein 1 OS=Danio rerio GN=notch1a PE=2 SV=1	144	-19.73	144	-19.73	23	2907	1812	P	GO:0002376	immune system process
spu-miR-2007	comp11080_c0_seq2	NOTC1_DANRE	NOTC1_DANRE Neurogenic locus notch homolog protein 1 OS=Danio rerio GN=notch1a PE=2 SV=1	144	-19.73	144	-19.73	23	2907	1812	C	GO:0016020	membrane
spu-miR-2007	comp11080_c0_seq2	NOTC1_DANRE	NOTC1_DANRE Neurogenic locus notch homolog protein 1 OS=Danio rerio GN=notch1a PE=2 SV=1	144	-19.73	144	-19.73	23	2907	1812	P	GO:0072358	cardiovascular system development
spu-miR-2007	comp11080_c0_seq2	NOTC1_DANRE	NOTC1_DANRE Neurogenic locus notch homolog protein 1 OS=Danio rerio GN=notch1a PE=2 SV=1	144	-19.73	144	-19.73	23	2907	1812	P	GO:0009952	anterior/posterior pattern specification
spu-miR-2007	comp11080_c0_seq2	NOTC1_DANRE	NOTC1_DANRE Neurogenic locus notch homolog protein 1 OS=Danio rerio GN=notch1a PE=2 SV=1	144	-19.73	144	-19.73	23	2907	1812	P	GO:0009887	organ morphogenesis
spu-miR-2007	comp11080_c0_seq2	NOTC1_DANRE	NOTC1_DANRE Neurogenic locus notch homolog protein 1 OS=Danio rerio GN=notch1a PE=2 SV=1	144	-19.73	144	-19.73	23	2907	1812	C	GO:0043231	intracellular membrane-bounded organelle
spu-miR-2007	comp11080_c0_seq2	NOTC1_DANRE	NOTC1_DANRE Neurogenic locus notch homolog protein 1 OS=Danio rerio GN=notch1a PE=2 SV=1	144	-19.73	144	-19.73	23	2907	1812	F	GO:0005488	binding
spu-miR-2007	comp11080_c0_seq2	NOTC1_DANRE	NOTC1_DANRE Neurogenic locus notch homolog protein 1 OS=Danio rerio GN=notch1a PE=2 SV=1	144	-19.73	144	-19.73	23	2907	1812	P	GO:0007166	cell surface receptor signaling pathway
spu-miR-2007	comp11080_c0_seq2	NOTC1_DANRE	NOTC1_DANRE Neurogenic locus notch homolog protein 1 OS=Danio rerio GN=notch1a PE=2 SV=1	144	-19.73	144	-19.73	23	2907	1812	P	GO:0042981	regulation of apoptotic process
spu-miR-92b	comp11080_c0_seq2	NOTC1_DANRE	NOTC1_DANRE Neurogenic locus notch homolog protein 1 OS=Danio rerio GN=notch1a PE=2 SV=1	166	-18.12	166	-18.12	22	2907	1686	P	GO:0006355	regulation of transcription, DNA-dependent
spu-miR-92b	comp11080_c0_seq2	NOTC1_DANRE	NOTC1_DANRE Neurogenic locus notch homolog protein 1 OS=Danio rerio GN=notch1a PE=2 SV=1	166	-18.12	166	-18.12	22	2907	1686	P	GO:0045165	cell fate commitment
spu-miR-92b	comp11080_c0_seq2	NOTC1_DANRE	NOTC1_DANRE Neurogenic locus notch homolog protein 1 OS=Danio rerio GN=notch1a PE=2 SV=1	166	-18.12	166	-18.12	22	2907	1686	P	GO:0048646	anatomical structure formation involved in morphogenesis
spu-miR-92b	comp11080_c0_seq2	NOTC1_DANRE	NOTC1_DANRE Neurogenic locus notch homolog protein 1 OS=Danio rerio GN=notch1a PE=2 SV=1	166	-18.12	166	-18.12	22	2907	1686	P	GO:0022603	regulation of anatomical structure morphogenesis
spu-miR-92b	comp11080_c0_seq2	NOTC1_DANRE	NOTC1_DANRE Neurogenic locus notch homolog protein 1 OS=Danio rerio GN=notch1a PE=2 SV=1	166	-18.12	166	-18.12	22	2907	1686	P	GO:0042127	regulation of cell proliferation
spu-miR-92b	comp11080_c0_seq2	NOTC1_DANRE	NOTC1_DANRE Neurogenic locus notch homolog protein 1 OS=Danio rerio GN=notch1a PE=2 SV=1	166	-18.12	166	-18.12	22	2907	1686	P	GO:0048598	embryonic morphogenesis
spu-miR-92b	comp11080_c0_seq2	NOTC1_DANRE	NOTC1_DANRE Neurogenic locus notch homolog protein 1 OS=Danio rerio GN=notch1a PE=2 SV=1	166	-18.12	166	-18.12	22	2907	1686	P	GO:0040007	growth
spu-miR-92b	comp11080_c0_seq2	NOTC1_DANRE	NOTC1_DANRE Neurogenic locus notch homolog protein 1 OS=Danio rerio GN=notch1a PE=2 SV=1	166	-18.12	166	-18.12	22	2907	1686	P	GO:0009967	positive regulation of signal transduction
spu-miR-92b	comp11080_c0_seq2	NOTC1_DANRE	NOTC1_DANRE Neurogenic locus notch homolog protein 1 OS=Danio rerio GN=notch1a PE=2 SV=1	166	-18.12	166	-18.12	22	2907	1686	P	GO:0050767	regulation of neurogenesis
spu-miR-92b	comp11080_c0_seq2	NOTC1_DANRE	NOTC1_DANRE Neurogenic locus notch homolog protein 1 OS=Danio rerio GN=notch1a PE=2 SV=1	166	-18.12	166	-18.12	22	2907	1686	C	GO:0044444	cytoplasmic part
spu-miR-92b	comp11080_c0_seq2	NOTC1_DANRE	NOTC1_DANRE Neurogenic locus notch homolog protein 1 OS=Danio rerio GN=notch1a PE=2 SV=1	166	-18.12	166	-18.12	22	2907	1686	P	GO:0042063	gliogenesis
spu-miR-92b	comp11080_c0_seq2	NOTC1_DANRE	NOTC1_DANRE Neurogenic locus notch homolog protein 1 OS=Danio rerio GN=notch1a PE=2 SV=1	166	-18.12	166	-18.12	22	2907	1686	P	GO:0048729	tissue morphogenesis
spu-miR-92b	comp11080_c0_seq2	NOTC1_DANRE	NOTC1_DANRE Neurogenic locus notch homolog protein 1 OS=Danio rerio GN=notch1a PE=2 SV=1	166	-18.12	166	-18.12	22	2907	1686	P	GO:0016043	cellular component organization
spu-miR-92b	comp11080_c0_seq2	NOTC1_DANRE	NOTC1_DANRE Neurogenic locus notch homolog protein 1 OS=Danio rerio GN=notch1a PE=2 SV=1	166	-18.12	166	-18.12	22	2907	1686	P	GO:0007417	central nervous system development
spu-miR-92b	comp11080_c0_seq2	NOTC1_DANRE	NOTC1_DANRE Neurogenic locus notch homolog protein 1 OS=Danio rerio GN=notch1a PE=2 SV=1	166	-18.12	166	-18.12	22	2907	1686	P	GO:0060429	epithelium development
spu-miR-92b	comp11080_c0_seq2	NOTC1_DANRE	NOTC1_DANRE Neurogenic locus notch homolog protein 1 OS=Danio rerio GN=notch1a PE=2 SV=1	166	-18.12	166	-18.12	22	2907	1686	P	GO:0043009	chordate embryonic development
spu-miR-92b	comp11080_c0_seq2	NOTC1_DANRE	NOTC1_DANRE Neurogenic locus notch homolog protein 1 OS=Danio rerio GN=notch1a PE=2 SV=1	166	-18.12	166	-18.12	22	2907	1686	P	GO:0030182	neuron differentiation
spu-miR-92b	comp11080_c0_seq2	NOTC1_DANRE	NOTC1_DANRE Neurogenic locus notch homolog protein 1 OS=Danio rerio GN=notch1a PE=2 SV=1	166	-18.12	166	-18.12	22	2907	1686	P	GO:0045597	positive regulation of cell differentiation
spu-miR-92b	comp11080_c0_seq2	NOTC1_DANRE	NOTC1_DANRE Neurogenic locus notch homolog protein 1 OS=Danio rerio GN=notch1a PE=2 SV=1	166	-18.12	166	-18.12	22	2907	1686	P	GO:0045596	negative regulation of cell differentiation
spu-miR-92b	comp11080_c0_seq2	NOTC1_DANRE	NOTC1_DANRE Neurogenic locus notch homolog protein 1 OS=Danio rerio GN=notch1a PE=2 SV=1	166	-18.12	166	-18.12	22	2907	1686	P	GO:0002376	immune system process
spu-miR-92b	comp11080_c0_seq2	NOTC1_DANRE	NOTC1_DANRE Neurogenic locus notch homolog protein 1 OS=Danio rerio GN=notch1a PE=2 SV=1	166	-18.12	166	-18.12	22	2907	1686	C	GO:0016020	membrane
spu-miR-92b	comp11080_c0_seq2	NOTC1_DANRE	NOTC1_DANRE Neurogenic locus notch homolog protein 1 OS=Danio rerio GN=notch1a PE=2 SV=1	166	-18.12	166	-18.12	22	2907	1686	P	GO:0072358	cardiovascular system development
spu-miR-92b	comp11080_c0_seq2	NOTC1_DANRE	NOTC1_DANRE Neurogenic locus notch homolog protein 1 OS=Danio rerio GN=notch1a PE=2 SV=1	166	-18.12	166	-18.12	22	2907	1686	P	GO:0009952	anterior/posterior pattern specification
spu-miR-92b	comp11080_c0_seq2	NOTC1_DANRE	NOTC1_DANRE Neurogenic locus notch homolog protein 1 OS=Danio rerio GN=notch1a PE=2 SV=1	166	-18.12	166	-18.12	22	2907	1686	P	GO:0009887	organ morphogenesis
spu-miR-92b	comp11080_c0_seq2	NOTC1_DANRE	NOTC1_DANRE Neurogenic locus notch homolog protein 1 OS=Danio rerio GN=notch1a PE=2 SV=1	166	-18.12	166	-18.12	22	2907	1686	C	GO:0043231	intracellular membrane-bounded organelle
spu-miR-92b	comp11080_c0_seq2	NOTC1_DANRE	NOTC1_DANRE Neurogenic locus notch homolog protein 1 OS=Danio rerio GN=notch1a PE=2 SV=1	166	-18.12	166	-18.12	22	2907	1686	F	GO:0005488	binding
spu-miR-92b	comp11080_c0_seq2	NOTC1_DANRE	NOTC1_DANRE Neurogenic locus notch homolog protein 1 OS=Danio rerio GN=notch1a PE=2 SV=1	166	-18.12	166	-18.12	22	2907	1686	P	GO:0007166	cell surface receptor signaling pathway
spu-miR-92b	comp11080_c0_seq2	NOTC1_DANRE	NOTC1_DANRE Neurogenic locus notch homolog protein 1 OS=Danio rerio GN=notch1a PE=2 SV=1	166	-18.12	166	-18.12	22	2907	1686	P	GO:0042981	regulation of apoptotic process
spu-miR-4849	comp11080_c0_seq2	NOTC1_DANRE	NOTC1_DANRE Neurogenic locus notch homolog protein 1 OS=Danio rerio GN=notch1a PE=2 SV=1	437	-51.39	153	-19.78	24	2907	1754 1445 1983	P	GO:0006355	regulation of transcription, DNA-dependent
spu-miR-4849	comp11080_c0_seq2	NOTC1_DANRE	NOTC1_DANRE Neurogenic locus notch homolog protein 1 OS=Danio rerio GN=notch1a PE=2 SV=1	437	-51.39	153	-19.78	24	2907	1754 1445 1983	P	GO:0045165	cell fate commitment
spu-miR-4849	comp11080_c0_seq2	NOTC1_DANRE	NOTC1_DANRE Neurogenic locus notch homolog protein 1 OS=Danio rerio GN=notch1a PE=2 SV=1	437	-51.39	153	-19.78	24	2907	1754 1445 1983	P	GO:0048646	anatomical structure formation involved in morphogenesis
spu-miR-4849	comp11080_c0_seq2	NOTC1_DANRE	NOTC1_DANRE Neurogenic locus notch homolog protein 1 OS=Danio rerio GN=notch1a PE=2 SV=1	437	-51.39	153	-19.78	24	2907	1754 1445 1983	P	GO:0022603	regulation of anatomical structure morphogenesis
spu-miR-4849	comp11080_c0_seq2	NOTC1_DANRE	NOTC1_DANRE Neurogenic locus notch homolog protein 1 OS=Danio rerio GN=notch1a PE=2 SV=1	437	-51.39	153	-19.78	24	2907	1754 1445 1983	P	GO:0042127	regulation of cell proliferation
spu-miR-4849	comp11080_c0_seq2	NOTC1_DANRE	NOTC1_DANRE Neurogenic locus notch homolog protein 1 OS=Danio rerio GN=notch1a PE=2 SV=1	437	-51.39	153	-19.78	24	2907	1754 1445 1983	P	GO:0048598	embryonic morphogenesis
spu-miR-4849	comp11080_c0_seq2	NOTC1_DANRE	NOTC1_DANRE Neurogenic locus notch homolog protein 1 OS=Danio rerio GN=notch1a PE=2 SV=1	437	-51.39	153	-19.78	24	2907	1754 1445 1983	P	GO:0040007	growth
spu-miR-4849	comp11080_c0_seq2	NOTC1_DANRE	NOTC1_DANRE Neurogenic locus notch homolog protein 1 OS=Danio rerio GN=notch1a PE=2 SV=1	437	-51.39	153	-19.78	24	2907	1754 1445 1983	P	GO:0009967	positive regulation of signal transduction
spu-miR-4849	comp11080_c0_seq2	NOTC1_DANRE	NOTC1_DANRE Neurogenic locus notch homolog protein 1 OS=Danio rerio GN=notch1a PE=2 SV=1	437	-51.39	153	-19.78	24	2907	1754 1445 1983	P	GO:0050767	regulation of neurogenesis
spu-miR-4849	comp11080_c0_seq2	NOTC1_DANRE	NOTC1_DANRE Neurogenic locus notch homolog protein 1 OS=Danio rerio GN=notch1a PE=2 SV=1	437	-51.39	153	-19.78	24	2907	1754 1445 1983	C	GO:0044444	cytoplasmic part
spu-miR-4849	comp11080_c0_seq2	NOTC1_DANRE	NOTC1_DANRE Neurogenic locus notch homolog protein 1 OS=Danio rerio GN=notch1a PE=2 SV=1	437	-51.39	153	-19.78	24	2907	1754 1445 1983	P	GO:0042063	gliogenesis
spu-miR-4849	comp11080_c0_seq2	NOTC1_DANRE	NOTC1_DANRE Neurogenic locus notch homolog protein 1 OS=Danio rerio GN=notch1a PE=2 SV=1	437	-51.39	153	-19.78	24	2907	1754 1445 1983	P	GO:0048729	tissue morphogenesis
spu-miR-4849	comp11080_c0_seq2	NOTC1_DANRE	NOTC1_DANRE Neurogenic locus notch homolog protein 1 OS=Danio rerio GN=notch1a PE=2 SV=1	437	-51.39	153	-19.78	24	2907	1754 1445 1983	P	GO:0016043	cellular component organization
spu-miR-4849	comp11080_c0_seq2	NOTC1_DANRE	NOTC1_DANRE Neurogenic locus notch homolog protein 1 OS=Danio rerio GN=notch1a PE=2 SV=1	437	-51.39	153	-19.78	24	2907	1754 1445 1983	P	GO:0007417	central nervous system development
spu-miR-4849	comp11080_c0_seq2	NOTC1_DANRE	NOTC1_DANRE Neurogenic locus notch homolog protein 1 OS=Danio rerio GN=notch1a PE=2 SV=1	437	-51.39	153	-19.78	24	2907	1754 1445 1983	P	GO:0060429	epithelium development
spu-miR-4849	comp11080_c0_seq2	NOTC1_DANRE	NOTC1_DANRE Neurogenic locus notch homolog protein 1 OS=Danio rerio GN=notch1a PE=2 SV=1	437	-51.39	153	-19.78	24	2907	1754 1445 1983	P	GO:0043009	chordate embryonic development
spu-miR-4849	comp11080_c0_seq2	NOTC1_DANRE	NOTC1_DANRE Neurogenic locus notch homolog protein 1 OS=Danio rerio GN=notch1a PE=2 SV=1	437	-51.39	153	-19.78	24	2907	1754 1445 1983	P	GO:0030182	neuron differentiation
spu-miR-4849	comp11080_c0_seq2	NOTC1_DANRE	NOTC1_DANRE Neurogenic locus notch homolog protein 1 OS=Danio rerio GN=notch1a PE=2 SV=1	437	-51.39	153	-19.78	24	2907	1754 1445 1983	P	GO:0045597	positive regulation of cell differentiation
spu-miR-4849	comp11080_c0_seq2	NOTC1_DANRE	NOTC1_DANRE Neurogenic locus notch homolog protein 1 OS=Danio rerio GN=notch1a PE=2 SV=1	437	-51.39	153	-19.78	24	2907	1754 1445 1983	P	GO:0045596	negative regulation of cell differentiation
spu-miR-4849	comp11080_c0_seq2	NOTC1_DANRE	NOTC1_DANRE Neurogenic locus notch homolog protein 1 OS=Danio rerio GN=notch1a PE=2 SV=1	437	-51.39	153	-19.78	24	2907	1754 1445 1983	P	GO:0002376	immune system process
spu-miR-4849	comp11080_c0_seq2	NOTC1_DANRE	NOTC1_DANRE Neurogenic locus notch homolog protein 1 OS=Danio rerio GN=notch1a PE=2 SV=1	437	-51.39	153	-19.78	24	2907	1754 1445 1983	C	GO:0016020	membrane
spu-miR-4849	comp11080_c0_seq2	NOTC1_DANRE	NOTC1_DANRE Neurogenic locus notch homolog protein 1 OS=Danio rerio GN=notch1a PE=2 SV=1	437	-51.39	153	-19.78	24	2907	1754 1445 1983	P	GO:0072358	cardiovascular system development
spu-miR-4849	comp11080_c0_seq2	NOTC1_DANRE	NOTC1_DANRE Neurogenic locus notch homolog protein 1 OS=Danio rerio GN=notch1a PE=2 SV=1	437	-51.39	153	-19.78	24	2907	1754 1445 1983	P	GO:0009952	anterior/posterior pattern specification
spu-miR-4849	comp11080_c0_seq2	NOTC1_DANRE	NOTC1_DANRE Neurogenic locus notch homolog protein 1 OS=Danio rerio GN=notch1a PE=2 SV=1	437	-51.39	153	-19.78	24	2907	1754 1445 1983	P	GO:0009887	organ morphogenesis
spu-miR-4849	comp11080_c0_seq2	NOTC1_DANRE	NOTC1_DANRE Neurogenic locus notch homolog protein 1 OS=Danio rerio GN=notch1a PE=2 SV=1	437	-51.39	153	-19.78	24	2907	1754 1445 1983	C	GO:0043231	intracellular membrane-bounded organelle
spu-miR-4849	comp11080_c0_seq2	NOTC1_DANRE	NOTC1_DANRE Neurogenic locus notch homolog protein 1 OS=Danio rerio GN=notch1a PE=2 SV=1	437	-51.39	153	-19.78	24	2907	1754 1445 1983	F	GO:0005488	binding
spu-miR-4849	comp11080_c0_seq2	NOTC1_DANRE	NOTC1_DANRE Neurogenic locus notch homolog protein 1 OS=Danio rerio GN=notch1a PE=2 SV=1	437	-51.39	153	-19.78	24	2907	1754 1445 1983	P	GO:0007166	cell surface receptor signaling pathway
spu-miR-4849	comp11080_c0_seq2	NOTC1_DANRE	NOTC1_DANRE Neurogenic locus notch homolog protein 1 OS=Danio rerio GN=notch1a PE=2 SV=1	437	-51.39	153	-19.78	24	2907	1754 1445 1983	P	GO:0042981	regulation of apoptotic process
spu-miR-4854	comp11080_c0_seq2	NOTC1_DANRE	NOTC1_DANRE Neurogenic locus notch homolog protein 1 OS=Danio rerio GN=notch1a PE=2 SV=1	148	-24.25	148	-24.25	22	2907	2082	P	GO:0006355	regulation of transcription, DNA-dependent
spu-miR-4854	comp11080_c0_seq2	NOTC1_DANRE	NOTC1_DANRE Neurogenic locus notch homolog protein 1 OS=Danio rerio GN=notch1a PE=2 SV=1	148	-24.25	148	-24.25	22	2907	2082	P	GO:0045165	cell fate commitment
spu-miR-4854	comp11080_c0_seq2	NOTC1_DANRE	NOTC1_DANRE Neurogenic locus notch homolog protein 1 OS=Danio rerio GN=notch1a PE=2 SV=1	148	-24.25	148	-24.25	22	2907	2082	P	GO:0048646	anatomical structure formation involved in morphogenesis
spu-miR-4854	comp11080_c0_seq2	NOTC1_DANRE	NOTC1_DANRE Neurogenic locus notch homolog protein 1 OS=Danio rerio GN=notch1a PE=2 SV=1	148	-24.25	148	-24.25	22	2907	2082	P	GO:0022603	regulation of anatomical structure morphogenesis
spu-miR-4854	comp11080_c0_seq2	NOTC1_DANRE	NOTC1_DANRE Neurogenic locus notch homolog protein 1 OS=Danio rerio GN=notch1a PE=2 SV=1	148	-24.25	148	-24.25	22	2907	2082	P	GO:0042127	regulation of cell proliferation
spu-miR-4854	comp11080_c0_seq2	NOTC1_DANRE	NOTC1_DANRE Neurogenic locus notch homolog protein 1 OS=Danio rerio GN=notch1a PE=2 SV=1	148	-24.25	148	-24.25	22	2907	2082	P	GO:0048598	embryonic morphogenesis
spu-miR-4854	comp11080_c0_seq2	NOTC1_DANRE	NOTC1_DANRE Neurogenic locus notch homolog protein 1 OS=Danio rerio GN=notch1a PE=2 SV=1	148	-24.25	148	-24.25	22	2907	2082	P	GO:0040007	growth
spu-miR-4854	comp11080_c0_seq2	NOTC1_DANRE	NOTC1_DANRE Neurogenic locus notch homolog protein 1 OS=Danio rerio GN=notch1a PE=2 SV=1	148	-24.25	148	-24.25	22	2907	2082	P	GO:0009967	positive regulation of signal transduction
spu-miR-4854	comp11080_c0_seq2	NOTC1_DANRE	NOTC1_DANRE Neurogenic locus notch homolog protein 1 OS=Danio rerio GN=notch1a PE=2 SV=1	148	-24.25	148	-24.25	22	2907	2082	P	GO:0050767	regulation of neurogenesis
spu-miR-4854	comp11080_c0_seq2	NOTC1_DANRE	NOTC1_DANRE Neurogenic locus notch homolog protein 1 OS=Danio rerio GN=notch1a PE=2 SV=1	148	-24.25	148	-24.25	22	2907	2082	C	GO:0044444	cytoplasmic part
spu-miR-4854	comp11080_c0_seq2	NOTC1_DANRE	NOTC1_DANRE Neurogenic locus notch homolog protein 1 OS=Danio rerio GN=notch1a PE=2 SV=1	148	-24.25	148	-24.25	22	2907	2082	P	GO:0042063	gliogenesis
spu-miR-4854	comp11080_c0_seq2	NOTC1_DANRE	NOTC1_DANRE Neurogenic locus notch homolog protein 1 OS=Danio rerio GN=notch1a PE=2 SV=1	148	-24.25	148	-24.25	22	2907	2082	P	GO:0048729	tissue morphogenesis
spu-miR-4854	comp11080_c0_seq2	NOTC1_DANRE	NOTC1_DANRE Neurogenic locus notch homolog protein 1 OS=Danio rerio GN=notch1a PE=2 SV=1	148	-24.25	148	-24.25	22	2907	2082	P	GO:0016043	cellular component organization
spu-miR-4854	comp11080_c0_seq2	NOTC1_DANRE	NOTC1_DANRE Neurogenic locus notch homolog protein 1 OS=Danio rerio GN=notch1a PE=2 SV=1	148	-24.25	148	-24.25	22	2907	2082	P	GO:0007417	central nervous system development
spu-miR-4854	comp11080_c0_seq2	NOTC1_DANRE	NOTC1_DANRE Neurogenic locus notch homolog protein 1 OS=Danio rerio GN=notch1a PE=2 SV=1	148	-24.25	148	-24.25	22	2907	2082	P	GO:0060429	epithelium development
spu-miR-4854	comp11080_c0_seq2	NOTC1_DANRE	NOTC1_DANRE Neurogenic locus notch homolog protein 1 OS=Danio rerio GN=notch1a PE=2 SV=1	148	-24.25	148	-24.25	22	2907	2082	P	GO:0043009	chordate embryonic development
spu-miR-4854	comp11080_c0_seq2	NOTC1_DANRE	NOTC1_DANRE Neurogenic locus notch homolog protein 1 OS=Danio rerio GN=notch1a PE=2 SV=1	148	-24.25	148	-24.25	22	2907	2082	P	GO:0030182	neuron differentiation
spu-miR-4854	comp11080_c0_seq2	NOTC1_DANRE	NOTC1_DANRE Neurogenic locus notch homolog protein 1 OS=Danio rerio GN=notch1a PE=2 SV=1	148	-24.25	148	-24.25	22	2907	2082	P	GO:0045597	positive regulation of cell differentiation
spu-miR-4854	comp11080_c0_seq2	NOTC1_DANRE	NOTC1_DANRE Neurogenic locus notch homolog protein 1 OS=Danio rerio GN=notch1a PE=2 SV=1	148	-24.25	148	-24.25	22	2907	2082	P	GO:0045596	negative regulation of cell differentiation
spu-miR-4854	comp11080_c0_seq2	NOTC1_DANRE	NOTC1_DANRE Neurogenic locus notch homolog protein 1 OS=Danio rerio GN=notch1a PE=2 SV=1	148	-24.25	148	-24.25	22	2907	2082	P	GO:0002376	immune system process
spu-miR-4854	comp11080_c0_seq2	NOTC1_DANRE	NOTC1_DANRE Neurogenic locus notch homolog protein 1 OS=Danio rerio GN=notch1a PE=2 SV=1	148	-24.25	148	-24.25	22	2907	2082	C	GO:0016020	membrane
spu-miR-4854	comp11080_c0_seq2	NOTC1_DANRE	NOTC1_DANRE Neurogenic locus notch homolog protein 1 OS=Danio rerio GN=notch1a PE=2 SV=1	148	-24.25	148	-24.25	22	2907	2082	P	GO:0072358	cardiovascular system development
spu-miR-4854	comp11080_c0_seq2	NOTC1_DANRE	NOTC1_DANRE Neurogenic locus notch homolog protein 1 OS=Danio rerio GN=notch1a PE=2 SV=1	148	-24.25	148	-24.25	22	2907	2082	P	GO:0009952	anterior/posterior pattern specification
spu-miR-4854	comp11080_c0_seq2	NOTC1_DANRE	NOTC1_DANRE Neurogenic locus notch homolog protein 1 OS=Danio rerio GN=notch1a PE=2 SV=1	148	-24.25	148	-24.25	22	2907	2082	P	GO:0009887	organ morphogenesis
spu-miR-4854	comp11080_c0_seq2	NOTC1_DANRE	NOTC1_DANRE Neurogenic locus notch homolog protein 1 OS=Danio rerio GN=notch1a PE=2 SV=1	148	-24.25	148	-24.25	22	2907	2082	C	GO:0043231	intracellular membrane-bounded organelle
spu-miR-4854	comp11080_c0_seq2	NOTC1_DANRE	NOTC1_DANRE Neurogenic locus notch homolog protein 1 OS=Danio rerio GN=notch1a PE=2 SV=1	148	-24.25	148	-24.25	22	2907	2082	F	GO:0005488	binding
spu-miR-4854	comp11080_c0_seq2	NOTC1_DANRE	NOTC1_DANRE Neurogenic locus notch homolog protein 1 OS=Danio rerio GN=notch1a PE=2 SV=1	148	-24.25	148	-24.25	22	2907	2082	P	GO:0007166	cell surface receptor signaling pathway
spu-miR-4854	comp11080_c0_seq2	NOTC1_DANRE	NOTC1_DANRE Neurogenic locus notch homolog protein 1 OS=Danio rerio GN=notch1a PE=2 SV=1	148	-24.25	148	-24.25	22	2907	2082	P	GO:0042981	regulation of apoptotic process
spu-miR-9	comp11080_c0_seq2	NOTC1_DANRE	NOTC1_DANRE Neurogenic locus notch homolog protein 1 OS=Danio rerio GN=notch1a PE=2 SV=1	142	-17.89	142	-17.89	22	2907	2782	P	GO:0006355	regulation of transcription, DNA-dependent
spu-miR-9	comp11080_c0_seq2	NOTC1_DANRE	NOTC1_DANRE Neurogenic locus notch homolog protein 1 OS=Danio rerio GN=notch1a PE=2 SV=1	142	-17.89	142	-17.89	22	2907	2782	P	GO:0045165	cell fate commitment
spu-miR-9	comp11080_c0_seq2	NOTC1_DANRE	NOTC1_DANRE Neurogenic locus notch homolog protein 1 OS=Danio rerio GN=notch1a PE=2 SV=1	142	-17.89	142	-17.89	22	2907	2782	P	GO:0048646	anatomical structure formation involved in morphogenesis
spu-miR-9	comp11080_c0_seq2	NOTC1_DANRE	NOTC1_DANRE Neurogenic locus notch homolog protein 1 OS=Danio rerio GN=notch1a PE=2 SV=1	142	-17.89	142	-17.89	22	2907	2782	P	GO:0022603	regulation of anatomical structure morphogenesis
spu-miR-9	comp11080_c0_seq2	NOTC1_DANRE	NOTC1_DANRE Neurogenic locus notch homolog protein 1 OS=Danio rerio GN=notch1a PE=2 SV=1	142	-17.89	142	-17.89	22	2907	2782	P	GO:0042127	regulation of cell proliferation
spu-miR-9	comp11080_c0_seq2	NOTC1_DANRE	NOTC1_DANRE Neurogenic locus notch homolog protein 1 OS=Danio rerio GN=notch1a PE=2 SV=1	142	-17.89	142	-17.89	22	2907	2782	P	GO:0048598	embryonic morphogenesis
spu-miR-9	comp11080_c0_seq2	NOTC1_DANRE	NOTC1_DANRE Neurogenic locus notch homolog protein 1 OS=Danio rerio GN=notch1a PE=2 SV=1	142	-17.89	142	-17.89	22	2907	2782	P	GO:0040007	growth
spu-miR-9	comp11080_c0_seq2	NOTC1_DANRE	NOTC1_DANRE Neurogenic locus notch homolog protein 1 OS=Danio rerio GN=notch1a PE=2 SV=1	142	-17.89	142	-17.89	22	2907	2782	P	GO:0009967	positive regulation of signal transduction
spu-miR-9	comp11080_c0_seq2	NOTC1_DANRE	NOTC1_DANRE Neurogenic locus notch homolog protein 1 OS=Danio rerio GN=notch1a PE=2 SV=1	142	-17.89	142	-17.89	22	2907	2782	P	GO:0050767	regulation of neurogenesis
spu-miR-9	comp11080_c0_seq2	NOTC1_DANRE	NOTC1_DANRE Neurogenic locus notch homolog protein 1 OS=Danio rerio GN=notch1a PE=2 SV=1	142	-17.89	142	-17.89	22	2907	2782	C	GO:0044444	cytoplasmic part
spu-miR-9	comp11080_c0_seq2	NOTC1_DANRE	NOTC1_DANRE Neurogenic locus notch homolog protein 1 OS=Danio rerio GN=notch1a PE=2 SV=1	142	-17.89	142	-17.89	22	2907	2782	P	GO:0042063	gliogenesis
spu-miR-9	comp11080_c0_seq2	NOTC1_DANRE	NOTC1_DANRE Neurogenic locus notch homolog protein 1 OS=Danio rerio GN=notch1a PE=2 SV=1	142	-17.89	142	-17.89	22	2907	2782	P	GO:0048729	tissue morphogenesis
spu-miR-9	comp11080_c0_seq2	NOTC1_DANRE	NOTC1_DANRE Neurogenic locus notch homolog protein 1 OS=Danio rerio GN=notch1a PE=2 SV=1	142	-17.89	142	-17.89	22	2907	2782	P	GO:0016043	cellular component organization
spu-miR-9	comp11080_c0_seq2	NOTC1_DANRE	NOTC1_DANRE Neurogenic locus notch homolog protein 1 OS=Danio rerio GN=notch1a PE=2 SV=1	142	-17.89	142	-17.89	22	2907	2782	P	GO:0007417	central nervous system development
spu-miR-9	comp11080_c0_seq2	NOTC1_DANRE	NOTC1_DANRE Neurogenic locus notch homolog protein 1 OS=Danio rerio GN=notch1a PE=2 SV=1	142	-17.89	142	-17.89	22	2907	2782	P	GO:0060429	epithelium development
spu-miR-9	comp11080_c0_seq2	NOTC1_DANRE	NOTC1_DANRE Neurogenic locus notch homolog protein 1 OS=Danio rerio GN=notch1a PE=2 SV=1	142	-17.89	142	-17.89	22	2907	2782	P	GO:0043009	chordate embryonic development
spu-miR-9	comp11080_c0_seq2	NOTC1_DANRE	NOTC1_DANRE Neurogenic locus notch homolog protein 1 OS=Danio rerio GN=notch1a PE=2 SV=1	142	-17.89	142	-17.89	22	2907	2782	P	GO:0030182	neuron differentiation
spu-miR-9	comp11080_c0_seq2	NOTC1_DANRE	NOTC1_DANRE Neurogenic locus notch homolog protein 1 OS=Danio rerio GN=notch1a PE=2 SV=1	142	-17.89	142	-17.89	22	2907	2782	P	GO:0045597	positive regulation of cell differentiation
spu-miR-9	comp11080_c0_seq2	NOTC1_DANRE	NOTC1_DANRE Neurogenic locus notch homolog protein 1 OS=Danio rerio GN=notch1a PE=2 SV=1	142	-17.89	142	-17.89	22	2907	2782	P	GO:0045596	negative regulation of cell differentiation
spu-miR-9	comp11080_c0_seq2	NOTC1_DANRE	NOTC1_DANRE Neurogenic locus notch homolog protein 1 OS=Danio rerio GN=notch1a PE=2 SV=1	142	-17.89	142	-17.89	22	2907	2782	P	GO:0002376	immune system process
spu-miR-9	comp11080_c0_seq2	NOTC1_DANRE	NOTC1_DANRE Neurogenic locus notch homolog protein 1 OS=Danio rerio GN=notch1a PE=2 SV=1	142	-17.89	142	-17.89	22	2907	2782	C	GO:0016020	membrane
spu-miR-9	comp11080_c0_seq2	NOTC1_DANRE	NOTC1_DANRE Neurogenic locus notch homolog protein 1 OS=Danio rerio GN=notch1a PE=2 SV=1	142	-17.89	142	-17.89	22	2907	2782	P	GO:0072358	cardiovascular system development
spu-miR-9	comp11080_c0_seq2	NOTC1_DANRE	NOTC1_DANRE Neurogenic locus notch homolog protein 1 OS=Danio rerio GN=notch1a PE=2 SV=1	142	-17.89	142	-17.89	22	2907	2782	P	GO:0009952	anterior/posterior pattern specification
spu-miR-9	comp11080_c0_seq2	NOTC1_DANRE	NOTC1_DANRE Neurogenic locus notch homolog protein 1 OS=Danio rerio GN=notch1a PE=2 SV=1	142	-17.89	142	-17.89	22	2907	2782	P	GO:0009887	organ morphogenesis
spu-miR-9	comp11080_c0_seq2	NOTC1_DANRE	NOTC1_DANRE Neurogenic locus notch homolog protein 1 OS=Danio rerio GN=notch1a PE=2 SV=1	142	-17.89	142	-17.89	22	2907	2782	C	GO:0043231	intracellular membrane-bounded organelle
spu-miR-9	comp11080_c0_seq2	NOTC1_DANRE	NOTC1_DANRE Neurogenic locus notch homolog protein 1 OS=Danio rerio GN=notch1a PE=2 SV=1	142	-17.89	142	-17.89	22	2907	2782	F	GO:0005488	binding
spu-miR-9	comp11080_c0_seq2	NOTC1_DANRE	NOTC1_DANRE Neurogenic locus notch homolog protein 1 OS=Danio rerio GN=notch1a PE=2 SV=1	142	-17.89	142	-17.89	22	2907	2782	P	GO:0007166	cell surface receptor signaling pathway
spu-miR-9	comp11080_c0_seq2	NOTC1_DANRE	NOTC1_DANRE Neurogenic locus notch homolog protein 1 OS=Danio rerio GN=notch1a PE=2 SV=1	142	-17.89	142	-17.89	22	2907	2782	P	GO:0042981	regulation of apoptotic process
spu-miR-4855	comp11080_c0_seq2	NOTC1_DANRE	NOTC1_DANRE Neurogenic locus notch homolog protein 1 OS=Danio rerio GN=notch1a PE=2 SV=1	320	-46.66	164	-24.6	24	2907	1984 1746	P	GO:0006355	regulation of transcription, DNA-dependent
spu-miR-4855	comp11080_c0_seq2	NOTC1_DANRE	NOTC1_DANRE Neurogenic locus notch homolog protein 1 OS=Danio rerio GN=notch1a PE=2 SV=1	320	-46.66	164	-24.6	24	2907	1984 1746	P	GO:0045165	cell fate commitment
spu-miR-4855	comp11080_c0_seq2	NOTC1_DANRE	NOTC1_DANRE Neurogenic locus notch homolog protein 1 OS=Danio rerio GN=notch1a PE=2 SV=1	320	-46.66	164	-24.6	24	2907	1984 1746	P	GO:0048646	anatomical structure formation involved in morphogenesis
spu-miR-4855	comp11080_c0_seq2	NOTC1_DANRE	NOTC1_DANRE Neurogenic locus notch homolog protein 1 OS=Danio rerio GN=notch1a PE=2 SV=1	320	-46.66	164	-24.6	24	2907	1984 1746	P	GO:0022603	regulation of anatomical structure morphogenesis
spu-miR-4855	comp11080_c0_seq2	NOTC1_DANRE	NOTC1_DANRE Neurogenic locus notch homolog protein 1 OS=Danio rerio GN=notch1a PE=2 SV=1	320	-46.66	164	-24.6	24	2907	1984 1746	P	GO:0042127	regulation of cell proliferation
spu-miR-4855	comp11080_c0_seq2	NOTC1_DANRE	NOTC1_DANRE Neurogenic locus notch homolog protein 1 OS=Danio rerio GN=notch1a PE=2 SV=1	320	-46.66	164	-24.6	24	2907	1984 1746	P	GO:0048598	embryonic morphogenesis
spu-miR-4855	comp11080_c0_seq2	NOTC1_DANRE	NOTC1_DANRE Neurogenic locus notch homolog protein 1 OS=Danio rerio GN=notch1a PE=2 SV=1	320	-46.66	164	-24.6	24	2907	1984 1746	P	GO:0040007	growth
spu-miR-4855	comp11080_c0_seq2	NOTC1_DANRE	NOTC1_DANRE Neurogenic locus notch homolog protein 1 OS=Danio rerio GN=notch1a PE=2 SV=1	320	-46.66	164	-24.6	24	2907	1984 1746	P	GO:0009967	positive regulation of signal transduction
spu-miR-4855	comp11080_c0_seq2	NOTC1_DANRE	NOTC1_DANRE Neurogenic locus notch homolog protein 1 OS=Danio rerio GN=notch1a PE=2 SV=1	320	-46.66	164	-24.6	24	2907	1984 1746	P	GO:0050767	regulation of neurogenesis
spu-miR-4855	comp11080_c0_seq2	NOTC1_DANRE	NOTC1_DANRE Neurogenic locus notch homolog protein 1 OS=Danio rerio GN=notch1a PE=2 SV=1	320	-46.66	164	-24.6	24	2907	1984 1746	C	GO:0044444	cytoplasmic part
spu-miR-4855	comp11080_c0_seq2	NOTC1_DANRE	NOTC1_DANRE Neurogenic locus notch homolog protein 1 OS=Danio rerio GN=notch1a PE=2 SV=1	320	-46.66	164	-24.6	24	2907	1984 1746	P	GO:0042063	gliogenesis
spu-miR-4855	comp11080_c0_seq2	NOTC1_DANRE	NOTC1_DANRE Neurogenic locus notch homolog protein 1 OS=Danio rerio GN=notch1a PE=2 SV=1	320	-46.66	164	-24.6	24	2907	1984 1746	P	GO:0048729	tissue morphogenesis
spu-miR-4855	comp11080_c0_seq2	NOTC1_DANRE	NOTC1_DANRE Neurogenic locus notch homolog protein 1 OS=Danio rerio GN=notch1a PE=2 SV=1	320	-46.66	164	-24.6	24	2907	1984 1746	P	GO:0016043	cellular component organization
spu-miR-4855	comp11080_c0_seq2	NOTC1_DANRE	NOTC1_DANRE Neurogenic locus notch homolog protein 1 OS=Danio rerio GN=notch1a PE=2 SV=1	320	-46.66	164	-24.6	24	2907	1984 1746	P	GO:0007417	central nervous system development
spu-miR-4855	comp11080_c0_seq2	NOTC1_DANRE	NOTC1_DANRE Neurogenic locus notch homolog protein 1 OS=Danio rerio GN=notch1a PE=2 SV=1	320	-46.66	164	-24.6	24	2907	1984 1746	P	GO:0060429	epithelium development
spu-miR-4855	comp11080_c0_seq2	NOTC1_DANRE	NOTC1_DANRE Neurogenic locus notch homolog protein 1 OS=Danio rerio GN=notch1a PE=2 SV=1	320	-46.66	164	-24.6	24	2907	1984 1746	P	GO:0043009	chordate embryonic development
spu-miR-4855	comp11080_c0_seq2	NOTC1_DANRE	NOTC1_DANRE Neurogenic locus notch homolog protein 1 OS=Danio rerio GN=notch1a PE=2 SV=1	320	-46.66	164	-24.6	24	2907	1984 1746	P	GO:0030182	neuron differentiation
spu-miR-4855	comp11080_c0_seq2	NOTC1_DANRE	NOTC1_DANRE Neurogenic locus notch homolog protein 1 OS=Danio rerio GN=notch1a PE=2 SV=1	320	-46.66	164	-24.6	24	2907	1984 1746	P	GO:0045597	positive regulation of cell differentiation
spu-miR-4855	comp11080_c0_seq2	NOTC1_DANRE	NOTC1_DANRE Neurogenic locus notch homolog protein 1 OS=Danio rerio GN=notch1a PE=2 SV=1	320	-46.66	164	-24.6	24	2907	1984 1746	P	GO:0045596	negative regulation of cell differentiation
spu-miR-4855	comp11080_c0_seq2	NOTC1_DANRE	NOTC1_DANRE Neurogenic locus notch homolog protein 1 OS=Danio rerio GN=notch1a PE=2 SV=1	320	-46.66	164	-24.6	24	2907	1984 1746	P	GO:0002376	immune system process
spu-miR-4855	comp11080_c0_seq2	NOTC1_DANRE	NOTC1_DANRE Neurogenic locus notch homolog protein 1 OS=Danio rerio GN=notch1a PE=2 SV=1	320	-46.66	164	-24.6	24	2907	1984 1746	C	GO:0016020	membrane
spu-miR-4855	comp11080_c0_seq2	NOTC1_DANRE	NOTC1_DANRE Neurogenic locus notch homolog protein 1 OS=Danio rerio GN=notch1a PE=2 SV=1	320	-46.66	164	-24.6	24	2907	1984 1746	P	GO:0072358	cardiovascular system development
spu-miR-4855	comp11080_c0_seq2	NOTC1_DANRE	NOTC1_DANRE Neurogenic locus notch homolog protein 1 OS=Danio rerio GN=notch1a PE=2 SV=1	320	-46.66	164	-24.6	24	2907	1984 1746	P	GO:0009952	anterior/posterior pattern specification
spu-miR-4855	comp11080_c0_seq2	NOTC1_DANRE	NOTC1_DANRE Neurogenic locus notch homolog protein 1 OS=Danio rerio GN=notch1a PE=2 SV=1	320	-46.66	164	-24.6	24	2907	1984 1746	P	GO:0009887	organ morphogenesis
spu-miR-4855	comp11080_c0_seq2	NOTC1_DANRE	NOTC1_DANRE Neurogenic locus notch homolog protein 1 OS=Danio rerio GN=notch1a PE=2 SV=1	320	-46.66	164	-24.6	24	2907	1984 1746	C	GO:0043231	intracellular membrane-bounded organelle
spu-miR-4855	comp11080_c0_seq2	NOTC1_DANRE	NOTC1_DANRE Neurogenic locus notch homolog protein 1 OS=Danio rerio GN=notch1a PE=2 SV=1	320	-46.66	164	-24.6	24	2907	1984 1746	F	GO:0005488	binding
spu-miR-4855	comp11080_c0_seq2	NOTC1_DANRE	NOTC1_DANRE Neurogenic locus notch homolog protein 1 OS=Danio rerio GN=notch1a PE=2 SV=1	320	-46.66	164	-24.6	24	2907	1984 1746	P	GO:0007166	cell surface receptor signaling pathway
spu-miR-4855	comp11080_c0_seq2	NOTC1_DANRE	NOTC1_DANRE Neurogenic locus notch homolog protein 1 OS=Danio rerio GN=notch1a PE=2 SV=1	320	-46.66	164	-24.6	24	2907	1984 1746	P	GO:0042981	regulation of apoptotic process
spu-miR-4847	comp11080_c0_seq2	NOTC1_DANRE	NOTC1_DANRE Neurogenic locus notch homolog protein 1 OS=Danio rerio GN=notch1a PE=2 SV=1	447	-55.9	150	-20.69	22	2907	846 711 460	P	GO:0006355	regulation of transcription, DNA-dependent
spu-miR-4847	comp11080_c0_seq2	NOTC1_DANRE	NOTC1_DANRE Neurogenic locus notch homolog protein 1 OS=Danio rerio GN=notch1a PE=2 SV=1	447	-55.9	150	-20.69	22	2907	846 711 460	P	GO:0045165	cell fate commitment
spu-miR-4847	comp11080_c0_seq2	NOTC1_DANRE	NOTC1_DANRE Neurogenic locus notch homolog protein 1 OS=Danio rerio GN=notch1a PE=2 SV=1	447	-55.9	150	-20.69	22	2907	846 711 460	P	GO:0048646	anatomical structure formation involved in morphogenesis
spu-miR-4847	comp11080_c0_seq2	NOTC1_DANRE	NOTC1_DANRE Neurogenic locus notch homolog protein 1 OS=Danio rerio GN=notch1a PE=2 SV=1	447	-55.9	150	-20.69	22	2907	846 711 460	P	GO:0022603	regulation of anatomical structure morphogenesis
spu-miR-4847	comp11080_c0_seq2	NOTC1_DANRE	NOTC1_DANRE Neurogenic locus notch homolog protein 1 OS=Danio rerio GN=notch1a PE=2 SV=1	447	-55.9	150	-20.69	22	2907	846 711 460	P	GO:0042127	regulation of cell proliferation
spu-miR-4847	comp11080_c0_seq2	NOTC1_DANRE	NOTC1_DANRE Neurogenic locus notch homolog protein 1 OS=Danio rerio GN=notch1a PE=2 SV=1	447	-55.9	150	-20.69	22	2907	846 711 460	P	GO:0048598	embryonic morphogenesis
spu-miR-4847	comp11080_c0_seq2	NOTC1_DANRE	NOTC1_DANRE Neurogenic locus notch homolog protein 1 OS=Danio rerio GN=notch1a PE=2 SV=1	447	-55.9	150	-20.69	22	2907	846 711 460	P	GO:0040007	growth
spu-miR-4847	comp11080_c0_seq2	NOTC1_DANRE	NOTC1_DANRE Neurogenic locus notch homolog protein 1 OS=Danio rerio GN=notch1a PE=2 SV=1	447	-55.9	150	-20.69	22	2907	846 711 460	P	GO:0009967	positive regulation of signal transduction
spu-miR-4847	comp11080_c0_seq2	NOTC1_DANRE	NOTC1_DANRE Neurogenic locus notch homolog protein 1 OS=Danio rerio GN=notch1a PE=2 SV=1	447	-55.9	150	-20.69	22	2907	846 711 460	P	GO:0050767	regulation of neurogenesis
spu-miR-4847	comp11080_c0_seq2	NOTC1_DANRE	NOTC1_DANRE Neurogenic locus notch homolog protein 1 OS=Danio rerio GN=notch1a PE=2 SV=1	447	-55.9	150	-20.69	22	2907	846 711 460	C	GO:0044444	cytoplasmic part
spu-miR-4847	comp11080_c0_seq2	NOTC1_DANRE	NOTC1_DANRE Neurogenic locus notch homolog protein 1 OS=Danio rerio GN=notch1a PE=2 SV=1	447	-55.9	150	-20.69	22	2907	846 711 460	P	GO:0042063	gliogenesis
spu-miR-4847	comp11080_c0_seq2	NOTC1_DANRE	NOTC1_DANRE Neurogenic locus notch homolog protein 1 OS=Danio rerio GN=notch1a PE=2 SV=1	447	-55.9	150	-20.69	22	2907	846 711 460	P	GO:0048729	tissue morphogenesis
spu-miR-4847	comp11080_c0_seq2	NOTC1_DANRE	NOTC1_DANRE Neurogenic locus notch homolog protein 1 OS=Danio rerio GN=notch1a PE=2 SV=1	447	-55.9	150	-20.69	22	2907	846 711 460	P	GO:0016043	cellular component organization
spu-miR-4847	comp11080_c0_seq2	NOTC1_DANRE	NOTC1_DANRE Neurogenic locus notch homolog protein 1 OS=Danio rerio GN=notch1a PE=2 SV=1	447	-55.9	150	-20.69	22	2907	846 711 460	P	GO:0007417	central nervous system development
spu-miR-4847	comp11080_c0_seq2	NOTC1_DANRE	NOTC1_DANRE Neurogenic locus notch homolog protein 1 OS=Danio rerio GN=notch1a PE=2 SV=1	447	-55.9	150	-20.69	22	2907	846 711 460	P	GO:0060429	epithelium development
spu-miR-4847	comp11080_c0_seq2	NOTC1_DANRE	NOTC1_DANRE Neurogenic locus notch homolog protein 1 OS=Danio rerio GN=notch1a PE=2 SV=1	447	-55.9	150	-20.69	22	2907	846 711 460	P	GO:0043009	chordate embryonic development
spu-miR-4847	comp11080_c0_seq2	NOTC1_DANRE	NOTC1_DANRE Neurogenic locus notch homolog protein 1 OS=Danio rerio GN=notch1a PE=2 SV=1	447	-55.9	150	-20.69	22	2907	846 711 460	P	GO:0030182	neuron differentiation
spu-miR-4847	comp11080_c0_seq2	NOTC1_DANRE	NOTC1_DANRE Neurogenic locus notch homolog protein 1 OS=Danio rerio GN=notch1a PE=2 SV=1	447	-55.9	150	-20.69	22	2907	846 711 460	P	GO:0045597	positive regulation of cell differentiation
spu-miR-4847	comp11080_c0_seq2	NOTC1_DANRE	NOTC1_DANRE Neurogenic locus notch homolog protein 1 OS=Danio rerio GN=notch1a PE=2 SV=1	447	-55.9	150	-20.69	22	2907	846 711 460	P	GO:0045596	negative regulation of cell differentiation
spu-miR-4847	comp11080_c0_seq2	NOTC1_DANRE	NOTC1_DANRE Neurogenic locus notch homolog protein 1 OS=Danio rerio GN=notch1a PE=2 SV=1	447	-55.9	150	-20.69	22	2907	846 711 460	P	GO:0002376	immune system process
spu-miR-4847	comp11080_c0_seq2	NOTC1_DANRE	NOTC1_DANRE Neurogenic locus notch homolog protein 1 OS=Danio rerio GN=notch1a PE=2 SV=1	447	-55.9	150	-20.69	22	2907	846 711 460	C	GO:0016020	membrane
spu-miR-4847	comp11080_c0_seq2	NOTC1_DANRE	NOTC1_DANRE Neurogenic locus notch homolog protein 1 OS=Danio rerio GN=notch1a PE=2 SV=1	447	-55.9	150	-20.69	22	2907	846 711 460	P	GO:0072358	cardiovascular system development
spu-miR-4847	comp11080_c0_seq2	NOTC1_DANRE	NOTC1_DANRE Neurogenic locus notch homolog protein 1 OS=Danio rerio GN=notch1a PE=2 SV=1	447	-55.9	150	-20.69	22	2907	846 711 460	P	GO:0009952	anterior/posterior pattern specification
spu-miR-4847	comp11080_c0_seq2	NOTC1_DANRE	NOTC1_DANRE Neurogenic locus notch homolog protein 1 OS=Danio rerio GN=notch1a PE=2 SV=1	447	-55.9	150	-20.69	22	2907	846 711 460	P	GO:0009887	organ morphogenesis
spu-miR-4847	comp11080_c0_seq2	NOTC1_DANRE	NOTC1_DANRE Neurogenic locus notch homolog protein 1 OS=Danio rerio GN=notch1a PE=2 SV=1	447	-55.9	150	-20.69	22	2907	846 711 460	C	GO:0043231	intracellular membrane-bounded organelle
spu-miR-4847	comp11080_c0_seq2	NOTC1_DANRE	NOTC1_DANRE Neurogenic locus notch homolog protein 1 OS=Danio rerio GN=notch1a PE=2 SV=1	447	-55.9	150	-20.69	22	2907	846 711 460	F	GO:0005488	binding
spu-miR-4847	comp11080_c0_seq2	NOTC1_DANRE	NOTC1_DANRE Neurogenic locus notch homolog protein 1 OS=Danio rerio GN=notch1a PE=2 SV=1	447	-55.9	150	-20.69	22	2907	846 711 460	P	GO:0007166	cell surface receptor signaling pathway
spu-miR-4847	comp11080_c0_seq2	NOTC1_DANRE	NOTC1_DANRE Neurogenic locus notch homolog protein 1 OS=Danio rerio GN=notch1a PE=2 SV=1	447	-55.9	150	-20.69	22	2907	846 711 460	P	GO:0042981	regulation of apoptotic process
spu-miR-200	comp11080_c0_seq2	NOTC1_DANRE	NOTC1_DANRE Neurogenic locus notch homolog protein 1 OS=Danio rerio GN=notch1a PE=2 SV=1	155	-17.21	155	-17.21	23	2907	2157	P	GO:0006355	regulation of transcription, DNA-dependent
spu-miR-200	comp11080_c0_seq2	NOTC1_DANRE	NOTC1_DANRE Neurogenic locus notch homolog protein 1 OS=Danio rerio GN=notch1a PE=2 SV=1	155	-17.21	155	-17.21	23	2907	2157	P	GO:0045165	cell fate commitment
spu-miR-200	comp11080_c0_seq2	NOTC1_DANRE	NOTC1_DANRE Neurogenic locus notch homolog protein 1 OS=Danio rerio GN=notch1a PE=2 SV=1	155	-17.21	155	-17.21	23	2907	2157	P	GO:0048646	anatomical structure formation involved in morphogenesis
spu-miR-200	comp11080_c0_seq2	NOTC1_DANRE	NOTC1_DANRE Neurogenic locus notch homolog protein 1 OS=Danio rerio GN=notch1a PE=2 SV=1	155	-17.21	155	-17.21	23	2907	2157	P	GO:0022603	regulation of anatomical structure morphogenesis
spu-miR-200	comp11080_c0_seq2	NOTC1_DANRE	NOTC1_DANRE Neurogenic locus notch homolog protein 1 OS=Danio rerio GN=notch1a PE=2 SV=1	155	-17.21	155	-17.21	23	2907	2157	P	GO:0042127	regulation of cell proliferation
spu-miR-200	comp11080_c0_seq2	NOTC1_DANRE	NOTC1_DANRE Neurogenic locus notch homolog protein 1 OS=Danio rerio GN=notch1a PE=2 SV=1	155	-17.21	155	-17.21	23	2907	2157	P	GO:0048598	embryonic morphogenesis
spu-miR-200	comp11080_c0_seq2	NOTC1_DANRE	NOTC1_DANRE Neurogenic locus notch homolog protein 1 OS=Danio rerio GN=notch1a PE=2 SV=1	155	-17.21	155	-17.21	23	2907	2157	P	GO:0040007	growth
spu-miR-200	comp11080_c0_seq2	NOTC1_DANRE	NOTC1_DANRE Neurogenic locus notch homolog protein 1 OS=Danio rerio GN=notch1a PE=2 SV=1	155	-17.21	155	-17.21	23	2907	2157	P	GO:0009967	positive regulation of signal transduction
spu-miR-200	comp11080_c0_seq2	NOTC1_DANRE	NOTC1_DANRE Neurogenic locus notch homolog protein 1 OS=Danio rerio GN=notch1a PE=2 SV=1	155	-17.21	155	-17.21	23	2907	2157	P	GO:0050767	regulation of neurogenesis
spu-miR-200	comp11080_c0_seq2	NOTC1_DANRE	NOTC1_DANRE Neurogenic locus notch homolog protein 1 OS=Danio rerio GN=notch1a PE=2 SV=1	155	-17.21	155	-17.21	23	2907	2157	C	GO:0044444	cytoplasmic part
spu-miR-200	comp11080_c0_seq2	NOTC1_DANRE	NOTC1_DANRE Neurogenic locus notch homolog protein 1 OS=Danio rerio GN=notch1a PE=2 SV=1	155	-17.21	155	-17.21	23	2907	2157	P	GO:0042063	gliogenesis
spu-miR-200	comp11080_c0_seq2	NOTC1_DANRE	NOTC1_DANRE Neurogenic locus notch homolog protein 1 OS=Danio rerio GN=notch1a PE=2 SV=1	155	-17.21	155	-17.21	23	2907	2157	P	GO:0048729	tissue morphogenesis
spu-miR-200	comp11080_c0_seq2	NOTC1_DANRE	NOTC1_DANRE Neurogenic locus notch homolog protein 1 OS=Danio rerio GN=notch1a PE=2 SV=1	155	-17.21	155	-17.21	23	2907	2157	P	GO:0016043	cellular component organization
spu-miR-200	comp11080_c0_seq2	NOTC1_DANRE	NOTC1_DANRE Neurogenic locus notch homolog protein 1 OS=Danio rerio GN=notch1a PE=2 SV=1	155	-17.21	155	-17.21	23	2907	2157	P	GO:0007417	central nervous system development
spu-miR-200	comp11080_c0_seq2	NOTC1_DANRE	NOTC1_DANRE Neurogenic locus notch homolog protein 1 OS=Danio rerio GN=notch1a PE=2 SV=1	155	-17.21	155	-17.21	23	2907	2157	P	GO:0060429	epithelium development
spu-miR-200	comp11080_c0_seq2	NOTC1_DANRE	NOTC1_DANRE Neurogenic locus notch homolog protein 1 OS=Danio rerio GN=notch1a PE=2 SV=1	155	-17.21	155	-17.21	23	2907	2157	P	GO:0043009	chordate embryonic development
spu-miR-200	comp11080_c0_seq2	NOTC1_DANRE	NOTC1_DANRE Neurogenic locus notch homolog protein 1 OS=Danio rerio GN=notch1a PE=2 SV=1	155	-17.21	155	-17.21	23	2907	2157	P	GO:0030182	neuron differentiation
spu-miR-200	comp11080_c0_seq2	NOTC1_DANRE	NOTC1_DANRE Neurogenic locus notch homolog protein 1 OS=Danio rerio GN=notch1a PE=2 SV=1	155	-17.21	155	-17.21	23	2907	2157	P	GO:0045597	positive regulation of cell differentiation
spu-miR-200	comp11080_c0_seq2	NOTC1_DANRE	NOTC1_DANRE Neurogenic locus notch homolog protein 1 OS=Danio rerio GN=notch1a PE=2 SV=1	155	-17.21	155	-17.21	23	2907	2157	P	GO:0045596	negative regulation of cell differentiation
spu-miR-200	comp11080_c0_seq2	NOTC1_DANRE	NOTC1_DANRE Neurogenic locus notch homolog protein 1 OS=Danio rerio GN=notch1a PE=2 SV=1	155	-17.21	155	-17.21	23	2907	2157	P	GO:0002376	immune system process
spu-miR-200	comp11080_c0_seq2	NOTC1_DANRE	NOTC1_DANRE Neurogenic locus notch homolog protein 1 OS=Danio rerio GN=notch1a PE=2 SV=1	155	-17.21	155	-17.21	23	2907	2157	C	GO:0016020	membrane
spu-miR-200	comp11080_c0_seq2	NOTC1_DANRE	NOTC1_DANRE Neurogenic locus notch homolog protein 1 OS=Danio rerio GN=notch1a PE=2 SV=1	155	-17.21	155	-17.21	23	2907	2157	P	GO:0072358	cardiovascular system development
spu-miR-200	comp11080_c0_seq2	NOTC1_DANRE	NOTC1_DANRE Neurogenic locus notch homolog protein 1 OS=Danio rerio GN=notch1a PE=2 SV=1	155	-17.21	155	-17.21	23	2907	2157	P	GO:0009952	anterior/posterior pattern specification
spu-miR-200	comp11080_c0_seq2	NOTC1_DANRE	NOTC1_DANRE Neurogenic locus notch homolog protein 1 OS=Danio rerio GN=notch1a PE=2 SV=1	155	-17.21	155	-17.21	23	2907	2157	P	GO:0009887	organ morphogenesis
spu-miR-200	comp11080_c0_seq2	NOTC1_DANRE	NOTC1_DANRE Neurogenic locus notch homolog protein 1 OS=Danio rerio GN=notch1a PE=2 SV=1	155	-17.21	155	-17.21	23	2907	2157	C	GO:0043231	intracellular membrane-bounded organelle
spu-miR-200	comp11080_c0_seq2	NOTC1_DANRE	NOTC1_DANRE Neurogenic locus notch homolog protein 1 OS=Danio rerio GN=notch1a PE=2 SV=1	155	-17.21	155	-17.21	23	2907	2157	F	GO:0005488	binding
spu-miR-200	comp11080_c0_seq2	NOTC1_DANRE	NOTC1_DANRE Neurogenic locus notch homolog protein 1 OS=Danio rerio GN=notch1a PE=2 SV=1	155	-17.21	155	-17.21	23	2907	2157	P	GO:0007166	cell surface receptor signaling pathway
spu-miR-200	comp11080_c0_seq2	NOTC1_DANRE	NOTC1_DANRE Neurogenic locus notch homolog protein 1 OS=Danio rerio GN=notch1a PE=2 SV=1	155	-17.21	155	-17.21	23	2907	2157	P	GO:0042981	regulation of apoptotic process
spu-miR-34	comp11080_c0_seq2	NOTC1_DANRE	NOTC1_DANRE Neurogenic locus notch homolog protein 1 OS=Danio rerio GN=notch1a PE=2 SV=1	292	-37.15	149	-18.79	22	2907	1552 274	P	GO:0006355	regulation of transcription, DNA-dependent
spu-miR-34	comp11080_c0_seq2	NOTC1_DANRE	NOTC1_DANRE Neurogenic locus notch homolog protein 1 OS=Danio rerio GN=notch1a PE=2 SV=1	292	-37.15	149	-18.79	22	2907	1552 274	P	GO:0045165	cell fate commitment
spu-miR-34	comp11080_c0_seq2	NOTC1_DANRE	NOTC1_DANRE Neurogenic locus notch homolog protein 1 OS=Danio rerio GN=notch1a PE=2 SV=1	292	-37.15	149	-18.79	22	2907	1552 274	P	GO:0048646	anatomical structure formation involved in morphogenesis
spu-miR-34	comp11080_c0_seq2	NOTC1_DANRE	NOTC1_DANRE Neurogenic locus notch homolog protein 1 OS=Danio rerio GN=notch1a PE=2 SV=1	292	-37.15	149	-18.79	22	2907	1552 274	P	GO:0022603	regulation of anatomical structure morphogenesis
spu-miR-34	comp11080_c0_seq2	NOTC1_DANRE	NOTC1_DANRE Neurogenic locus notch homolog protein 1 OS=Danio rerio GN=notch1a PE=2 SV=1	292	-37.15	149	-18.79	22	2907	1552 274	P	GO:0042127	regulation of cell proliferation
spu-miR-34	comp11080_c0_seq2	NOTC1_DANRE	NOTC1_DANRE Neurogenic locus notch homolog protein 1 OS=Danio rerio GN=notch1a PE=2 SV=1	292	-37.15	149	-18.79	22	2907	1552 274	P	GO:0048598	embryonic morphogenesis
spu-miR-34	comp11080_c0_seq2	NOTC1_DANRE	NOTC1_DANRE Neurogenic locus notch homolog protein 1 OS=Danio rerio GN=notch1a PE=2 SV=1	292	-37.15	149	-18.79	22	2907	1552 274	P	GO:0040007	growth
spu-miR-34	comp11080_c0_seq2	NOTC1_DANRE	NOTC1_DANRE Neurogenic locus notch homolog protein 1 OS=Danio rerio GN=notch1a PE=2 SV=1	292	-37.15	149	-18.79	22	2907	1552 274	P	GO:0009967	positive regulation of signal transduction
spu-miR-34	comp11080_c0_seq2	NOTC1_DANRE	NOTC1_DANRE Neurogenic locus notch homolog protein 1 OS=Danio rerio GN=notch1a PE=2 SV=1	292	-37.15	149	-18.79	22	2907	1552 274	P	GO:0050767	regulation of neurogenesis
spu-miR-34	comp11080_c0_seq2	NOTC1_DANRE	NOTC1_DANRE Neurogenic locus notch homolog protein 1 OS=Danio rerio GN=notch1a PE=2 SV=1	292	-37.15	149	-18.79	22	2907	1552 274	C	GO:0044444	cytoplasmic part
spu-miR-34	comp11080_c0_seq2	NOTC1_DANRE	NOTC1_DANRE Neurogenic locus notch homolog protein 1 OS=Danio rerio GN=notch1a PE=2 SV=1	292	-37.15	149	-18.79	22	2907	1552 274	P	GO:0042063	gliogenesis
spu-miR-34	comp11080_c0_seq2	NOTC1_DANRE	NOTC1_DANRE Neurogenic locus notch homolog protein 1 OS=Danio rerio GN=notch1a PE=2 SV=1	292	-37.15	149	-18.79	22	2907	1552 274	P	GO:0048729	tissue morphogenesis
spu-miR-34	comp11080_c0_seq2	NOTC1_DANRE	NOTC1_DANRE Neurogenic locus notch homolog protein 1 OS=Danio rerio GN=notch1a PE=2 SV=1	292	-37.15	149	-18.79	22	2907	1552 274	P	GO:0016043	cellular component organization
spu-miR-34	comp11080_c0_seq2	NOTC1_DANRE	NOTC1_DANRE Neurogenic locus notch homolog protein 1 OS=Danio rerio GN=notch1a PE=2 SV=1	292	-37.15	149	-18.79	22	2907	1552 274	P	GO:0007417	central nervous system development
spu-miR-34	comp11080_c0_seq2	NOTC1_DANRE	NOTC1_DANRE Neurogenic locus notch homolog protein 1 OS=Danio rerio GN=notch1a PE=2 SV=1	292	-37.15	149	-18.79	22	2907	1552 274	P	GO:0060429	epithelium development
spu-miR-34	comp11080_c0_seq2	NOTC1_DANRE	NOTC1_DANRE Neurogenic locus notch homolog protein 1 OS=Danio rerio GN=notch1a PE=2 SV=1	292	-37.15	149	-18.79	22	2907	1552 274	P	GO:0043009	chordate embryonic development
spu-miR-34	comp11080_c0_seq2	NOTC1_DANRE	NOTC1_DANRE Neurogenic locus notch homolog protein 1 OS=Danio rerio GN=notch1a PE=2 SV=1	292	-37.15	149	-18.79	22	2907	1552 274	P	GO:0030182	neuron differentiation
spu-miR-34	comp11080_c0_seq2	NOTC1_DANRE	NOTC1_DANRE Neurogenic locus notch homolog protein 1 OS=Danio rerio GN=notch1a PE=2 SV=1	292	-37.15	149	-18.79	22	2907	1552 274	P	GO:0045597	positive regulation of cell differentiation
spu-miR-34	comp11080_c0_seq2	NOTC1_DANRE	NOTC1_DANRE Neurogenic locus notch homolog protein 1 OS=Danio rerio GN=notch1a PE=2 SV=1	292	-37.15	149	-18.79	22	2907	1552 274	P	GO:0045596	negative regulation of cell differentiation
spu-miR-34	comp11080_c0_seq2	NOTC1_DANRE	NOTC1_DANRE Neurogenic locus notch homolog protein 1 OS=Danio rerio GN=notch1a PE=2 SV=1	292	-37.15	149	-18.79	22	2907	1552 274	P	GO:0002376	immune system process
spu-miR-34	comp11080_c0_seq2	NOTC1_DANRE	NOTC1_DANRE Neurogenic locus notch homolog protein 1 OS=Danio rerio GN=notch1a PE=2 SV=1	292	-37.15	149	-18.79	22	2907	1552 274	C	GO:0016020	membrane
spu-miR-34	comp11080_c0_seq2	NOTC1_DANRE	NOTC1_DANRE Neurogenic locus notch homolog protein 1 OS=Danio rerio GN=notch1a PE=2 SV=1	292	-37.15	149	-18.79	22	2907	1552 274	P	GO:0072358	cardiovascular system development
spu-miR-34	comp11080_c0_seq2	NOTC1_DANRE	NOTC1_DANRE Neurogenic locus notch homolog protein 1 OS=Danio rerio GN=notch1a PE=2 SV=1	292	-37.15	149	-18.79	22	2907	1552 274	P	GO:0009952	anterior/posterior pattern specification
spu-miR-34	comp11080_c0_seq2	NOTC1_DANRE	NOTC1_DANRE Neurogenic locus notch homolog protein 1 OS=Danio rerio GN=notch1a PE=2 SV=1	292	-37.15	149	-18.79	22	2907	1552 274	P	GO:0009887	organ morphogenesis
spu-miR-34	comp11080_c0_seq2	NOTC1_DANRE	NOTC1_DANRE Neurogenic locus notch homolog protein 1 OS=Danio rerio GN=notch1a PE=2 SV=1	292	-37.15	149	-18.79	22	2907	1552 274	C	GO:0043231	intracellular membrane-bounded organelle
spu-miR-34	comp11080_c0_seq2	NOTC1_DANRE	NOTC1_DANRE Neurogenic locus notch homolog protein 1 OS=Danio rerio GN=notch1a PE=2 SV=1	292	-37.15	149	-18.79	22	2907	1552 274	F	GO:0005488	binding
spu-miR-34	comp11080_c0_seq2	NOTC1_DANRE	NOTC1_DANRE Neurogenic locus notch homolog protein 1 OS=Danio rerio GN=notch1a PE=2 SV=1	292	-37.15	149	-18.79	22	2907	1552 274	P	GO:0007166	cell surface receptor signaling pathway
spu-miR-34	comp11080_c0_seq2	NOTC1_DANRE	NOTC1_DANRE Neurogenic locus notch homolog protein 1 OS=Danio rerio GN=notch1a PE=2 SV=1	292	-37.15	149	-18.79	22	2907	1552 274	P	GO:0042981	regulation of apoptotic process
spu-miR-33	comp11080_c0_seq2	NOTC1_DANRE	NOTC1_DANRE Neurogenic locus notch homolog protein 1 OS=Danio rerio GN=notch1a PE=2 SV=1	142	-20.62	142	-20.62	22	2907	1497	P	GO:0006355	regulation of transcription, DNA-dependent
spu-miR-33	comp11080_c0_seq2	NOTC1_DANRE	NOTC1_DANRE Neurogenic locus notch homolog protein 1 OS=Danio rerio GN=notch1a PE=2 SV=1	142	-20.62	142	-20.62	22	2907	1497	P	GO:0045165	cell fate commitment
spu-miR-33	comp11080_c0_seq2	NOTC1_DANRE	NOTC1_DANRE Neurogenic locus notch homolog protein 1 OS=Danio rerio GN=notch1a PE=2 SV=1	142	-20.62	142	-20.62	22	2907	1497	P	GO:0048646	anatomical structure formation involved in morphogenesis
spu-miR-33	comp11080_c0_seq2	NOTC1_DANRE	NOTC1_DANRE Neurogenic locus notch homolog protein 1 OS=Danio rerio GN=notch1a PE=2 SV=1	142	-20.62	142	-20.62	22	2907	1497	P	GO:0022603	regulation of anatomical structure morphogenesis
spu-miR-33	comp11080_c0_seq2	NOTC1_DANRE	NOTC1_DANRE Neurogenic locus notch homolog protein 1 OS=Danio rerio GN=notch1a PE=2 SV=1	142	-20.62	142	-20.62	22	2907	1497	P	GO:0042127	regulation of cell proliferation
spu-miR-33	comp11080_c0_seq2	NOTC1_DANRE	NOTC1_DANRE Neurogenic locus notch homolog protein 1 OS=Danio rerio GN=notch1a PE=2 SV=1	142	-20.62	142	-20.62	22	2907	1497	P	GO:0048598	embryonic morphogenesis
spu-miR-33	comp11080_c0_seq2	NOTC1_DANRE	NOTC1_DANRE Neurogenic locus notch homolog protein 1 OS=Danio rerio GN=notch1a PE=2 SV=1	142	-20.62	142	-20.62	22	2907	1497	P	GO:0040007	growth
spu-miR-33	comp11080_c0_seq2	NOTC1_DANRE	NOTC1_DANRE Neurogenic locus notch homolog protein 1 OS=Danio rerio GN=notch1a PE=2 SV=1	142	-20.62	142	-20.62	22	2907	1497	P	GO:0009967	positive regulation of signal transduction
spu-miR-33	comp11080_c0_seq2	NOTC1_DANRE	NOTC1_DANRE Neurogenic locus notch homolog protein 1 OS=Danio rerio GN=notch1a PE=2 SV=1	142	-20.62	142	-20.62	22	2907	1497	P	GO:0050767	regulation of neurogenesis
spu-miR-33	comp11080_c0_seq2	NOTC1_DANRE	NOTC1_DANRE Neurogenic locus notch homolog protein 1 OS=Danio rerio GN=notch1a PE=2 SV=1	142	-20.62	142	-20.62	22	2907	1497	C	GO:0044444	cytoplasmic part
spu-miR-33	comp11080_c0_seq2	NOTC1_DANRE	NOTC1_DANRE Neurogenic locus notch homolog protein 1 OS=Danio rerio GN=notch1a PE=2 SV=1	142	-20.62	142	-20.62	22	2907	1497	P	GO:0042063	gliogenesis
spu-miR-33	comp11080_c0_seq2	NOTC1_DANRE	NOTC1_DANRE Neurogenic locus notch homolog protein 1 OS=Danio rerio GN=notch1a PE=2 SV=1	142	-20.62	142	-20.62	22	2907	1497	P	GO:0048729	tissue morphogenesis
spu-miR-33	comp11080_c0_seq2	NOTC1_DANRE	NOTC1_DANRE Neurogenic locus notch homolog protein 1 OS=Danio rerio GN=notch1a PE=2 SV=1	142	-20.62	142	-20.62	22	2907	1497	P	GO:0016043	cellular component organization
spu-miR-33	comp11080_c0_seq2	NOTC1_DANRE	NOTC1_DANRE Neurogenic locus notch homolog protein 1 OS=Danio rerio GN=notch1a PE=2 SV=1	142	-20.62	142	-20.62	22	2907	1497	P	GO:0007417	central nervous system development
spu-miR-33	comp11080_c0_seq2	NOTC1_DANRE	NOTC1_DANRE Neurogenic locus notch homolog protein 1 OS=Danio rerio GN=notch1a PE=2 SV=1	142	-20.62	142	-20.62	22	2907	1497	P	GO:0060429	epithelium development
spu-miR-33	comp11080_c0_seq2	NOTC1_DANRE	NOTC1_DANRE Neurogenic locus notch homolog protein 1 OS=Danio rerio GN=notch1a PE=2 SV=1	142	-20.62	142	-20.62	22	2907	1497	P	GO:0043009	chordate embryonic development
spu-miR-33	comp11080_c0_seq2	NOTC1_DANRE	NOTC1_DANRE Neurogenic locus notch homolog protein 1 OS=Danio rerio GN=notch1a PE=2 SV=1	142	-20.62	142	-20.62	22	2907	1497	P	GO:0030182	neuron differentiation
spu-miR-33	comp11080_c0_seq2	NOTC1_DANRE	NOTC1_DANRE Neurogenic locus notch homolog protein 1 OS=Danio rerio GN=notch1a PE=2 SV=1	142	-20.62	142	-20.62	22	2907	1497	P	GO:0045597	positive regulation of cell differentiation
spu-miR-33	comp11080_c0_seq2	NOTC1_DANRE	NOTC1_DANRE Neurogenic locus notch homolog protein 1 OS=Danio rerio GN=notch1a PE=2 SV=1	142	-20.62	142	-20.62	22	2907	1497	P	GO:0045596	negative regulation of cell differentiation
spu-miR-33	comp11080_c0_seq2	NOTC1_DANRE	NOTC1_DANRE Neurogenic locus notch homolog protein 1 OS=Danio rerio GN=notch1a PE=2 SV=1	142	-20.62	142	-20.62	22	2907	1497	P	GO:0002376	immune system process
spu-miR-33	comp11080_c0_seq2	NOTC1_DANRE	NOTC1_DANRE Neurogenic locus notch homolog protein 1 OS=Danio rerio GN=notch1a PE=2 SV=1	142	-20.62	142	-20.62	22	2907	1497	C	GO:0016020	membrane
spu-miR-33	comp11080_c0_seq2	NOTC1_DANRE	NOTC1_DANRE Neurogenic locus notch homolog protein 1 OS=Danio rerio GN=notch1a PE=2 SV=1	142	-20.62	142	-20.62	22	2907	1497	P	GO:0072358	cardiovascular system development
spu-miR-33	comp11080_c0_seq2	NOTC1_DANRE	NOTC1_DANRE Neurogenic locus notch homolog protein 1 OS=Danio rerio GN=notch1a PE=2 SV=1	142	-20.62	142	-20.62	22	2907	1497	P	GO:0009952	anterior/posterior pattern specification
spu-miR-33	comp11080_c0_seq2	NOTC1_DANRE	NOTC1_DANRE Neurogenic locus notch homolog protein 1 OS=Danio rerio GN=notch1a PE=2 SV=1	142	-20.62	142	-20.62	22	2907	1497	P	GO:0009887	organ morphogenesis
spu-miR-33	comp11080_c0_seq2	NOTC1_DANRE	NOTC1_DANRE Neurogenic locus notch homolog protein 1 OS=Danio rerio GN=notch1a PE=2 SV=1	142	-20.62	142	-20.62	22	2907	1497	C	GO:0043231	intracellular membrane-bounded organelle
spu-miR-33	comp11080_c0_seq2	NOTC1_DANRE	NOTC1_DANRE Neurogenic locus notch homolog protein 1 OS=Danio rerio GN=notch1a PE=2 SV=1	142	-20.62	142	-20.62	22	2907	1497	F	GO:0005488	binding
spu-miR-33	comp11080_c0_seq2	NOTC1_DANRE	NOTC1_DANRE Neurogenic locus notch homolog protein 1 OS=Danio rerio GN=notch1a PE=2 SV=1	142	-20.62	142	-20.62	22	2907	1497	P	GO:0007166	cell surface receptor signaling pathway
spu-miR-33	comp11080_c0_seq2	NOTC1_DANRE	NOTC1_DANRE Neurogenic locus notch homolog protein 1 OS=Danio rerio GN=notch1a PE=2 SV=1	142	-20.62	142	-20.62	22	2907	1497	P	GO:0042981	regulation of apoptotic process
spu-miR-Scaffold54271_281	comp11080_c0_seq2	NOTC1_DANRE	NOTC1_DANRE Neurogenic locus notch homolog protein 1 OS=Danio rerio GN=notch1a PE=2 SV=1	304	-28.32	160	-15.26	19	2907	461 1589	P	GO:0006355	regulation of transcription, DNA-dependent
spu-miR-Scaffold54271_281	comp11080_c0_seq2	NOTC1_DANRE	NOTC1_DANRE Neurogenic locus notch homolog protein 1 OS=Danio rerio GN=notch1a PE=2 SV=1	304	-28.32	160	-15.26	19	2907	461 1589	P	GO:0045165	cell fate commitment
spu-miR-Scaffold54271_281	comp11080_c0_seq2	NOTC1_DANRE	NOTC1_DANRE Neurogenic locus notch homolog protein 1 OS=Danio rerio GN=notch1a PE=2 SV=1	304	-28.32	160	-15.26	19	2907	461 1589	P	GO:0048646	anatomical structure formation involved in morphogenesis
spu-miR-Scaffold54271_281	comp11080_c0_seq2	NOTC1_DANRE	NOTC1_DANRE Neurogenic locus notch homolog protein 1 OS=Danio rerio GN=notch1a PE=2 SV=1	304	-28.32	160	-15.26	19	2907	461 1589	P	GO:0022603	regulation of anatomical structure morphogenesis
spu-miR-Scaffold54271_281	comp11080_c0_seq2	NOTC1_DANRE	NOTC1_DANRE Neurogenic locus notch homolog protein 1 OS=Danio rerio GN=notch1a PE=2 SV=1	304	-28.32	160	-15.26	19	2907	461 1589	P	GO:0042127	regulation of cell proliferation
spu-miR-Scaffold54271_281	comp11080_c0_seq2	NOTC1_DANRE	NOTC1_DANRE Neurogenic locus notch homolog protein 1 OS=Danio rerio GN=notch1a PE=2 SV=1	304	-28.32	160	-15.26	19	2907	461 1589	P	GO:0048598	embryonic morphogenesis
spu-miR-Scaffold54271_281	comp11080_c0_seq2	NOTC1_DANRE	NOTC1_DANRE Neurogenic locus notch homolog protein 1 OS=Danio rerio GN=notch1a PE=2 SV=1	304	-28.32	160	-15.26	19	2907	461 1589	P	GO:0040007	growth
spu-miR-Scaffold54271_281	comp11080_c0_seq2	NOTC1_DANRE	NOTC1_DANRE Neurogenic locus notch homolog protein 1 OS=Danio rerio GN=notch1a PE=2 SV=1	304	-28.32	160	-15.26	19	2907	461 1589	P	GO:0009967	positive regulation of signal transduction
spu-miR-Scaffold54271_281	comp11080_c0_seq2	NOTC1_DANRE	NOTC1_DANRE Neurogenic locus notch homolog protein 1 OS=Danio rerio GN=notch1a PE=2 SV=1	304	-28.32	160	-15.26	19	2907	461 1589	P	GO:0050767	regulation of neurogenesis
spu-miR-Scaffold54271_281	comp11080_c0_seq2	NOTC1_DANRE	NOTC1_DANRE Neurogenic locus notch homolog protein 1 OS=Danio rerio GN=notch1a PE=2 SV=1	304	-28.32	160	-15.26	19	2907	461 1589	C	GO:0044444	cytoplasmic part
spu-miR-Scaffold54271_281	comp11080_c0_seq2	NOTC1_DANRE	NOTC1_DANRE Neurogenic locus notch homolog protein 1 OS=Danio rerio GN=notch1a PE=2 SV=1	304	-28.32	160	-15.26	19	2907	461 1589	P	GO:0042063	gliogenesis
spu-miR-Scaffold54271_281	comp11080_c0_seq2	NOTC1_DANRE	NOTC1_DANRE Neurogenic locus notch homolog protein 1 OS=Danio rerio GN=notch1a PE=2 SV=1	304	-28.32	160	-15.26	19	2907	461 1589	P	GO:0048729	tissue morphogenesis
spu-miR-Scaffold54271_281	comp11080_c0_seq2	NOTC1_DANRE	NOTC1_DANRE Neurogenic locus notch homolog protein 1 OS=Danio rerio GN=notch1a PE=2 SV=1	304	-28.32	160	-15.26	19	2907	461 1589	P	GO:0016043	cellular component organization
spu-miR-Scaffold54271_281	comp11080_c0_seq2	NOTC1_DANRE	NOTC1_DANRE Neurogenic locus notch homolog protein 1 OS=Danio rerio GN=notch1a PE=2 SV=1	304	-28.32	160	-15.26	19	2907	461 1589	P	GO:0007417	central nervous system development
spu-miR-Scaffold54271_281	comp11080_c0_seq2	NOTC1_DANRE	NOTC1_DANRE Neurogenic locus notch homolog protein 1 OS=Danio rerio GN=notch1a PE=2 SV=1	304	-28.32	160	-15.26	19	2907	461 1589	P	GO:0060429	epithelium development
spu-miR-Scaffold54271_281	comp11080_c0_seq2	NOTC1_DANRE	NOTC1_DANRE Neurogenic locus notch homolog protein 1 OS=Danio rerio GN=notch1a PE=2 SV=1	304	-28.32	160	-15.26	19	2907	461 1589	P	GO:0043009	chordate embryonic development
spu-miR-Scaffold54271_281	comp11080_c0_seq2	NOTC1_DANRE	NOTC1_DANRE Neurogenic locus notch homolog protein 1 OS=Danio rerio GN=notch1a PE=2 SV=1	304	-28.32	160	-15.26	19	2907	461 1589	P	GO:0030182	neuron differentiation
spu-miR-Scaffold54271_281	comp11080_c0_seq2	NOTC1_DANRE	NOTC1_DANRE Neurogenic locus notch homolog protein 1 OS=Danio rerio GN=notch1a PE=2 SV=1	304	-28.32	160	-15.26	19	2907	461 1589	P	GO:0045597	positive regulation of cell differentiation
spu-miR-Scaffold54271_281	comp11080_c0_seq2	NOTC1_DANRE	NOTC1_DANRE Neurogenic locus notch homolog protein 1 OS=Danio rerio GN=notch1a PE=2 SV=1	304	-28.32	160	-15.26	19	2907	461 1589	P	GO:0045596	negative regulation of cell differentiation
spu-miR-Scaffold54271_281	comp11080_c0_seq2	NOTC1_DANRE	NOTC1_DANRE Neurogenic locus notch homolog protein 1 OS=Danio rerio GN=notch1a PE=2 SV=1	304	-28.32	160	-15.26	19	2907	461 1589	P	GO:0002376	immune system process
spu-miR-Scaffold54271_281	comp11080_c0_seq2	NOTC1_DANRE	NOTC1_DANRE Neurogenic locus notch homolog protein 1 OS=Danio rerio GN=notch1a PE=2 SV=1	304	-28.32	160	-15.26	19	2907	461 1589	C	GO:0016020	membrane
spu-miR-Scaffold54271_281	comp11080_c0_seq2	NOTC1_DANRE	NOTC1_DANRE Neurogenic locus notch homolog protein 1 OS=Danio rerio GN=notch1a PE=2 SV=1	304	-28.32	160	-15.26	19	2907	461 1589	P	GO:0072358	cardiovascular system development
spu-miR-Scaffold54271_281	comp11080_c0_seq2	NOTC1_DANRE	NOTC1_DANRE Neurogenic locus notch homolog protein 1 OS=Danio rerio GN=notch1a PE=2 SV=1	304	-28.32	160	-15.26	19	2907	461 1589	P	GO:0009952	anterior/posterior pattern specification
spu-miR-Scaffold54271_281	comp11080_c0_seq2	NOTC1_DANRE	NOTC1_DANRE Neurogenic locus notch homolog protein 1 OS=Danio rerio GN=notch1a PE=2 SV=1	304	-28.32	160	-15.26	19	2907	461 1589	P	GO:0009887	organ morphogenesis
spu-miR-Scaffold54271_281	comp11080_c0_seq2	NOTC1_DANRE	NOTC1_DANRE Neurogenic locus notch homolog protein 1 OS=Danio rerio GN=notch1a PE=2 SV=1	304	-28.32	160	-15.26	19	2907	461 1589	C	GO:0043231	intracellular membrane-bounded organelle
spu-miR-Scaffold54271_281	comp11080_c0_seq2	NOTC1_DANRE	NOTC1_DANRE Neurogenic locus notch homolog protein 1 OS=Danio rerio GN=notch1a PE=2 SV=1	304	-28.32	160	-15.26	19	2907	461 1589	F	GO:0005488	binding
spu-miR-Scaffold54271_281	comp11080_c0_seq2	NOTC1_DANRE	NOTC1_DANRE Neurogenic locus notch homolog protein 1 OS=Danio rerio GN=notch1a PE=2 SV=1	304	-28.32	160	-15.26	19	2907	461 1589	P	GO:0007166	cell surface receptor signaling pathway
spu-miR-Scaffold54271_281	comp11080_c0_seq2	NOTC1_DANRE	NOTC1_DANRE Neurogenic locus notch homolog protein 1 OS=Danio rerio GN=notch1a PE=2 SV=1	304	-28.32	160	-15.26	19	2907	461 1589	P	GO:0042981	regulation of apoptotic process
spu-miR-Scaffold36370_15	comp11080_c0_seq2	NOTC1_DANRE	NOTC1_DANRE Neurogenic locus notch homolog protein 1 OS=Danio rerio GN=notch1a PE=2 SV=1	140	-22.81	140	-22.81	21	2907	380	P	GO:0006355	regulation of transcription, DNA-dependent
spu-miR-Scaffold36370_15	comp11080_c0_seq2	NOTC1_DANRE	NOTC1_DANRE Neurogenic locus notch homolog protein 1 OS=Danio rerio GN=notch1a PE=2 SV=1	140	-22.81	140	-22.81	21	2907	380	P	GO:0045165	cell fate commitment
spu-miR-Scaffold36370_15	comp11080_c0_seq2	NOTC1_DANRE	NOTC1_DANRE Neurogenic locus notch homolog protein 1 OS=Danio rerio GN=notch1a PE=2 SV=1	140	-22.81	140	-22.81	21	2907	380	P	GO:0048646	anatomical structure formation involved in morphogenesis
spu-miR-Scaffold36370_15	comp11080_c0_seq2	NOTC1_DANRE	NOTC1_DANRE Neurogenic locus notch homolog protein 1 OS=Danio rerio GN=notch1a PE=2 SV=1	140	-22.81	140	-22.81	21	2907	380	P	GO:0022603	regulation of anatomical structure morphogenesis
spu-miR-Scaffold36370_15	comp11080_c0_seq2	NOTC1_DANRE	NOTC1_DANRE Neurogenic locus notch homolog protein 1 OS=Danio rerio GN=notch1a PE=2 SV=1	140	-22.81	140	-22.81	21	2907	380	P	GO:0042127	regulation of cell proliferation
spu-miR-Scaffold36370_15	comp11080_c0_seq2	NOTC1_DANRE	NOTC1_DANRE Neurogenic locus notch homolog protein 1 OS=Danio rerio GN=notch1a PE=2 SV=1	140	-22.81	140	-22.81	21	2907	380	P	GO:0048598	embryonic morphogenesis
spu-miR-Scaffold36370_15	comp11080_c0_seq2	NOTC1_DANRE	NOTC1_DANRE Neurogenic locus notch homolog protein 1 OS=Danio rerio GN=notch1a PE=2 SV=1	140	-22.81	140	-22.81	21	2907	380	P	GO:0040007	growth
spu-miR-Scaffold36370_15	comp11080_c0_seq2	NOTC1_DANRE	NOTC1_DANRE Neurogenic locus notch homolog protein 1 OS=Danio rerio GN=notch1a PE=2 SV=1	140	-22.81	140	-22.81	21	2907	380	P	GO:0009967	positive regulation of signal transduction
spu-miR-Scaffold36370_15	comp11080_c0_seq2	NOTC1_DANRE	NOTC1_DANRE Neurogenic locus notch homolog protein 1 OS=Danio rerio GN=notch1a PE=2 SV=1	140	-22.81	140	-22.81	21	2907	380	P	GO:0050767	regulation of neurogenesis
spu-miR-Scaffold36370_15	comp11080_c0_seq2	NOTC1_DANRE	NOTC1_DANRE Neurogenic locus notch homolog protein 1 OS=Danio rerio GN=notch1a PE=2 SV=1	140	-22.81	140	-22.81	21	2907	380	C	GO:0044444	cytoplasmic part
spu-miR-Scaffold36370_15	comp11080_c0_seq2	NOTC1_DANRE	NOTC1_DANRE Neurogenic locus notch homolog protein 1 OS=Danio rerio GN=notch1a PE=2 SV=1	140	-22.81	140	-22.81	21	2907	380	P	GO:0042063	gliogenesis
spu-miR-Scaffold36370_15	comp11080_c0_seq2	NOTC1_DANRE	NOTC1_DANRE Neurogenic locus notch homolog protein 1 OS=Danio rerio GN=notch1a PE=2 SV=1	140	-22.81	140	-22.81	21	2907	380	P	GO:0048729	tissue morphogenesis
spu-miR-Scaffold36370_15	comp11080_c0_seq2	NOTC1_DANRE	NOTC1_DANRE Neurogenic locus notch homolog protein 1 OS=Danio rerio GN=notch1a PE=2 SV=1	140	-22.81	140	-22.81	21	2907	380	P	GO:0016043	cellular component organization
spu-miR-Scaffold36370_15	comp11080_c0_seq2	NOTC1_DANRE	NOTC1_DANRE Neurogenic locus notch homolog protein 1 OS=Danio rerio GN=notch1a PE=2 SV=1	140	-22.81	140	-22.81	21	2907	380	P	GO:0007417	central nervous system development
spu-miR-Scaffold36370_15	comp11080_c0_seq2	NOTC1_DANRE	NOTC1_DANRE Neurogenic locus notch homolog protein 1 OS=Danio rerio GN=notch1a PE=2 SV=1	140	-22.81	140	-22.81	21	2907	380	P	GO:0060429	epithelium development
spu-miR-Scaffold36370_15	comp11080_c0_seq2	NOTC1_DANRE	NOTC1_DANRE Neurogenic locus notch homolog protein 1 OS=Danio rerio GN=notch1a PE=2 SV=1	140	-22.81	140	-22.81	21	2907	380	P	GO:0043009	chordate embryonic development
spu-miR-Scaffold36370_15	comp11080_c0_seq2	NOTC1_DANRE	NOTC1_DANRE Neurogenic locus notch homolog protein 1 OS=Danio rerio GN=notch1a PE=2 SV=1	140	-22.81	140	-22.81	21	2907	380	P	GO:0030182	neuron differentiation
spu-miR-Scaffold36370_15	comp11080_c0_seq2	NOTC1_DANRE	NOTC1_DANRE Neurogenic locus notch homolog protein 1 OS=Danio rerio GN=notch1a PE=2 SV=1	140	-22.81	140	-22.81	21	2907	380	P	GO:0045597	positive regulation of cell differentiation
spu-miR-Scaffold36370_15	comp11080_c0_seq2	NOTC1_DANRE	NOTC1_DANRE Neurogenic locus notch homolog protein 1 OS=Danio rerio GN=notch1a PE=2 SV=1	140	-22.81	140	-22.81	21	2907	380	P	GO:0045596	negative regulation of cell differentiation
spu-miR-Scaffold36370_15	comp11080_c0_seq2	NOTC1_DANRE	NOTC1_DANRE Neurogenic locus notch homolog protein 1 OS=Danio rerio GN=notch1a PE=2 SV=1	140	-22.81	140	-22.81	21	2907	380	P	GO:0002376	immune system process
spu-miR-Scaffold36370_15	comp11080_c0_seq2	NOTC1_DANRE	NOTC1_DANRE Neurogenic locus notch homolog protein 1 OS=Danio rerio GN=notch1a PE=2 SV=1	140	-22.81	140	-22.81	21	2907	380	C	GO:0016020	membrane
spu-miR-Scaffold36370_15	comp11080_c0_seq2	NOTC1_DANRE	NOTC1_DANRE Neurogenic locus notch homolog protein 1 OS=Danio rerio GN=notch1a PE=2 SV=1	140	-22.81	140	-22.81	21	2907	380	P	GO:0072358	cardiovascular system development
spu-miR-Scaffold36370_15	comp11080_c0_seq2	NOTC1_DANRE	NOTC1_DANRE Neurogenic locus notch homolog protein 1 OS=Danio rerio GN=notch1a PE=2 SV=1	140	-22.81	140	-22.81	21	2907	380	P	GO:0009952	anterior/posterior pattern specification
spu-miR-Scaffold36370_15	comp11080_c0_seq2	NOTC1_DANRE	NOTC1_DANRE Neurogenic locus notch homolog protein 1 OS=Danio rerio GN=notch1a PE=2 SV=1	140	-22.81	140	-22.81	21	2907	380	P	GO:0009887	organ morphogenesis
spu-miR-Scaffold36370_15	comp11080_c0_seq2	NOTC1_DANRE	NOTC1_DANRE Neurogenic locus notch homolog protein 1 OS=Danio rerio GN=notch1a PE=2 SV=1	140	-22.81	140	-22.81	21	2907	380	C	GO:0043231	intracellular membrane-bounded organelle
spu-miR-Scaffold36370_15	comp11080_c0_seq2	NOTC1_DANRE	NOTC1_DANRE Neurogenic locus notch homolog protein 1 OS=Danio rerio GN=notch1a PE=2 SV=1	140	-22.81	140	-22.81	21	2907	380	F	GO:0005488	binding
spu-miR-Scaffold36370_15	comp11080_c0_seq2	NOTC1_DANRE	NOTC1_DANRE Neurogenic locus notch homolog protein 1 OS=Danio rerio GN=notch1a PE=2 SV=1	140	-22.81	140	-22.81	21	2907	380	P	GO:0007166	cell surface receptor signaling pathway
spu-miR-Scaffold36370_15	comp11080_c0_seq2	NOTC1_DANRE	NOTC1_DANRE Neurogenic locus notch homolog protein 1 OS=Danio rerio GN=notch1a PE=2 SV=1	140	-22.81	140	-22.81	21	2907	380	P	GO:0042981	regulation of apoptotic process
spu-miR-Scaffold53378_527	comp11080_c0_seq2	NOTC1_DANRE	NOTC1_DANRE Neurogenic locus notch homolog protein 1 OS=Danio rerio GN=notch1a PE=2 SV=1	286	-22.97	143	-13.84	24	2907	694 1629	P	GO:0006355	regulation of transcription, DNA-dependent
spu-miR-Scaffold53378_527	comp11080_c0_seq2	NOTC1_DANRE	NOTC1_DANRE Neurogenic locus notch homolog protein 1 OS=Danio rerio GN=notch1a PE=2 SV=1	286	-22.97	143	-13.84	24	2907	694 1629	P	GO:0045165	cell fate commitment
spu-miR-Scaffold53378_527	comp11080_c0_seq2	NOTC1_DANRE	NOTC1_DANRE Neurogenic locus notch homolog protein 1 OS=Danio rerio GN=notch1a PE=2 SV=1	286	-22.97	143	-13.84	24	2907	694 1629	P	GO:0048646	anatomical structure formation involved in morphogenesis
spu-miR-Scaffold53378_527	comp11080_c0_seq2	NOTC1_DANRE	NOTC1_DANRE Neurogenic locus notch homolog protein 1 OS=Danio rerio GN=notch1a PE=2 SV=1	286	-22.97	143	-13.84	24	2907	694 1629	P	GO:0022603	regulation of anatomical structure morphogenesis
spu-miR-Scaffold53378_527	comp11080_c0_seq2	NOTC1_DANRE	NOTC1_DANRE Neurogenic locus notch homolog protein 1 OS=Danio rerio GN=notch1a PE=2 SV=1	286	-22.97	143	-13.84	24	2907	694 1629	P	GO:0042127	regulation of cell proliferation
spu-miR-Scaffold53378_527	comp11080_c0_seq2	NOTC1_DANRE	NOTC1_DANRE Neurogenic locus notch homolog protein 1 OS=Danio rerio GN=notch1a PE=2 SV=1	286	-22.97	143	-13.84	24	2907	694 1629	P	GO:0048598	embryonic morphogenesis
spu-miR-Scaffold53378_527	comp11080_c0_seq2	NOTC1_DANRE	NOTC1_DANRE Neurogenic locus notch homolog protein 1 OS=Danio rerio GN=notch1a PE=2 SV=1	286	-22.97	143	-13.84	24	2907	694 1629	P	GO:0040007	growth
spu-miR-Scaffold53378_527	comp11080_c0_seq2	NOTC1_DANRE	NOTC1_DANRE Neurogenic locus notch homolog protein 1 OS=Danio rerio GN=notch1a PE=2 SV=1	286	-22.97	143	-13.84	24	2907	694 1629	P	GO:0009967	positive regulation of signal transduction
spu-miR-Scaffold53378_527	comp11080_c0_seq2	NOTC1_DANRE	NOTC1_DANRE Neurogenic locus notch homolog protein 1 OS=Danio rerio GN=notch1a PE=2 SV=1	286	-22.97	143	-13.84	24	2907	694 1629	P	GO:0050767	regulation of neurogenesis
spu-miR-Scaffold53378_527	comp11080_c0_seq2	NOTC1_DANRE	NOTC1_DANRE Neurogenic locus notch homolog protein 1 OS=Danio rerio GN=notch1a PE=2 SV=1	286	-22.97	143	-13.84	24	2907	694 1629	C	GO:0044444	cytoplasmic part
spu-miR-Scaffold53378_527	comp11080_c0_seq2	NOTC1_DANRE	NOTC1_DANRE Neurogenic locus notch homolog protein 1 OS=Danio rerio GN=notch1a PE=2 SV=1	286	-22.97	143	-13.84	24	2907	694 1629	P	GO:0042063	gliogenesis
spu-miR-Scaffold53378_527	comp11080_c0_seq2	NOTC1_DANRE	NOTC1_DANRE Neurogenic locus notch homolog protein 1 OS=Danio rerio GN=notch1a PE=2 SV=1	286	-22.97	143	-13.84	24	2907	694 1629	P	GO:0048729	tissue morphogenesis
spu-miR-Scaffold53378_527	comp11080_c0_seq2	NOTC1_DANRE	NOTC1_DANRE Neurogenic locus notch homolog protein 1 OS=Danio rerio GN=notch1a PE=2 SV=1	286	-22.97	143	-13.84	24	2907	694 1629	P	GO:0016043	cellular component organization
spu-miR-Scaffold53378_527	comp11080_c0_seq2	NOTC1_DANRE	NOTC1_DANRE Neurogenic locus notch homolog protein 1 OS=Danio rerio GN=notch1a PE=2 SV=1	286	-22.97	143	-13.84	24	2907	694 1629	P	GO:0007417	central nervous system development
spu-miR-Scaffold53378_527	comp11080_c0_seq2	NOTC1_DANRE	NOTC1_DANRE Neurogenic locus notch homolog protein 1 OS=Danio rerio GN=notch1a PE=2 SV=1	286	-22.97	143	-13.84	24	2907	694 1629	P	GO:0060429	epithelium development
spu-miR-Scaffold53378_527	comp11080_c0_seq2	NOTC1_DANRE	NOTC1_DANRE Neurogenic locus notch homolog protein 1 OS=Danio rerio GN=notch1a PE=2 SV=1	286	-22.97	143	-13.84	24	2907	694 1629	P	GO:0043009	chordate embryonic development
spu-miR-Scaffold53378_527	comp11080_c0_seq2	NOTC1_DANRE	NOTC1_DANRE Neurogenic locus notch homolog protein 1 OS=Danio rerio GN=notch1a PE=2 SV=1	286	-22.97	143	-13.84	24	2907	694 1629	P	GO:0030182	neuron differentiation
spu-miR-Scaffold53378_527	comp11080_c0_seq2	NOTC1_DANRE	NOTC1_DANRE Neurogenic locus notch homolog protein 1 OS=Danio rerio GN=notch1a PE=2 SV=1	286	-22.97	143	-13.84	24	2907	694 1629	P	GO:0045597	positive regulation of cell differentiation
spu-miR-Scaffold53378_527	comp11080_c0_seq2	NOTC1_DANRE	NOTC1_DANRE Neurogenic locus notch homolog protein 1 OS=Danio rerio GN=notch1a PE=2 SV=1	286	-22.97	143	-13.84	24	2907	694 1629	P	GO:0045596	negative regulation of cell differentiation
spu-miR-Scaffold53378_527	comp11080_c0_seq2	NOTC1_DANRE	NOTC1_DANRE Neurogenic locus notch homolog protein 1 OS=Danio rerio GN=notch1a PE=2 SV=1	286	-22.97	143	-13.84	24	2907	694 1629	P	GO:0002376	immune system process
spu-miR-Scaffold53378_527	comp11080_c0_seq2	NOTC1_DANRE	NOTC1_DANRE Neurogenic locus notch homolog protein 1 OS=Danio rerio GN=notch1a PE=2 SV=1	286	-22.97	143	-13.84	24	2907	694 1629	C	GO:0016020	membrane
spu-miR-Scaffold53378_527	comp11080_c0_seq2	NOTC1_DANRE	NOTC1_DANRE Neurogenic locus notch homolog protein 1 OS=Danio rerio GN=notch1a PE=2 SV=1	286	-22.97	143	-13.84	24	2907	694 1629	P	GO:0072358	cardiovascular system development
spu-miR-Scaffold53378_527	comp11080_c0_seq2	NOTC1_DANRE	NOTC1_DANRE Neurogenic locus notch homolog protein 1 OS=Danio rerio GN=notch1a PE=2 SV=1	286	-22.97	143	-13.84	24	2907	694 1629	P	GO:0009952	anterior/posterior pattern specification
spu-miR-Scaffold53378_527	comp11080_c0_seq2	NOTC1_DANRE	NOTC1_DANRE Neurogenic locus notch homolog protein 1 OS=Danio rerio GN=notch1a PE=2 SV=1	286	-22.97	143	-13.84	24	2907	694 1629	P	GO:0009887	organ morphogenesis
spu-miR-Scaffold53378_527	comp11080_c0_seq2	NOTC1_DANRE	NOTC1_DANRE Neurogenic locus notch homolog protein 1 OS=Danio rerio GN=notch1a PE=2 SV=1	286	-22.97	143	-13.84	24	2907	694 1629	C	GO:0043231	intracellular membrane-bounded organelle
spu-miR-Scaffold53378_527	comp11080_c0_seq2	NOTC1_DANRE	NOTC1_DANRE Neurogenic locus notch homolog protein 1 OS=Danio rerio GN=notch1a PE=2 SV=1	286	-22.97	143	-13.84	24	2907	694 1629	F	GO:0005488	binding
spu-miR-Scaffold53378_527	comp11080_c0_seq2	NOTC1_DANRE	NOTC1_DANRE Neurogenic locus notch homolog protein 1 OS=Danio rerio GN=notch1a PE=2 SV=1	286	-22.97	143	-13.84	24	2907	694 1629	P	GO:0007166	cell surface receptor signaling pathway
[truncated: 34,487 more rows]
